1

2

3

4 **Respiratory physiological perturbations after acute smoke-induced lung**  
5 **injury and during extracorporeal membrane oxygenation support in sheep**

6

7

8 **Saul Chemonges<sup>1\*</sup>**

9 School of Veterinary Science, The University of Queensland, Gatton, Australia

10

11

12 \*Corresponding author

13 E-mail: [s\\_chemonges@yahoo.com](mailto:s_chemonges@yahoo.com) (SC)

14

## 15 **Abstract**

16 Numerous successful therapies developed for human medicine involve animal  
17 experimentation. Animal studies that are focused solely on translational potential, may not  
18 sufficiently document unexpected outcomes. Such studies often involve hastily developed methods,  
19 thereby leading to considerable amounts of archived data that could be used to advance veterinary  
20 science or to refine the base animal model. For example, sheep are increasingly being used as models  
21 of intensive care and therefore, any experimental data arising from such models must be interpreted  
22 and published. In this study, the hypothesis is that there is little information describing physiological  
23 data from multifaceted sheep models of intensive care and the author aimed to analyse such data to  
24 provide biological information that is currently not available for sheep that received extracorporeal  
25 life support (ECLS) following acute smoke-induced lung injury. Data from 19 mechanically  
26 ventilated adult ewes that were undergoing intensive care in a study that evaluated a form of ECLS  
27 (treatment) for acute lung injury were used to collate clinical observations. Eight sheep were injured  
28 by acute smoke inhalation prior to treatment (injured/treated), while another eight were not injured  
29 but treated (uninjured/treated). Two sheep were injured but not treated (injured/untreated), while one  
30 received room air instead of smoke as the injury and was not treated (placebo/untreated). The data  
31 were then analysed for eleven physiological categories and compared between the two treated  
32 groups. Compared with the baseline, treatment contributed to and exacerbated the deterioration of  
33 pulmonary pathology by reducing lung compliance and the arterial oxygen partial pressure to  
34 fractional inspired oxygen ( $\text{PaO}_2/\text{FiO}_2$ ) ratio. The oxygen extraction index changes mirrored those of  
35 the  $\text{PaO}_2/\text{FiO}_2$  ratio. Decreasing coronary perfusion pressure predicted the severity of  
36 cardiopulmonary injury. These novel observations could help in understanding similar pathology  
37 such as that which occurs in animal victims of smoke inhalation from house or bush fires, aspiration  
38 pneumonia secondary to tick paralysis and in the management of the severe coronavirus disease 2019  
39 (COVID-19) in humans.

40

## 41 **Introduction**

42           During multifaceted experiments involving intensive care in large animal models in  
43 translational research, information related to animal monitoring is often collected with varying  
44 accuracy, scope, and end-user applications. Data collection can be manual, electronic, or both [1-3].  
45 Manually input data can include subjectively scored end points, like the plane of anaesthesia, and  
46 objective data such as heart rate or breaths per minute. Depending on the goals of the study, certain  
47 information may be used to validate or test novel therapies, or to understand and refine existing  
48 treatments. In certain cases, experimental information may be collected for scientific curiosity or for  
49 ‘classified’ use, and outcomes may never be publicly available, particularly if the results are  
50 negative.

51           The source of data for this study was from a sheep model [2-5] in which sheep were treated  
52 for acute smoke-induced acute lung injury using veno-venous (VV) extracorporeal membrane  
53 oxygenation (ECMO) [2], a form of extracorporeal life support (ECLS) developed to complement  
54 the treatment of acute lung injury in humans [6-8]. During this type of ECLS, venous blood is carried  
55 from the patient to a gas exchange device where the blood is enriched with oxygen, has carbon  
56 dioxide removed, and oxygenated blood is returned to the patient’s circulation in the right atrium.  
57 This method can be used for treatment, as respiratory support during lung transplantation, and in  
58 critically ill patients with potentially reversible respiratory failure [8,9]. The multiple advanced  
59 cardiovascular [3], respiratory, patient point-of-care procedures and instrumentation associated with  
60 ECLS even in animal experimentation is highly data- and equipment-intensive. This platform is  
61 useful for developing research and methodological skills for *in vivo* animal instrumentation and for  
62 the processing of large, real-time clinical data sets from multifaceted animal studies that can be  
63 applied to similar intensive care scenarios. An opportunity to develop these skills arose within a  
64 source study conducted at Queensland University of Technology and The University of Queensland,  
65 which was an ongoing publicly funded animal experimentation study. While the objectives of the  
66 primary study had a separate focus, there were considerable amounts of redundant raw data with

67 potential use in veterinary science and other disciplines, once processed. The author hypothesised  
68 that there is little information describing physiological data from multifaceted sheep models of  
69 intensive care and the author aimed to analyse such data to provide biological information that is not  
70 currently available for sheep that receive ECLS following acute smoke-induced acute lung injury.

71 The overall goal was to provide useful information relevant to the sheep model itself as well  
72 as to those interested in broad animal experimentation and veterinary medicine in general. The  
73 specific objective was to utilise the raw data from the sheep ECMO model study and analyse that  
74 data to provide biological information that is not currently available for sheep that receive ECLS  
75 following acute smoke-induced lung injury to further understand the physiology of respiratory  
76 support.

## 77 **Materials and methods**

### 78 **Ethics statement**

79 Animals were obtained and treated in accordance with the Australian Code of Practice for the  
80 Care and Use of Animals for Scientific Purposes [10]. All studies were registered with institutional  
81 animal welfare and ethics departments; moreover, the Queensland University of Technology Animal  
82 Ethics Approval No. 110000053 was obtained and it was ratified by The University of Queensland.

83

### 84 **Animal experimental groups**

85 The study involved 19 sheep divided into 4 experimental groups (Table 1). The experimental  
86 groups were classified based on the following two aspects: the duration of treatment (24 hours of  
87 ECMO only—E24H); treatment after smoke inhalation (injury) (24 hours of ECMO after smoke  
88 inhalation—SE24H). Two additional groups included one group that received smoke inhalation  
89 injury but no treatment (24 hours of monitoring only after smoke inhalation and no ECMO; SC24H),  
90 and another group that inhaled room air only as the injury (placebo) and no treatment (24 hours of  
91 monitoring, no smoke inhalation and no ECMO; C24H). Robust data was acquired from 16 sheep  
92 (E24H and SE24H) and included fully in the study; however, data of three sheep from groups

93 SC24H and C24H was considered only as early observational data. A systematic approach was  
 94 developed for processing the data. (All raw and processed data can be downloaded at  
 95 doi:10.5061/dryad.3r2280gd5.)

96 **Table 1. Characteristics of treated and untreated groups (control experiments) of sheep**

| Experiment Group | Date of experiment | Sheep No.        | Age (Y) | Weight (kg) | Length of Sheep (cm) | BSA  |
|------------------|--------------------|------------------|---------|-------------|----------------------|------|
| E24H             | 06/10/2011         | E24H-01/390      | 2       | 50          | 110                  | 1.29 |
|                  | 20/10/2011         | E24H-02          | 2       | 47.6        | 110                  | 1.25 |
|                  | 17/11/2011         | E24H-03          | 2       | 51          | 110                  | 1.31 |
|                  | 01/03/2012         | E24H/4616        | 2       | 50          | 110                  | 1.29 |
|                  | 29/03/2012         | E24H-05/4627     | 2       | 47          | 110                  | 1.24 |
|                  | 04/04/2012         | E24H-06/4146     | 2       | 40          | 110                  | 1.11 |
|                  | 12/04/2012         | E24H-07/4032     | 2       | 52.5        | 110                  | 1.34 |
|                  | 03/05/2012         | E24H-08/4630     | 2       | 53          | 110                  | 1.34 |
| SE24H            | 02/02/2012         | SE24H-01/4139    | 2       | 44          | 110                  | 1.19 |
|                  | 09/02/2012         | SE24H-02/4542    | 2       | 53          | 110                  | 1.34 |
|                  | 16/02/2012         | SE24H-03/4280    | 2       | 45.5        | 110                  | 1.21 |
|                  | 23/02/2012         | SE24H-04/4624    | 2       | 50          | 110                  | 1.29 |
|                  | 17/05/2012         | SE24H-05/4458    | 2       | 55          | 140                  | 1.38 |
|                  | 24/05/2012         | SE24H-06/8461    | 2       | 46          | 140                  | 1.22 |
|                  | 24/01/2013         | SE24H-07/09C8032 | 3       | 52          | 130                  | 1.33 |
|                  | 21/02/2013         | SE24H-09A0142    | 2       | 50          | 140                  | 1.29 |
| SC24H            | 18/06/2013         | SC24H-01         | 2       | 51          | 140                  | 1.31 |
|                  | 27/06/2013         | SC24H-02         | 2       | 57          | 140                  | 1.41 |
| C24H             | 08/08/2013         | C24H-01          | 2       | 53          | 140                  | 1.34 |

97 Table 1 legend: BSA = Body surface area; E24H = uninjured sheep treated with extracorporeal life  
 98 support (ECLS) for 24 hours (uninjured/treated); SE24H = sheep with acute smoke-induced lung

99 injury treated with ECLS for 24 hours (injured/treated); SC24H = sheep with acute smoke-induced  
100 lung injury monitored for 24 hours without ECLS (injured/untreated); C24H = sheep subjected to  
101 room air injury as a control for smoke and monitored for 24 hours without ECLS  
102 (placebo/untreated).

## 103 **Experimental procedures**

### 104 **Critical care of animals, VV ECMO setup and physiological data acquisition**

105 The study was performed at the purpose-built Medical Engineering Facility of Queensland  
106 University of Technology (QUT-MERF) at the Prince Charles Hospital Campus of The University of  
107 Queensland as previously described elsewhere [1].

108 The details of animal selection, care, and pre-anaesthetic processes; anaesthesia technique;  
109 airway access and ventilation; instrumentation for VV ECMO; haemodynamic monitoring;  
110 respiratory monitoring; temperature, fluids, vasoactive drug administration, and electrolyte  
111 management; blood collection; physiological data acquisition; and the technique for euthanasia of the  
112 sheep after the experiments have previously been described in a detailed protocol that can be  
113 accessed at <https://www.ncbi.nlm.nih.gov/pmc/articles/PMC3982457/> or doi: 10.1155/2014/468309  
114 [1]. In brief, the sheep was restrained in a sling cage and the ventral neck region was aseptically  
115 prepared to enable intravenous access. For VV ECMO implementation, venous blood was accessed  
116 from the right jugular vein of the animal and then oxygenated and returned to the right atrium of the  
117 heart after it was made to pass through an oxygenator. For the combined purpose of blood sampling,  
118 administration of medications, and fluid administration, a multi-lumen central venous catheter was  
119 inserted into the left jugular vein of the animal under local anaesthesia. The left jugular vein was also  
120 cannulated with an 8G sheath for the insertion of a pulmonary artery catheter for haemodynamic  
121 monitoring. In addition, an 11G sheath catheter was then inserted proximally into the left jugular  
122 vein for intra-cardiac echocardiography catheter insertion. The right jugular vein was cannulated  
123 both proximally and distally with single lumen central lines to aid insertion of return and access  
124 ECMO cannulas, respectively. All animals were intubated and received mechanical ventilation as  
125 previously described [1]. Briefly, the initial ventilator tidal volume was set to approximately 10

126 mL/kg with a respiratory rate of 15 breaths/min, positive end expiratory pressure (PEEP) of 5 cm  
127 H<sub>2</sub>O, and an initial F<sub>i</sub>O<sub>2</sub> (fraction of inspired oxygen) of 1.0. These settings were then titrated based  
128 on arterial blood gas results. A low tidal volume—high PEEP strategy was used to minimise  
129 ventilator-induced lung injury.

130 In order to obtain high-quality cardiorespiratory monitoring data, the instrumentation of the  
131 sheep was undertaken to acquire and derive the following physiological parameters using established  
132 standard methods at defined timepoints: core body temperature (T), pO<sub>2</sub>, SpO<sub>2</sub>, alveolar–arterial  
133 oxygen gradient P(A-a)O<sub>2</sub>, PaO<sub>2</sub>/FiO<sub>2</sub> ratio, end-tidal carbon dioxide concentration (EtCO<sub>2</sub>), heart  
134 rate (HR), arterial blood pressure (BP) (systolic and diastolic), mean arterial BP (MAP), pulmonary  
135 artery pressure (PA) (systolic and diastolic), mean pulmonary artery pressure (MPAP), central  
136 venous pressure (CVP), pulmonary artery occlusion pressure (PAOP), mixed venous oxygen  
137 saturation (SvO<sub>2</sub>), stroke volume (SV), continuous cardiac output (CCO), cardiac index (CI),  
138 systemic vascular resistance (SV), systemic vascular resistance index (SVRI), pulmonary vascular  
139 resistance index (PVRI), left ventricular stroke work index (LVSWI), right ventricular stroke work  
140 index (RVSWI), coronary perfusion pressure (CPP), arterial oxygen content (CaO<sub>2</sub>), and oxygen  
141 delivery index (O<sub>2</sub>EI). (These methods are detailed in data files that can be downloaded at  
142 doi:10.5061/dryad.3r2280gd5.)

143

## 144 **Smoke inhalation injury**

145 In the original study of the ECMO model [4], sheep inhaled standardised cotton smoke  
146 generated by a device that combusts material in an oxygen-deficient environment as previously  
147 described [11]. In brief, 8 g of cotton towelling was combusted in a chamber with transparent walls  
148 and 400 ml tidal volume. One tidal volume breath (approximately 10–12 ml/kg) of the smoke was  
149 delivered to the sheep via plastic tubing that was one m long connected to a tracheostomy tube. A  
150 fixed number (12) of breaths were given with each load of cotton over a period of approximately one  
151 minute. Serial arterial blood gas samples were taken to assess the effect of smoke inhalation,  
152 beginning at a predetermined time point after the smoke breath cycles.

153

## 154 **Physiological data management**

155         Raw data were obtained from critical care monitoring of sheep undergoing treatment for  
156 acute smoke-induced lung injury that involved several separate previous projects. Data analysed  
157 were collected prior to 23 August 2013 and were obtained from two of the scientists (KD and SD –  
158 see Acknowledgements) who developed the base model [4], as part of a research higher-degree  
159 research project of the author at The University of Queensland [12,13]. All data files were stored in  
160 Microsoft® Excel 97–2003 (Microsoft Corporation, Redmond, WA, USA) format and were grouped  
161 per sheep and date of the experiment. Data comprised separate files of real-time physiological data  
162 recorded in the hard drives of the monitoring devices (electronically acquired data) and parameters  
163 manually recorded by those monitoring the sheep under anaesthesia (manually acquired data)—  
164 which included data from the electronic monitoring equipment—as back-up if the electronic  
165 monitors malfunctioned.

166

## 167 **Manually acquired physiological data workflow**

168         A clone of the master manual data entry Excel spreadsheet was created by excluding the  
169 formatting and formulas. Several members of the sheep ECMO research team repeatedly inspected  
170 the data for errors to in order to ensure that all columns, rows, time points, and data points had been  
171 copied correctly, including number formats. Redundant columns were omitted from the spreadsheet  
172 and data were curated and aligned to predetermined experimental time points. While maintaining the  
173 same experimental time point headers on the spreadsheet, data were grouped into the following  
174 categories: ventilator settings, blood pressure and haemodynamics, fluids and urine output, arterial  
175 blood gas values, activated clotting time, anaesthetics, anticoagulants, and ECLS circuit  
176 observations.

177

178



## 179 **Electronically acquired physiological data workflow**

180 Electronically acquired physiologic monitoring raw data were inspected for completeness.  
181 The data comprised 36 time points: ECLS pump time (min); time of day (h); electrocardiograph  
182 (heart rate); arterial blood pressure (mean, systolic, diastolic, heart rate); central venous pressure  
183 (mean); pulmonary artery pressure (mean, systolic, diastolic); oxygenator pressure (pre- and post-);  
184 capnography (end-tidal carbon dioxide (etCO<sub>2</sub>), respiratory rate); pulse oximetry (SpO<sub>2</sub>, heart rate);  
185 ECLS pump (flow rate, speed); ventilator (mode, frequency, oxygen, pressure control, inspiratory  
186 volume, expiratory volume, expiratory minute volume, pressure maximum, mean pressure, positive  
187 end-expiratory pressure, plateau pressure, inspiratory resistance, expiratory pressure, pulmonary  
188 compliance, inspiratory flow); mixed venous oxygen saturation (SvO<sub>2</sub>); and continuous cardiac  
189 output (CCO). A baseline time point was established after instrumentation and an injury time point  
190 corresponding to the smoke inhalation time point was determined thereafter. It is important to note  
191 that there may or may not have been any data at any given point in time. The electronically acquired  
192 physiological monitoring data were inspected for errors and cleaned to provide data for downstream  
193 analysis.

194

## 195 **Respiratory efficiency and haemodynamic monitoring**

196 Manually acquired observations at specifically designated timepoints were recorded and  
197 extracted as detailed in the data filed at doi:10.5061/dryad.3r2280gd5. These timepoints were at  
198 baseline (soon after instrumentation of the sheep), smoke injury, five min post smoke injury, one  
199 hour post smoke injury. This was then followed by ECMO treatment, which was recorded in the  
200 following manner: 0, 0.25, 1, 1.5, 2, 4, 6, 6.5, 7, 8, 10, 12, 14, 16, 18, 20, 22 and 24 hours of ECMO.

201

## 202 **Pre-data analysis checks**

203 Thereafter, data were subjected to further integrity checks. An important step was to make a  
204 plot of data versus time together with descriptive statistics for all data points in the grouped data.

205 After artefact elimination and integrity checks, data for individual sheep were assigned to six  
206 categories: activated clotting time; anaesthetics + inotropes and anticoagulants; arterial blood gas  
207 values; blood pressure + ventilation and haemodynamic data; calculated respiratory + haemodynamic  
208 variables; and fluids and urine production. Using specially written macros, data were extracted from  
209 each experiment and grouped by parameters corresponding to experimental time points. All sheep  
210 treatment data were then filed according to parameter.

211 Data from the 19 sheep from groups E24H, SE24H, C24H and SC24H were processed  
212 further. Data integrity checks were performed again and repeated by several sheep ECMO research  
213 team members. The treatment timeline comprised 22 time points for all experiments in which sheep  
214 received acute smoke-induced lung injury (SE24H). A trend plot and descriptive statistics panel in  
215 Excel were used for data quality control processes for suitability for downstream data analysis and  
216 end-user applications.

217

## 218 **Statistical methods**

219 In order to meet the specific objective of the study, data from the groups, uninjured/treated  
220 and injured/treated groups were analysed. The means, medians and standard deviations of the  
221 weights of the sheep, where applicable, were tabulated and graphically compared. The physiological  
222 parameters of the groups were charted and compared with each other using one-way analysis of  
223 variance (ANOVA), where appropriate. Further, parameters between groups were compared using a  
224 paired two-tailed t-test. All p-values were two-sided and  $p < 0.05$  was considered statistically  
225 significant. All statistical calculations were performed using GraphPad PRISM 6 software (GraphPad  
226 Software, La Jolla, CA, USA).

227

## 228 **Results**

229 The biodata of the sheep that were used in the current analysis are presented in Methods  
230 section (see Table 1). The weights of the uninjured/treated sheep, unlike the injured/treated group,

231 did not pass the D'Agostino–Pearson omnibus normality test; however, there was no significant  
232 difference in the weights of the sheep between the groups (Fig 1).

233

234 **Fig 1. Body weights (Mean  $\pm$  SD) of smoke and non-smoke injured sheep that received**  
235 **extracorporeal life support (ECLS) as compared to those of untreated controls.**

236

## 237 **Mechanical ventilation**

238 A decrease in pulmonary compliance was found in all of the sheep during the course of the  
239 experiments, with the injured/treated (SE24H) animals having the most severe and drastic decrease  
240 followed by the uninjured/treated (E24H), injured/untreated (SC24), and placebo/untreated (C24)  
241 sheep in that order (Fig 2). There was a significant difference ( $p = 0.0013$ ) in pulmonary compliance  
242 between uninjured/treated and injured/treated groups. The injured/treated sheep had consistently  
243 lower SpO<sub>2</sub> compared with the other groups, but there was no significant difference in SpO<sub>2</sub> readings  
244 between the groups (Fig 3). Further, there was an initial increase in etCO<sub>2</sub> followed by a rapid  
245 decrease that reduced 15 minutes after the treatment was began. The etCO<sub>2</sub> of the injured sheep  
246 continued to trend downward and plateaued in the uninjured groups (Fig 4). There was a significant  
247 difference ( $p = 0.0147$ ) in the etCO<sub>2</sub> between the uninjured/treated and injured/treated groups.

248

249 **Fig 2. Pulmonary compliance (Mean  $\pm$  SD) in smoke and non-smoke injured sheep that**  
250 **received extracorporeal life support as compared to that in untreated controls. Dotted lines**  
251 **represent error bar margins.**

252 **Fig 3. Arterial oxyhaemoglobin saturation (SpO<sub>2</sub>) (Mean  $\pm$  SD) in smoke and non-smoke**  
253 **injured sheep that received extracorporeal life support as compared to that in untreated**  
254 **controls.**

255 **Fig 4. End-tidal carbon dioxide tension (etCO<sub>2</sub>) (Mean  $\pm$  SD) in smoke and non-smoke injured**  
256 **sheep that received extracorporeal life support as compared to that in untreated controls.**

257

## 258 **Arterial blood gas evaluation**

259 Blood pH varied between the groups (Fig 5). The placebo/untreated sheep had the highest pH while  
260 the injured/treated group had the lowest. There was a significant difference in pH between the  
261 uninjured/treated and injured/treated groups ( $p = 0.0343$ ). The  $p\text{CO}_2$  in all but the uninjured/treated  
262 sheep increased initially before plummeting sharply, thereby forming a shallow trough corresponding  
263 to one hour after the treatment, followed by a slight increase before stabilising in all sheep (Fig 6).  
264 There was a gradual decrease in  $p\text{O}_2$  in the treated groups of sheep from baseline before decreasing  
265 dramatically at the start of treatment with the injured sheep having the most profound decrease (Fig  
266 7). However, there was no significant difference in  $p\text{O}_2$  between the uninjured/treated and  
267 injured/treated groups.

268 **Fig 5. Arterial blood pH (Mean  $\pm$  SD) over a 24h period in smoke and non-smoke injured**  
269 **sheep that received extracorporeal life support as compared to that in untreated controls.** The  
270 dots represent hourly time-points.

271 **Fig 6. Mean arterial carbon dioxide partial pressure ( $p\text{CO}_2$ ) (Mean  $\pm$  SD) in smoke and non-**  
272 **smoke injured sheep that received extracorporeal life support as compared to that in untreated**  
273 **controls.**

274 **Fig 7. Arterial oxygen tension ( $p\text{O}_2$ ) (Mean  $\pm$  SD with no error bars shown) in smoke and non-**  
275 **smoke injured sheep that received extracorporeal life support as compared to that in untreated**  
276 **controls.**

277

## 278 **Haemoglobin dynamics**

279 The concentration of haemoglobin [Hb] was found to decrease slightly from baseline before  
280 gradually increasing in the injured sheep and remained relatively constant over time in the uninjured  
281 sheep. There was a significant difference in [Hb] between the uninjured/treated and injured/treated ( $p$   
282 = 0.0131) groups (Fig 8). The fraction of oxyhaemoglobin ( $\text{FO}_2\text{Hb}$ ) decreased sharply with the  
283 lowest reading at five minutes post-injury before returning to near baseline levels within an hour of  
284 the treatment (Fig 9). The injured/treated sheep had a considerably deeper trough in  $\text{FO}_2\text{Hb}$  level and

285 there was a significant difference ( $p = 0.046$ ) between troughs. There was no change in FO<sub>2</sub>Hb for  
286 the uninjured sheep. Further, the fraction of carboxyhaemoglobin (FCOHb) increased sharply from  
287 baseline, peaking at approximately five minutes post-injury and decreased sharply thereafter to the  
288 beginning of treatment before gradually returning to near-baseline levels at approximately six hours  
289 after the treatment was begun in the injured sheep (Fig 10). The injured/treated sheep had a higher  
290 peak FCOHb than the injured/untreated sheep, although the difference was not significant. There was  
291 no change in FCOHb for the uninjured sheep. The fraction of methaemoglobin (MetHb) increased  
292 gradually from baseline, peaking at approximately five minutes post-injury and then gradually  
293 decreased when the treatment was begun (Fig 11). This was followed by a gradual return to near-  
294 baseline levels at approximately six hours after the treatment was begun in the injured/treated sheep.  
295 There was no change in MetHb for the uninjured sheep. There was an initial subtle decrease in  
296 calculated haematocrit (Hct) before a steady increase in the injured sheep and relatively flat slopes  
297 for the uninjured sheep (Fig 12).

298

299 **Fig 8. Haemoglobin concentration [Hb] (Mean  $\pm$  SD) in smoke and non-smoke injured sheep**  
300 **that received extracorporeal life support as compared to that in treated controls.**

301 **Fig 9. Fraction of oxyhaemoglobin (FO<sub>2</sub>Hb) (Mean  $\pm$  SD) in smoke and non-smoke injured**  
302 **sheep that received extracorporeal life support as compared to that in untreated controls**

303 **Fig 10. Fraction of carboxyhaemoglobin (FCOHb) (Mean  $\pm$  SD) in smoke and non-smoke**  
304 **injured sheep that received extracorporeal life support as compared to that in untreated**  
305 **controls.**

306 **Fig 11. Fraction of methaemoglobin (FMetHb) (Mean  $\pm$  SD) in smoke and non-smoke injured**  
307 **sheep that received extracorporeal life support as compared to that in untreated controls.**

308 **Fig 12. Calculated haematocrit (Hct) (%) (Mean  $\pm$  SD) in smoke and non-smoke injured sheep**  
309 **that received extracorporeal life support as compared to that in untreated controls.**

310

311

## 312 **Electrolytes**

313           The blood sodium concentration  $[Na^+]$  was relatively stable and there were no significant  
314 differences between groups (Fig 13). There was an initial decrease in the blood calcium  $[Ca^{2+}]$  level,  
315 with the lowest point at approximately one hour after the treatment was begun, before it levelled out  
316 thereafter in all groups (Fig 14). Further, there was a significant difference in  $[Ca^{2+}]$  between the  
317 uninjured/treated and the injured/treated groups ( $p = 0.0001$ ). The placebo/untreated and  
318 injured/treated groups maintained the highest and lowest levels of  $[Ca^{2+}]$ , respectively, throughout  
319 the experiments. Blood chloride  $[Cl^-]$  levels remained stable compared with baseline levels during  
320 the initial stages and then increased gradually thereafter (Fig 15). The blood potassium concentration  
321  $[K^+]$  initially decreased as compared with baseline levels, reaching a minimum concentration one  
322 hour after the treatment was begun and then gradually increased with a peak at approximately 12  
323 hours after treatment was begun in all experimental groups (Fig 16). Although the injured/untreated  
324 and injured/treated sheep had higher  $[K^+]$  than the uninjured sheep, the differences were not  
325 significant. Overall, the anion gap decreased gradually, achieving a relatively gentle slope at  
326 approximately six hours after the treatment was begun and did not change significantly, thereafter  
327 (Fig 17). There was a gradual decrease in anion gap from baseline in the course of the experiments  
328 and there was no significant difference in anion gap between the uninjured/treated and injured/treated  
329 groups.

330

331 **Fig 13. Concentration of sodium ions in blood (Mean  $\pm$  SD) in smoke and non-smoke injured**  
332 **sheep that received extracorporeal life support as compared to that in untreated controls.**

333 **Fig 14. Concentration of calcium ions in blood (Mean  $\pm$  SD) in smoke and non-smoke injured**  
334 **sheep that received extracorporeal life support as compared to that in untreated controls.**

335 **Fig 15. Concentration of chloride ions in blood (Mean  $\pm$  SD) in smoke and non-smoke injured**  
336 **sheep that received extracorporeal life support as compared to that in untreated controls.**

337 **Fig 16. Concentration of potassium ions in blood (Mean  $\pm$  SD, error bars not shown) in smoke**  
338 **and non-smoke injured sheep that received extracorporeal life support as compared to that in**

339 **untreated controls.**

340 **Fig 17. Anion gap (Mean  $\pm$  SD, error bars not shown) in smoke and non-smoke injured sheep**  
341 **that received extracorporeal life support as compared to that in untreated controls.**

342

## 343 **Metabolites**

344 Although there was an increase in blood glucose level [Glu] for the injured/treated sheep after  
345 six hours of treatment, the change was not significant. There was an initial decrease in lactate levels  
346 [Lac] six hours after the treatment was begun, followed by a gradual increase for the injured sheep,  
347 particularly for the injured/treated group. There was no significant difference in [Lac] between the  
348 treated groups.

349 **Fig 18. Blood glucose concentration (Mean  $\pm$  SD) in smoke and non-smoke injured sheep that**  
350 **received extracorporeal life support as compared to that in untreated controls.**

351 **Fig 19. Blood lactate concentration (Mean  $\pm$  SD) in smoke and non-smoke injured sheep that**  
352 **received extracorporeal life support as compared to that in untreated controls.**

353

## 354 **Acid-base balance**

355 There was an increase in the blood base levels [Base (ecf)] that peaked one hour post-  
356 treatment, followed by a gradual decrease in the untreated group. [Base (ecf)] in the treated groups  
357 remained at baseline levels to one hour after the treatment begun, before decreasing markedly in the  
358 injured/treated sheep (Fig 20). There was a significant difference ( $p = 0.0257$ ) in base (ecf) between  
359 the uninjured/treated and injured/treated groups. Further, blood bicarbonate concentrations [ $\text{HCO}_3^-$ ]  
360 increased initially in the untreated groups before decreasing gradually; however, levels remained  
361 higher compared with the treated sheep (Fig 21).

362 **Fig 20. Concentration of base (ecf) in blood (Mean  $\pm$  SD) for smoke and non-smoke injured**  
363 **sheep receiving extracorporeal life support alongside untreated controls.**

364 **Fig 21. Blood bicarbonate concentration (Mean  $\pm$  SD) for smoke and non-smoke injured sheep**  
365 **receiving extracorporeal life support alongside untreated controls.**

366

## 367 **Haemodynamics**

368           There was a gradual decrease in heart rate (HR) of the sheep during the course of the  
369 experiments, with the placebo/untreated groups maintaining a higher HR compared with the  
370 injured/untreated, injured/treated, and uninjured/treated groups early in the experiments (Fig 22).  
371 There was no significant difference in HR between the uninjured/treated and injured/treated groups.  
372 The mean arterial blood pressure (MAP) decreased in the early stages of the experiments before  
373 subsequently increasing gradually, peaking at approximately the time that the treatment begun  
374 before gradually decreasing again in all but the placebo/untreated sheep (Fig 23). The injured/treated  
375 groups had a consistently lower MAP compared with the other groups and there was a significant  
376 difference in MAP ( $p = 0.0058$ ) between the uninjured/treated and injured/treated groups. The mean  
377 pulmonary artery pressure (MPAP) increased gradually, with the injured/treated group having a  
378 consistently higher MPAP (Fig 24). There was no significant difference in MPAP between the  
379 uninjured/treated and injured/treated groups. There was an initial, subtle increase in the central  
380 venous pressure (CVP) that peaked at approximately one hour post-injury followed by a decrease  
381 that stabilised at approximately one hour after the treatment was begun. Further, CVP levels in the  
382 injured/treated and placebo/untreated sheep were consistently higher and lower, respectively, in the  
383 course of the experiments.

384

385 **Fig 22. Composite heart rate (HR) (Mean  $\pm$  SD) in smoke and non-smoke injured sheep that**  
386 **received extracorporeal life support as compared to that in untreated controls.**

387 **Fig 23. Mean arterial blood pressure (MAP) (Mean  $\pm$  SD) in smoke and non-smoke injured**  
388 **sheep that received extracorporeal life support as compared to that in untreated controls.**

389 Dotted lines represent one-sided margins of error bars.

390 **Fig 24. Pulmonary artery pressure (PAP) (Mean  $\pm$  SD, no error bars shown) in smoke and non-**  
391 **smoke injured sheep that received extracorporeal life support as compared to that in untreated**  
392 **controls.**



393 **Fig 25. Mean central venous pressure (CVP) (Mean) in smoke and non-smoke injured sheep**  
394 **that received extracorporeal life support as compared to that in untreated controls.**

395

396 Mixed venous oxygen saturation (SvO<sub>2</sub>) had a lower baseline before eventually rising to a  
397 relatively stable and higher level for the treated sheep, and a slightly lower level for the untreated  
398 sheep (Fig 26). The injured/untreated sheep maintained a consistently lower SvO<sub>2</sub> compared with the  
399 other groups. Except for the placebo/untreated group, there was a decrease in continuous cardiac  
400 output (CCO) from baseline to approximately one hour after the treatment was begun (Fig 27). There  
401 was a significant difference ( $p = 0.0009$ ) in CCO between the uninjured/treated and injured/treated  
402 groups with CCO in the treated groups increasing sharply before plateauing, particularly in the  
403 uninjured/treated group. There was also a subsequent gradual decrease in CCO in the injured/treated  
404 group. Stroke volume (SV) began to increase one hour after the treatment was begun for all groups,  
405 except for the injured/untreated group in which levels remained relatively constant (Fig 28). The SV  
406 in the injured/treated group began to decrease after 6 hours of treatment, while SV in the  
407 uninjured/treated and placebo/untreated sheep increased steadily before decreasing or levelling out  
408 after 12 hours or more of treatment. There were no significant differences in SV between the  
409 injured/untreated and placebo/untreated. The stroke volume index (SVI) began to increase one hour  
410 after the treatment was begun for all groups, except for the injured/untreated group, for which SVI  
411 remained relatively constant (Fig 29). The SVI in the injured/treated group began to decrease after  
412 six hours of treatment while SVI in the uninjured/treated and placebo/untreated groups increased  
413 before subsequently decreasing or levelling out after 12 hours or more of treatment. There were no  
414 significant differences in SVI between groups. While the cardiac index (CI) of the uninjured/treated  
415 and placebo/untreated groups remained relatively close to baseline levels (Fig 30), the CI of the  
416 injured/treated and injured/untreated groups declined gradually over the course of the experiments.

417

418 **Fig 26. Mixed venous oxygen saturation (SvO<sub>2</sub>) (Mean  $\pm$  SD, error bars not shown) in smoke**  
419 **and non-smoke injured sheep that received extracorporeal life support as compared to that in**

420 **untreated controls.**

421 **Fig 27. Continuous cardiac output (CCO) (Mean  $\pm$  SD, error bars not shown) in smoke and**  
422 **non-smoke injured sheep that received extracorporeal life support as compared to that in**  
423 **untreated controls.**

424 **Fig 28. Stroke volume (Mean  $\pm$  SD error bars not shown) in smoke and non-smoke injured**  
425 **sheep that received extracorporeal life support as compared to that in untreated controls.**

426 **Fig 29. Stroke volume index (SVI) (Mean  $\pm$  SD, error bars not shown) in smoke and non-smoke**  
427 **injured sheep that received extracorporeal life support as compared to that in untreated**  
428 **controls.**

429 **Fig 30. Cardiac index (Mean  $\pm$  SD error bars not shown) in smoke and non-smoke injured**  
430 **sheep that received extracorporeal life support as compared to that in untreated controls.**

431

432 After an initial increase in systemic vascular resistance index (SVRI) approximately one hour  
433 after treatment (Fig 31), SVRI began to decrease in all experimental groups before plateauing 12  
434 hours after treatment, followed by a gentle increasing trend until the end of the experiments. The  
435 SVRI in the injured/treated group was consistently below that of the other groups during treatment  
436 while that of the injured/untreated group was correspondingly higher. There was no significant  
437 difference in SVRI between the groups. The pulmonary vascular resistance index (PVRI) remained  
438 close to baseline levels for all of the groups after one hour of treatment while that of the injured  
439 groups progressively increased and that of the uninjured groups remained lower with a subtle  
440 decrease after six hours of treatment (Fig 32). The PVRI in the placebo/untreated sheep remained  
441 close to baseline levels and the lowest throughout the course of the experiment. After a small peak  
442 attained at the beginning of the treatment, the right ventricular stroke work index (RVSWI) in the  
443 uninjured sheep gradually increased while that of the injured sheep decreased (Fig 33). There was a  
444 significant difference ( $p = 0.0196$ ) in the RVSWI gap between the uninjured/treated and  
445 injured/treated groups. RVSWI in the placebo/untreated group remained high while that of the  
446 injured/treated group was consistently the lowest. The left ventricular stroke work index (LVSWI)

447 gradually increased in the uninjured/treated and placebo/untreated groups and plateaued 12 and 18  
448 hours after treatment was begun, respectively, while LVSWI in the injured/untreated and  
449 injured/treated groups of sheep decreased and plateaued at 12 hours after treatment was begun and  
450 trended upward after 18 hours of treatment (Fig 34). LVSWI in the placebo/untreated group  
451 remained consistently higher than in the other groups while that of the injured/treated group was  
452 consistently the lowest.

453 **Fig 31. Systemic vascular resistance index (SVRI) (Mean  $\pm$  SD error bars not shown) in smoke  
454 and non-smoke injured sheep that received extracorporeal life support as compared to that in  
455 untreated controls.**

456 **Fig 32. Pulmonary vascular resistance index (PVRI) (Mean  $\pm$  SD, error bars not shown) in  
457 smoke and non-smoke injured sheep that received extracorporeal life support as compared to  
458 that in controls.**

459 **Fig 33. Right ventricular stroke work index (RVWSI) (Mean  $\pm$  SD, error bars not shown) in  
460 smoke and non-smoke injured sheep that received extracorporeal life support as compared to  
461 that in untreated controls.**

462 **Fig 34. Left ventricular stroke work index (Mean  $\pm$  SD error bars not shown) in smoke and  
463 non-smoke injured sheep that received extracorporeal life support as compared to that in  
464 untreated controls.**

465  
466 Following a decrease in the coronary perfusion pressure (CPP) from baseline in the smoke-  
467 injured sheep, there was a subsequent increase in this parameter within five minutes prior to a  
468 sustained decrease up to 18 hours of treatment, followed by another increase for the subsequent six  
469 hours (Fig 35). There was a significant difference in CPP ( $p = 0.0018$ ) between the uninjured/treated  
470 and injured/treated groups and CCP in the placebo/untreated sheep remained relatively stable after an  
471 initial, subtle increase.

472 **Fig 35. Coronary perfusion pressure (CPP) (Mean  $\pm$  SD, error bars not shown) in smoke and  
473 non-smoke injured sheep that received extracorporeal life support alongside as compared to**

474 **that in controls.**

475

476 There was an initial subtle decrease in arterial oxygen content ( $C_aO_2$ ) from baseline in all  
477 groups before a sustained increase in the injured/untreated group, a steady level in the  
478 placebo/untreated sheep, and a sharp trough in the injured/treated and uninjured/treated groups (Fig  
479 36). Following the trough, the  $C_aO_2$  of the injured/treated group gradually returned to baseline levels  
480 while that of the uninjured/treated group continued along a downward trend. There was a significant  
481 difference ( $p < 0.0085$ ) in  $C_aO_2$  between the uninjured/treated and injured/treated groups.

482

483 **Fig 36. Arterial oxygen content (Mean  $\pm$  SD error bars not shown) in smoke and non-smoke**  
484 **injured sheep that received extracorporeal life support as compared to that in untreated**  
485 **controls.**

486 There was a slight decrease in the oxygen delivery index ( $DO_2I$ ) in all groups one hour after  
487 treatment before a further marked decrease, except for the placebo/untreated sheep (Fig 37). There  
488 was a significant difference ( $p = 0.0013$ ) in  $DO_2I$  between the uninjured/treated and injured/treated  
489 groups. The injured/treated group had the lowest  $DO_2I$  compared with the other groups while the  
490 placebo/untreated sheep maintained the highest  $DO_2I$  profile. The oxygen extraction index ( $O_2EI$ )  
491 decreased in all groups before plateauing after approximately six hours of treatment. Further, there  
492 was a significant difference ( $p = 0.0247$ ) in  $O_2EI$  between the injured/treated and uninjured/treated  
493 groups (Fig 38). The  $O_2EI$  in the injured/treated and injured/untreated groups was consistently lower  
494 and higher, respectively, compared with those of the other groups.

495

496 **Fig 37. Oxygen delivery index ( $DO_2I$ ) (Mean  $\pm$  SD error bars not shown) in smoke and non-**  
497 **smoke injured sheep that received extracorporeal life support as compared to that in untreated**  
498 **controls.**

499 **Fig 38. Oxygen extraction index ( $O_2EI$ ) (Mean  $\pm$  SD error bars not shown) in smoke and non-**  
500 **smoke injured sheep that received extracorporeal life support as compared to that in untreated**

501 **controls.**

502

## 503 **Fluid input and urine output**

504 There was a variation in the volume of intravenous fluids administered to sheep in the  
505 different experimental groups. The injured/treated sheep had the highest fluid requirements, while  
506 the placebo/untreated sheep required the least (Fig 39). There was a significant difference ( $p <$   
507  $0.0001$ ) in fluid requirements between uninjured/treated and injured/treated sheep. The  
508 injured/untreated and injured/treated groups produced the least and most urine on average,  
509 respectively (Fig 40). There was no significant difference in urine output between the  
510 uninjured/treated and injured/treated groups.

511

512 **Fig 39. Total running intravenous fluids per unit body weight (Mean  $\pm$  SD) in smoke and non-**  
513 **smoke injured sheep that received extracorporeal life support as compared to those in**  
514 **untreated controls over a 24h period.**

515 **Fig 40. Urine output (Mean  $\pm$  SD) in smoke and non-smoke injured sheep that received**  
516 **extracorporeal life support as compared to that in untreated controls over a 24h period. Lower**  
517 **and upper bar limits correspond to minimum and maximum urine output, respectively.**

518

## 519 **Anaesthetics**

520 There was a significant difference ( $p < 0.0001$ ) in the amount of alfaxalone required between  
521 the uninjured/treated and injured/treated groups (Fig 41). The uninjured/treated group required more  
522 alfaxalone on average and the injured/untreated group required the least amount on average.  
523 Ketamine requirements differed between groups, with the injured/untreated group requiring the  
524 highest amount on average and the injured/treated group requiring the least (Fig 42). There was no  
525 significant difference in the quantities of ketamine required between the uninjured/treated and  
526 injured/treated groups, but there were significant differences in midazolam requirements (Fig43),  
527 occurred between the uninjured/treated and injured/treated groups ( $p = 0.0067$ ).

528 **Fig 41. Alfaxalone infusion (Mean  $\pm$  SD) indicating the titration range in smoke and non-smoke**  
529 **injured sheep that received extracorporeal life support as compared to that in untreated**  
530 **controls over a 24-hour period.**

531 **Fig 42. Ketamine IV infusion (Mean  $\pm$  SD) indicating the titration range in smoke and non-**  
532 **smoke injured sheep that received extracorporeal life support as compared to that in untreated**  
533 **controls over a 24h period.**

534 **Fig 43. Midazolam IV infusion (Mean  $\pm$  SD) indicating the titration range in smoke and non-**  
535 **smoke injured sheep receiving extracorporeal life support as compared to that in untreated**  
536 **controls over a 24-hour period.**

## 537 **Anticoagulation**

538 There were no significant differences in heparin infusion doses between the uninjured/treated  
539 and injured/treated sheep. Heparin requirements for the placebo/untreated group were the lowest (Fig  
540 44). Activated clotting time increased sharply from baseline during pre-treatment and peaked after  
541 one hour of treatment, before decreasing sharply and plateauing (Fig 45). There were no significant  
542 differences in activated clotting time between groups.

543  
544 **Fig 44. Heparin (10 U/mL) infusion rate (Mean  $\pm$  SD, error bars not shown) in smoke and non-**  
545 **smoke injured sheep that received extracorporeal life support as compared to that in untreated**  
546 **controls.**

547 **Fig 45. Activated clotting time (ACT) (Mean  $\pm$  SD, error bars not shown) in smoke and non-**  
548 **smoke injured sheep that received extracorporeal life support as compared to that in untreated**  
549 **controls.**

550

## 551 **ECLS circuit observations**

552 There were significant differences in the ECLS pump speed (Fig 46), blood flow (Fig 47),  
553 and pressure differential (Fig 48) between the uninjured/treated and injured/treated groups. Further  
554 pump speed, blood flow, and pressure differential were significantly different ( $p = 0.0022$ ), ( $p =$

555 0.0095) and ( $p = 0.0041$ ), respectively between the two groups that received ECLS. These  
556 parameters in the uninjured/treated group were consistently higher than those of the injured/treated  
557 group.

558

559 **Fig 46. Extracorporeal life support pump speed (Mean  $\pm$  SD) for smoke and non-smoke**  
560 **injured sheep that received treatment.**

561 **Fig 47. Blood flow (Mean  $\pm$  SD) through an extracorporeal life support pump for smoke and**  
562 **non-smoke injured sheep that received treatment.**

563 **Fig 48. Pressure differential ( $\Delta$ -p) (Mean  $\pm$  SD) across the extracorporeal life support pump for**  
564 **smoke and non-smoke injured sheep that received treatment**

565

## 566 **Body temperature**

567 Body temperature in the untreated groups gradually increased from baseline levels and  
568 plateaued at approximately after six hours of treatment, and remained higher than that for the treated  
569 groups (Fig 49). There was no significant difference in body temperature between the treated groups.

570

571 **Fig 49. Body temperature (Mean  $\pm$  SD) of smoke and non-smoke injured sheep that received**  
572 **extracorporeal life support as compared to that of untreated controls.**

573

## 574 **Inflammatory cells and cytokines**

575 Data were initially available in abstract form and subsequently as a full publication on inflammatory  
576 cell infiltration into the lung tissue with a trend toward increased lung injury in sheep that inhaled  
577 smoke, revealing damage to the bronchiolar lining and infiltration of inflammatory cells [5,14-16].

578

## 579 **Discussion**

580 The results of this study agree with and confirm earlier preliminary observations that ECLS

581 causes a decrease in pulmonary compliance (Fig 2) over time [12]. It was expected that the injured  
582 sheep would have relatively lower SpO<sub>2</sub> readings (Fig 3) compared with the other groups because of  
583 episodes of hypotension with hypoxemia, which can affect pulse oximeter function [17]. The  
584 relatively low etCO<sub>2</sub> in the injured sheep suggested that the sheep may have hyperventilated (Fig 4),  
585 the causes of which were evaluated with respect to the reactive oxygen species or superoxide  
586 dismutase activity by a team from the source study [18,19].

587 The relatively low blood pH in the injured/treated sheep as depicted in Fig 5, suggested that  
588 the sheep tended to have metabolic acidosis, as the same group of animals also had low etCO<sub>2</sub>. This  
589 also implies that there was no respiratory component that contributed to the observed acidosis. The  
590 low pCO<sub>2</sub> in the uninjured/treated sheep could be a result of hyperventilation and the high pCO<sub>2</sub> in  
591 the injured/untreated sheep suggested that CO<sub>2</sub> clearance was curtailed by injury (Fig 6).

592 The treatment of the sheep contributed to lung injury by causing deterioration of pO<sub>2</sub> (Fig 7).  
593 The low pO<sub>2</sub> translated to a low partial arterial oxygen pressure/inspired oxygen proportion  
594 (PaO<sub>2</sub>/FiO<sub>2</sub> ratio), which was much worse in the injured sheep. This finding showed that ECLS  
595 contributed to the deterioration of the PaO<sub>2</sub>/FiO<sub>2</sub> ratio in the injured/treated group of sheep, a novel  
596 finding that was also unexpected in the primary study (this has since been replicated in a more recent  
597 study[9]). It could also be argued from the data that perhaps VV ECMO was performed in a  
598 suboptimal manner, considering that the sheep oxygenation appeared to be less effective on ECMO  
599 than on the ventilator alone, but this remains to be explored further in future.

600 Further, the relatively higher levels of [Hb] in the injured sheep suggested that these animals  
601 could have been dehydrated as a secondary consequence of excessive fluid loss due to inflammation  
602 and increased vascular permeability [20] despite intravenous fluid replacement (Fig 8). However,  
603 blood total protein and albumin levels, which are better predictors of dehydration in sheep [21], were  
604 not measured.

605 The inverse decrease in FO<sub>2</sub>Hb (Fig 9) relative to FCOHb (Fig 10) following smoke injury  
606 was expected and is a finding that is in agreement with other studies [20,22,23]. It has recently been



607 demonstrated that FCOHb is not correlated to the extent of lung injury [20]. The gradual decrease in  
608 MetHb (Fig 11) was probably caused by the enzymatic activity of methaemoglobin reductase [24]  
609 and the higher Hct observed in the injured sheep (Fig 12) could have been due to dehydration  
610 because Hct was measured by an automated method.

611 As presented in Fig 14, the  $[Ca^{2+}]$  was lower than the published normal level of 2.4 mmol/L  
612 [25]. Stress associated with yarding of the sheep and phosphorus imbalance in feed are the most  
613 likely suggested causes of low  $[Ca^{2+}]$  [26]. Fasting the sheep for 24 hours prior to the experimental  
614 procedures could also have contributed to the relatively low  $[Ca^{2+}]$ .

615 The increase in  $Cl^-$  beyond the normal range of 105–110 mmol/L [25] during the experiments  
616 (Fig 15) suggests that the sheep may have developed respiratory alkalosis. Hyperventilation or  
617 metabolic acidosis resulting from sustained salivary loss of sodium bicarbonate that was more severe  
618 in the injured/treated group may have played a role in hyperchloraemia, because  $Cl^-$  is known to  
619 replace  $HCO_3^-$  when the latter is lost from the body [27,28]. Baseline  $[K^+]$  in all the sheep (Fig 16)  
620 was below the published normal range of 4–5 mmol/L [25] and this relative hypokalaemia may have  
621 been related to low  $K^+$  in the diet [29-31]. The normal anion gap (Fig 17) with decreased  $HCO_3^-$  (Fig  
622 21) confirmed the presence of hyperchloraemic acidosis in all but the placebo/untreated sheep. The  
623 cause of the hyperchloraemia was likely the prolonged administration of 0.9% NaCl.

624 Although normal  $[Glu]$  in ruminants is usually lower than that for other species, its relative  
625 progressive increase in the injured sheep (Fig 18) may have been related to stress and severe pain  
626 associated with injury or the development of enterotoxaemia [32,33]. The relative increase in  $[Lac]$   
627 beyond the reported normal range of 1–2 mmol/L in the injured sheep (Fig 19) suggested  
628 dehydration, trauma, and sepsis [34]. In particular, sepsis is a concern related to the sub-optimal  
629 rumen function, leading to loss of its buffer effect and an increase in the number of anaerobic  
630 bacteria with prolonged hypomotility, such as that which occurs during long-duration anaesthesia.  
631 Therefore, the increases in both  $[Glu]$  and  $[Lac]$  are consistent with severe injury.

632 The elevated Base (ecf) above +2 mmol/L for most of the first 12 hours in the  
633 placebo/untreated and injured/untreated sheep suggested that the sheep were metabolically alkalotic

634 [32] before returning to normal levels (Fig 20). The relatively low Base (ecf) (less than  $-2$  mmol/L)  
635 was consistent with loss of  $\text{HCO}_3^-$  and the tendency of developing metabolic acidosis [32] in the  
636 injured/treated sheep. The marked decrease in  $[\text{HCO}_3^-]$  in the injured sheep was consistent with  
637 metabolic acidosis and was more severe in the injured/treated group, as illustrated in Fig 21, thereby  
638 suggesting that ECLS was a contributing factor.

639 The resting HR of sheep is 50–80 beats/min [25]. In a study that instrumented conscious  
640 sheep, the baseline heart rate was registered as  $106 \pm 9$  beats/min [35]. In the present report, all of the  
641 sheep had a relatively high HR, thereby suggesting that stress and pain were contributing factors (Fig  
642 22). The gradual decrease in HR during the course of the experiments was consistent with the effects  
643 of anaesthesia [25].

644 In sheep, a mean arterial pressure below 60 mmHg indicates inadequate tissue perfusion [25].  
645 Although the MAP values in the injured sheep were lower than for the uninjured sheep (Fig 23),  
646 MAP values were still within the published normal value of 70 mmHg [25]; the magnitude of injury  
647 was again a predictor of how low the MAP was. Another predictor for the severity of the injury was  
648 the mean pulmonary artery pressure, which was highest for the injured/treated sheep as illustrated in  
649 Fig 24. The baseline values for MPAP were higher than the  $17 \pm 1$  mmHg reported in another study  
650 that used sheep for experiments [35]. The baseline CVP in all of the sheep in the present report was  
651  $> 10$  mmHg (Fig 25), which was much higher than the  $5.5 \pm 1.2$  mmHg reported elsewhere [35] in  
652 instrumented conscious sheep and a novel finding in this study. Thus in this study, the severity of  
653 injury and treatment contributed to the CVP elevations found among the sheep.

654 There was a benefit of ECLS treatment for  $\text{SvO}_2$ , as it remained high for both the  
655 injured/treated and uninjured treated groups (Fig 26). The consistently low  $\text{SvO}_2$  in the  
656 injured/untreated group was expected because of the slightly reduced cardiac output in this group;  
657 however, this level of  $\text{SvO}_2$  was still higher than that reported in other studies [35]. Smoke injury was  
658 associated with a sustained decrease in cardiac output in all the sheep that were exposed to smoke.  
659 As in CCO changes (Fig 27), the SV (Fig 28), SVI (Fig 29) and CI (Fig 30) all had similar profiles  
660 for different groups, with the injured sheep having lower values. The decrease in SVRI in all of the

661 sheep at a later stage in the experiments suggested that there was systemic vasodilation (Fig 31). In  
662 contrast, the increase in PVRI in the injured sheep suggested that vasoconstriction was caused by  
663 exposure to smoke injury (Fig 32). The exposure to smoke injury worsened both RVSWI (Fig 33)  
664 and LVSWI (Fig 34) while there was an increase in both parameters in the uninjured sheep. Reduced  
665 RVSWI is associated with poor functioning of the right ventricle [36,37] and LVSWI is a reliable  
666 parameter for left ventricular function [38].

667 The reduction in coronary perfusion pressure in the injured/treated—and to a certain extent  
668 the uninjured/ treated sheep—suggested that ECLS contributed to the decrease in CPP, in addition to  
669 smoke injury (Fig 35). The CPP is an indicator of myocardial perfusion and has been proposed as a  
670 drug target during resuscitation [39]. The observations in the present study support the suggestion  
671 that CPP could be used to predict the severity of injury in sheep.

672 Further, the apparent increase in  $CaO_2$  in the injured sheep (Fig 36) could have been due to  
673 the relative increase in Hb secondary to dehydration as illustrated in Fig 8. The low  $DO_2I$  in the  
674 injured/treated and uninjured/treated groups suggested that ECLS also contributed to this, in addition  
675 to smoke, based on the relatively higher  $DO_2I$  in the injured/untreated sheep (Fig 37). Interestingly,  
676 the  $O_2EI$  (Fig 38) had a comparable profile to that of the  $PaO_2/FiO_2$  ratio and could also be used to  
677 predict the contribution of ECLS to smoke-related injury.

678 The smoke-injured sheep required considerable amounts of intravenous fluids (Fig 39) to  
679 compensate for the losses from pulmonary exudation and inflammation [20,22]. The mean urine  
680 production in all groups (Fig 40) was marginally lower than the published normal of 1.2 mL/kg/h  
681 [25] but still considered to be within the acceptable range for this cohort of sheep. Moreover, the  
682 dosage of anaesthetic drugs used was considered adequate for the experiments (Figs 41, 42 and 43).  
683 In addition, heparin infusion (Fig 44) was indicated to prolong the activated clotting time (Fig 45) in  
684 order to minimise the risk of thrombosis during intravascular procedures [40].

685 The reduction in the ECLS pump speed (Fig 46), flow (Fig 47), and pressure differential (Fig  
686 48) could have resulted from systemic hypotension contributing to low amounts of blood to the  
687 pump. The ECLS was configured such that the centrifugal pump pulled blood from the inferior vena

688 cava and returned it into the right atrium; therefore, if the circulating volume was low, the flow  
689 would decrease for a given pump speed and in this case, both rpm and flow would reduce.  
690 Centrifugal ECLS pumps are known to be preload dependent and afterload sensitive [41], thereby  
691 making rpm and flows directly proportional to each other. The reason for the systemic hypotension  
692 remains undetermined. It is possible that an unknown pulmonary component or product produced in  
693 the smoke-damaged lungs of the sheep played a role. It must be noted that the body temperature of  
694 the sheep was generally within the physiological range (Fig 49).

695         Certain observations regarding this study could affect the interpretation of red blood cell  
696 indices and their derivatives. For example, animals differ from humans in that estimated changes in  
697 plasma volume is preferably determined by changes in packed cell volume (PCV) or haemoglobin  
698 concentration and total plasma protein (TPP) [42-44]. Moreover, in animals, there is a wider range of  
699 normal PCV than TPP [45]. In critical care for domestic animals, the change in both PCV and TPP is  
700 most useful as a crude index of change in plasma volume [46]. A centrifuge that spins minute  
701 amounts of blood for rapid, cost-effective determination of PCV and TPP permits instant adjustments  
702 in an animal's fluid needs. However, measurements of PCV and TPP were not conducted in the  
703 primary study. As with all data that are collected with different objectives, it was considerably  
704 tedious to align certain time points with real-time observations made in the laboratory, particularly  
705 for data that was manually input. There was also no information regarding pre-anaesthetic blood  
706 tests.

707         An additional limitation of this study is related to the overall objective of providing useful  
708 information relevant to the sheep ECMO model in particular, and to the scientific community  
709 interested in large animal experimentation and veterinary medicine in general. Because the method  
710 of data collection method has not been validated across several laboratories or research groups, it is  
711 considered relatively preliminary and further validation studies are required. Moreover, the number  
712 of sheep (Fig 1) was low and this was particularly so in the injured/untreated and placebo/untreated  
713 groups, thereby preventing comparisons between the treated and untreated sheep. A further limitation  
714 is that cytokine levels, as predictors of lung injury, were not quantified. Using ELISA assays to

715 quantify cytokine levels proved difficult and the cost was prohibitive in the present study, although  
716 subsequent efforts were made by a few members of the original research group in this regard [5]. It is  
717 partially for this reason that pioneering studies [47] have been proposed for the development of  
718 proteogenomic assays as an alternative to ELISA—to learn from circulating markers of acute  
719 inflammation in injured sheep used as models of intensive care, to understand critical illness.

720 Nevertheless, although ECMO treatment has been demonstrated to contribute to, and  
721 exacerbate the deterioration of pulmonary pathology by reducing lung compliance and  $\text{PaO}_2/\text{FiO}_2$   
722 ratio in sheep studies [5,9,15], the understanding of ECMO in respiratory life-support in human  
723 medicine continues to grow in a positive direction overall; moreover, there is evidence that it is  
724 useful as a life-saving treatment. These novel observations from sheep could help in understanding  
725 similar pathology such as that which occurs in animal victims of smoke inhalation from house or  
726 bush fires, aspiration pneumonia secondary to tick paralysis, and in the management of COVID-19 in  
727 humans [48-50].

728 The World Health Organisation (WHO) has recently recognised and classified a novel  
729 coronavirus SARS-CoV-2 that causes COVID-19 as a global pandemic and public health emergency  
730 [51,52]. The National Institute of Allergy and Infectious Disease (NIAID) of the United States of  
731 America recognises that coronaviruses constitute a large group of viruses known to cause respiratory  
732 diseases, including the common cold [53]. However, in recent years, three novel members of this  
733 family of viruses have arisen from animals to cause severe and extensive infection and death in  
734 humans [54]. In addition to bats, a large number of coronaviruses are known to circulate in certain  
735 domestic animals like cats and occasionally spill over to humans and cause serious illnesses, such as  
736 the SARS coronavirus (SARS-CoV) that emerged in Southern China in 2002 [55]. As a future  
737 perspective, the outcomes of the present study could be used to guide additional studies to enable the  
738 mortality indicators and prognostic indicators associated with ECMO and allied technology to be  
739 further evaluated and well understood in sheep and other experimental animals.

740

741

## 742 **Conclusions**

743 The results of this study demonstrated that ECLS contributed to the worsening of pulmonary  
744 pathology by reducing lung compliance and PaO<sub>2</sub>/FiO<sub>2</sub> ratio. The O<sub>2</sub>EI changes mirrored those of the  
745 PaO<sub>2</sub>/FiO<sub>2</sub> ratio and decreasing CPP was a predictor of a greater magnitude of cardiopulmonary  
746 injury in sheep. These novel observations could help in further understanding similar pathology in  
747 other patients; for example, in the resuscitation of animals injured from in house or bush fires. A  
748 similar data acquisition approach could be used in evaluating the effectiveness of a given  
749 experimental or clinical intervention to further the understanding of the clinical condition being  
750 studied and to aid in the formulation of treatments aimed at improving the survival of animal  
751 patients. In veterinary medicine, albeit now a considerably expensive and remote option, ECLS  
752 knowledge could complement the treatment of potentially reversible aspiration pneumonia, a  
753 secondary complication associated with both *Ixodes holocyclus* toxicity and laryngeal paralysis, in  
754 valuable companion animals and in critically ill humans who require respiratory support, like  
755 COVID-19 patients.

756

## 757 **Competing interests**

758 A previously undisclosed conflict of interest became apparent from a section of adjunct persons  
759 within the research group when important early findings of this paper were first presented at an  
760 academic milestone seminar at The University of Queensland in August 2013. Therefore, this report  
761 comprises work completed during studies for higher-degree research from 7<sup>th</sup> September 2012 to 23<sup>rd</sup>  
762 August 2013, only.

763

## 764 **Author Contributions**

765 The author (SC) was solely responsible for the study design, writing the manuscript, analysing and  
766 interpreting the data, and final approval of the manuscript. In addition, SC is fully accountable for the  
767 work.

## 768 **Acknowledgements**

769 This study was funded by an Australian Postgraduate Award (APA) scholarship through the  
770 University of Queensland for studies for higher-degree research. Even though the original data  
771 collection was funded by the National Health and Medical Research Council (NHMRC), this  
772 research was not part of the NHMRC-funded project. It was conducted at Queensland University of  
773 Technology Medical Engineering Research Facility (QUT-MERF). Gratitude is extended to Dunster  
774 KR, Diab S and Platts D for considerable assistance in the animal laboratory and sharing data, as  
775 well as Passmore M, McDonald C, Simonova G, Foley S, Hayes R, Shekar K, Fung Y, and Fraser JF  
776 for their various roles as members of the sheep ECMO research team. Gratitude is also extended to  
777 Tung J-P for the initial advice on data handling and the staff at QUT-MERF for assistance in the care  
778 of the sheep. The author is also thankful to Dr. Jane Charbonneau and SCRIBENDI for editorial  
779 support.



## 780 **References**

- 781 1. Chemonges S, Shekar K, Tung JP, Dunster KR, Diab S, et al. Optimal management of the critically ill:  
782 anaesthesia, monitoring, data capture, and point-of-care technological practices in ovine models of  
783 critical care. *Biomed Res Int*. 2014;468309.
- 784 2. Platts DG, Fraser JF, Hilton A, Diab S, McDonald C, et al. A novel echocardiographic imaging technique,  
785 intracatheter echocardiography, to guide veno-venous extracorporeal membrane oxygenation  
786 cannulae placement in a validated ovine model. *Intensive Care Medicine Experimental*. 2014;2:2.
- 787 3. Platts DG, Diab S, Dunster KR, Shekar K, Burstow DJ, et al. Feasibility of perflutren microsphere contrast  
788 transthoracic echocardiography in the visualization of ventricular endocardium during venovenous  
789 extracorporeal membrane oxygenation in a validated ovine model. *Echocardiography*. 2015;32:548-  
790 56.
- 791 4. Shekar K, Fung YL, Diab S, Mullany DV, McDonald CI, et al. Development of simulated and ovine models  
792 of extracorporeal life support to improve understanding of circuit-host interactions. *Crit Care Resusc*.  
793 2012;14:105-111.
- 794 5. Passmore MR, Fung YL, Simonova G, Foley SR, Dunster KR, et al. Inflammation and lung injury in an  
795 ovine model of extracorporeal membrane oxygenation support. *Am J Physiol Lung Cell Mol Physiol*.  
796 2016;311:L1202-L1212.
- 797 6. Rais-Bahrami K, Van Meurs KP. Venoarterial versus venovenous ECMO for neonatal respiratory failure.  
798 *Seminars in Perinatology*. 2014;38:71-77.
- 799 7. Brenner P, Zelger T, Kainzinger S, Sodian R, Überfuhr P, et al. Prolonged extracorporeal membrane  
800 oxygenation (ECMO) in 231 patients after different indications with low cardiac output—a single-  
801 center experience. *The Thoracic and Cardiovascular Surgeon*. 2012;60:V23.
- 802 8. Fraser JF, Platts DG, Mullany DV, Fung YL, Shekar K, et al. ECMO—the clinician’s view. *ISBT Science*  
803 *Series*. 2012;7:82-88.
- 804 9. Millar JE, Bartnikowski N, Passmore MR, Obonyo NG, Malfertheiner MV, et al. Combined mesenchymal  
805 stromal cell therapy and ECMO in ARDS: a controlled experimental study in sheep. *Am J Respir Crit*  
806 *Care Med*. 2020
- 807 10. NHMRC. Australian code of practice for the care and use of animals for scientific purposes. Canberra,  
808 Australia: NHMRC; 2013.
- 809 11. Riedel T, Fraser JF, Dunster K, Fitzgibbon J, Schibler A. Effect of smoke inhalation on viscoelastic  
810 properties and ventilation distribution in sheep. *Journal of Applied Physiology*. 2006;101:763-70.
- 811 12. Chemonges S. Critical care management of sheep receiving extra-corporeal membrane oxygenation due



- 812 to smoke induced acute lung injury (ECMO S-ALI) and acute sepsis. Australian and New Zealand  
813 College of Veterinary Scientists: College Science Week. Surfers Paradise, Australia: ANZCVS; 2013.
- 814 13. Chemonges S. Contemporary data capture, anaesthesia monitoring and point-of-care technology in critical  
815 care research settings for animal models. Australian and New Zealand College of Veterinary  
816 Scientists: College Science Week. Surfers Paradise, Australia: ANZCVS; 2013.
- 817 14. Margaret Passmore LF, Dunster K, Chemonges S, Diab S, Minchinton R, Shekar K, Fraser J. ECMO  
818 contributes to lung injury in an ovine model of veno-venous ECMO. ANZICS/ACCCN Intensive Care  
819 Annual Scientific Meeting (ASM). Hotel Grand Chancellor Hobart; 2013.
- 820 15. Margaret Passmore LF, Dunster K, Chemonges S, Diab S, Minchinton R, Shekar K, Fraser J. ECMO  
821 contributes to lung injury in an ovine model of veno-venous ECMO; ; Beijing, China; 2013.
- 822 16. Margaret P, Yoke LF, Kimble RD, Sara D, Kiran S, et al. Lung inflammatory changes in an ovine model of  
823 venovenous extracorporeal membrane oxygenation. B47 Acute Respiratory Distress Syndrome:  
824 American Thoracic Society. 2014;A3064-A3064.
- 825 17. Quinn CT, Raisis AL, Musk GC. Evaluation of masimo signal extraction technology pulse oximetry in  
826 anaesthetized pregnant sheep. *Veterinary Anaesthesia and Analgesia*. 2013; 40: 149-56.
- 827 18. McDonald CI, Fung YL, Fraser JF. Antioxidant trace element reduction in an in vitro cardiopulmonary  
828 bypass circuit. *ASAIO Journal*. 2012;58:217-22.
- 829 19. McDonald CI, Fung YL, Shekar K, Diab SD, Dunster KR, et al. The impact of acute lung injury, ECMO and  
830 transfusion on oxidative stress and plasma selenium levels in an ovine model. *Journal of Trace  
831 Elements in Medicine and Biology*. 2015;30:4-10.
- 832 20. Lange M, Cox RA, Traber DL, Hamahata A, Nakano Y, et al. No correlation between initial arterial  
833 carboxyhemoglobin level and degree of lung injury following ovine burn and smoke inhalation.  
834 *Experimental Lung Research*. 2014;40:99.
- 835 21. Combs MDA, Rendell D, Reed KFM, Mace WJ, Quinn JC. Evidence of dehydration and electrolyte  
836 disturbances in cases of perennial ryegrass toxicosis in Australian sheep. *Australian Veterinary  
837 Journal*. 2014;92:107-13.
- 838 22. Westphal M, Morita N, Enkhbaatar P, Murakami K, Traber DL, et al. Carboxyhemoglobin formation  
839 following smoke inhalation injury in sheep is interrelated with pulmonary shunt fraction. *Biochemical  
840 and Biophysical Research Communications*. 2003;311:754-58.
- 841 23. Westphal M, Murakami K, Burke AS, Westphal-Varghese BB, Rudloff HE, et al. Combined burn and  
842 smoke inhalation injury impairs ovine hypoxic pulmonary vasoconstriction. *Critical Care Medicine*.  
843 2006;34:1428-36.
- 844 24. Bradberry S. Methaemoglobinaemia. *Medicine*. 2007;35:552-53.

- 845 25. Adams D, McKinley M, Colditz I, Dart C. The sheep. Australian and New Zealand Council for the Care of  
846 Animals in Research & Teaching (ANZCCART) Humane Science. The University of Adelaide:  
847 Australian and New Zealand Council for the Care of Animals in Research & Teaching; 2009.
- 848 26. McGrath SR, Lievaart JJ, Friend MA. Extent of utilisation of dual-purpose wheat for grazing by late-  
849 pregnant and lambing ewes and producer-reported incidence of health issues in southern New South  
850 Wales. *Australian Veterinary Journal*. 2013; 91:432-36.
- 851 27. Handy JM, Soni N Physiological effects of hyperchloraemia and acidosis. *British Journal of Anaesthesia*.  
852 2008;101:141-50.
- 853 28. Peacock RE, Smart L. False hyperchloraemia in a dog secondary to ingestion of horse feed supplemented  
854 with potassium bromide. *Australian Veterinary Journal*. 2013;91:320-22.
- 855 29. Duhm J, Göbel BO. Na<sup>+</sup>-K<sup>+</sup> transport and volume of rat erythrocytes under dietary K<sup>+</sup> deficiency. *The*  
856 *American Journal of Physiology*. 1984;246:C20-29.
- 857 30. Mien TXN, Li EY, Nicholas KF, Donna HL, Hetal K, et al. Effects of K<sup>+</sup>-deficient diets with and without  
858 NaCl supplementation on Na<sup>+</sup>, K<sup>+</sup>, and H<sub>2</sub>O transporters' abundance along the nephron. *American*  
859 *Journal of Physiology—Renal Physiology*. 2012;303:92-104.
- 860 31. Oh YT, Kim J, Youn JH. Role of pituitary in K<sup>+</sup> homeostasis: impaired renal responses to altered K<sup>+</sup> intake  
861 in hypophysectomized rats. *American Journal of Physiology Regulatory, Integrative and Comparative*  
862 *Physiology*. 2013;304:R1166-74.
- 863 32. Russell KE, Roussel AJ. Evaluation of the ruminant serum chemistry profile. *Veterinary Clinics of North*  
864 *America: Food Animal Practice*. 2007;23:403-26.
- 865 33. Sejrsen K, Hvelplund T, Nielsen MO. Ruminant physiology: digestion, metabolism and impact of nutrition  
866 on gene expression, immunology and stress. Wageningen: Wageningen Academic Publishers; 2006.
- 867 34. Ewaschuk JB, Naylor JM, Zello GA D-lactate in human and ruminant metabolism. *J Nutr*. 2005;135:1619-  
868 25.
- 869 35. Pohlmann JR, Akay B, Camboni D, Koch KL, Mervak BM, et al. A low mortality model of chronic  
870 pulmonary hypertension in sheep. *The Journal of Surgical Research*. 2012;175:44-8.
- 871 36. Frea S, Bovolo V, Bergerone S, D'Ascenzo F, Antolini M, et al. Echocardiographic evaluation of right  
872 ventricular stroke work index in advanced heart failure: a new index? *Journal of Cardiac Failure*.  
873 2012;18:886-93.
- 874 37. Cameli M, Bernazzali S, Lisi M, Tsioulpas C, Crocchia MG, et al. Right ventricular longitudinal strain and  
875 right ventricular stroke work index in patients with severe heart failure: left ventricular assist device  
876 suitability for transplant candidates. *Transplantation Proceedings*. 2012;44:2013.
- 877 38. Choi J-O, Park SW, Park PW, Lee S-C, Choi SH, et al. Noninvasive assessment of left ventricular stroke

- 878 work index in patients with severe mitral regurgitation: correlation with invasive measurement and  
879 exercise capacity. *Echocardiography* (Mount Kisco, NY). 2010;27:1161.
- 880 39. Raghunathan K, Barbeito A, MacLeod D. Goal-directed advanced cardiac life support: coronary perfusion  
881 pressure as a target during resuscitation. *Critical Care Medicine*. 2013;41:2817-18.
- 882 40. Oliver WC. Anticoagulation and coagulation management for ECMO. *Seminars in Cardiothoracic and*  
883 *Vascular Anaesthesia*. 2009;13:154-75.
- 884 41. Jayanthkumar HS, Murugesan C, Rajkumar J, Harish BR, Muralidhar K. Our experience with implantation  
885 of VentrAssist left ventricular assist device. *Indian J Anaesth*. 2013;57:56-61.
- 886 42. Falzon LC, Menzies PI, Shakya KP, Jones-Bitton A, Vanleeuwen J, et al. A longitudinal study on the effect  
887 of lambing season on the periparturient egg rise in Ontario sheep flocks. *Preventive Veterinary*  
888 *Medicine*. 2013;110:467-80.
- 889 43. Hayes GM, Mathews K, Floras A, Dewey C. Refractometric total plasma protein measurement as a cage-  
890 side indicator of hypoalbuminemia and hypoproteinemia in hospitalized dogs. *Journal of Veterinary*  
891 *Emergency and Critical Care*. 2011;21:356-62.
- 892 44. White A, Reyes A, Godoy A, Martínez R. Effects of transport and racing on ionic changes in thoroughbred  
893 race horses. *Comparative Biochemistry and Physiology—Part A: Physiology*. 1991;99:343-46.
- 894 45. Tang Z, Lee JH, Louie RF, Kost GJ. Effects of different hematocrit levels on glucose measurements with  
895 handheld meters for point-of-care testing. *Archives of pathology & laboratory medicine*. 2000;124:  
896 1135-40.
- 897 46. Stafford KJ, Mellor DJ, Todd SE, Gregory NG, Bruce RA, et al. The physical state and plasma biochemical  
898 profile of young calves on arrival at a slaughter plant. *New Zealand Veterinary Journal*. 2001;49:142-  
899 42.
- 900 47. Chemonges S, Tung JP, Fraser JF. Proteogenomics of selective susceptibility to endotoxin using  
901 circulating acute phase biomarkers and bioassay development in sheep: a review. *Proteome Sci*.  
902 2014;12:12.
- 903 48. Jacobs JP, Stammers AH, St Louis J, Hayanga JWA, Firstenberg MS, et al. Extracorporeal membrane  
904 oxygenation in the treatment of severe pulmonary and cardiac compromise in COVID-19: Experience  
905 with 32 patients. *ASAIO J*; 2020.
- 906 49. Ramanathan K, Antognini D, Combes A, Paden M, Zakhary B, et al. Planning and provision of ECMO  
907 services for severe ARDS during the COVID-19 pandemic and other outbreaks of emerging infectious  
908 diseases. *Lancet Respir Med*. 2020;8:518-26.
- 909 50. Rajagopal K, Keller SP, Akkanti B, Bime C, Loyalka P, et al. Advanced pulmonary and cardiac support of  
910 COVID-19 patients: Emerging recommendations from ASAIO-A "Living Working Document". *ASAIO*

- 911 J;2020.
- 912 51. Sohrabi C, Alsafi Z, O'Neill N, Khan M, Kerwan A, et al. World Health Organization declares global  
913 emergency: A review of the 2019 novel coronavirus (COVID-19). *Int J Surg.* 2020;76:71-6.
- 914 52. Rothan HA, Byrareddy SN. The epidemiology and pathogenesis of coronavirus disease (COVID-19)  
915 outbreak. *J Autoimmun.* 2020;109:26.
- 916 53. NIAID Coronaviruses; 2020.
- 917 54. Chen Y, Liu Q, Guo D. Emerging coronaviruses: genome structure, replication, and pathogenesis. *J Med*  
918 *Virol.* 2020;92:418-423.
- 919 55. Chan JF, To KK, Tse H, Jin DY, Yuen KY. Interspecies transmission and emergence of novel viruses:  
920 lessons from bats and birds. *Trends Microbiol.* 2013;21:544-55.
- 921

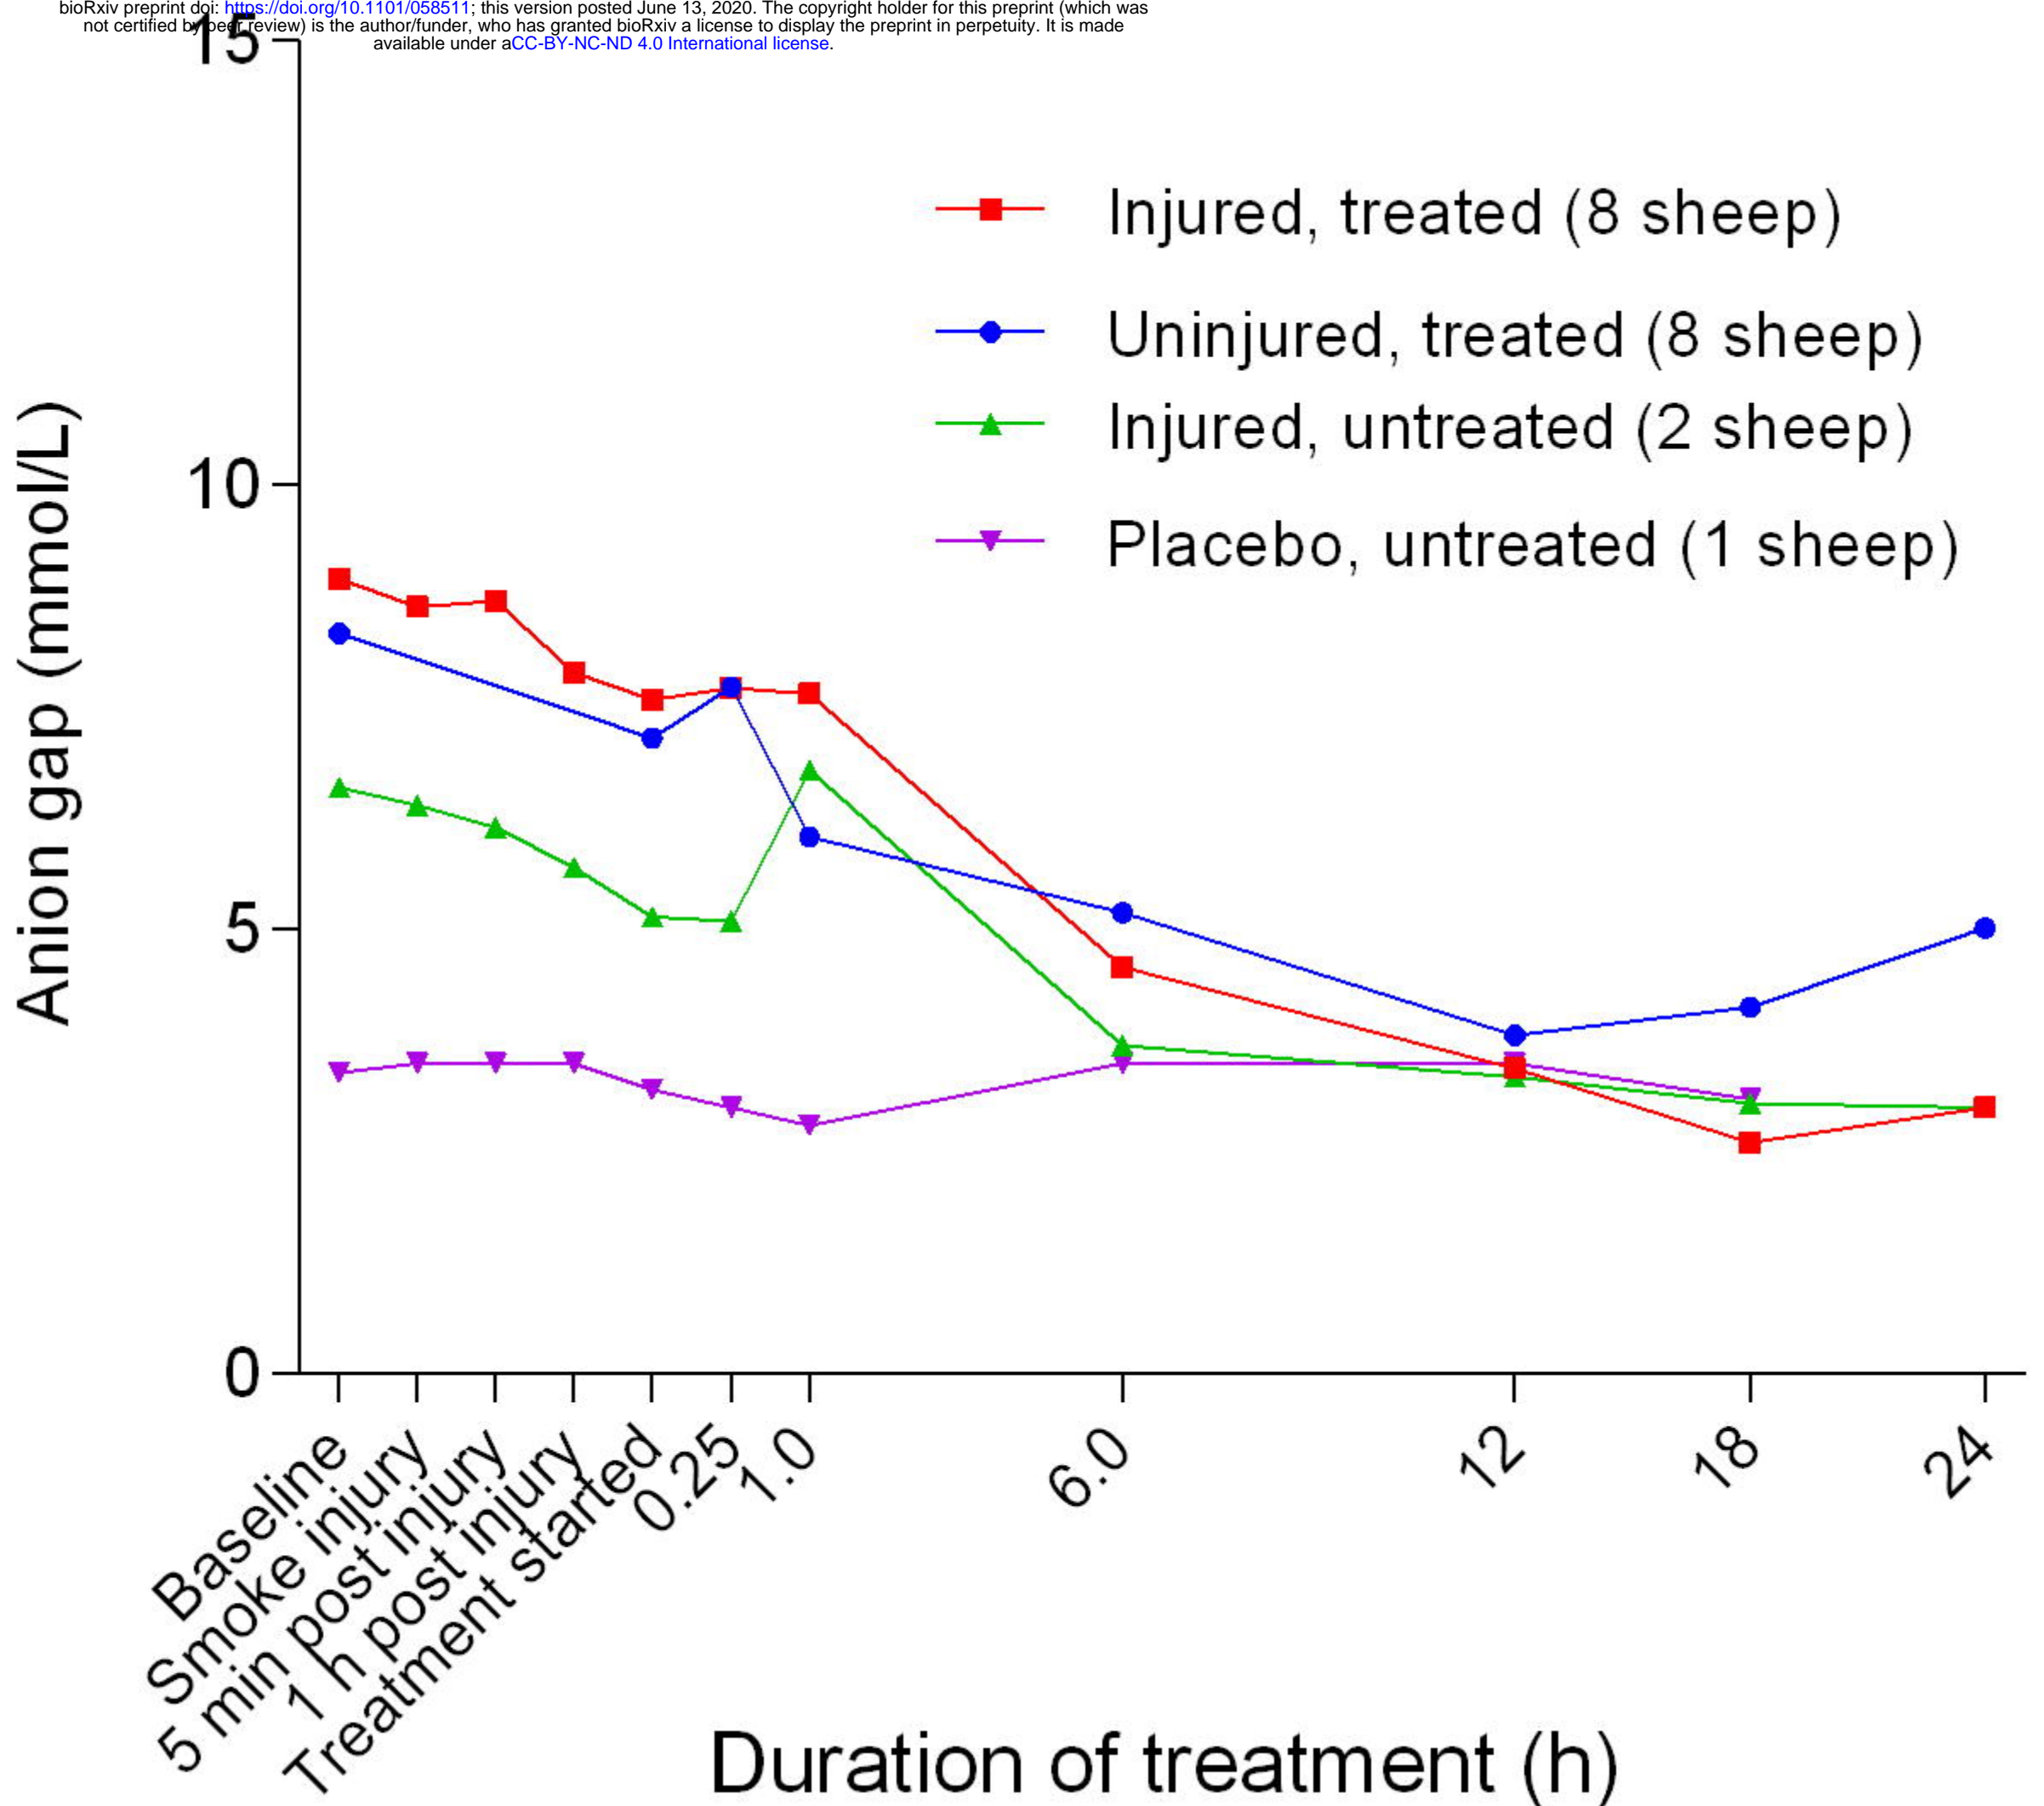



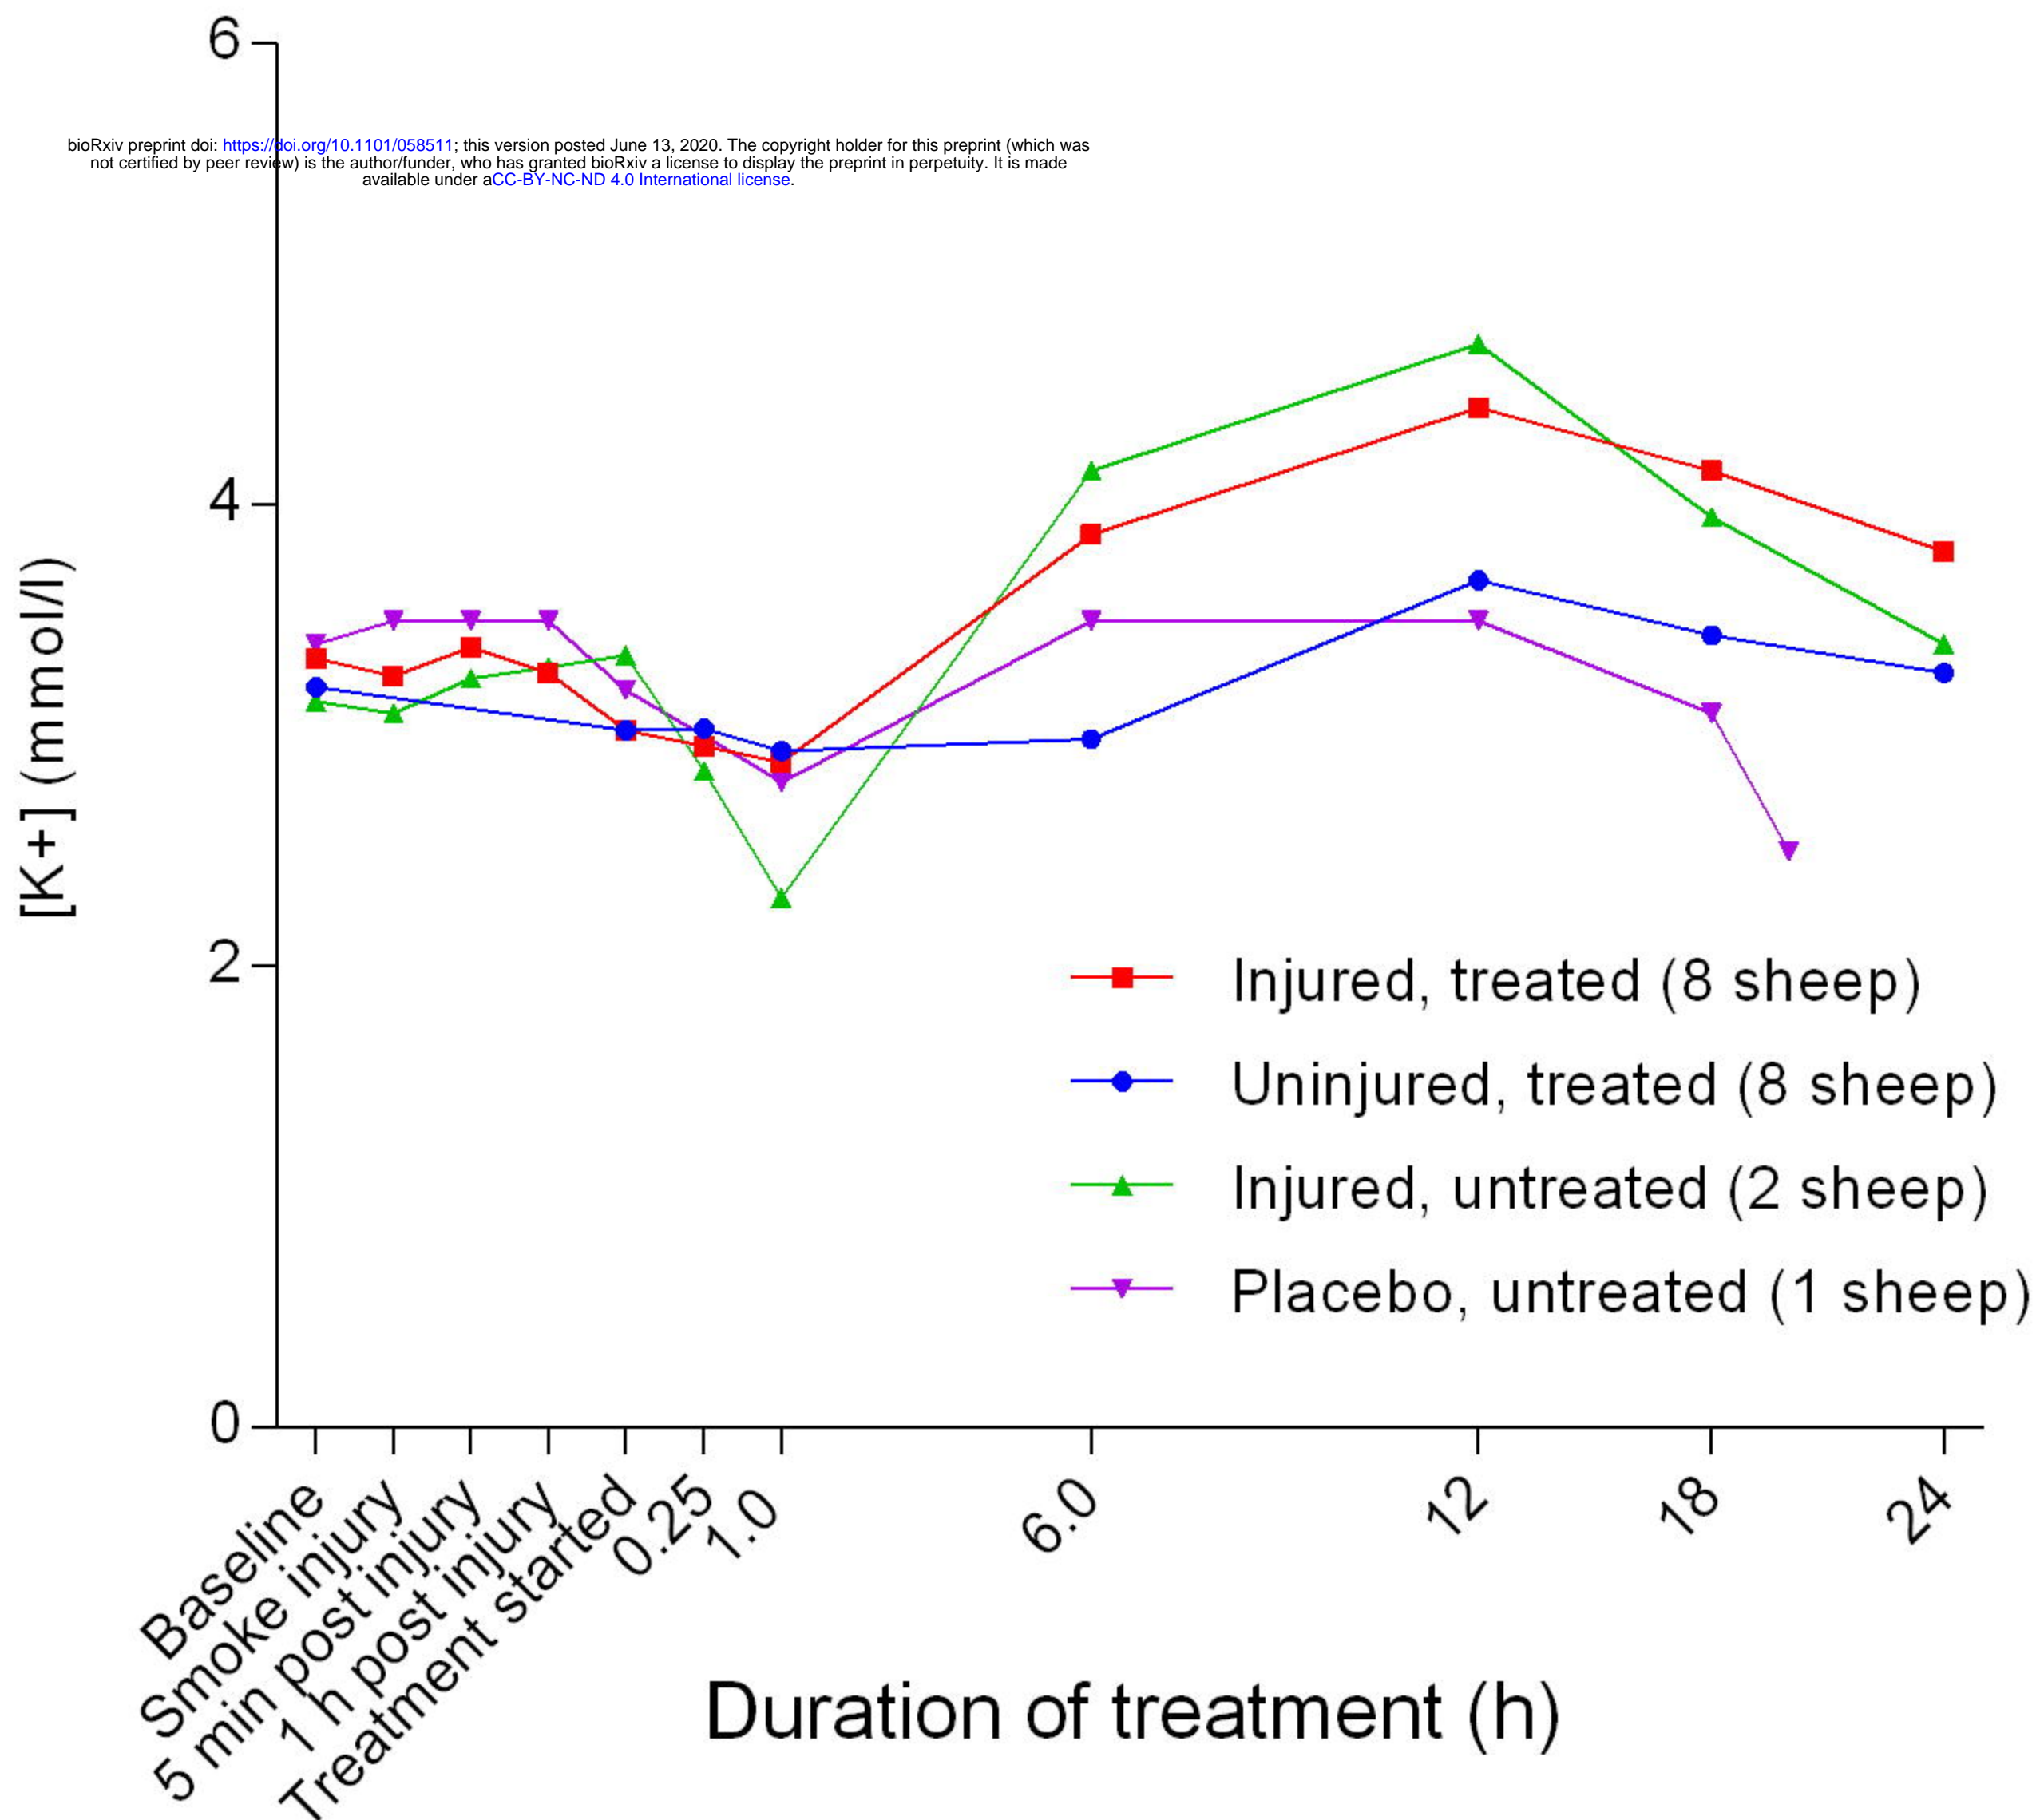

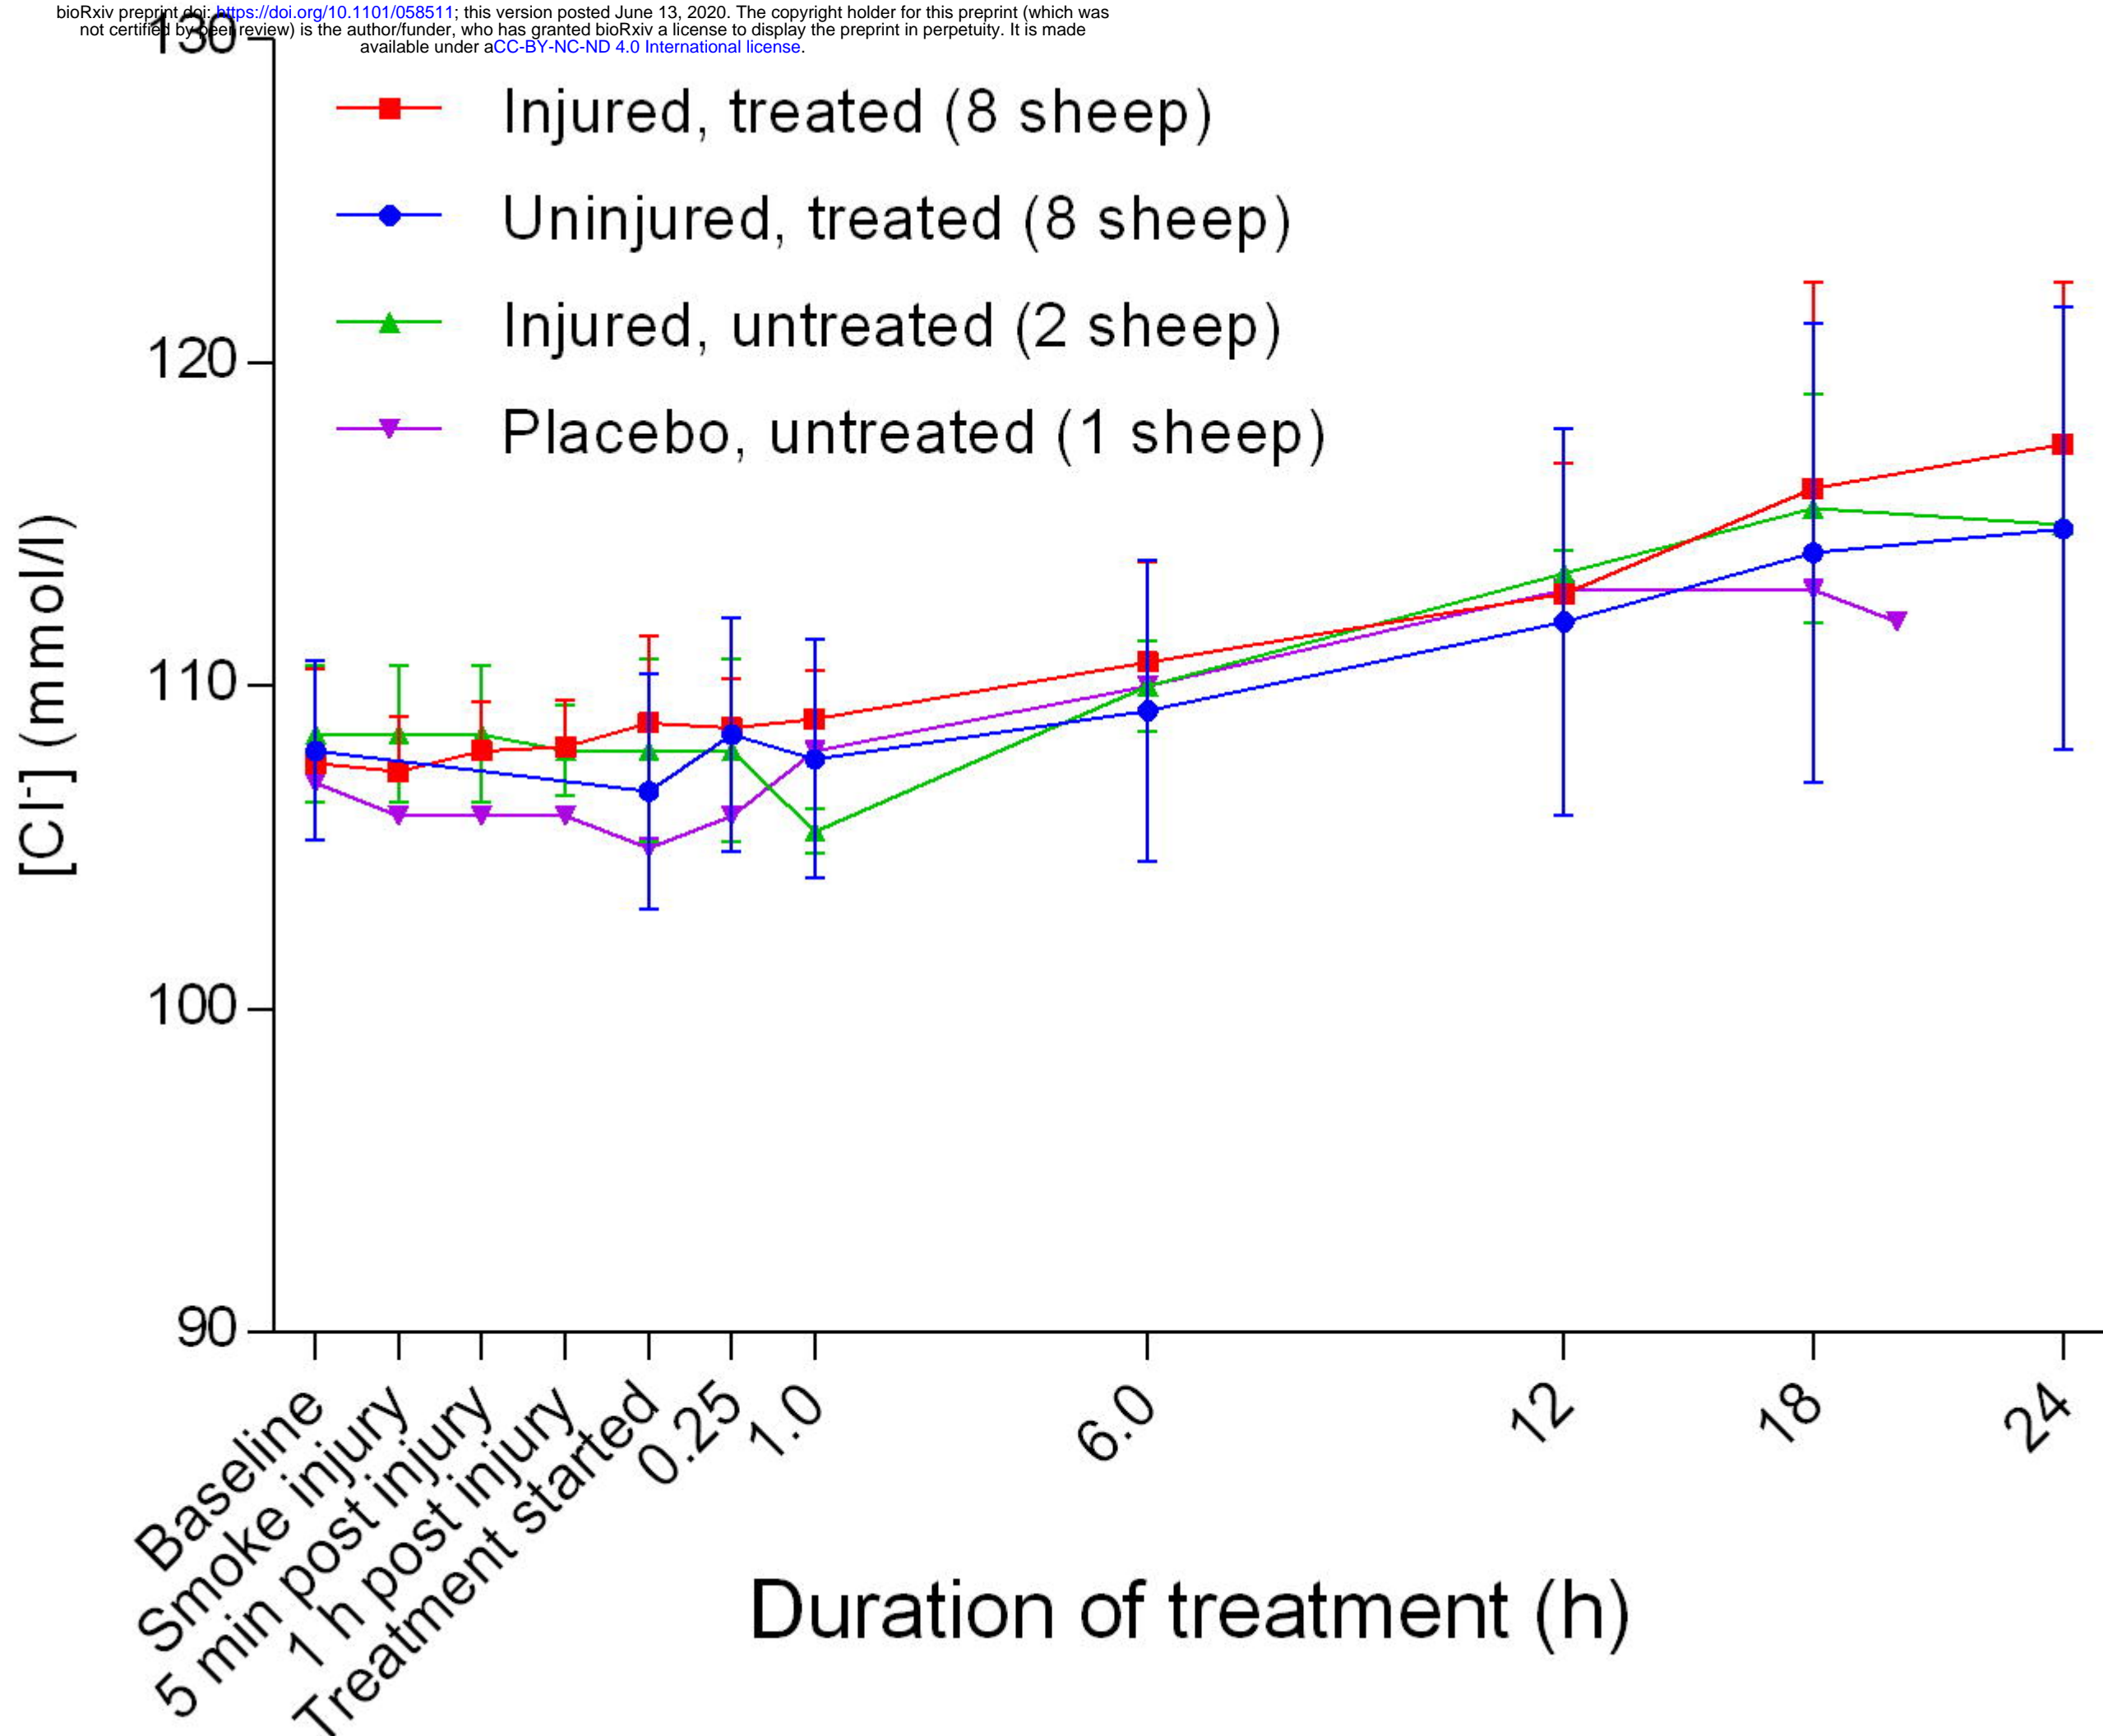

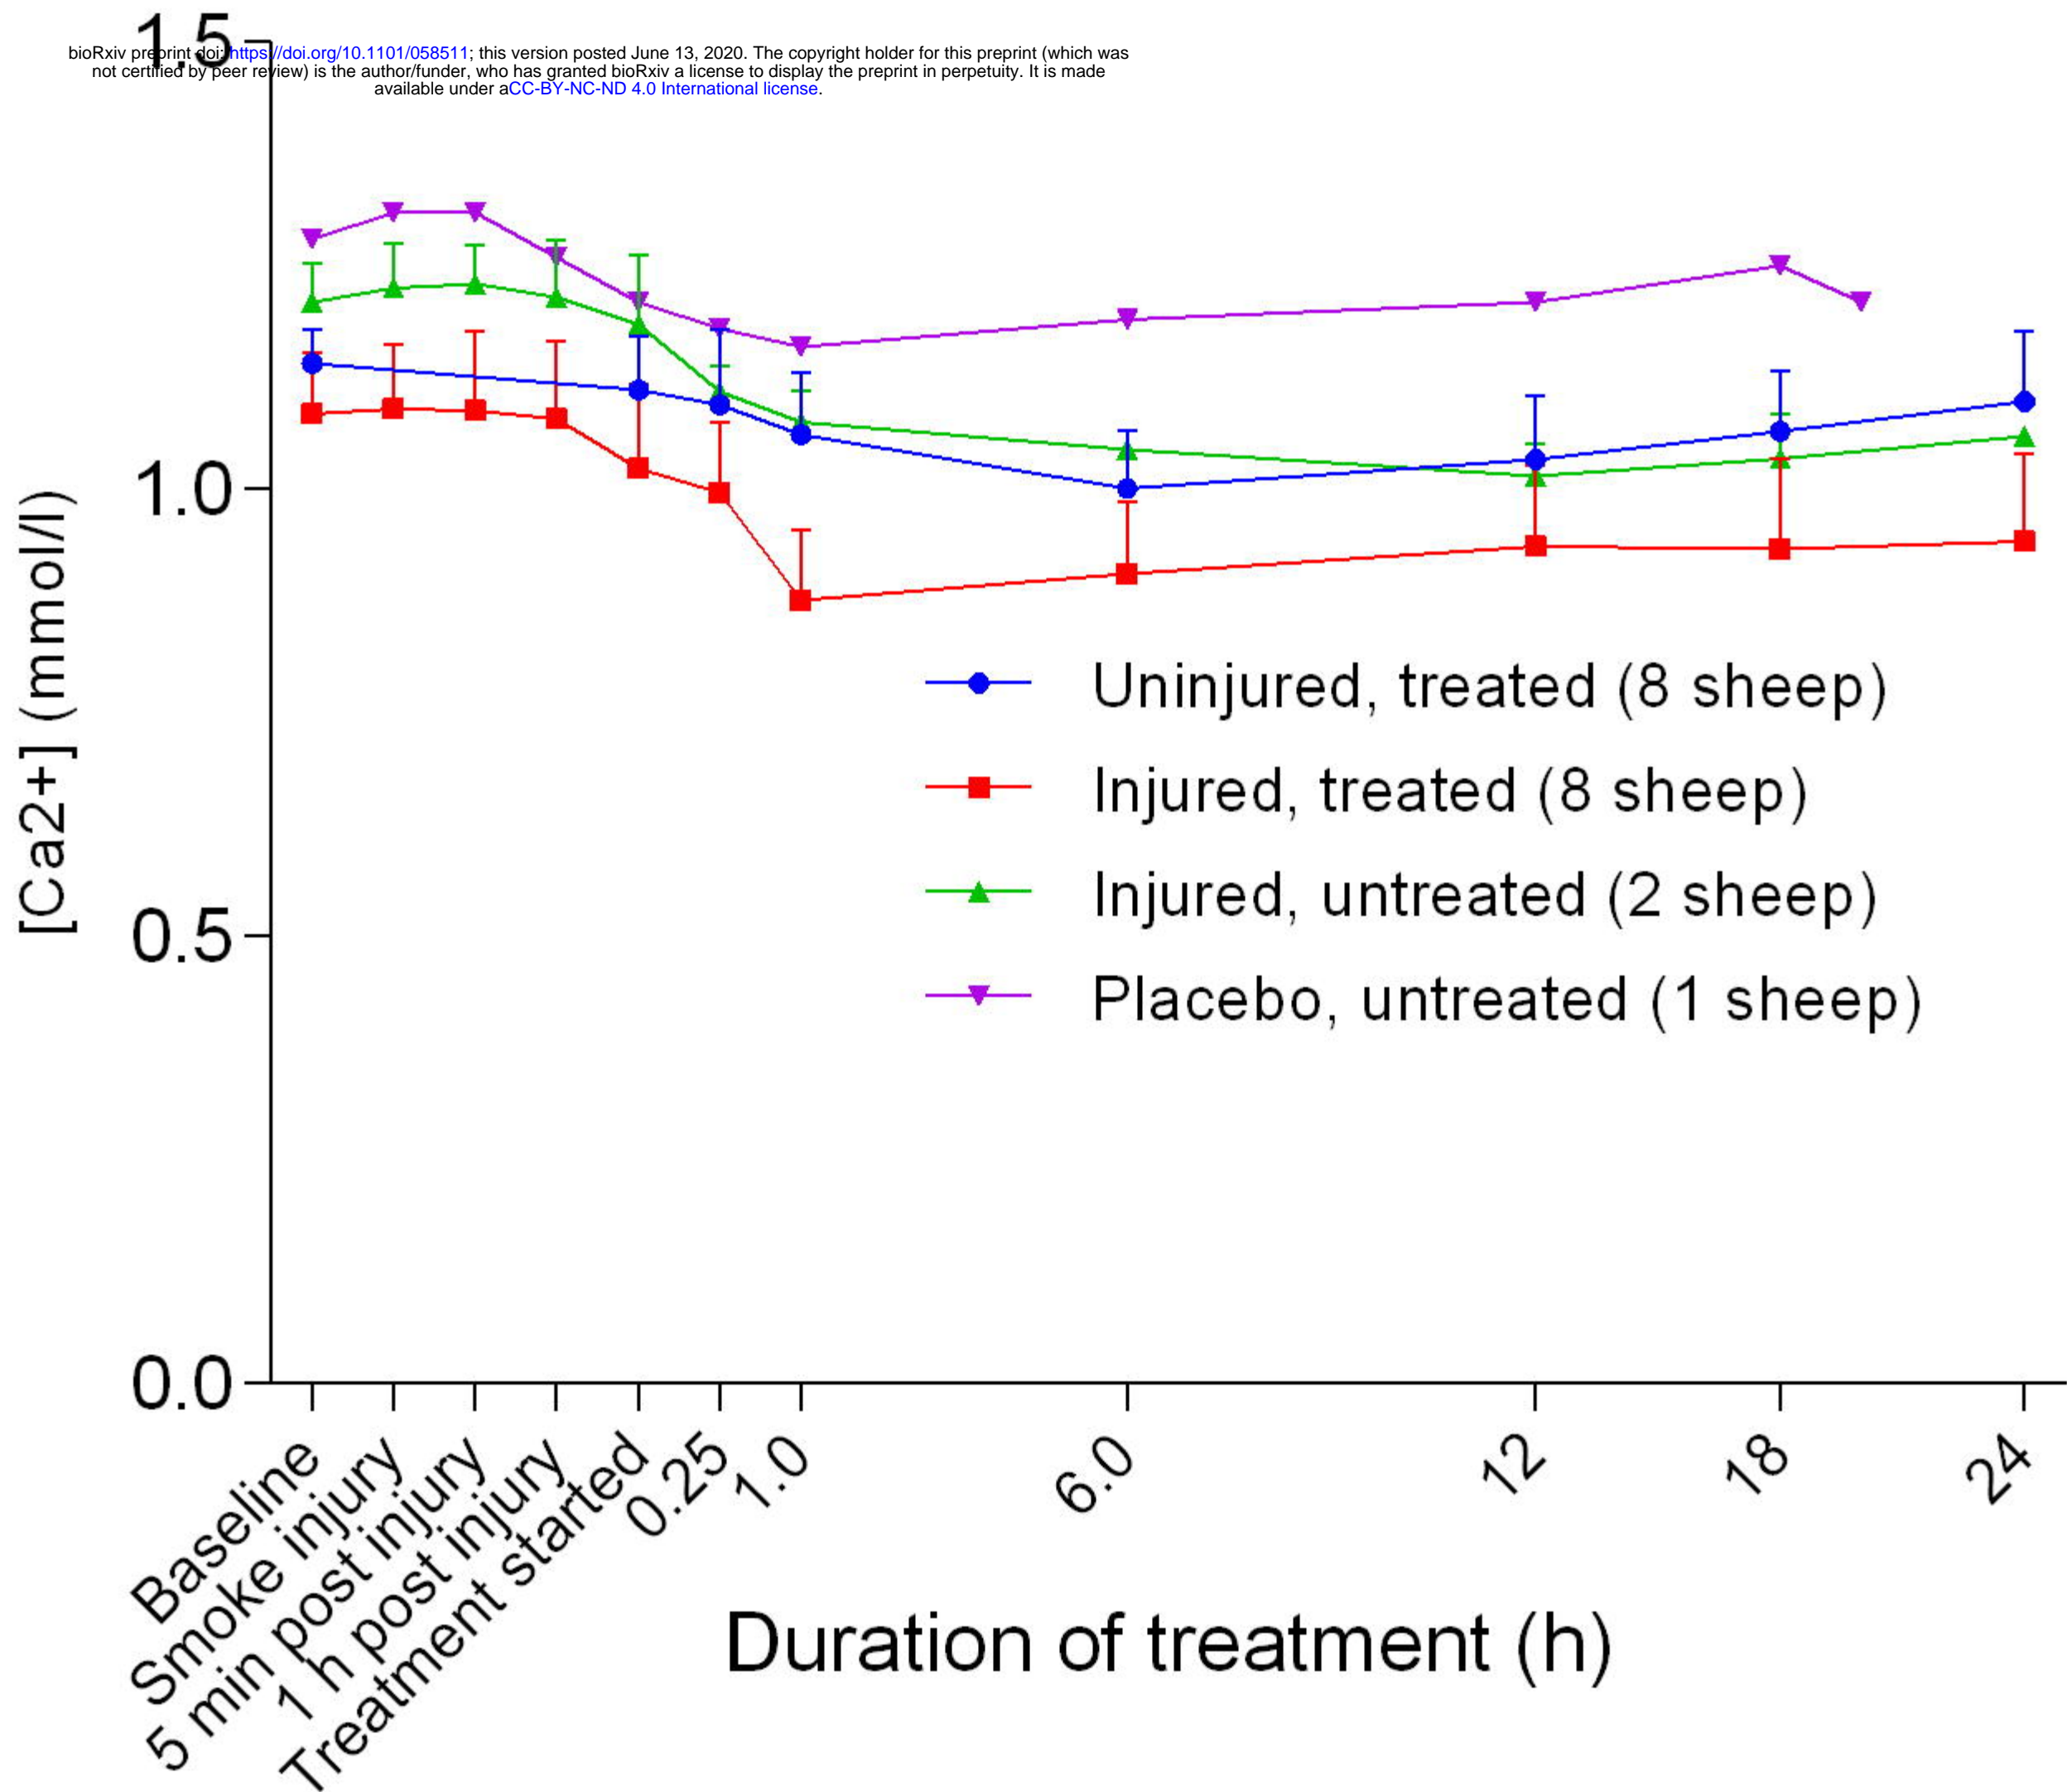



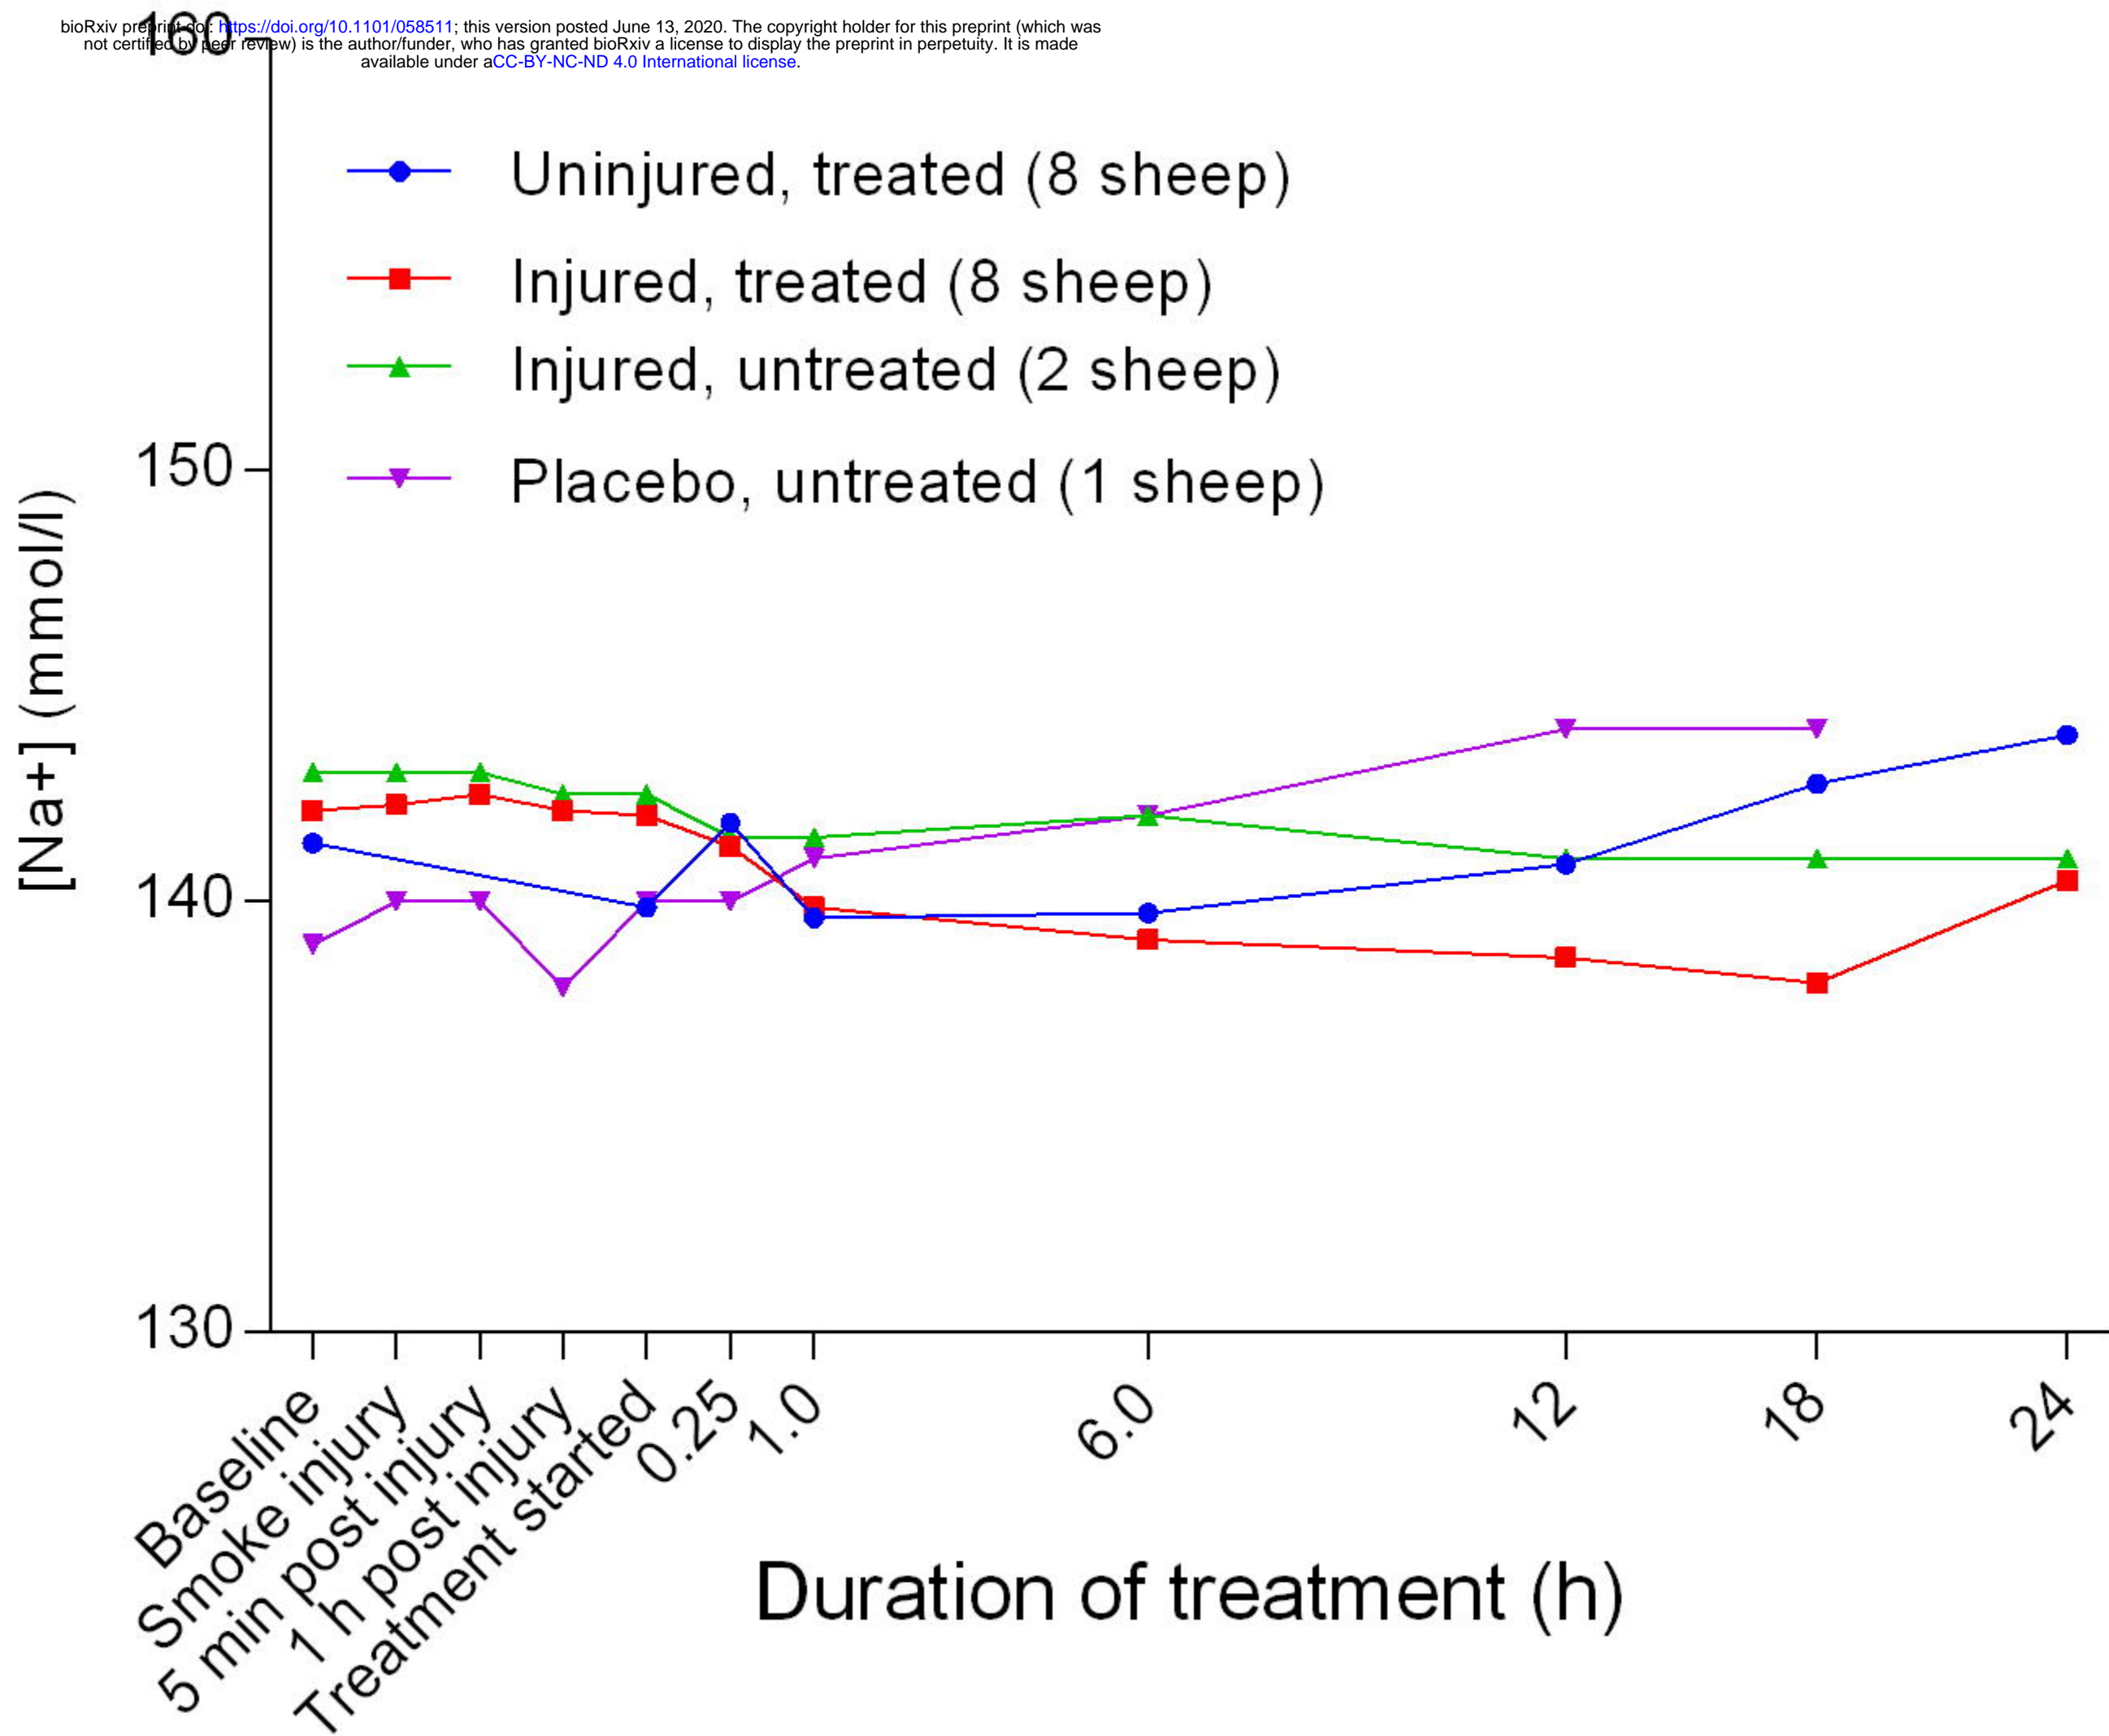

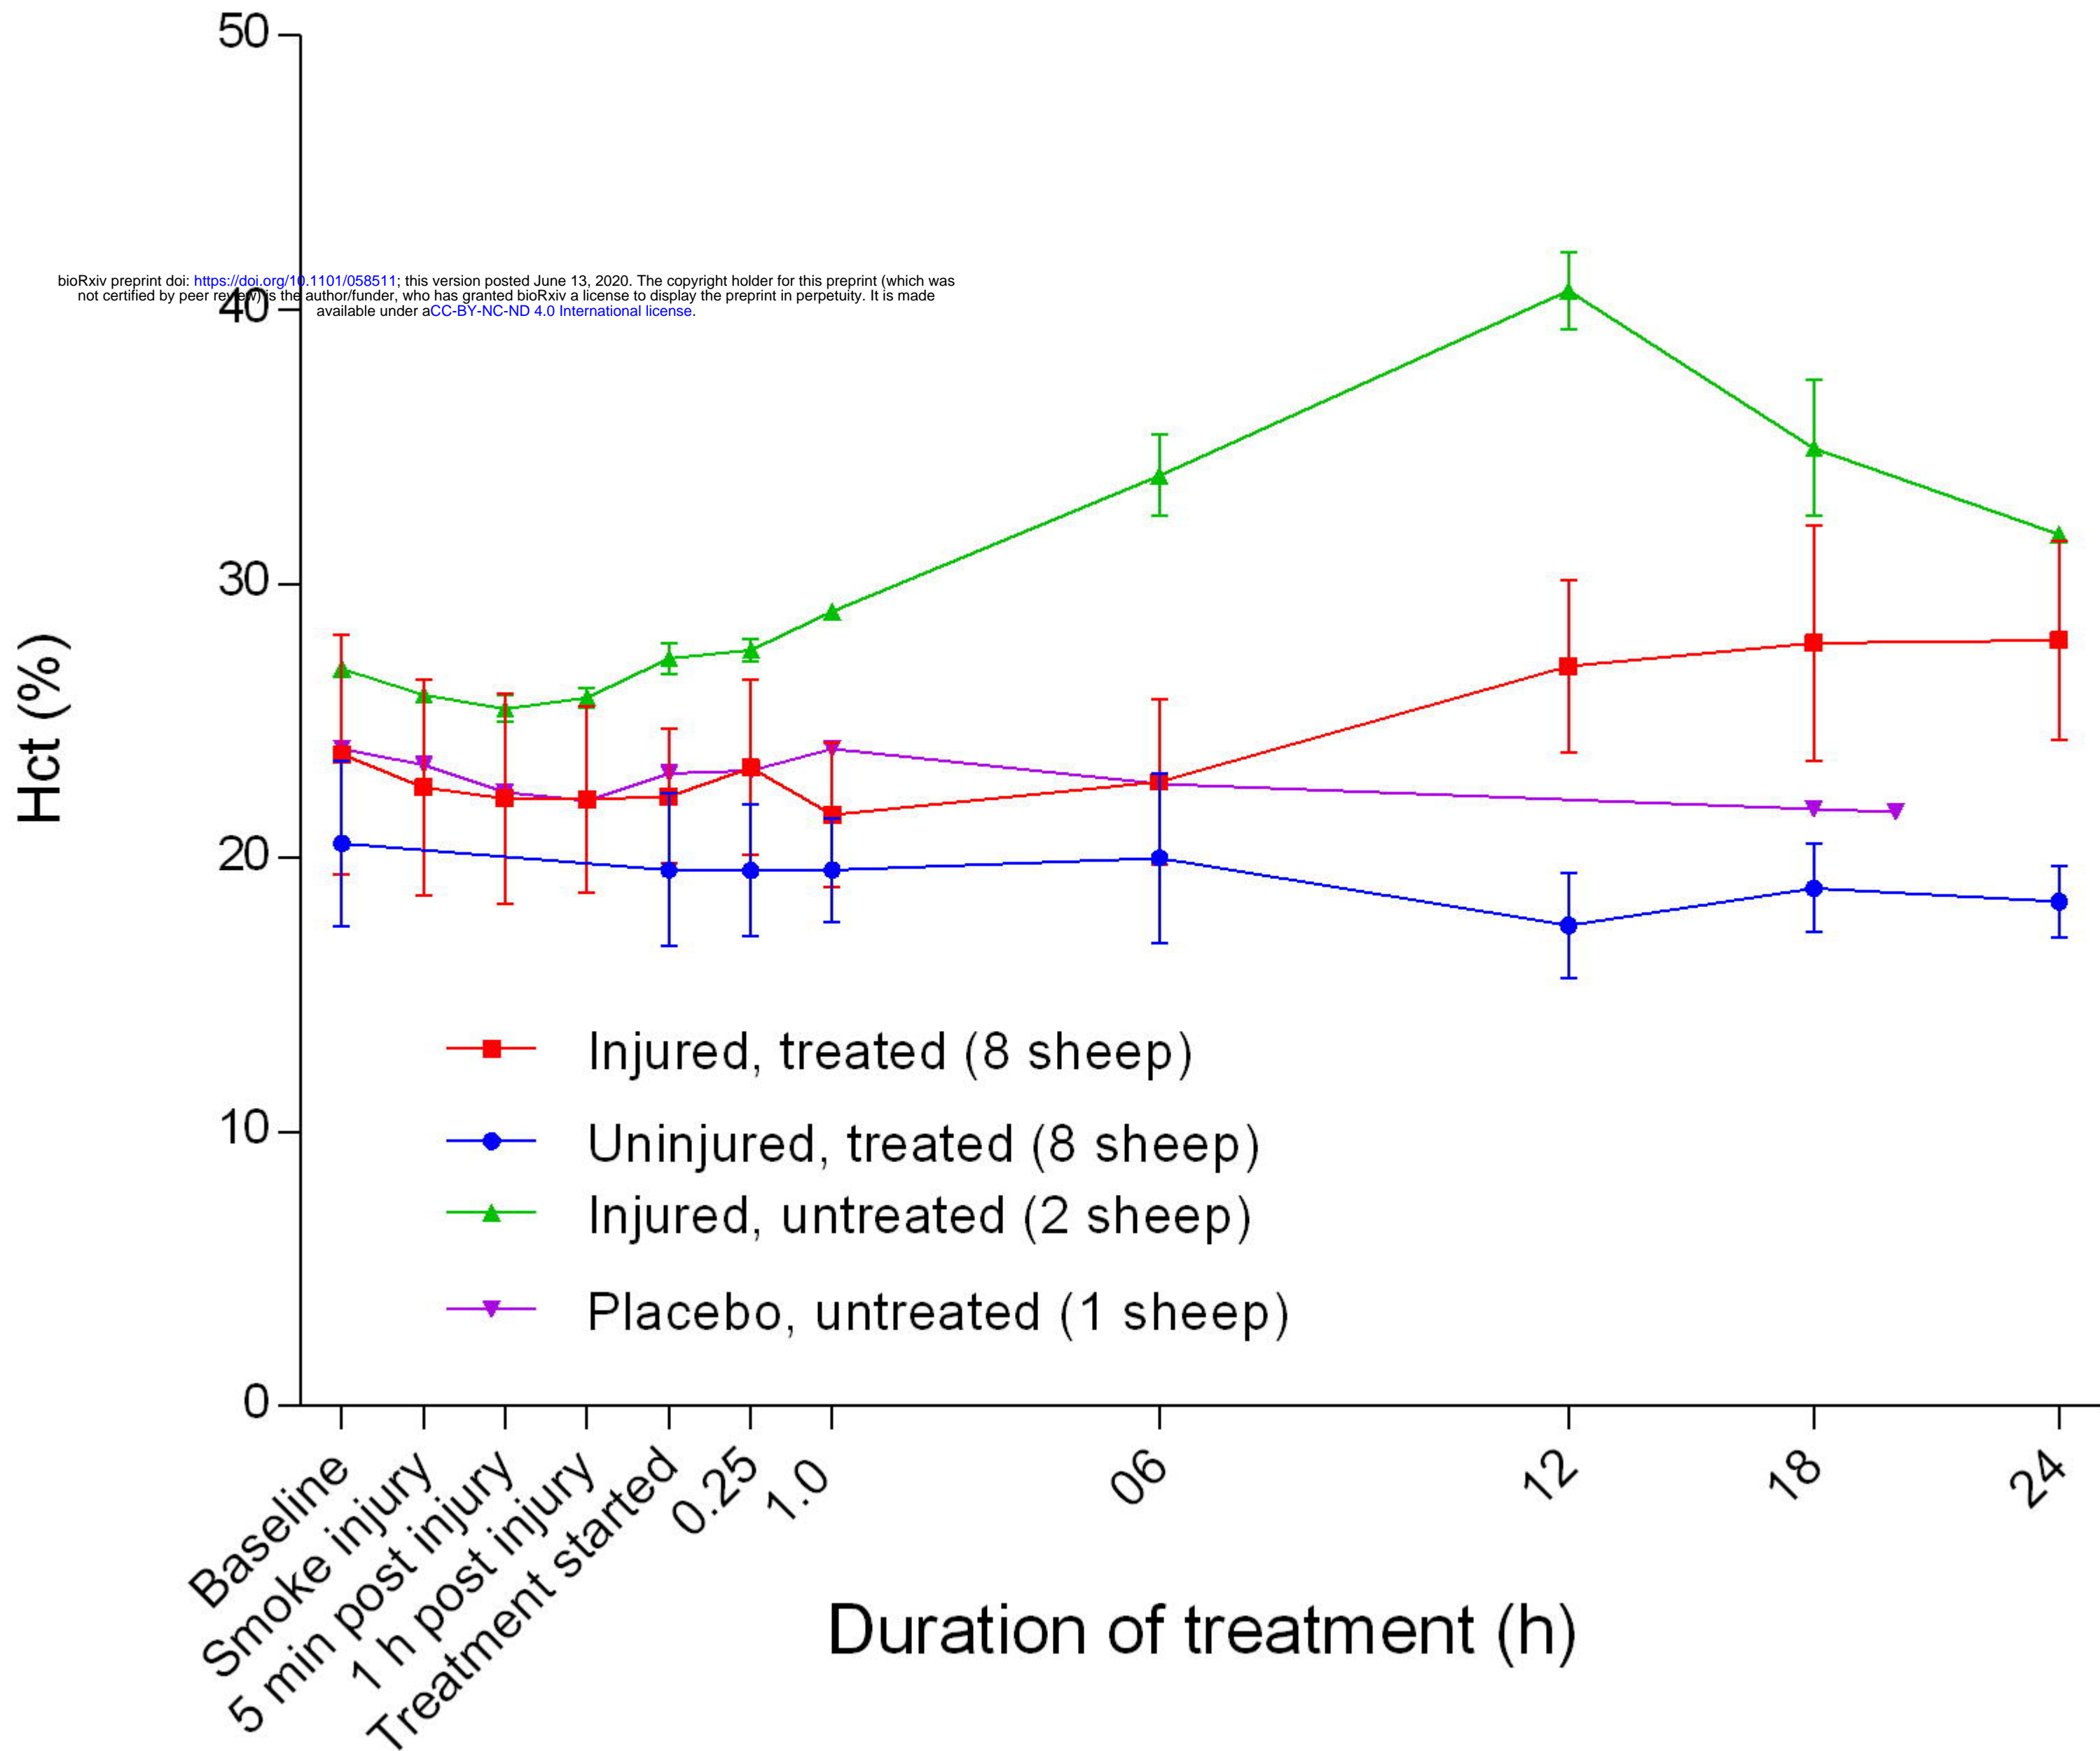

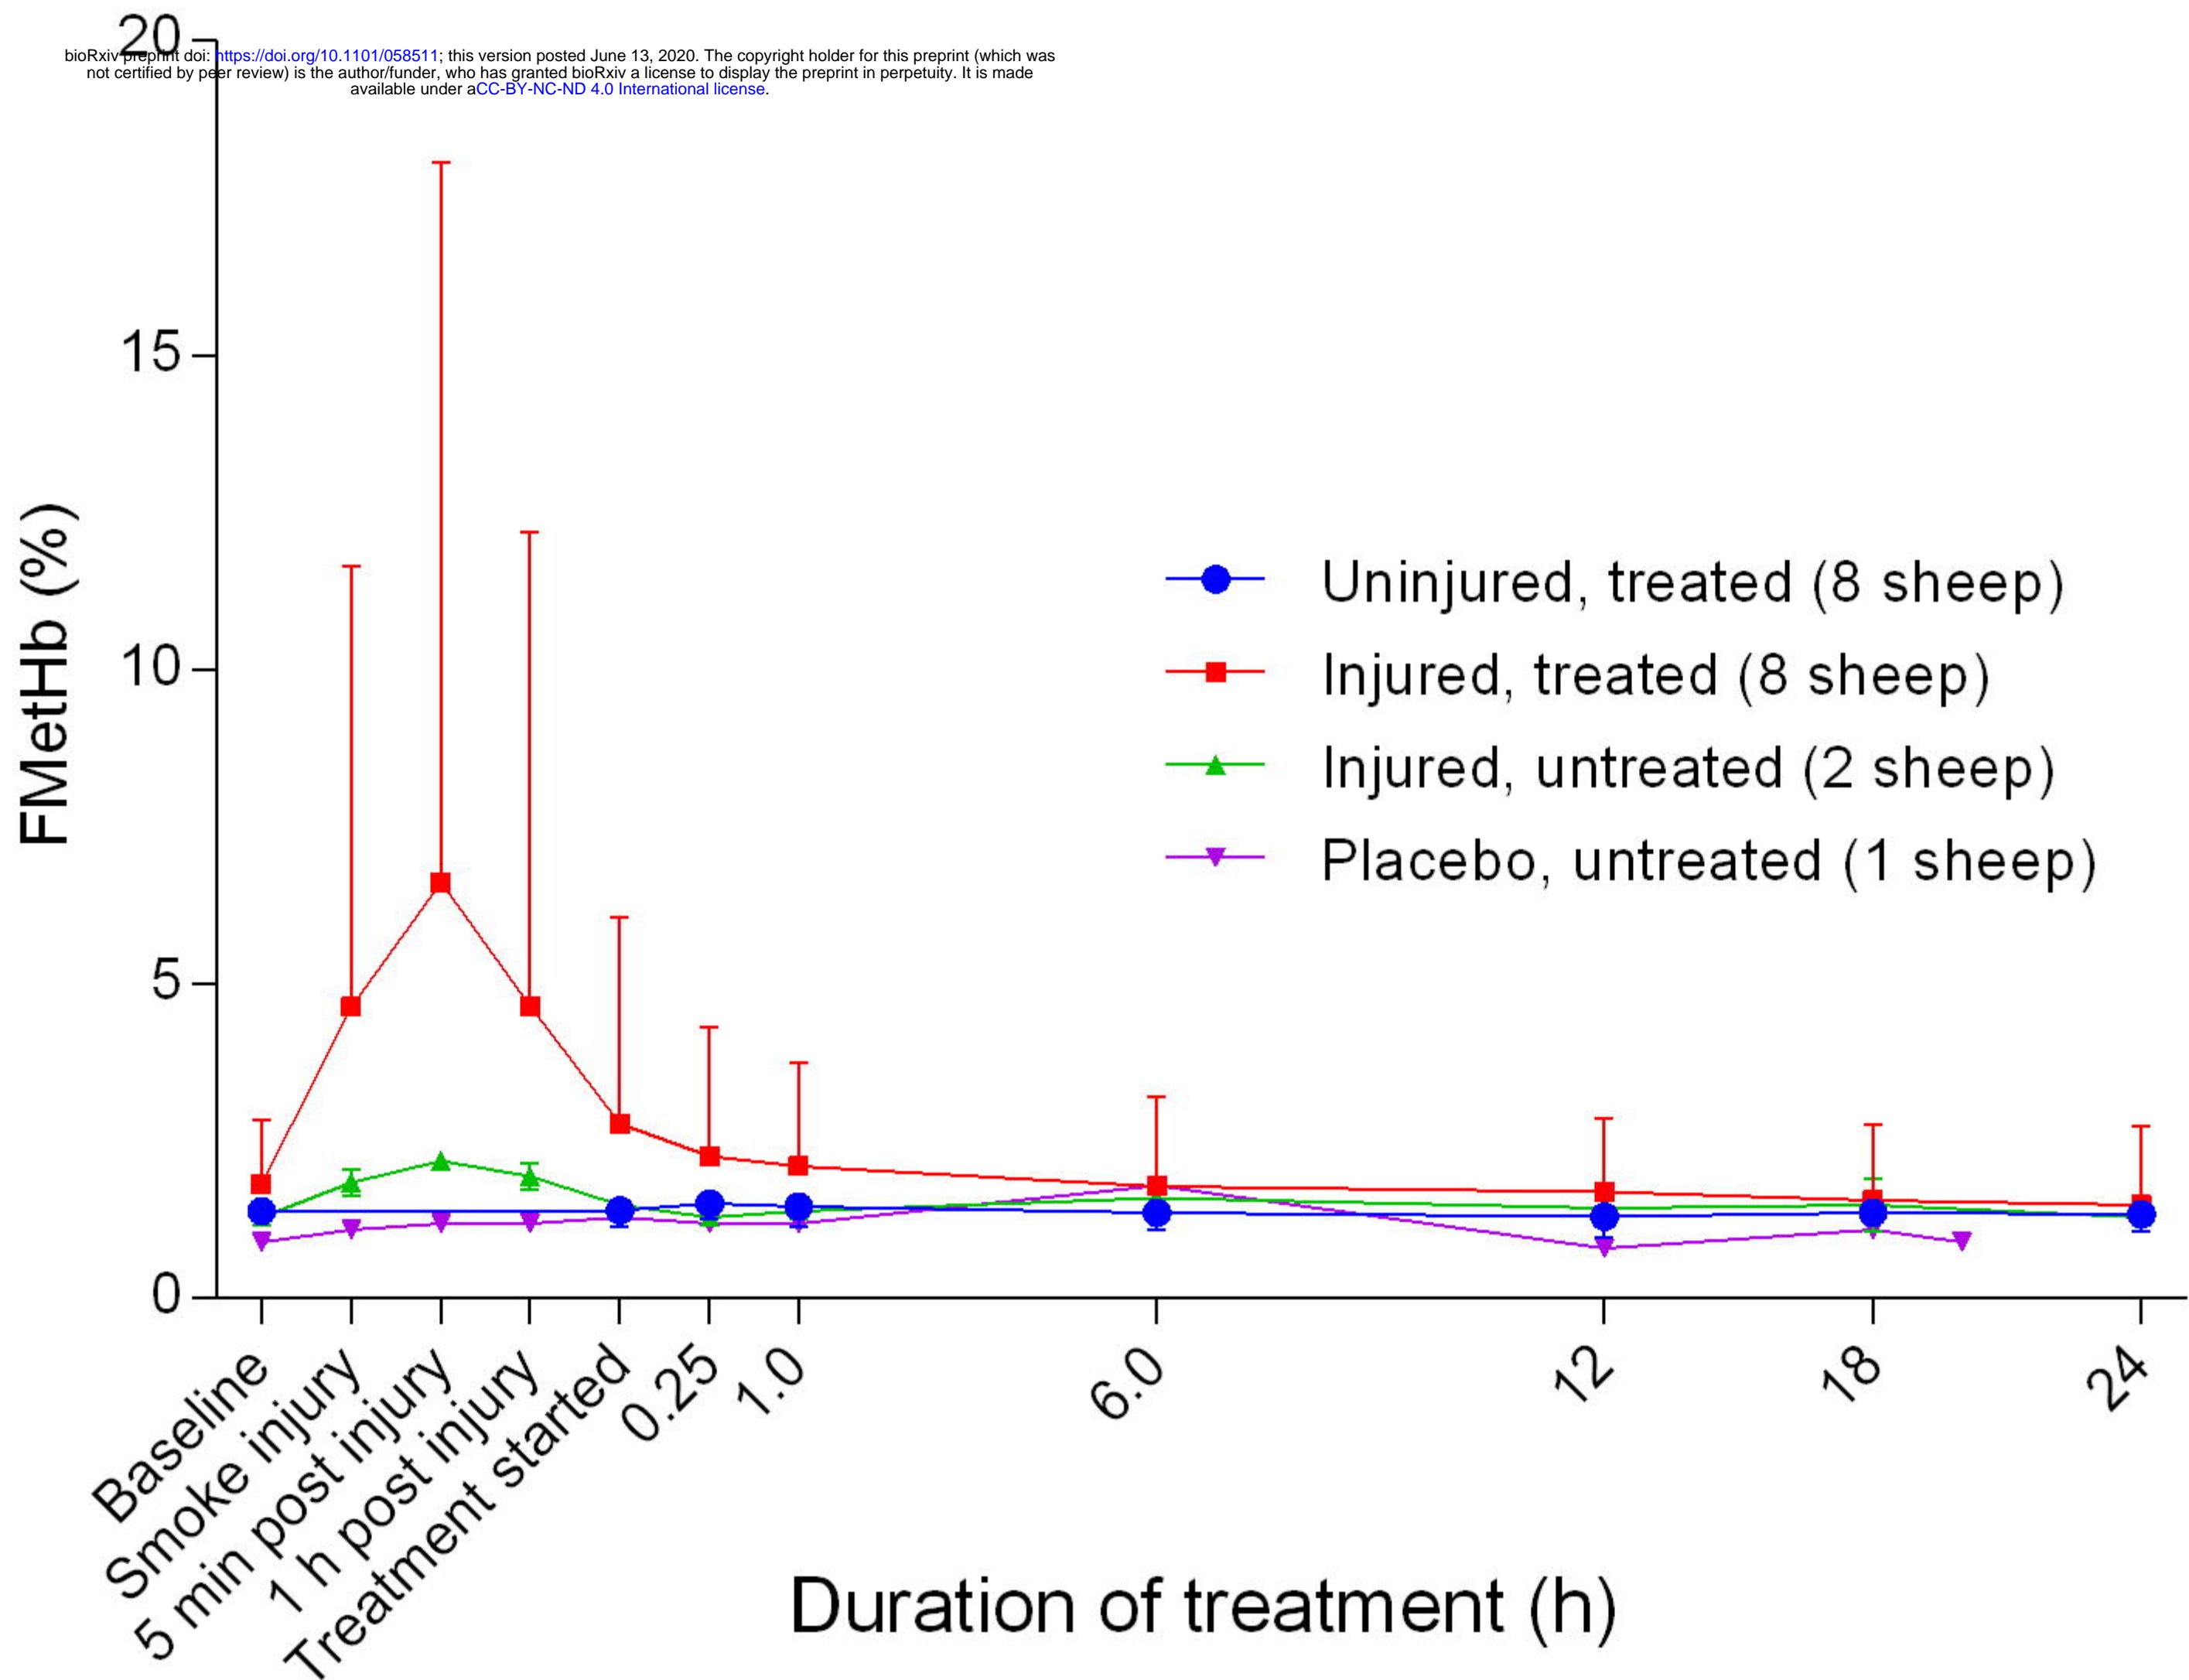



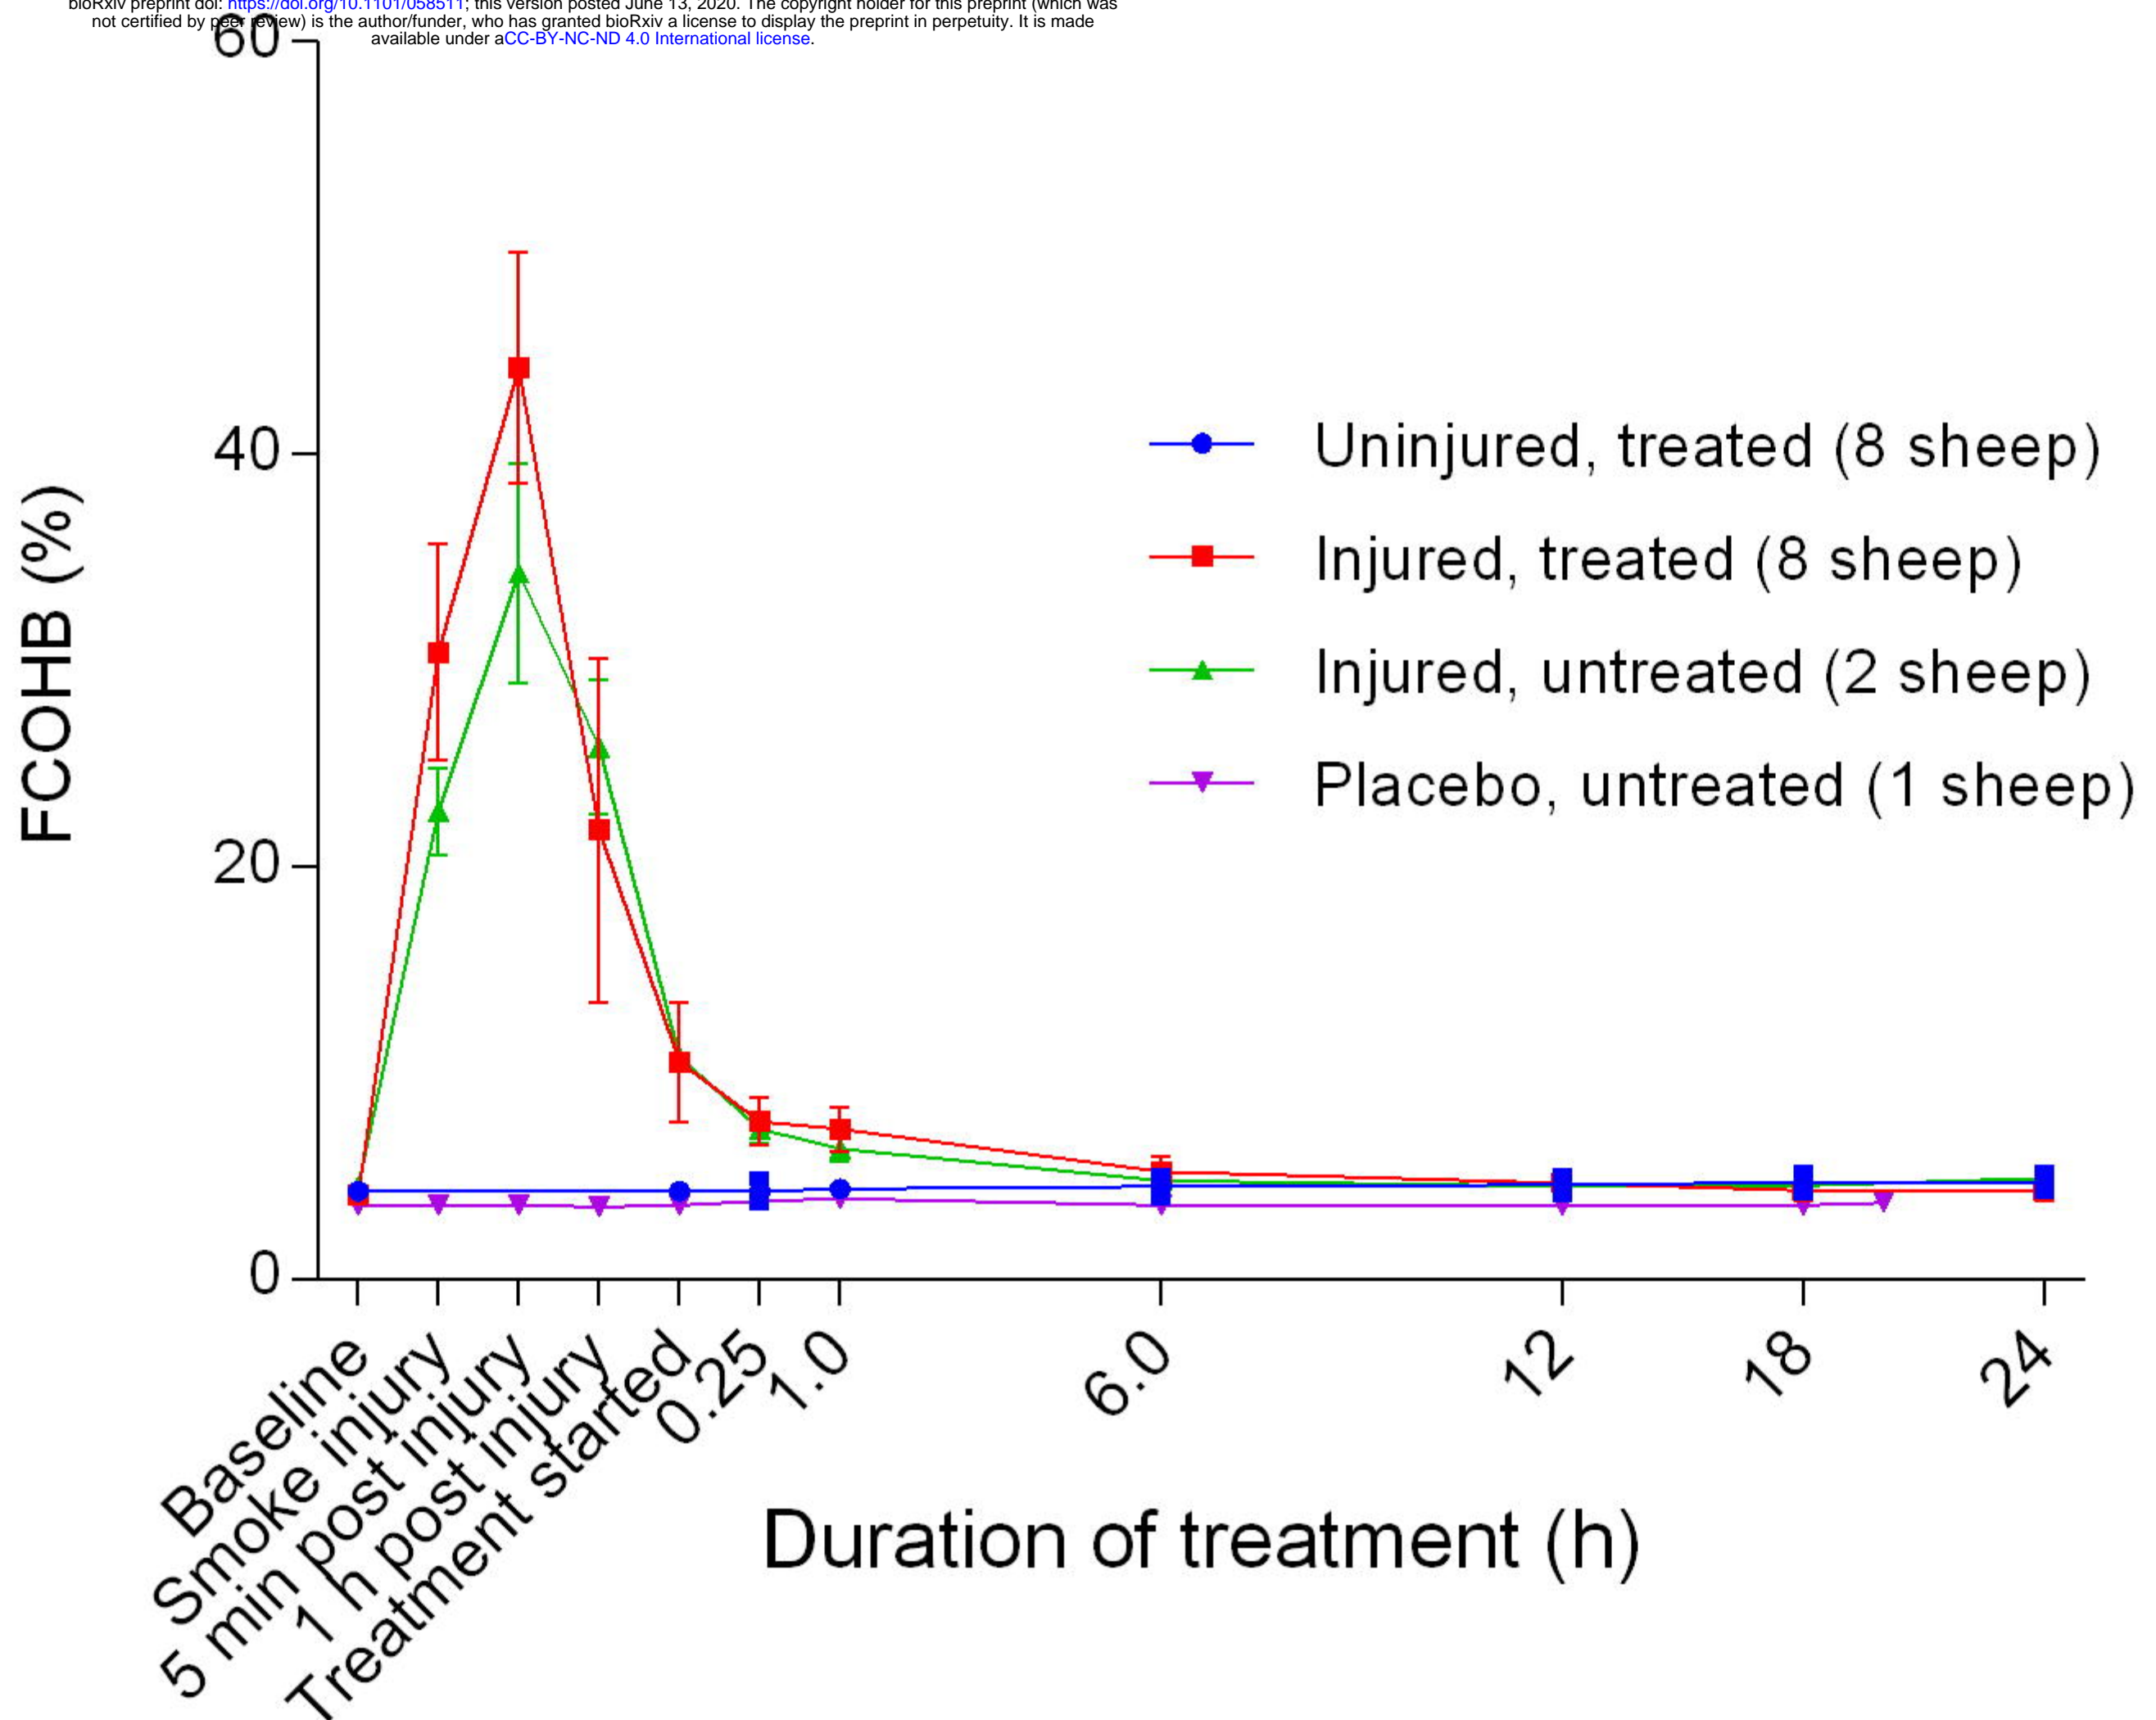

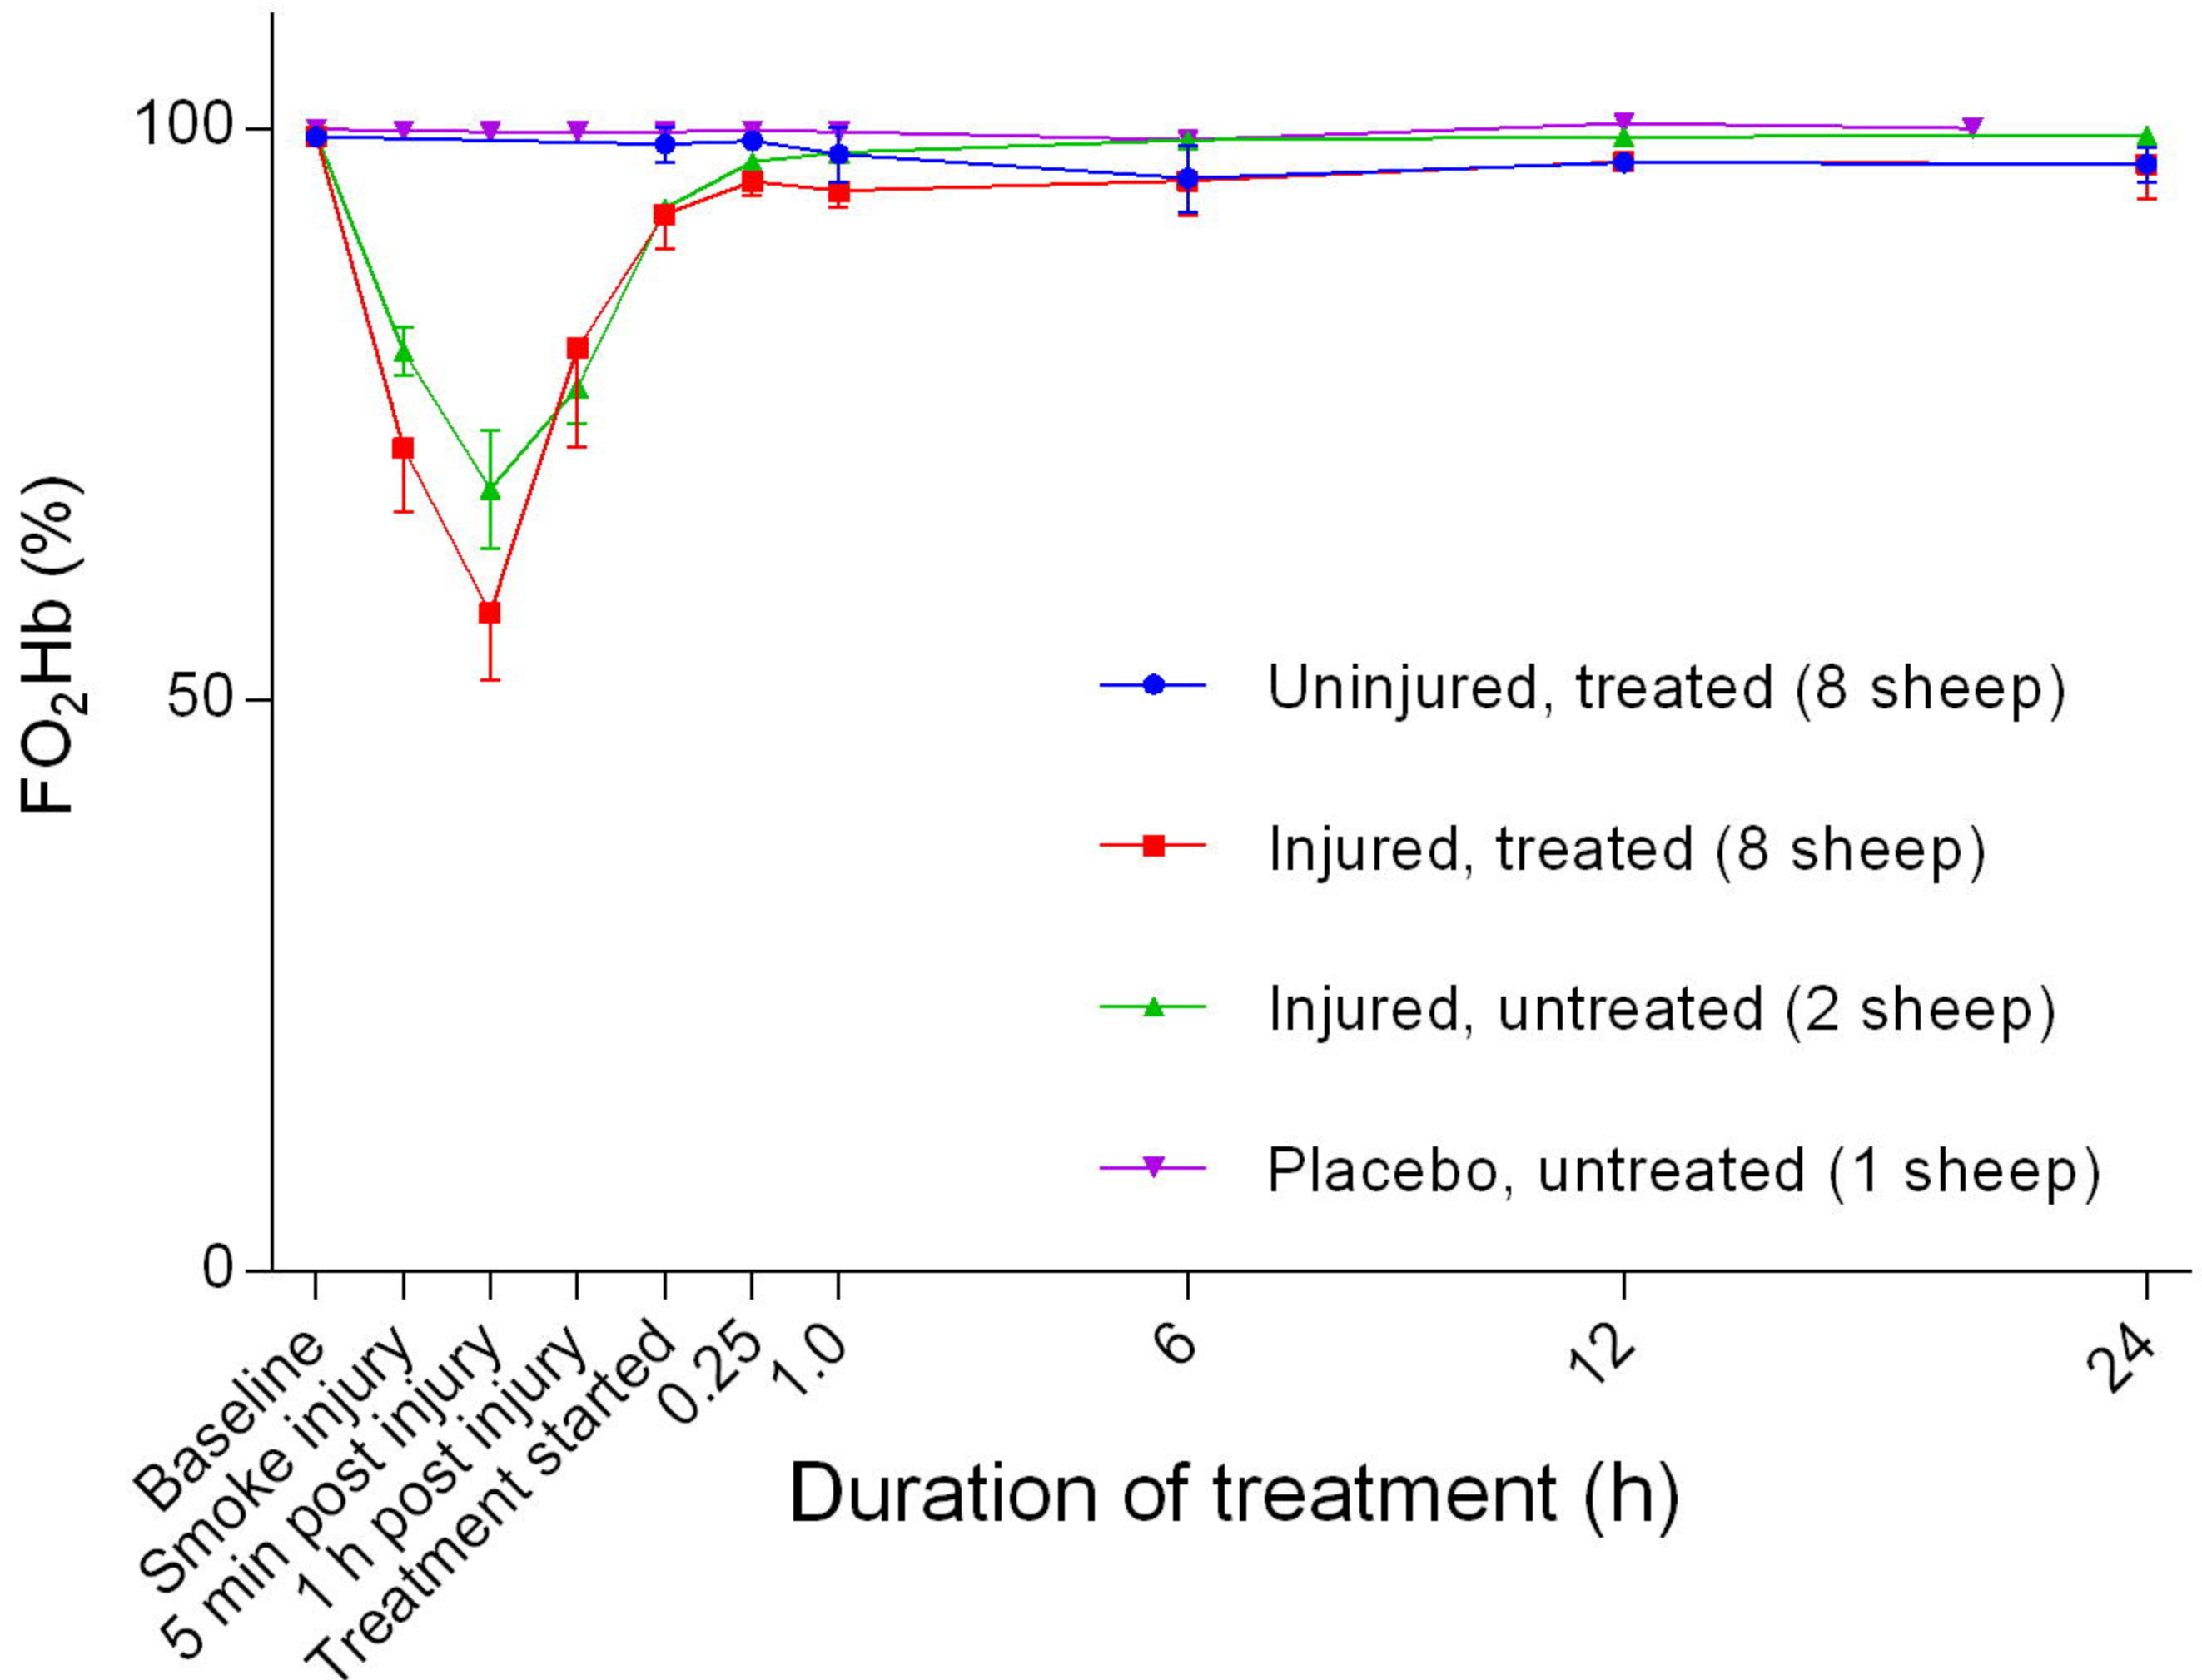

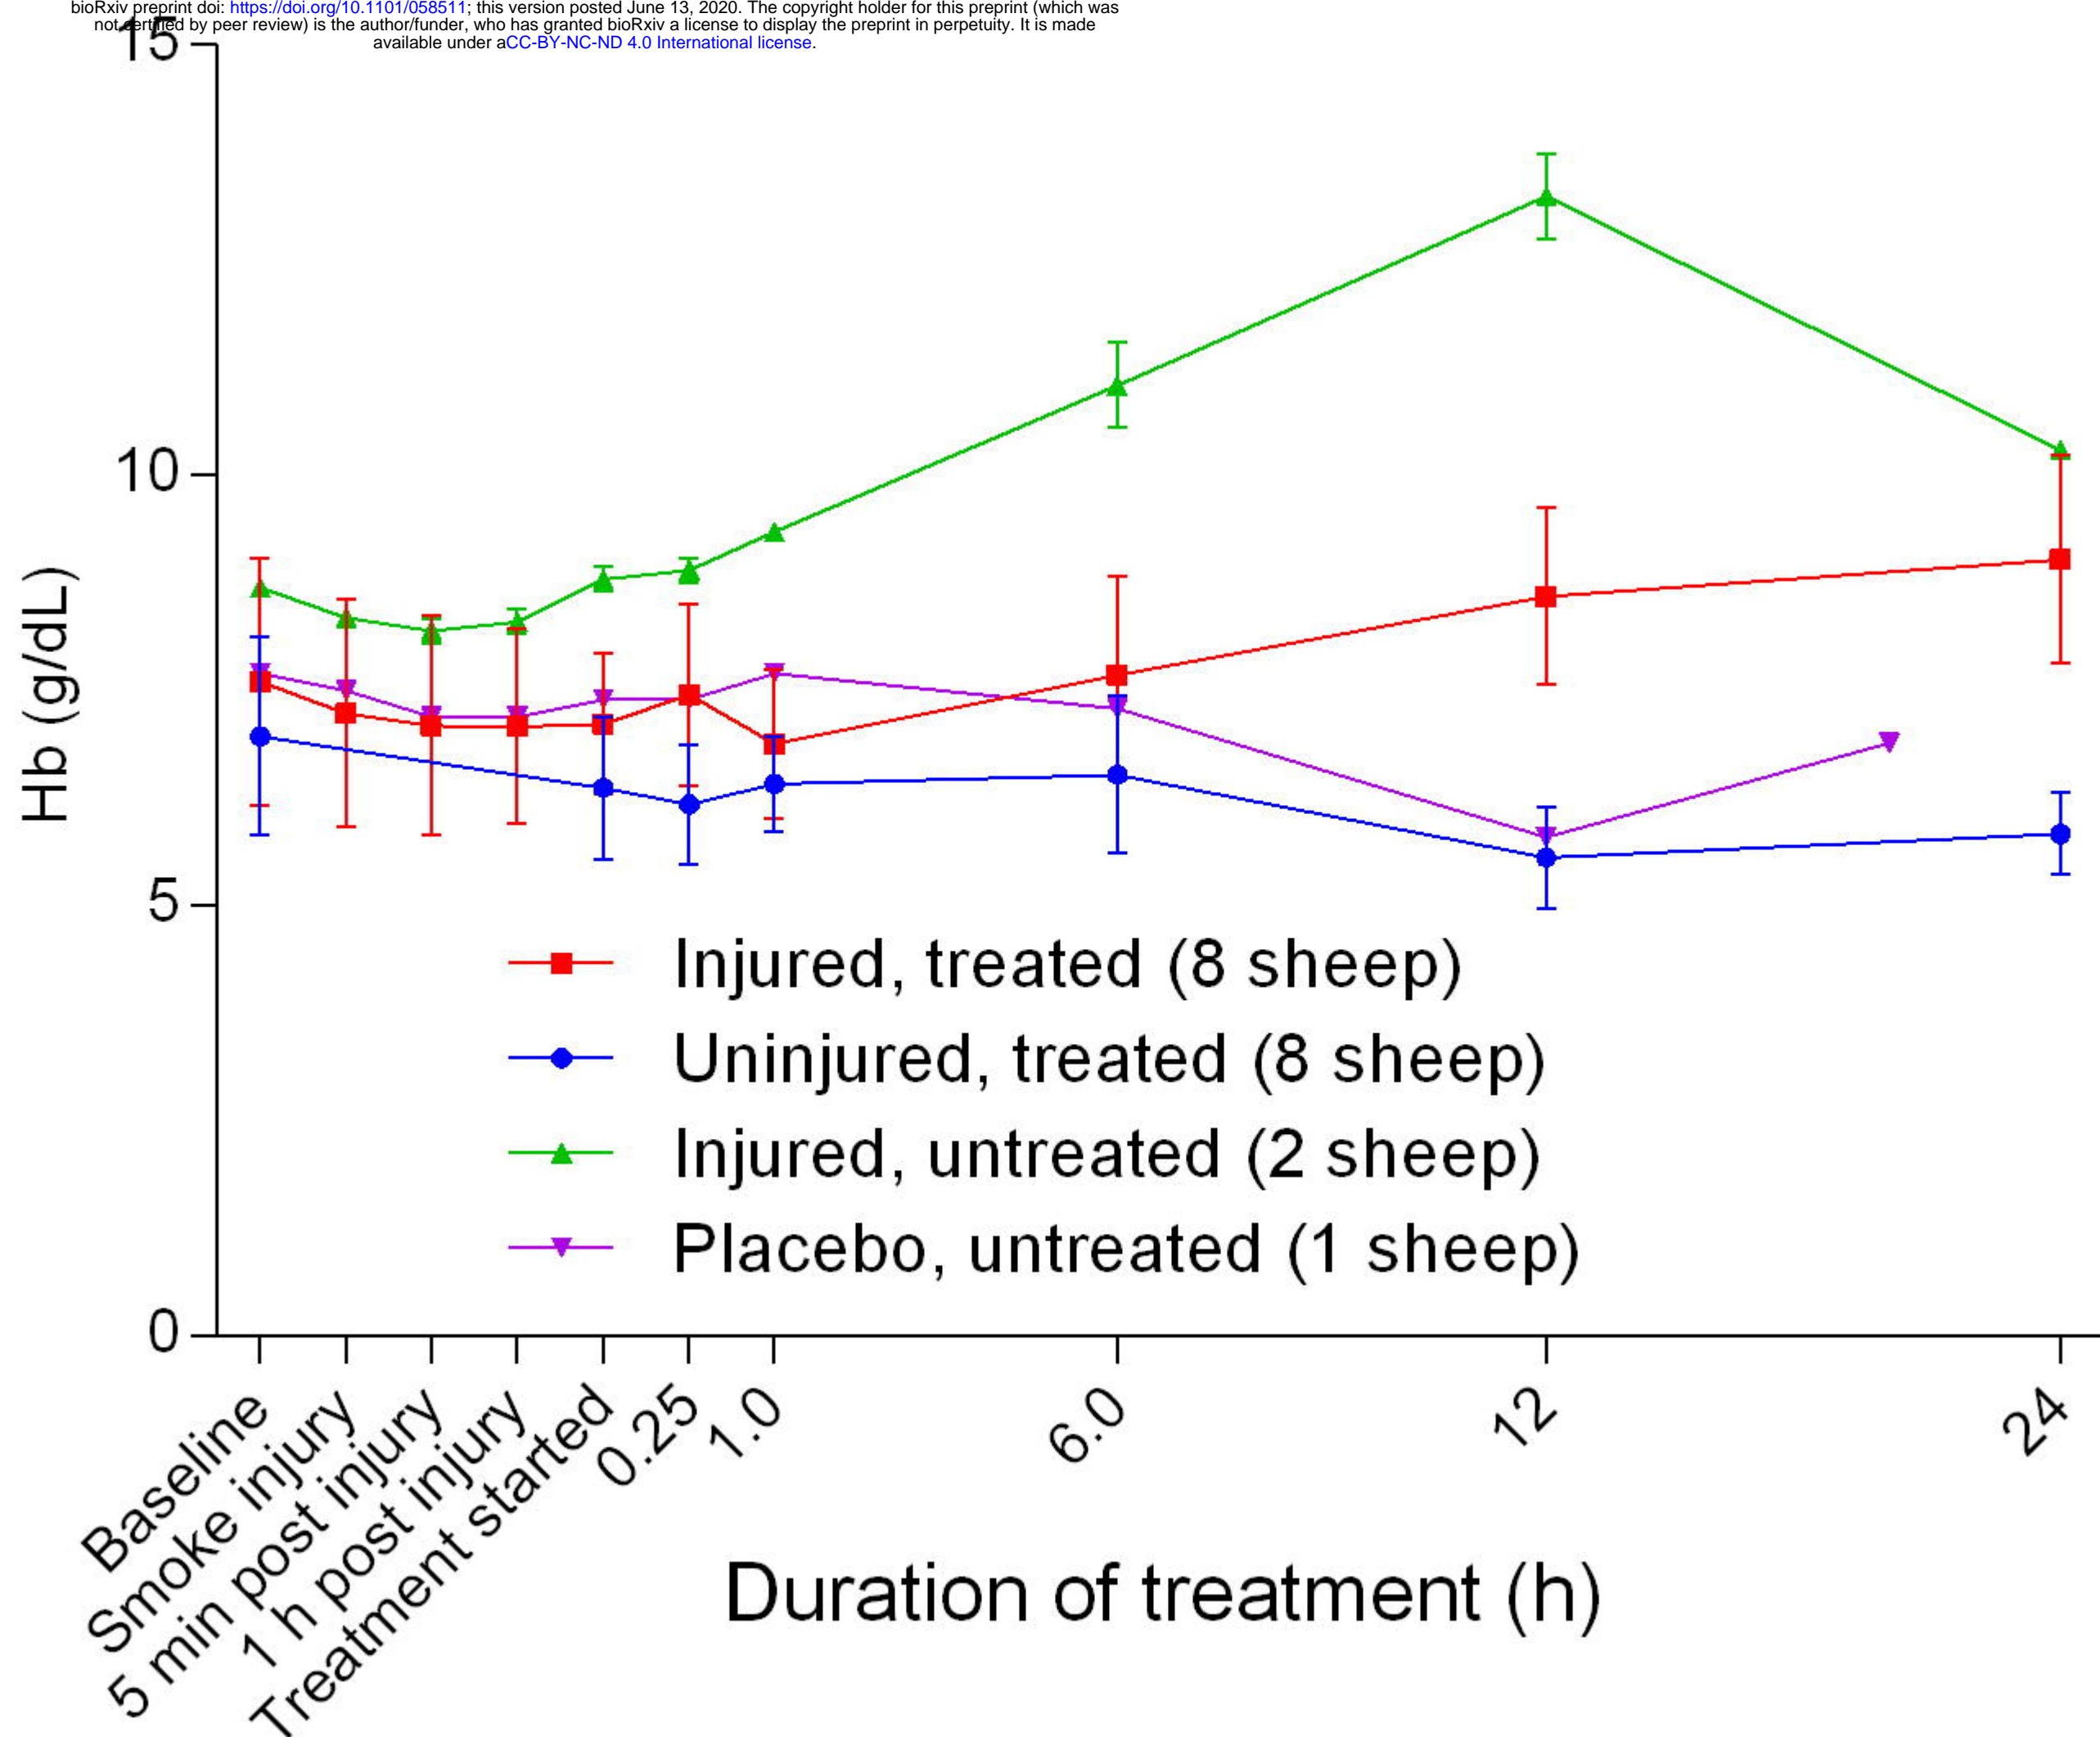



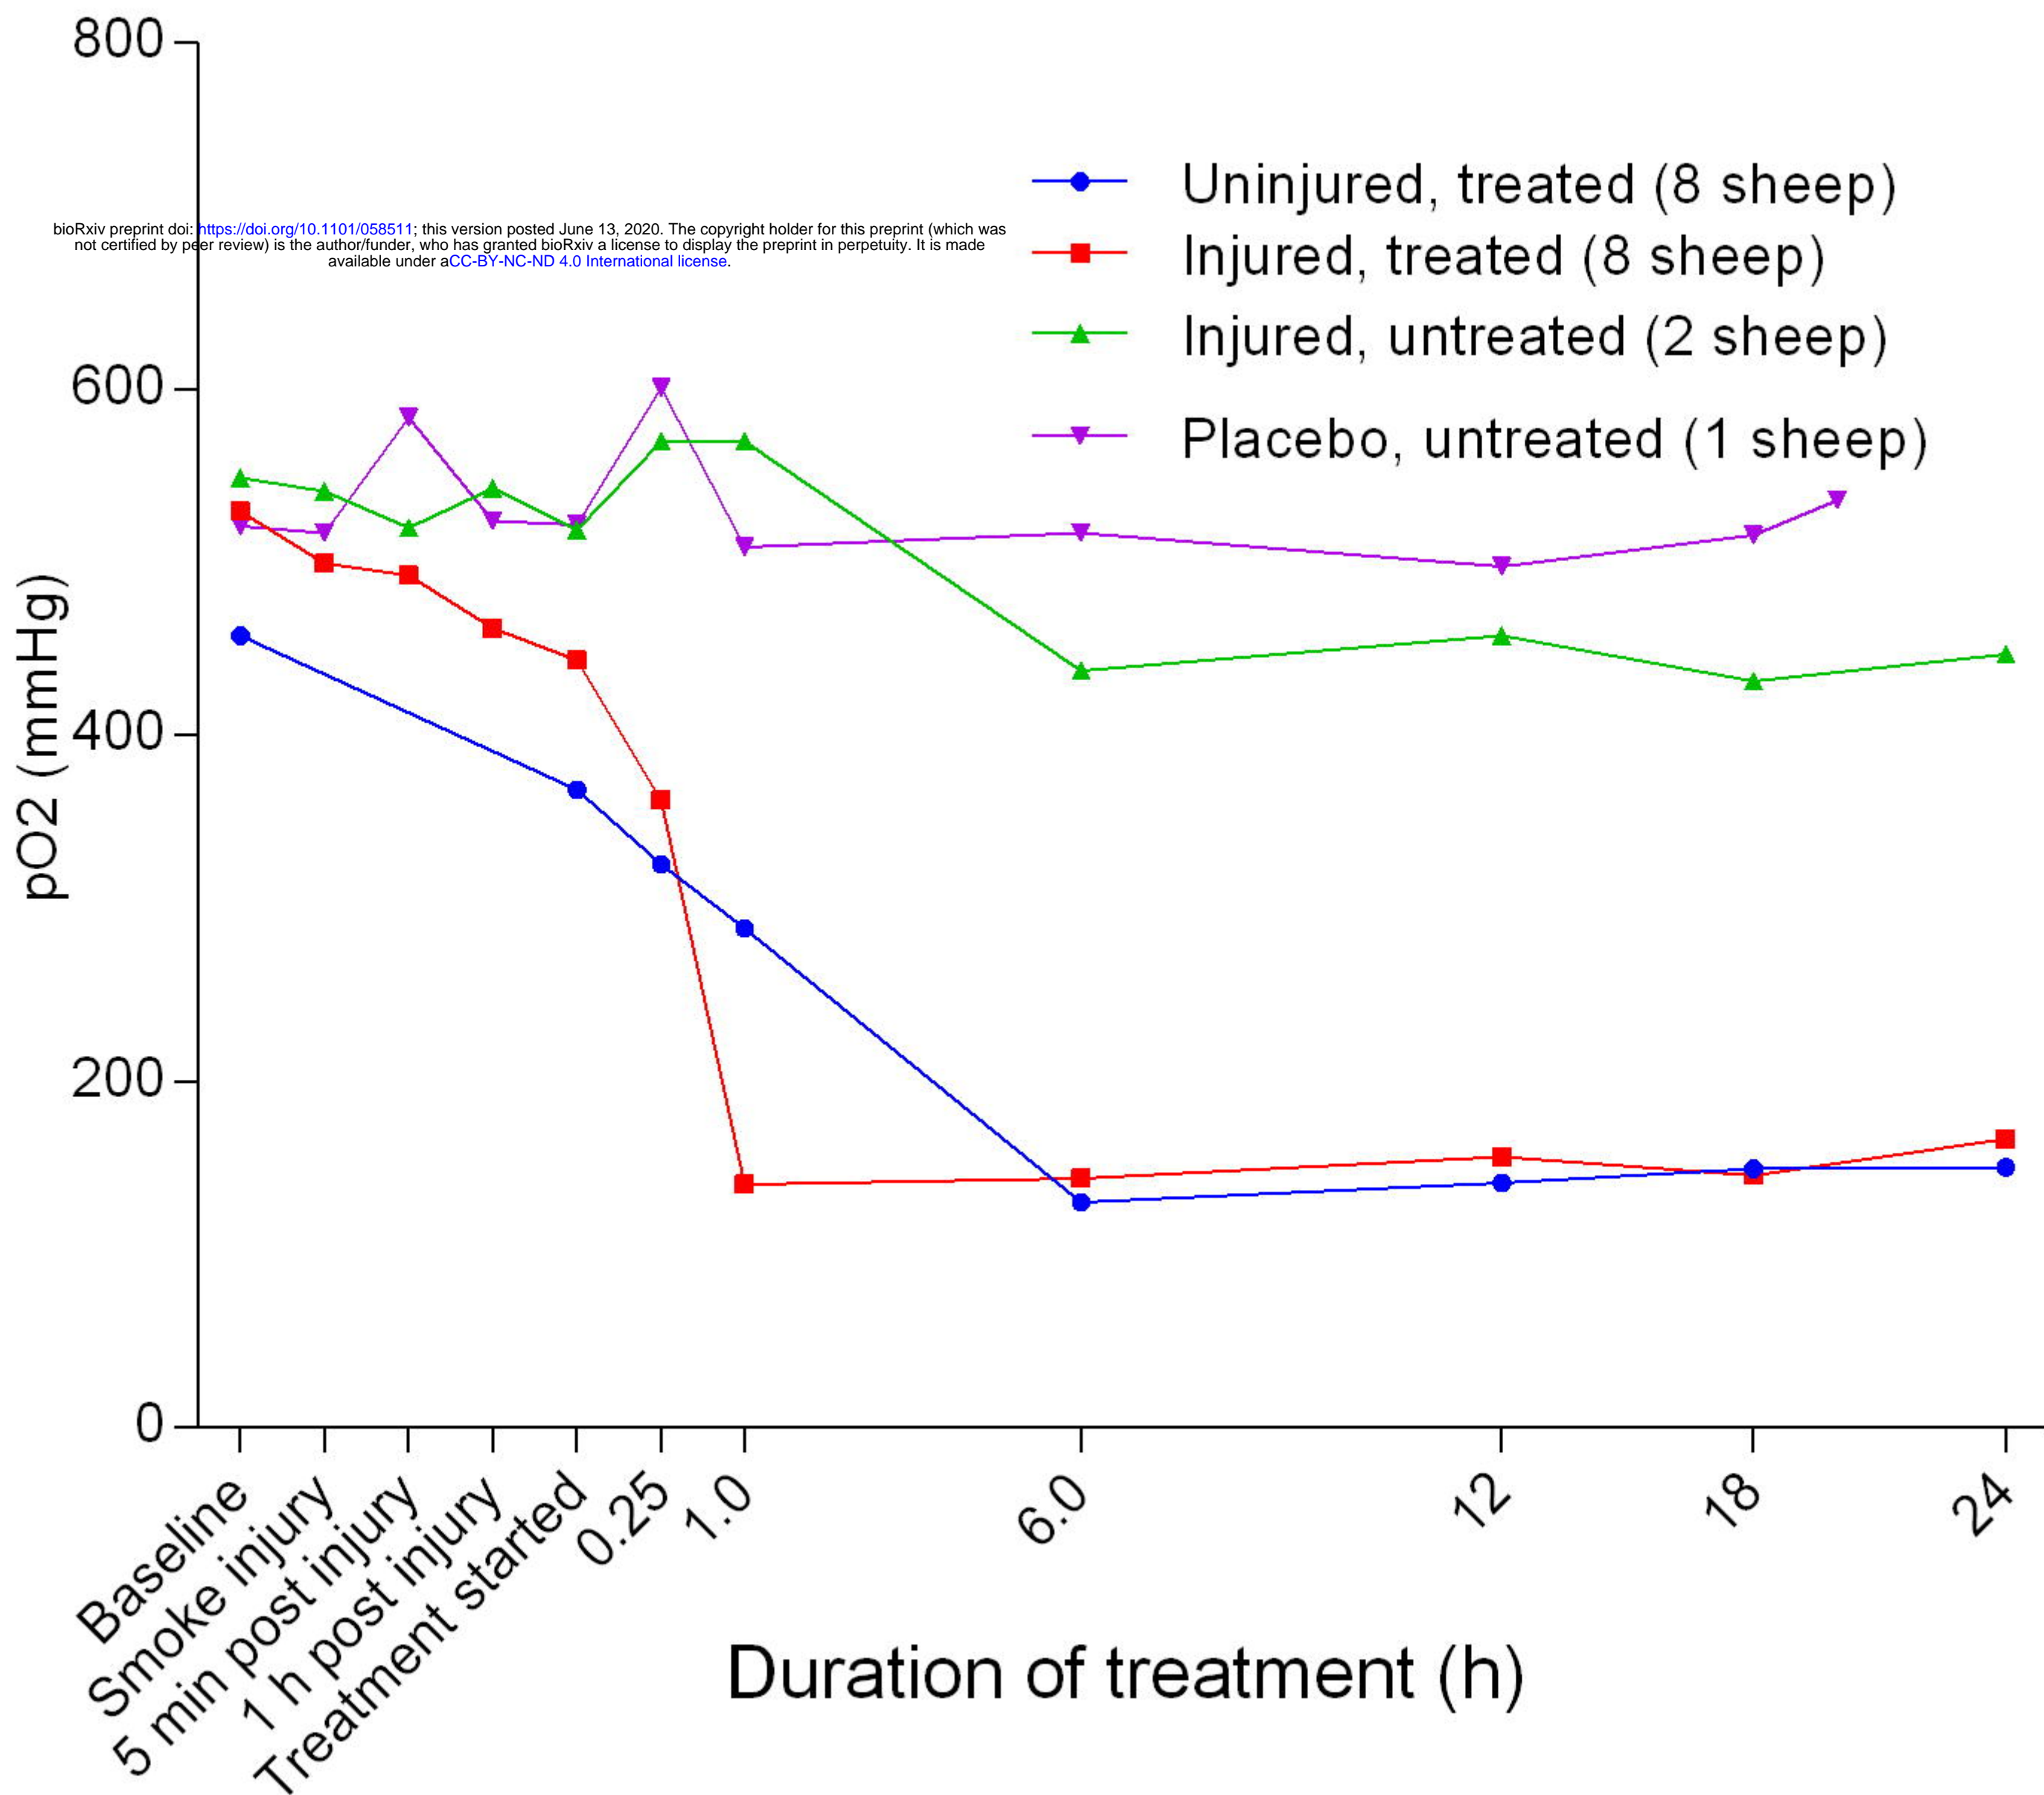

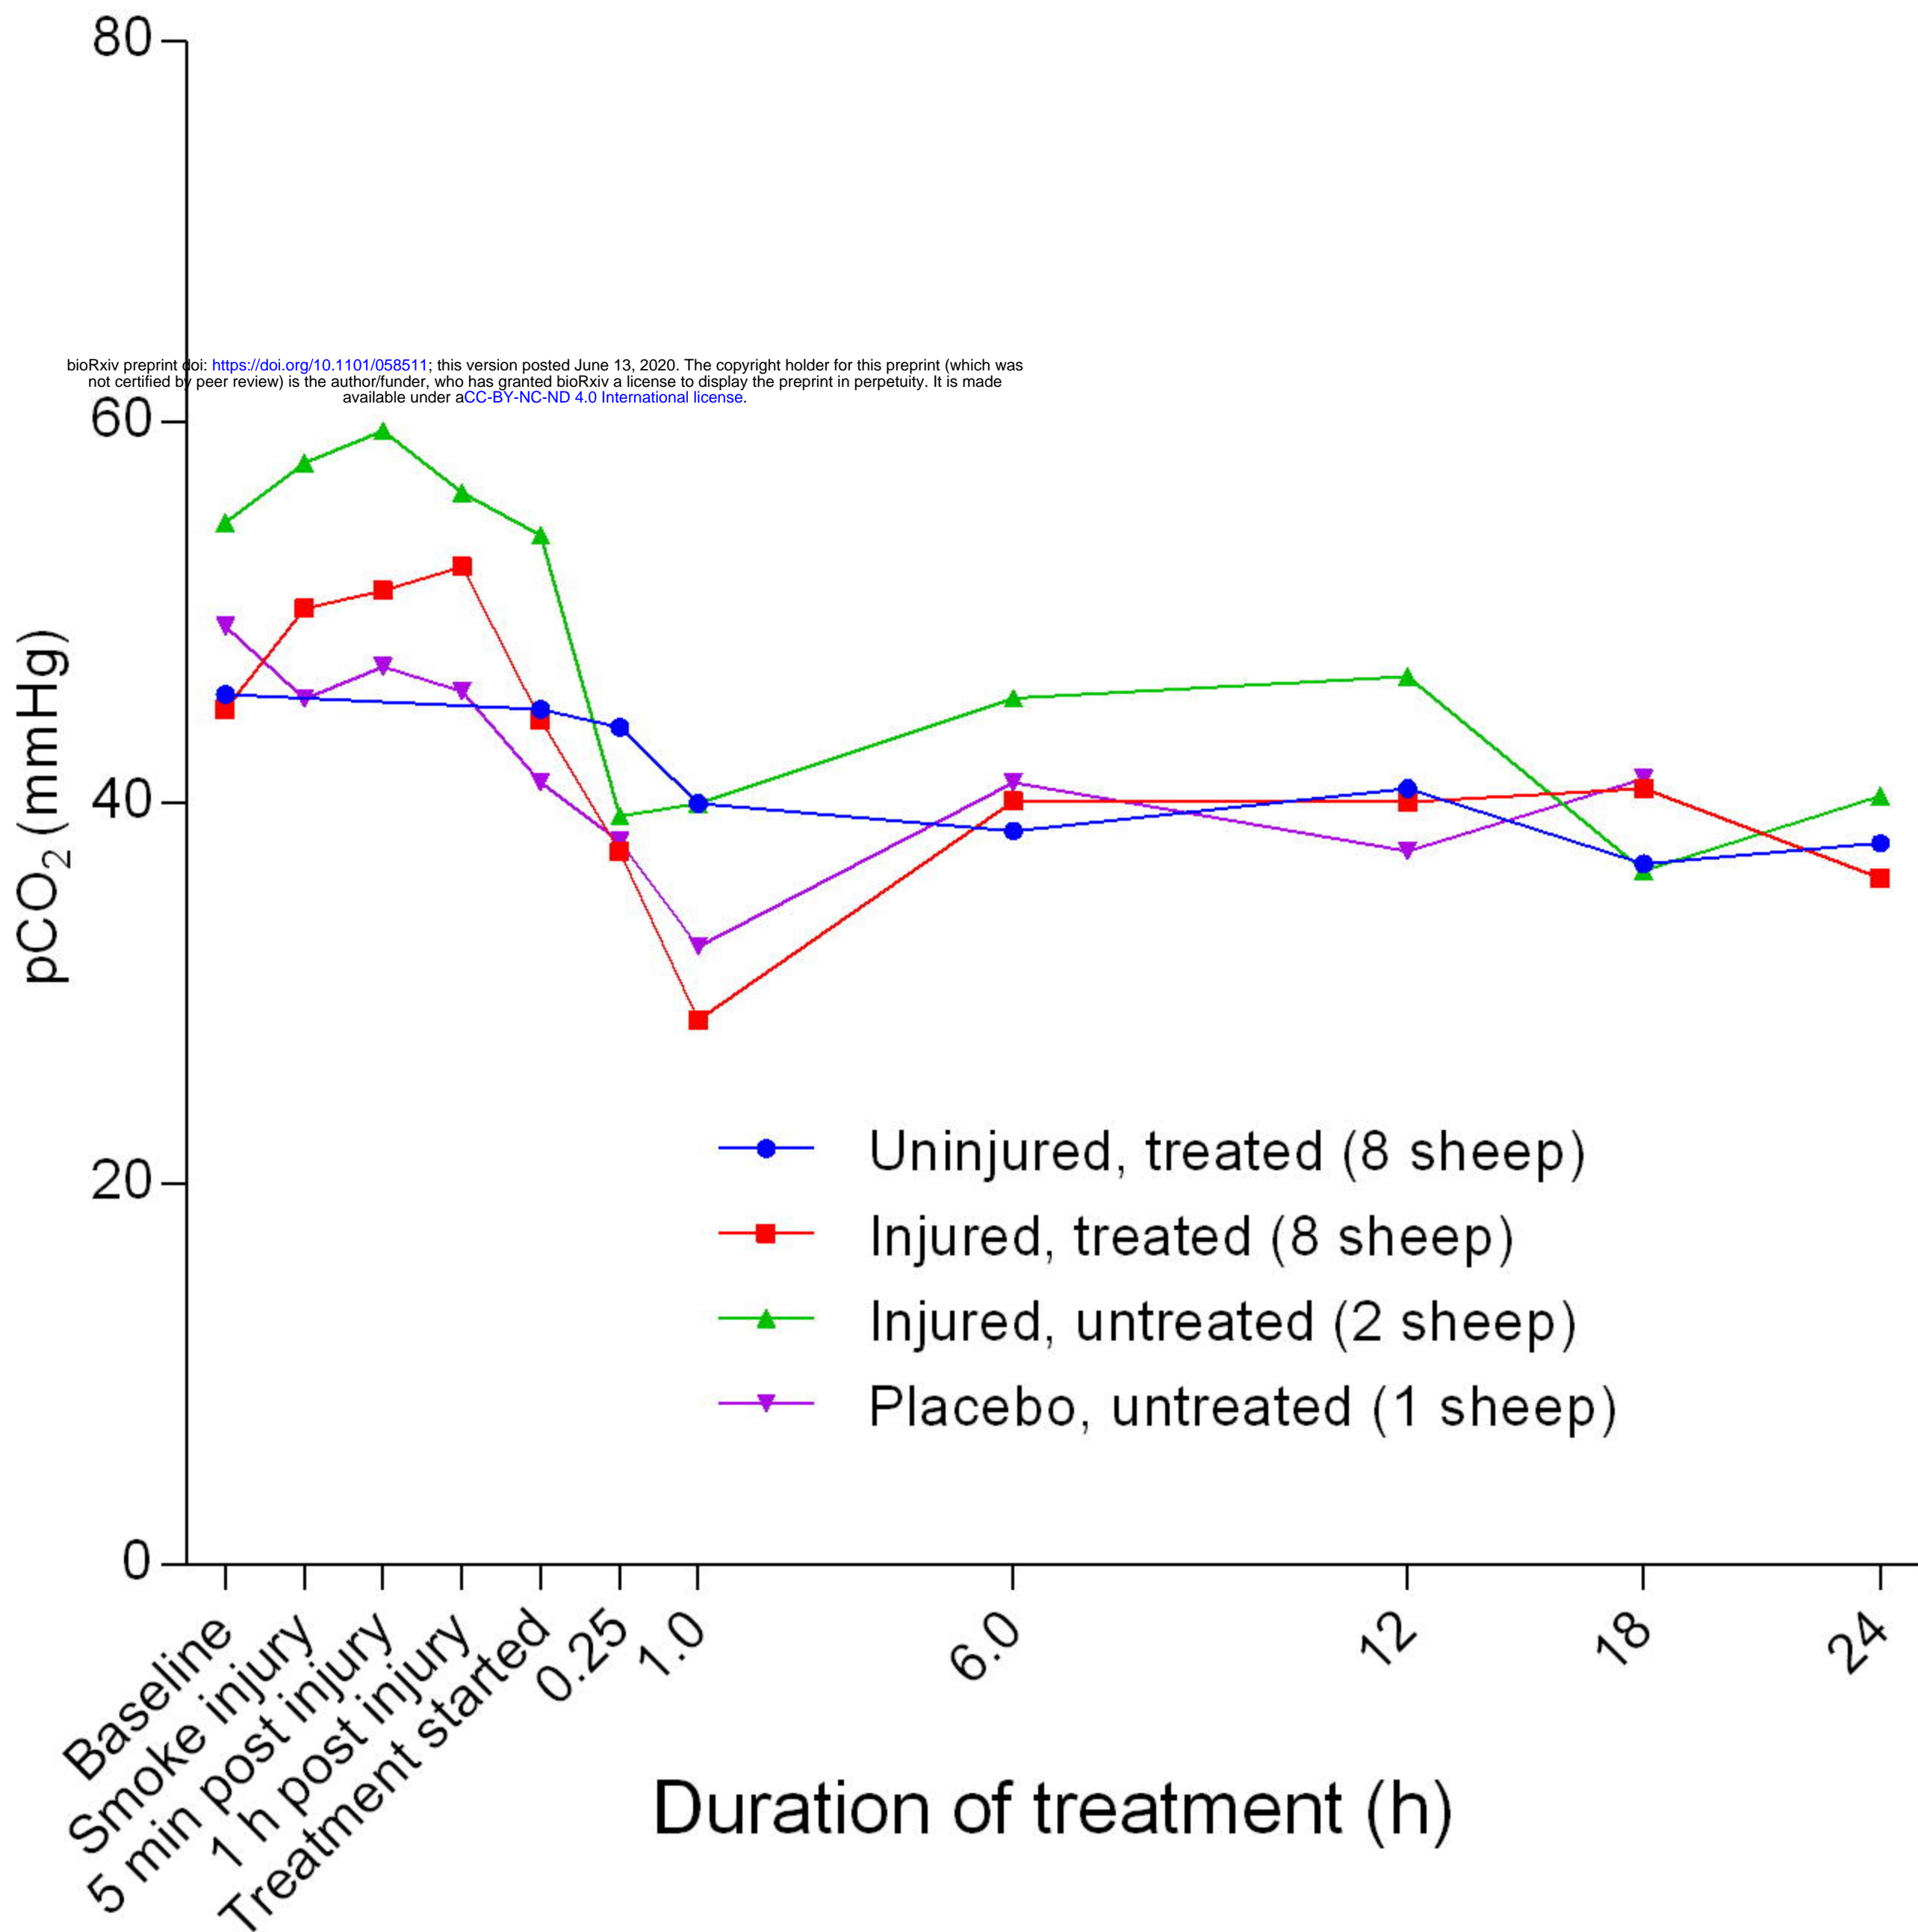



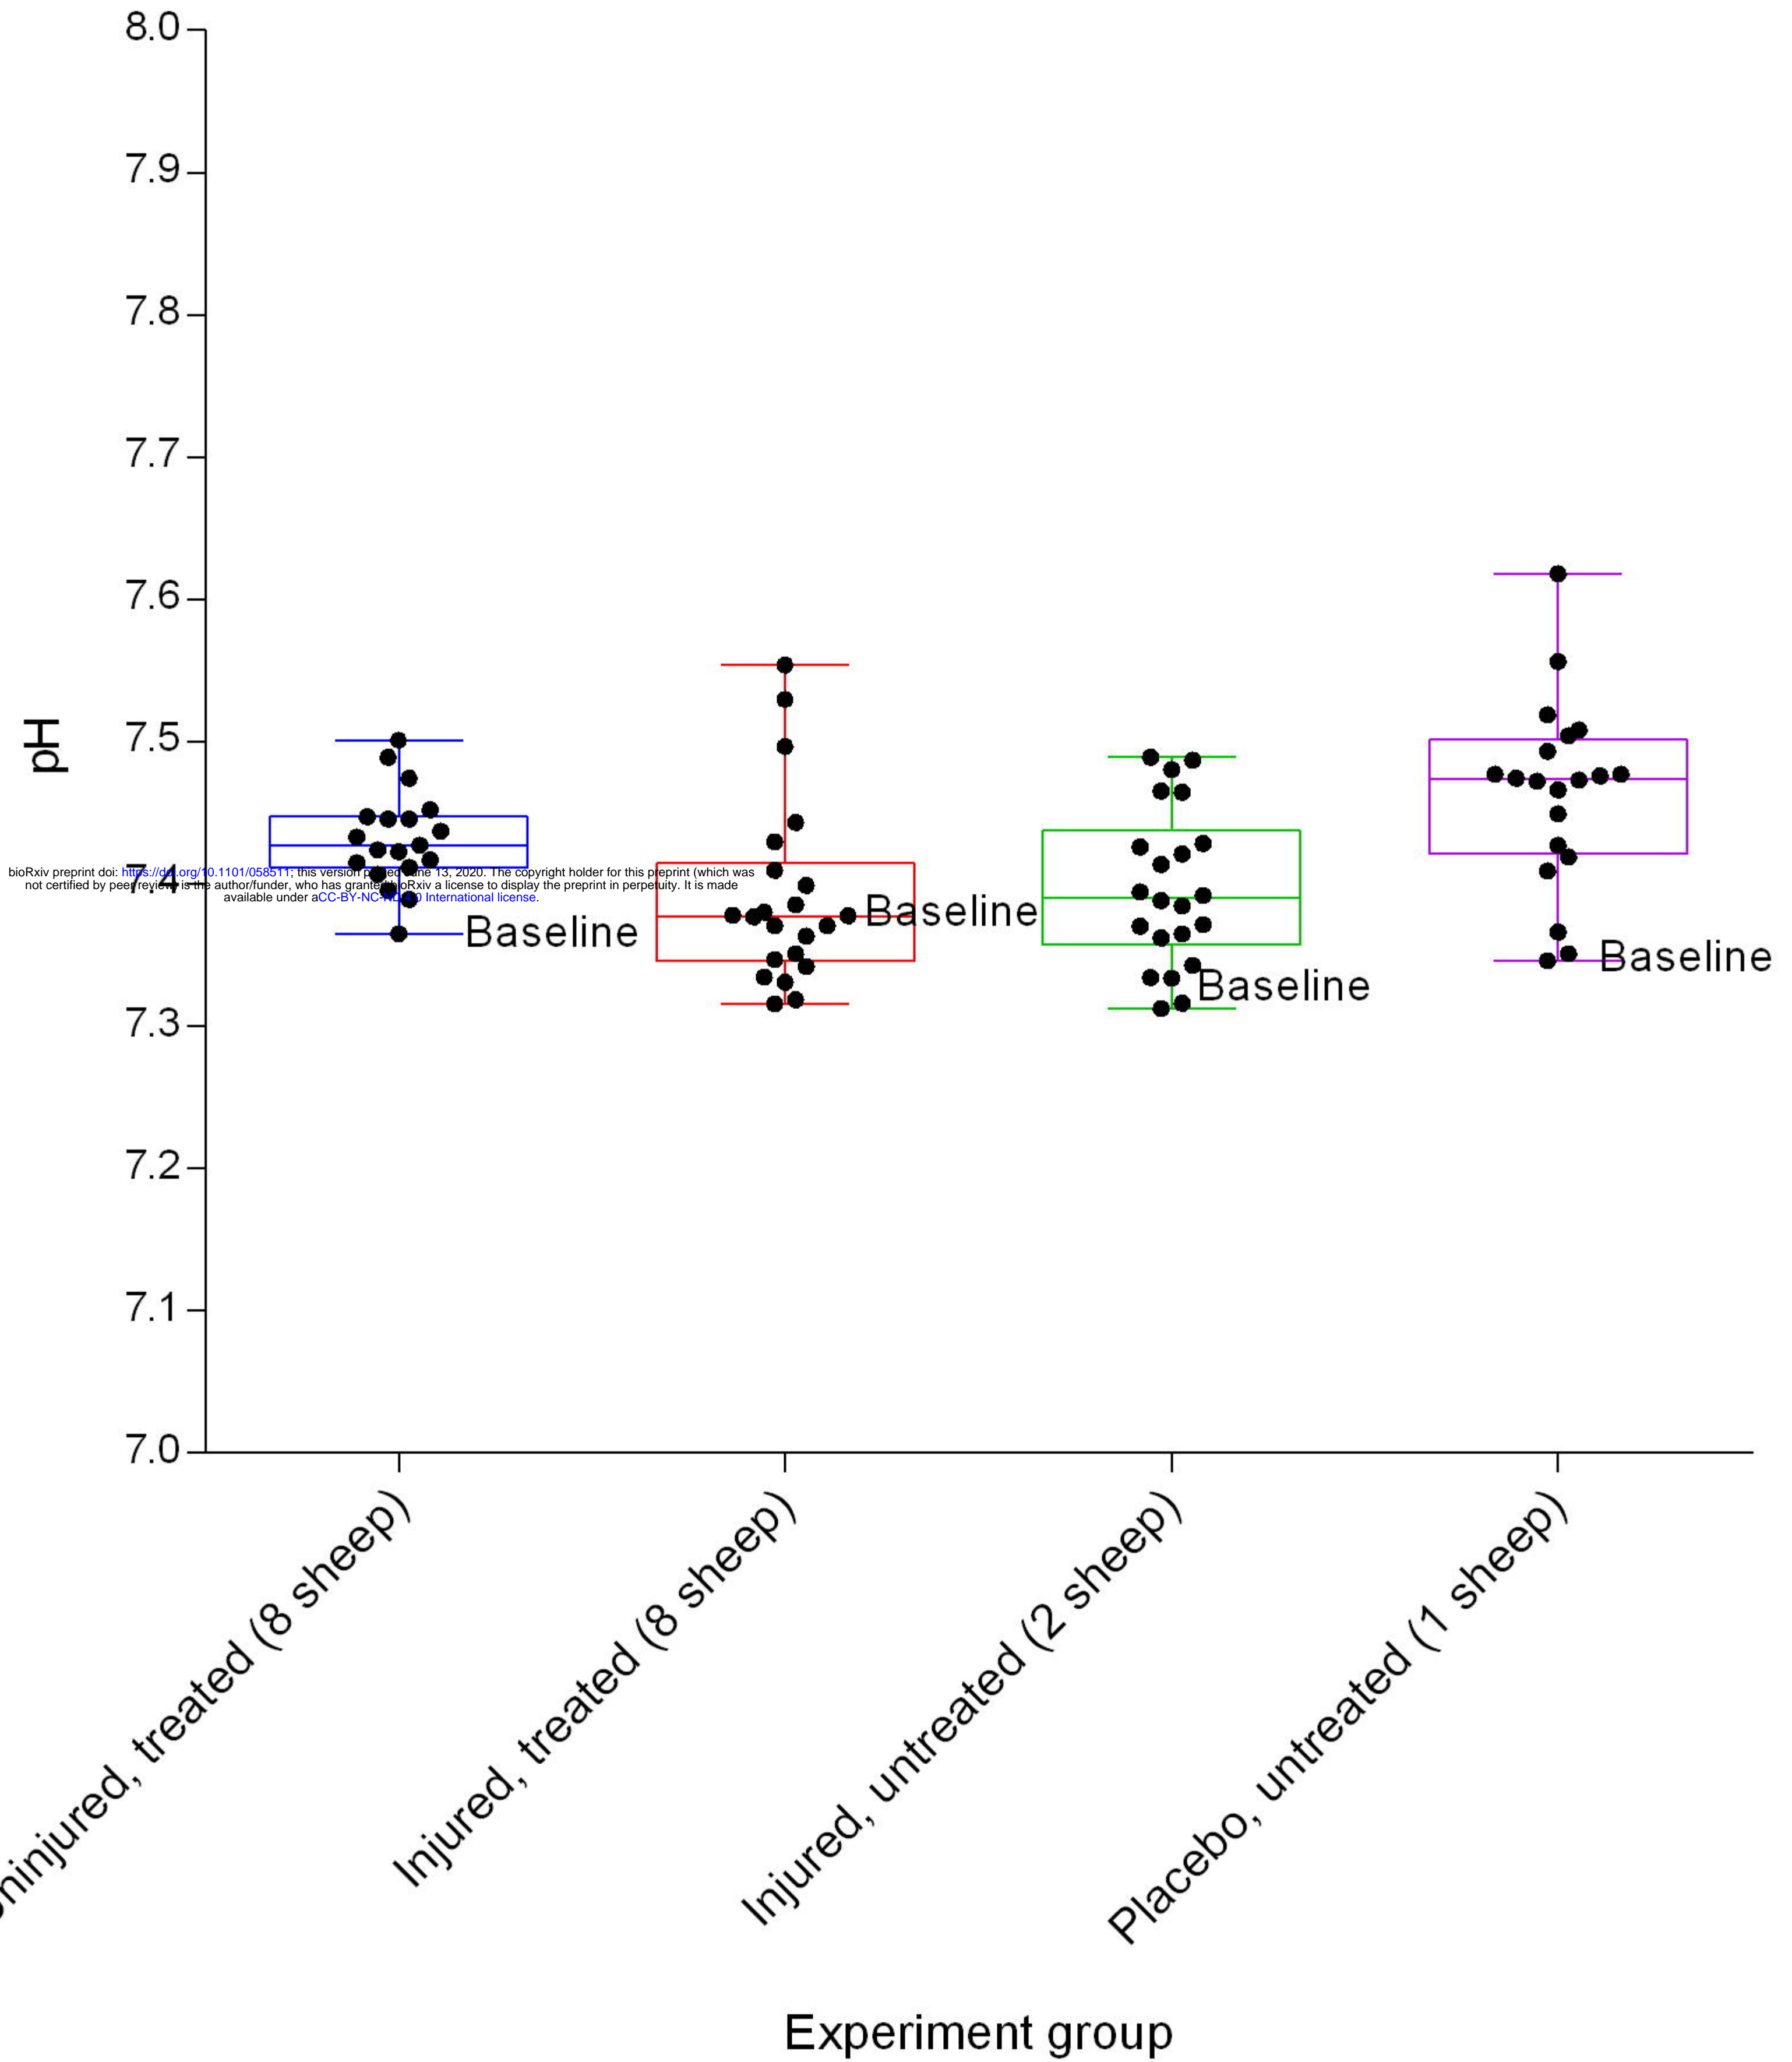

etCO<sub>2</sub> (mmHg)

- Uninjured, treated (8 sheep)
- Injured, treated (8 sheep)
- Injured, untreated (2 sheep)
- Placebo, untreated (1 sheep)

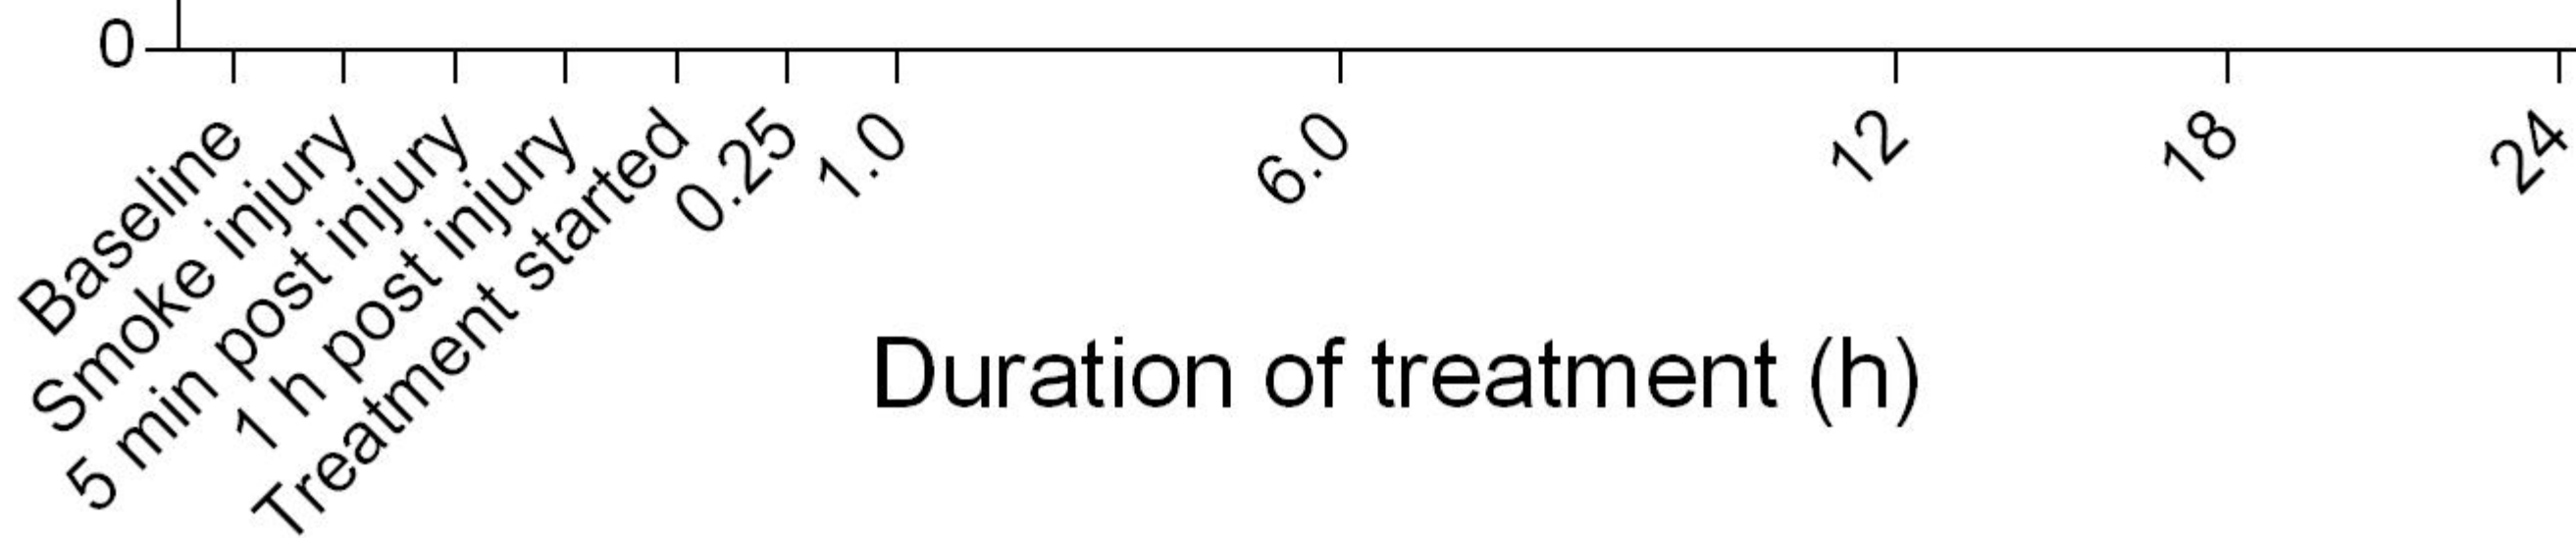

Duration of treatment (h)

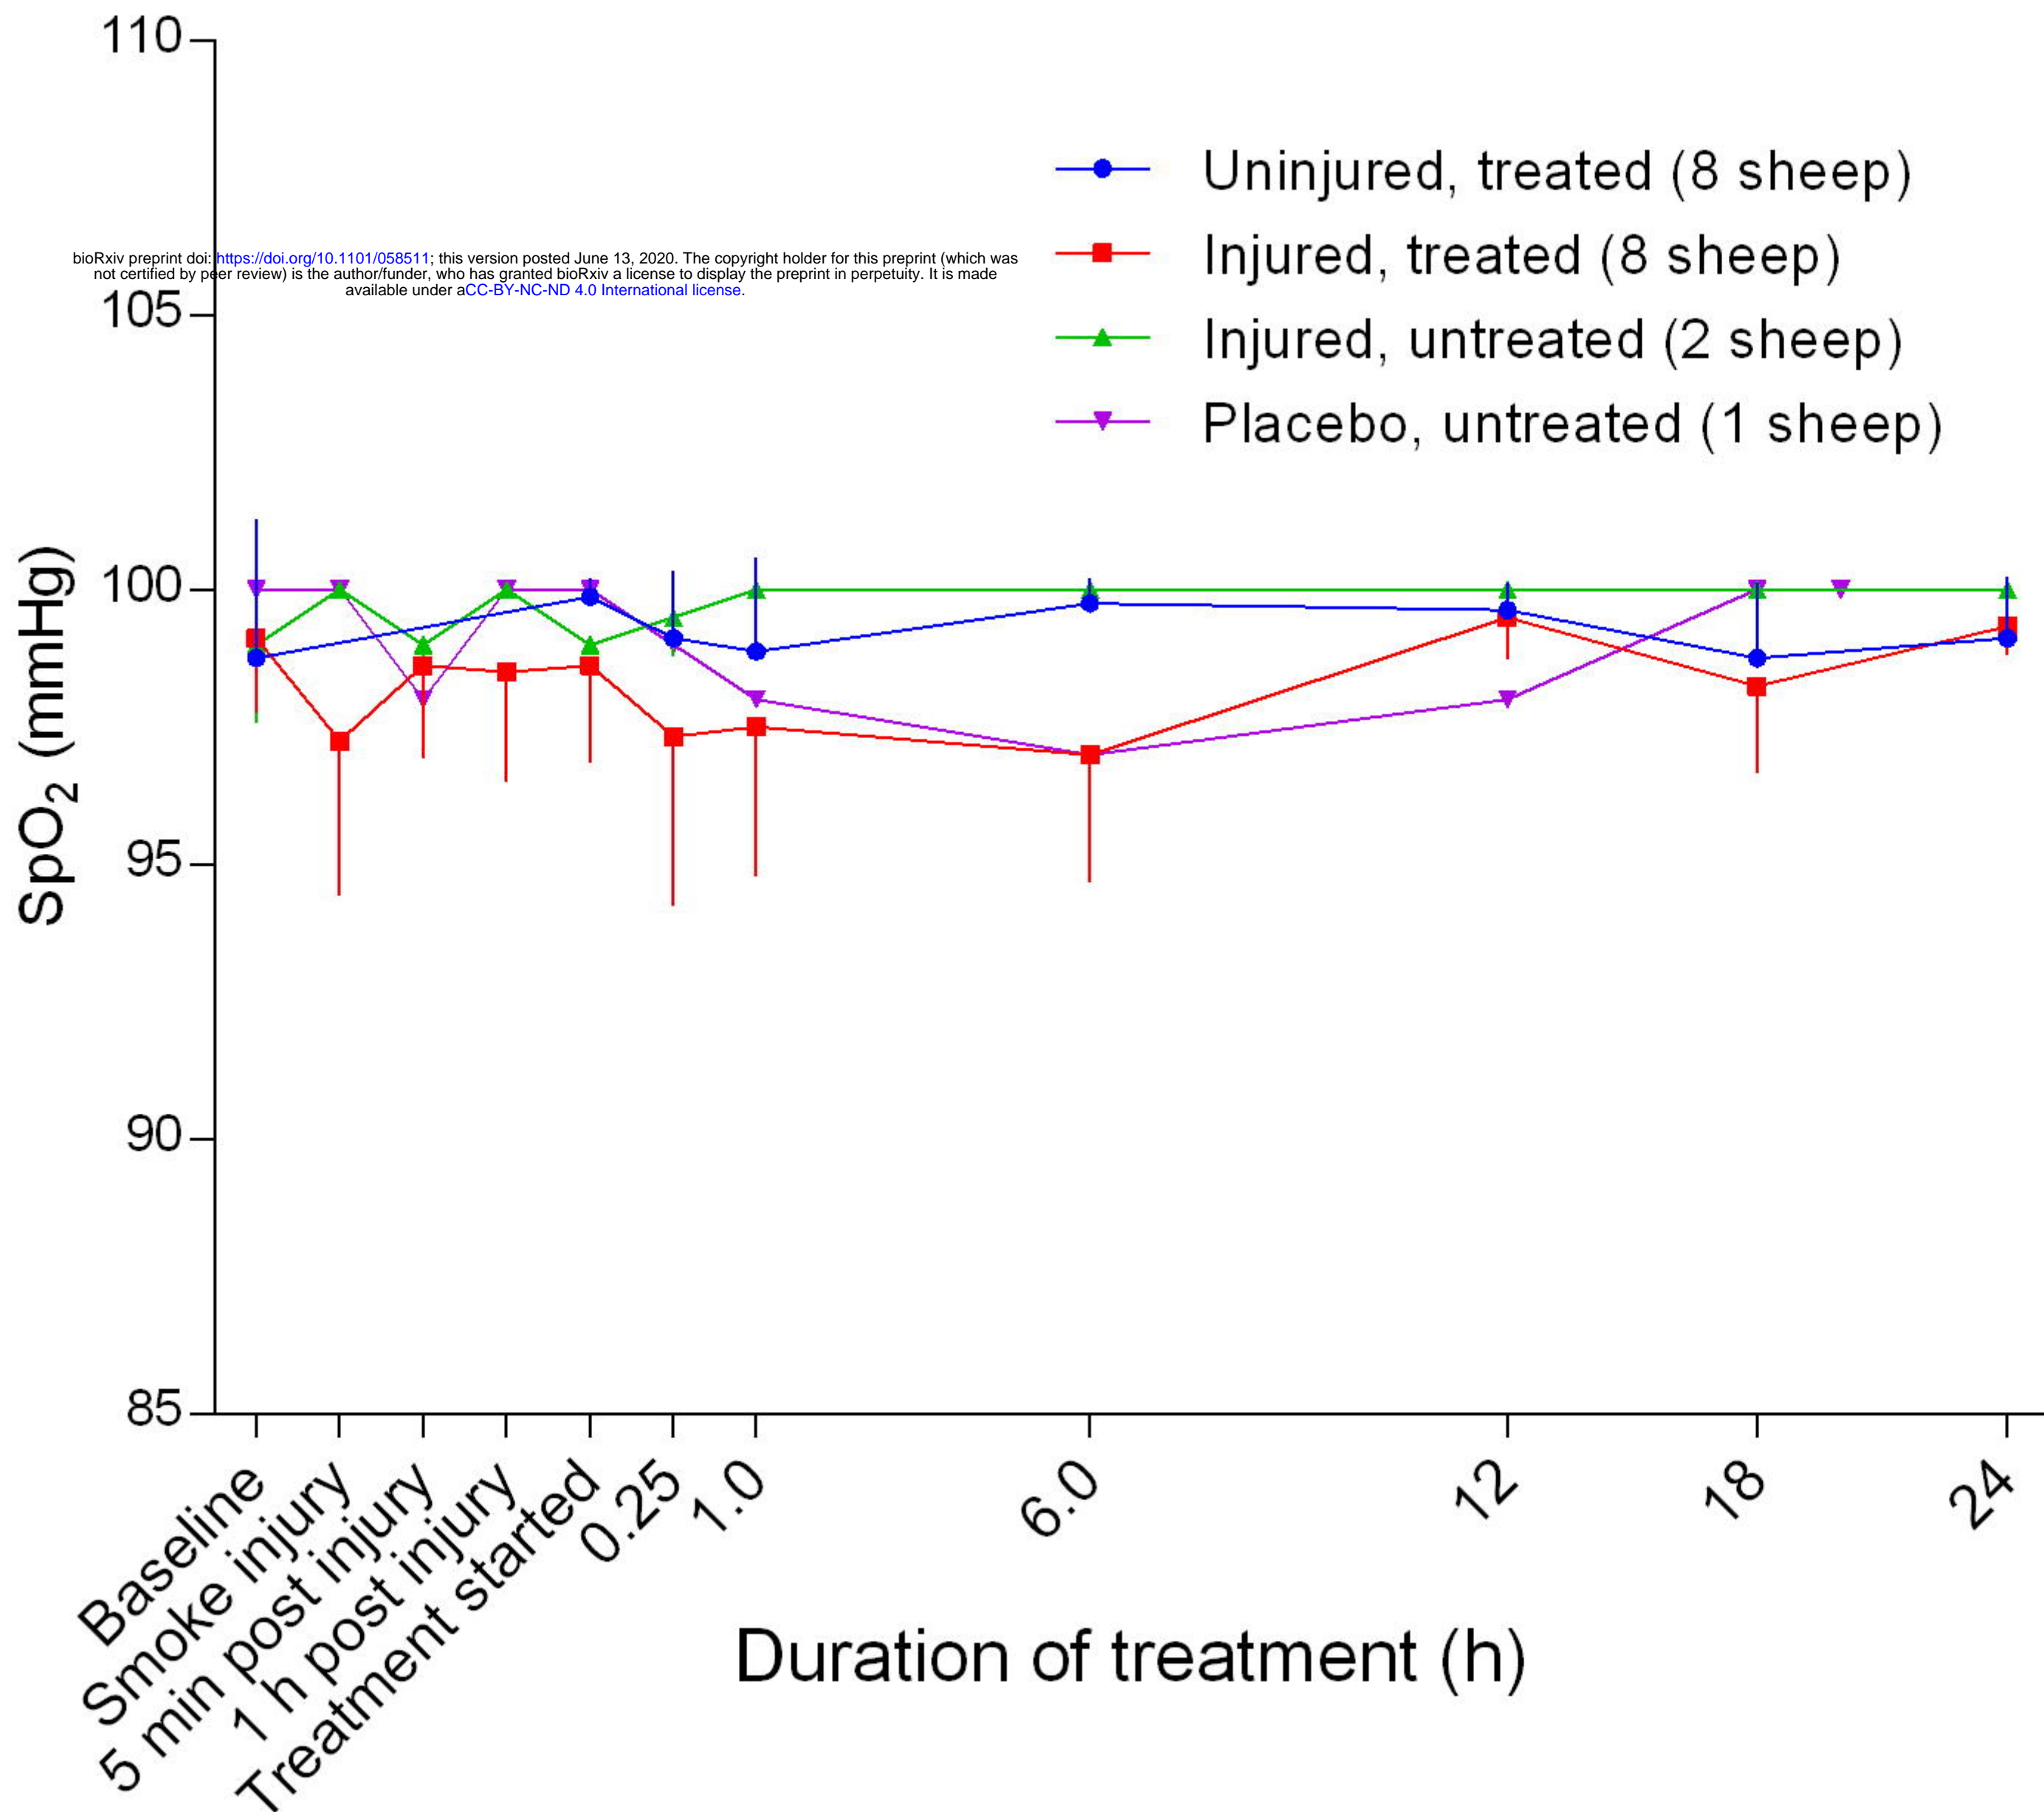



bioRxiv preprint doi: <https://doi.org/10.1101/058511>; this version posted June 13, 2020. The copyright holder for this preprint (which was not certified by peer review) is the author/funder, who has granted bioRxiv a license to display the preprint in perpetuity. It is made available under aCC-BY-NC-ND 4.0 International license.

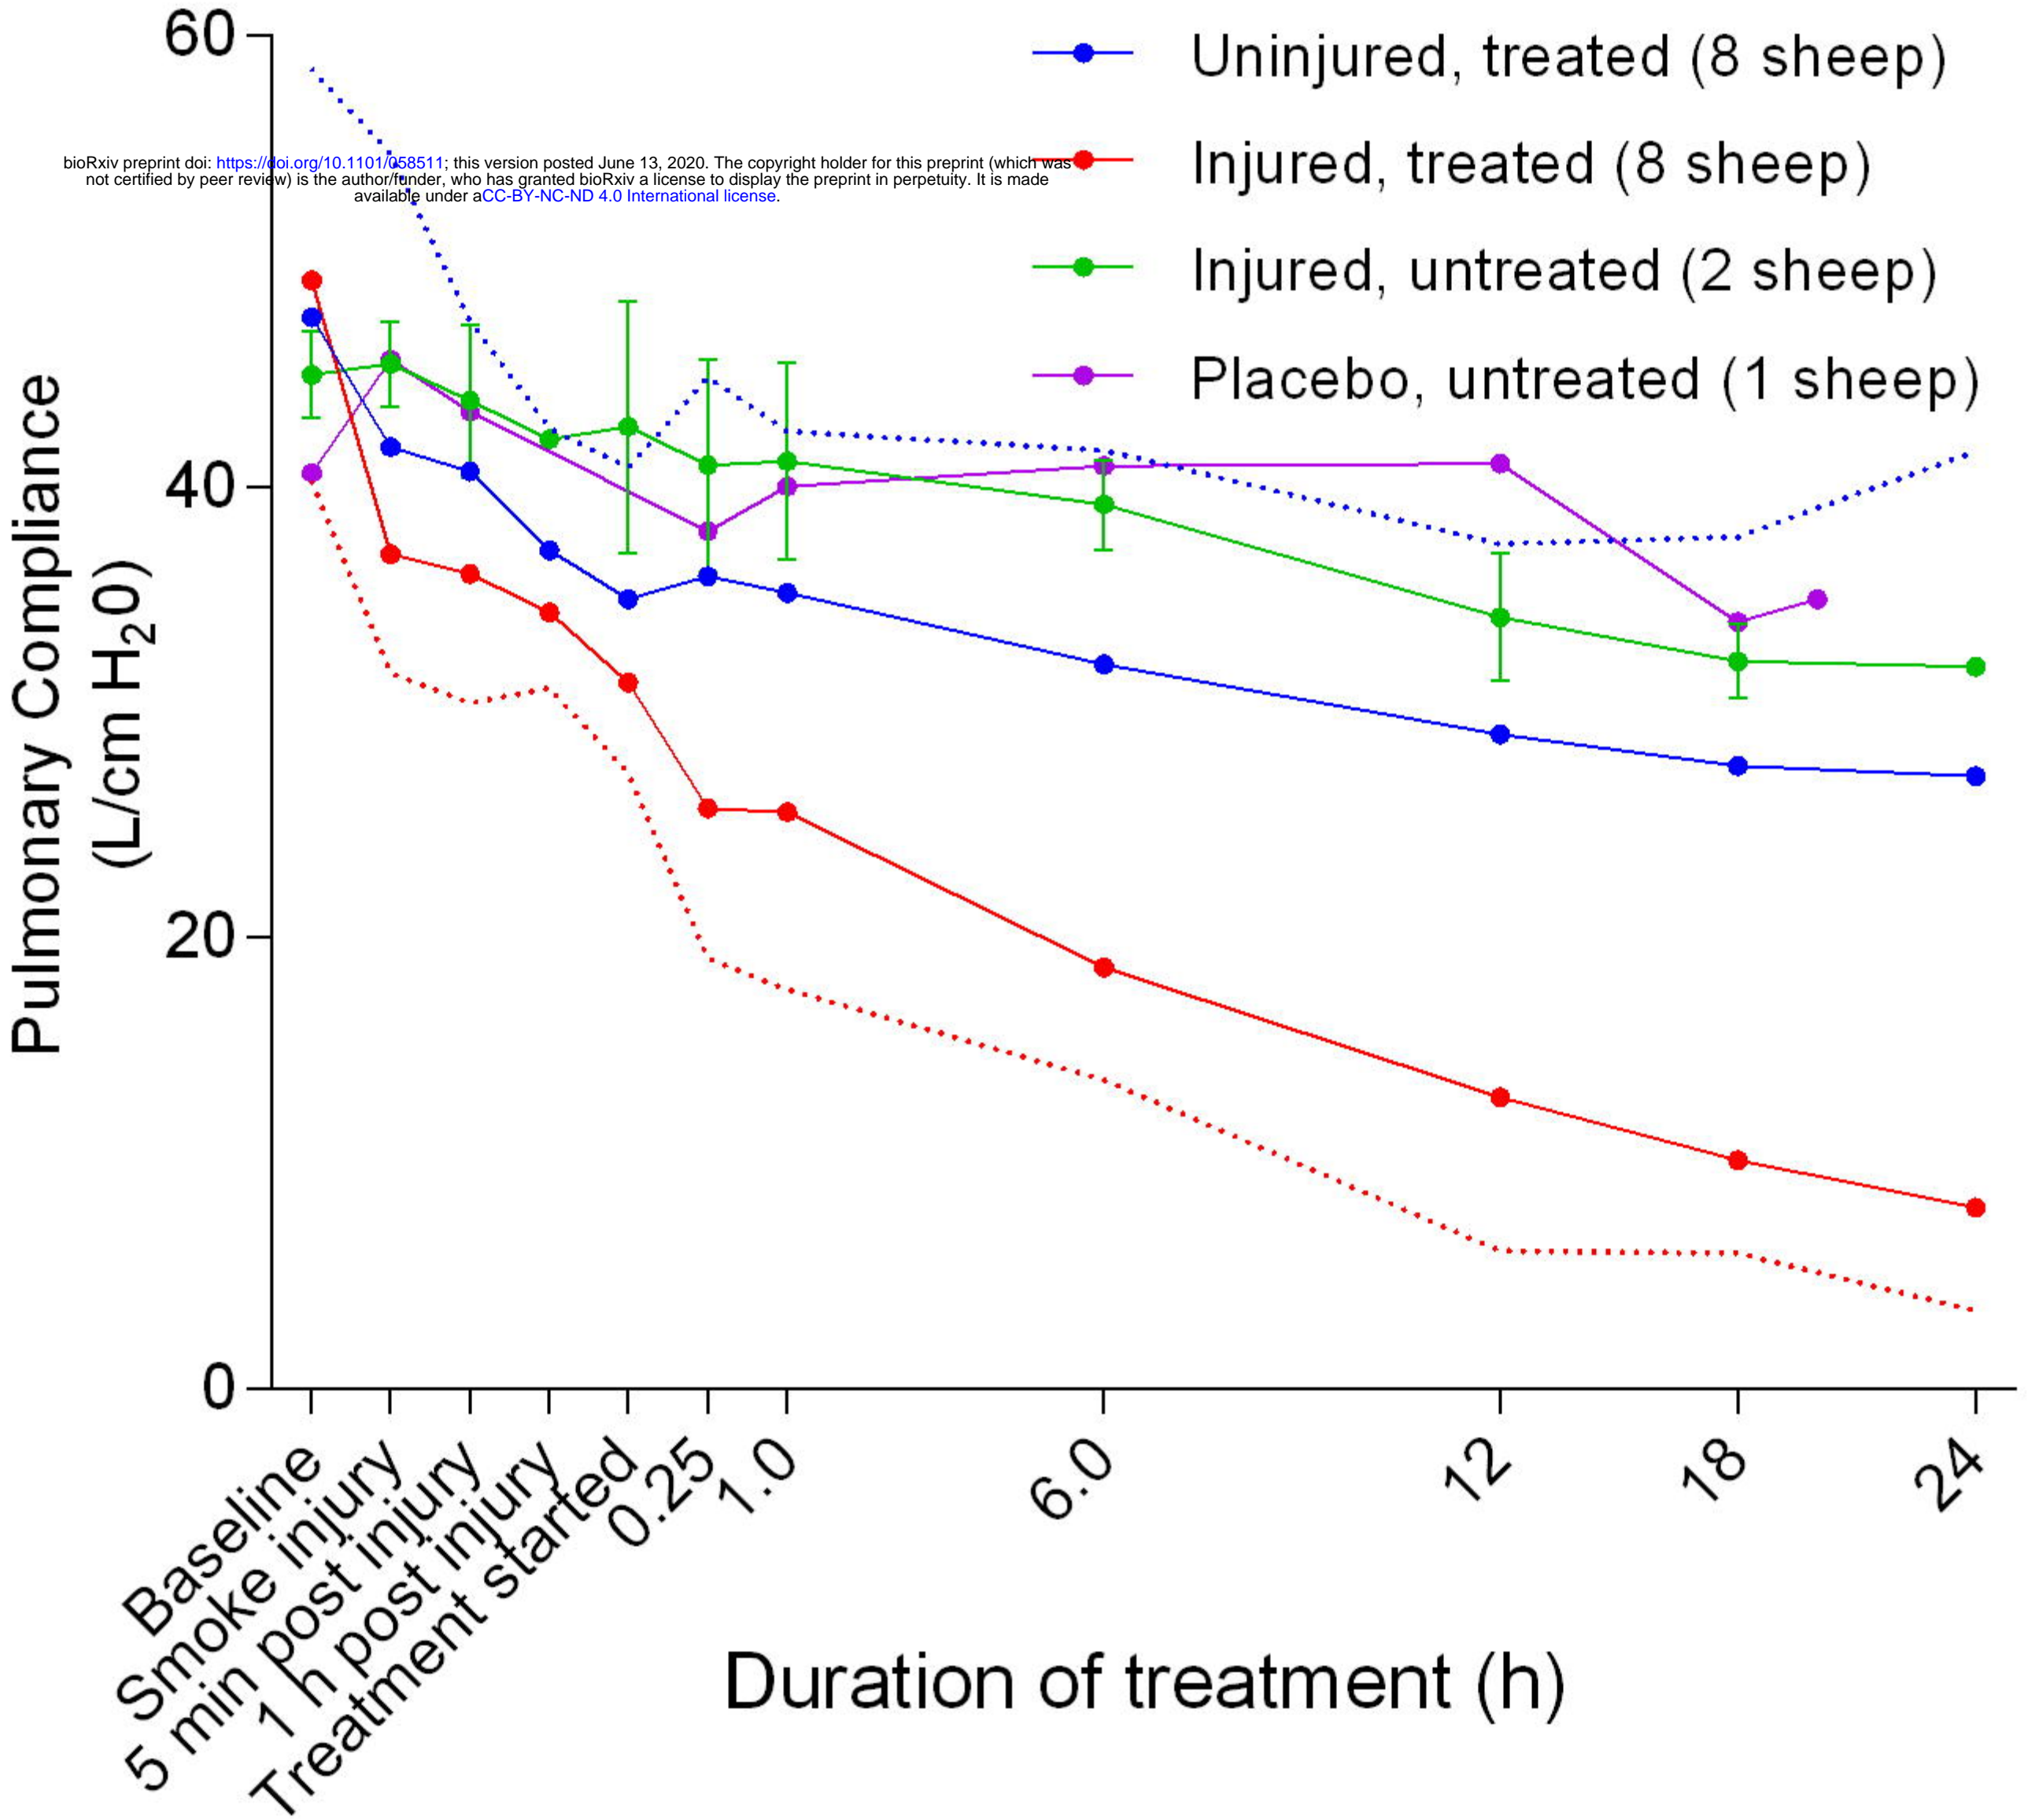

bioRxiv preprint doi: <https://doi.org/10.1101/058511>; this version posted June 13, 2020. The copyright holder for this preprint (which was not certified by peer review) is the author/funder, who has granted bioRxiv a license to display the preprint in perpetuity. It is made available under aCC-BY-NC-ND 4.0 International license.

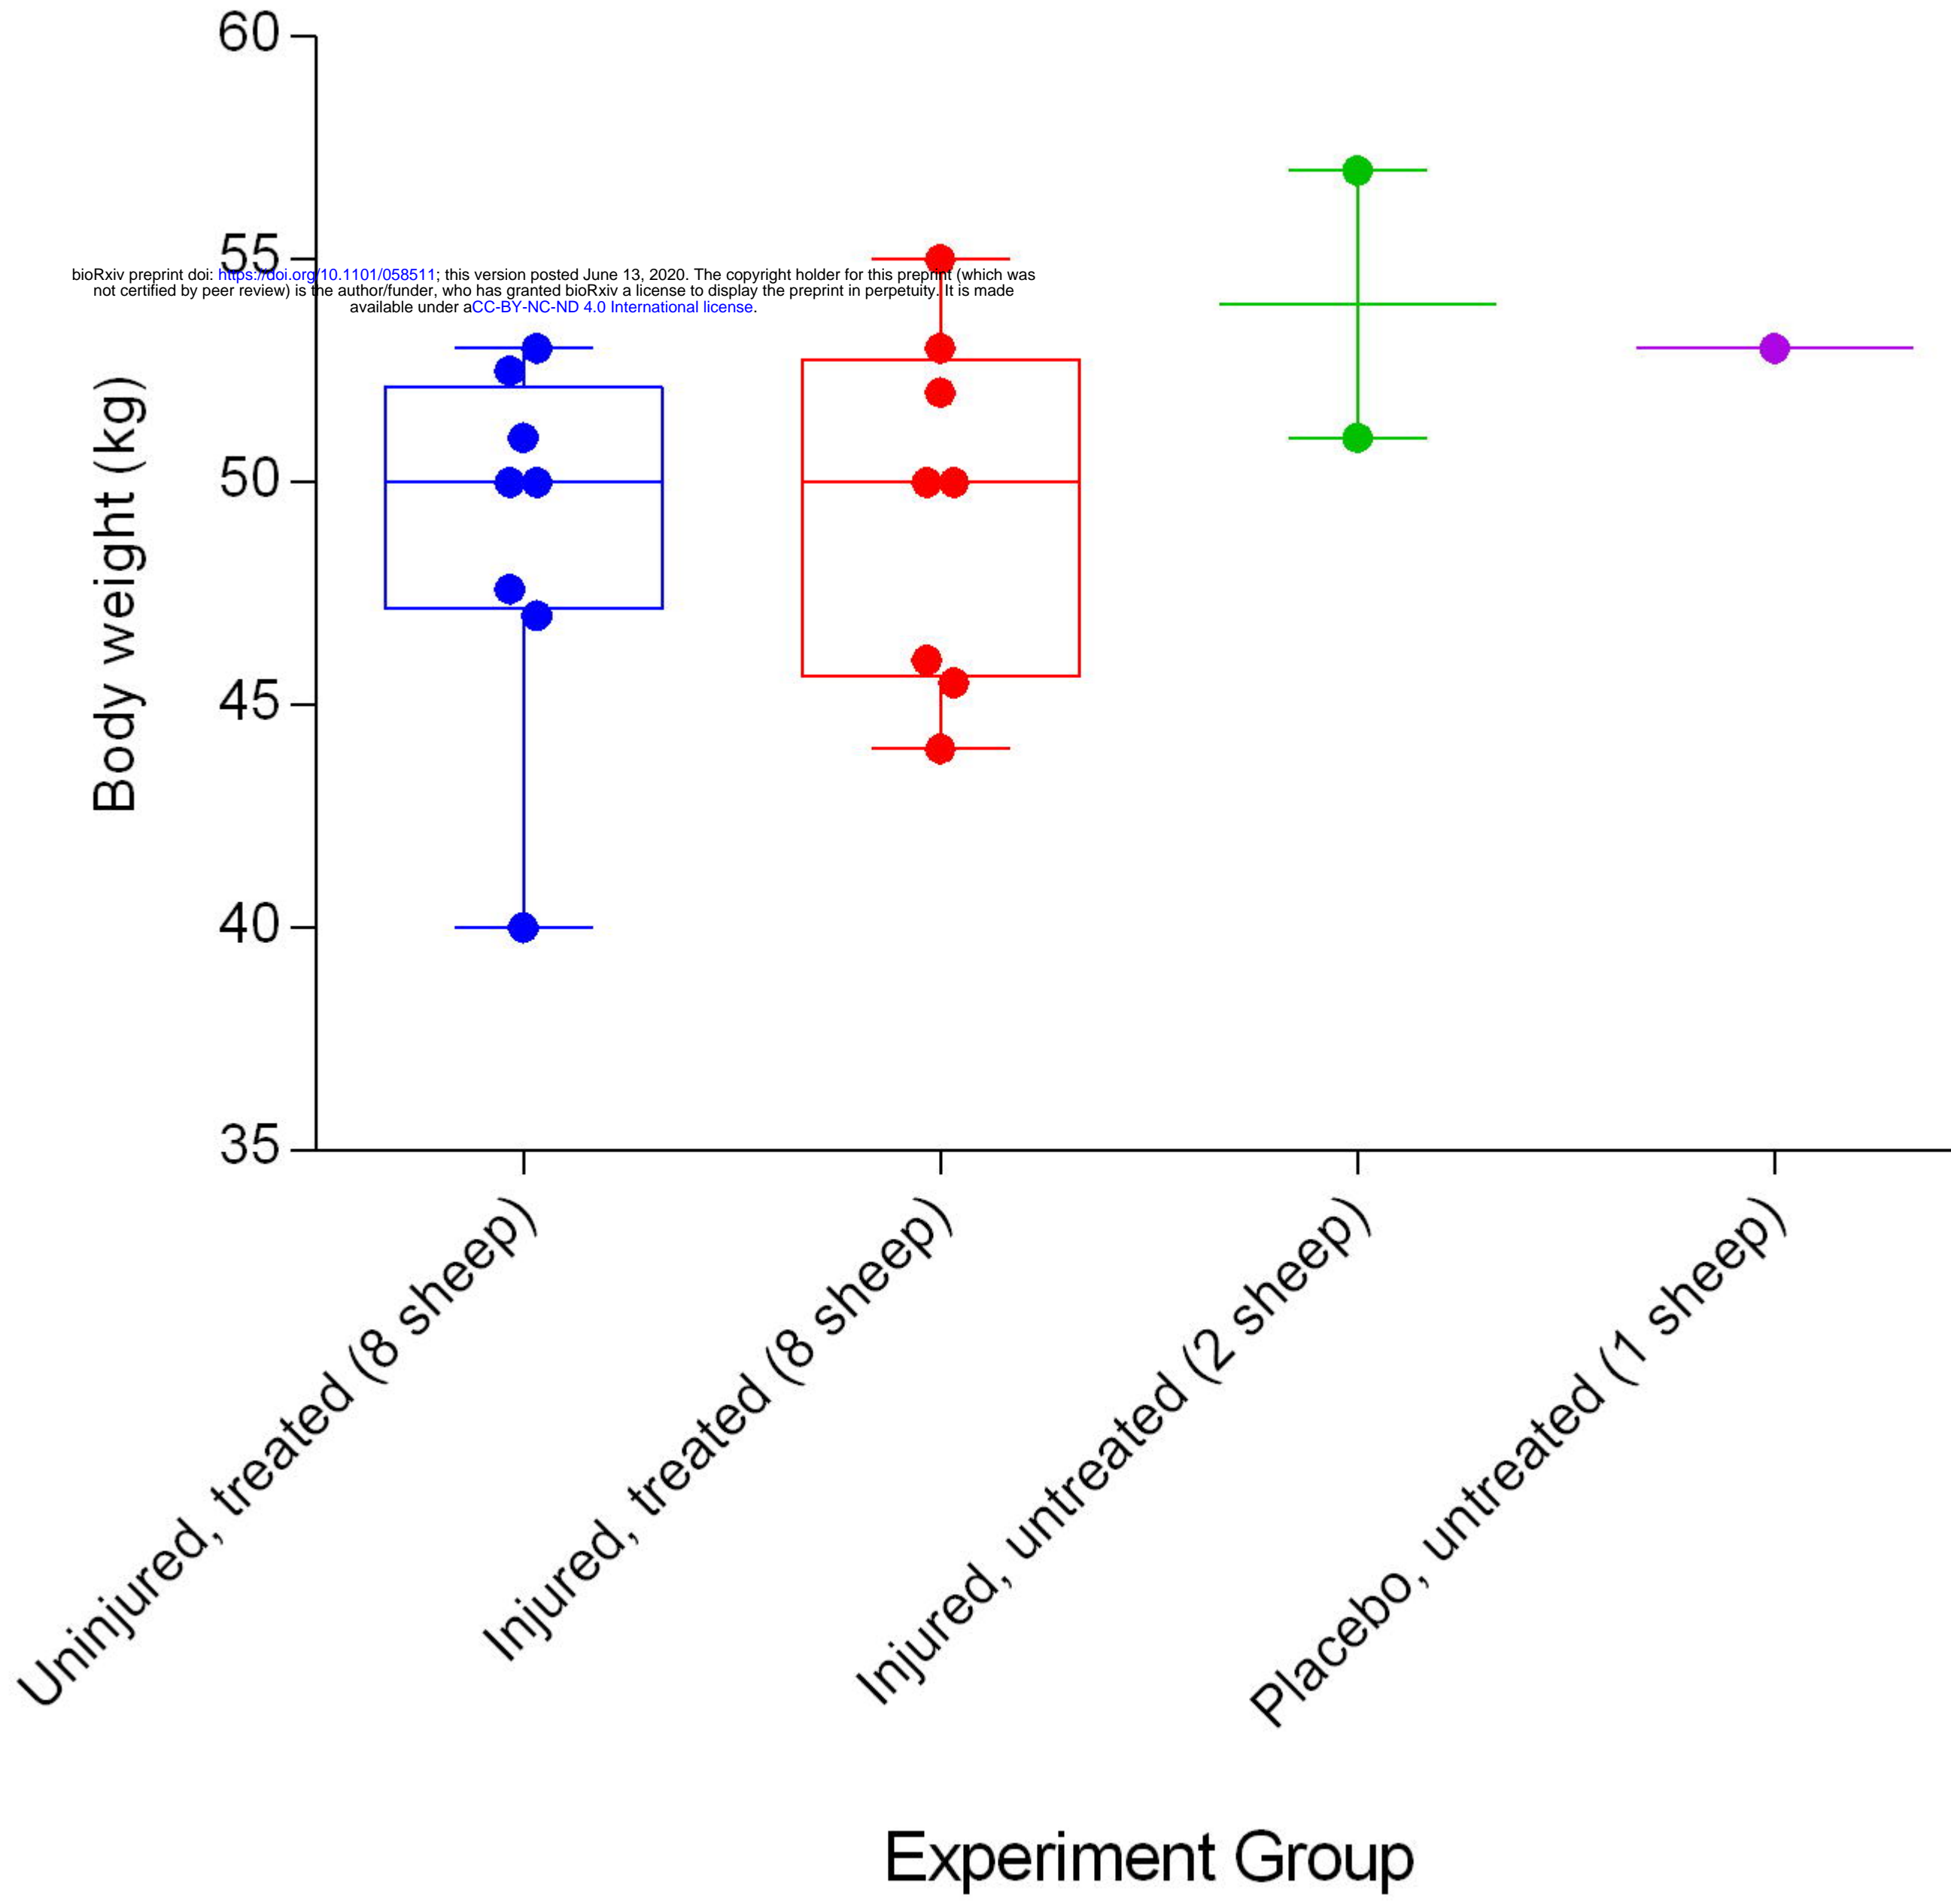

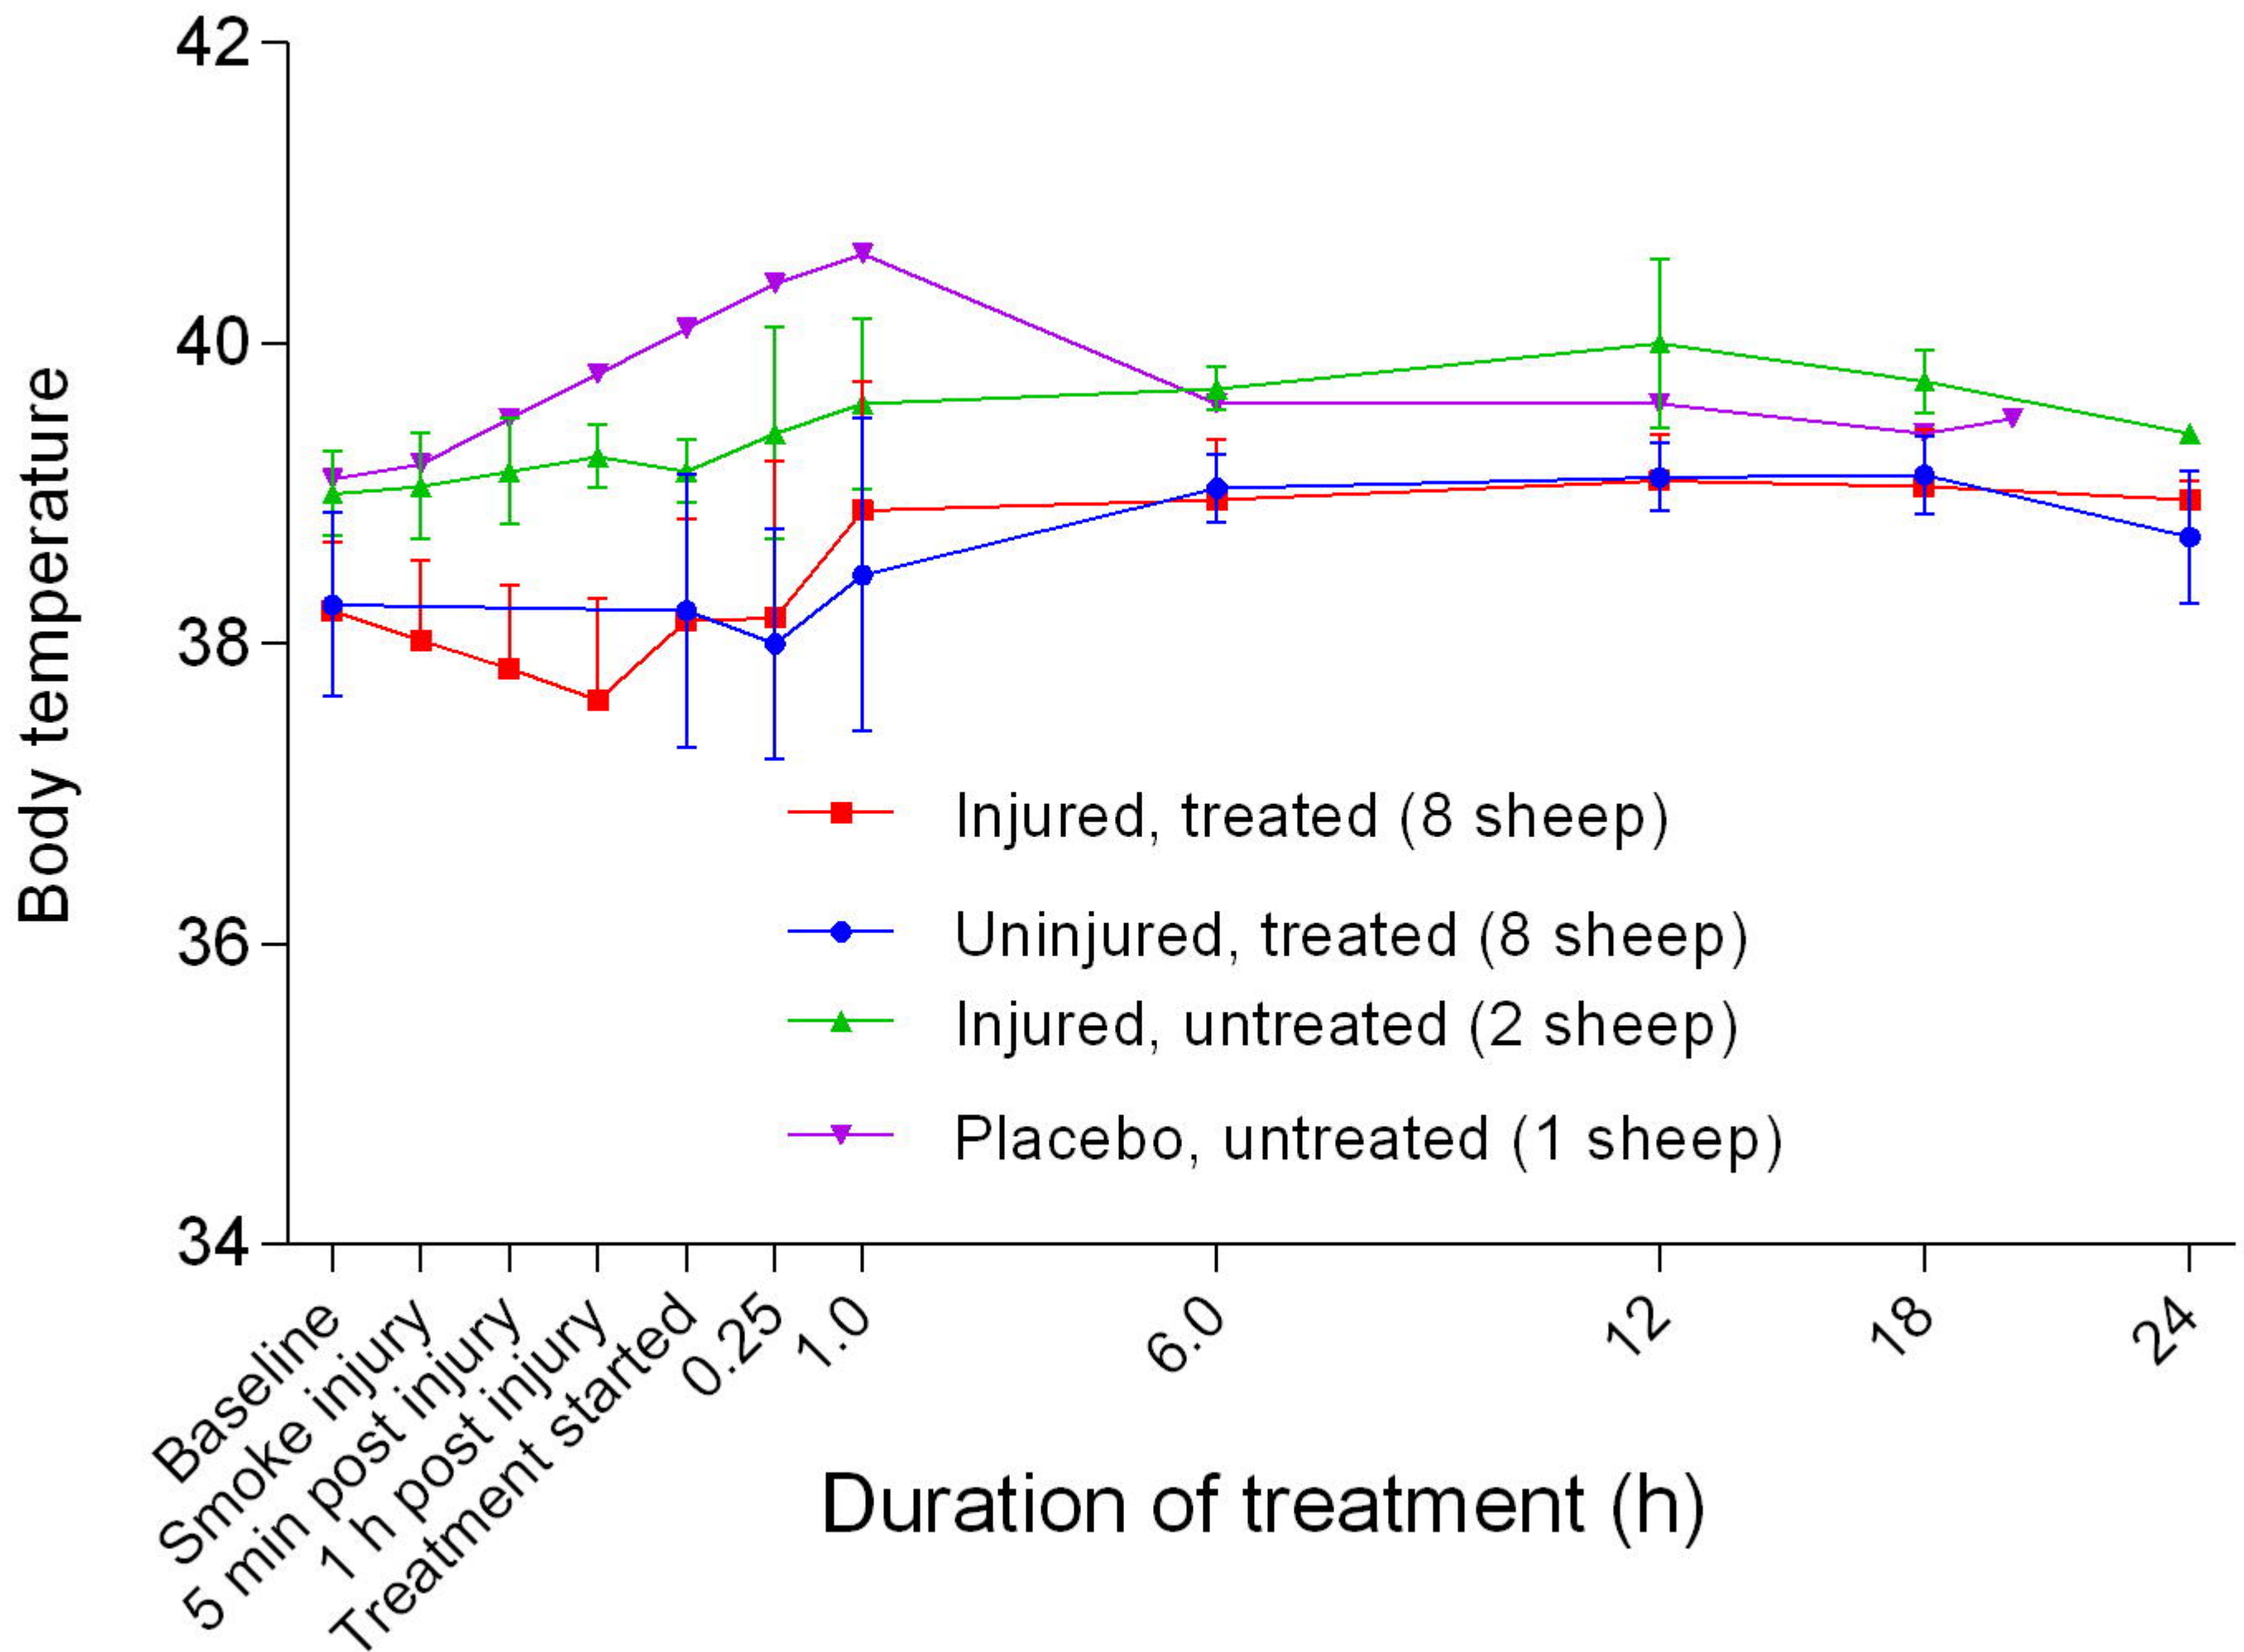

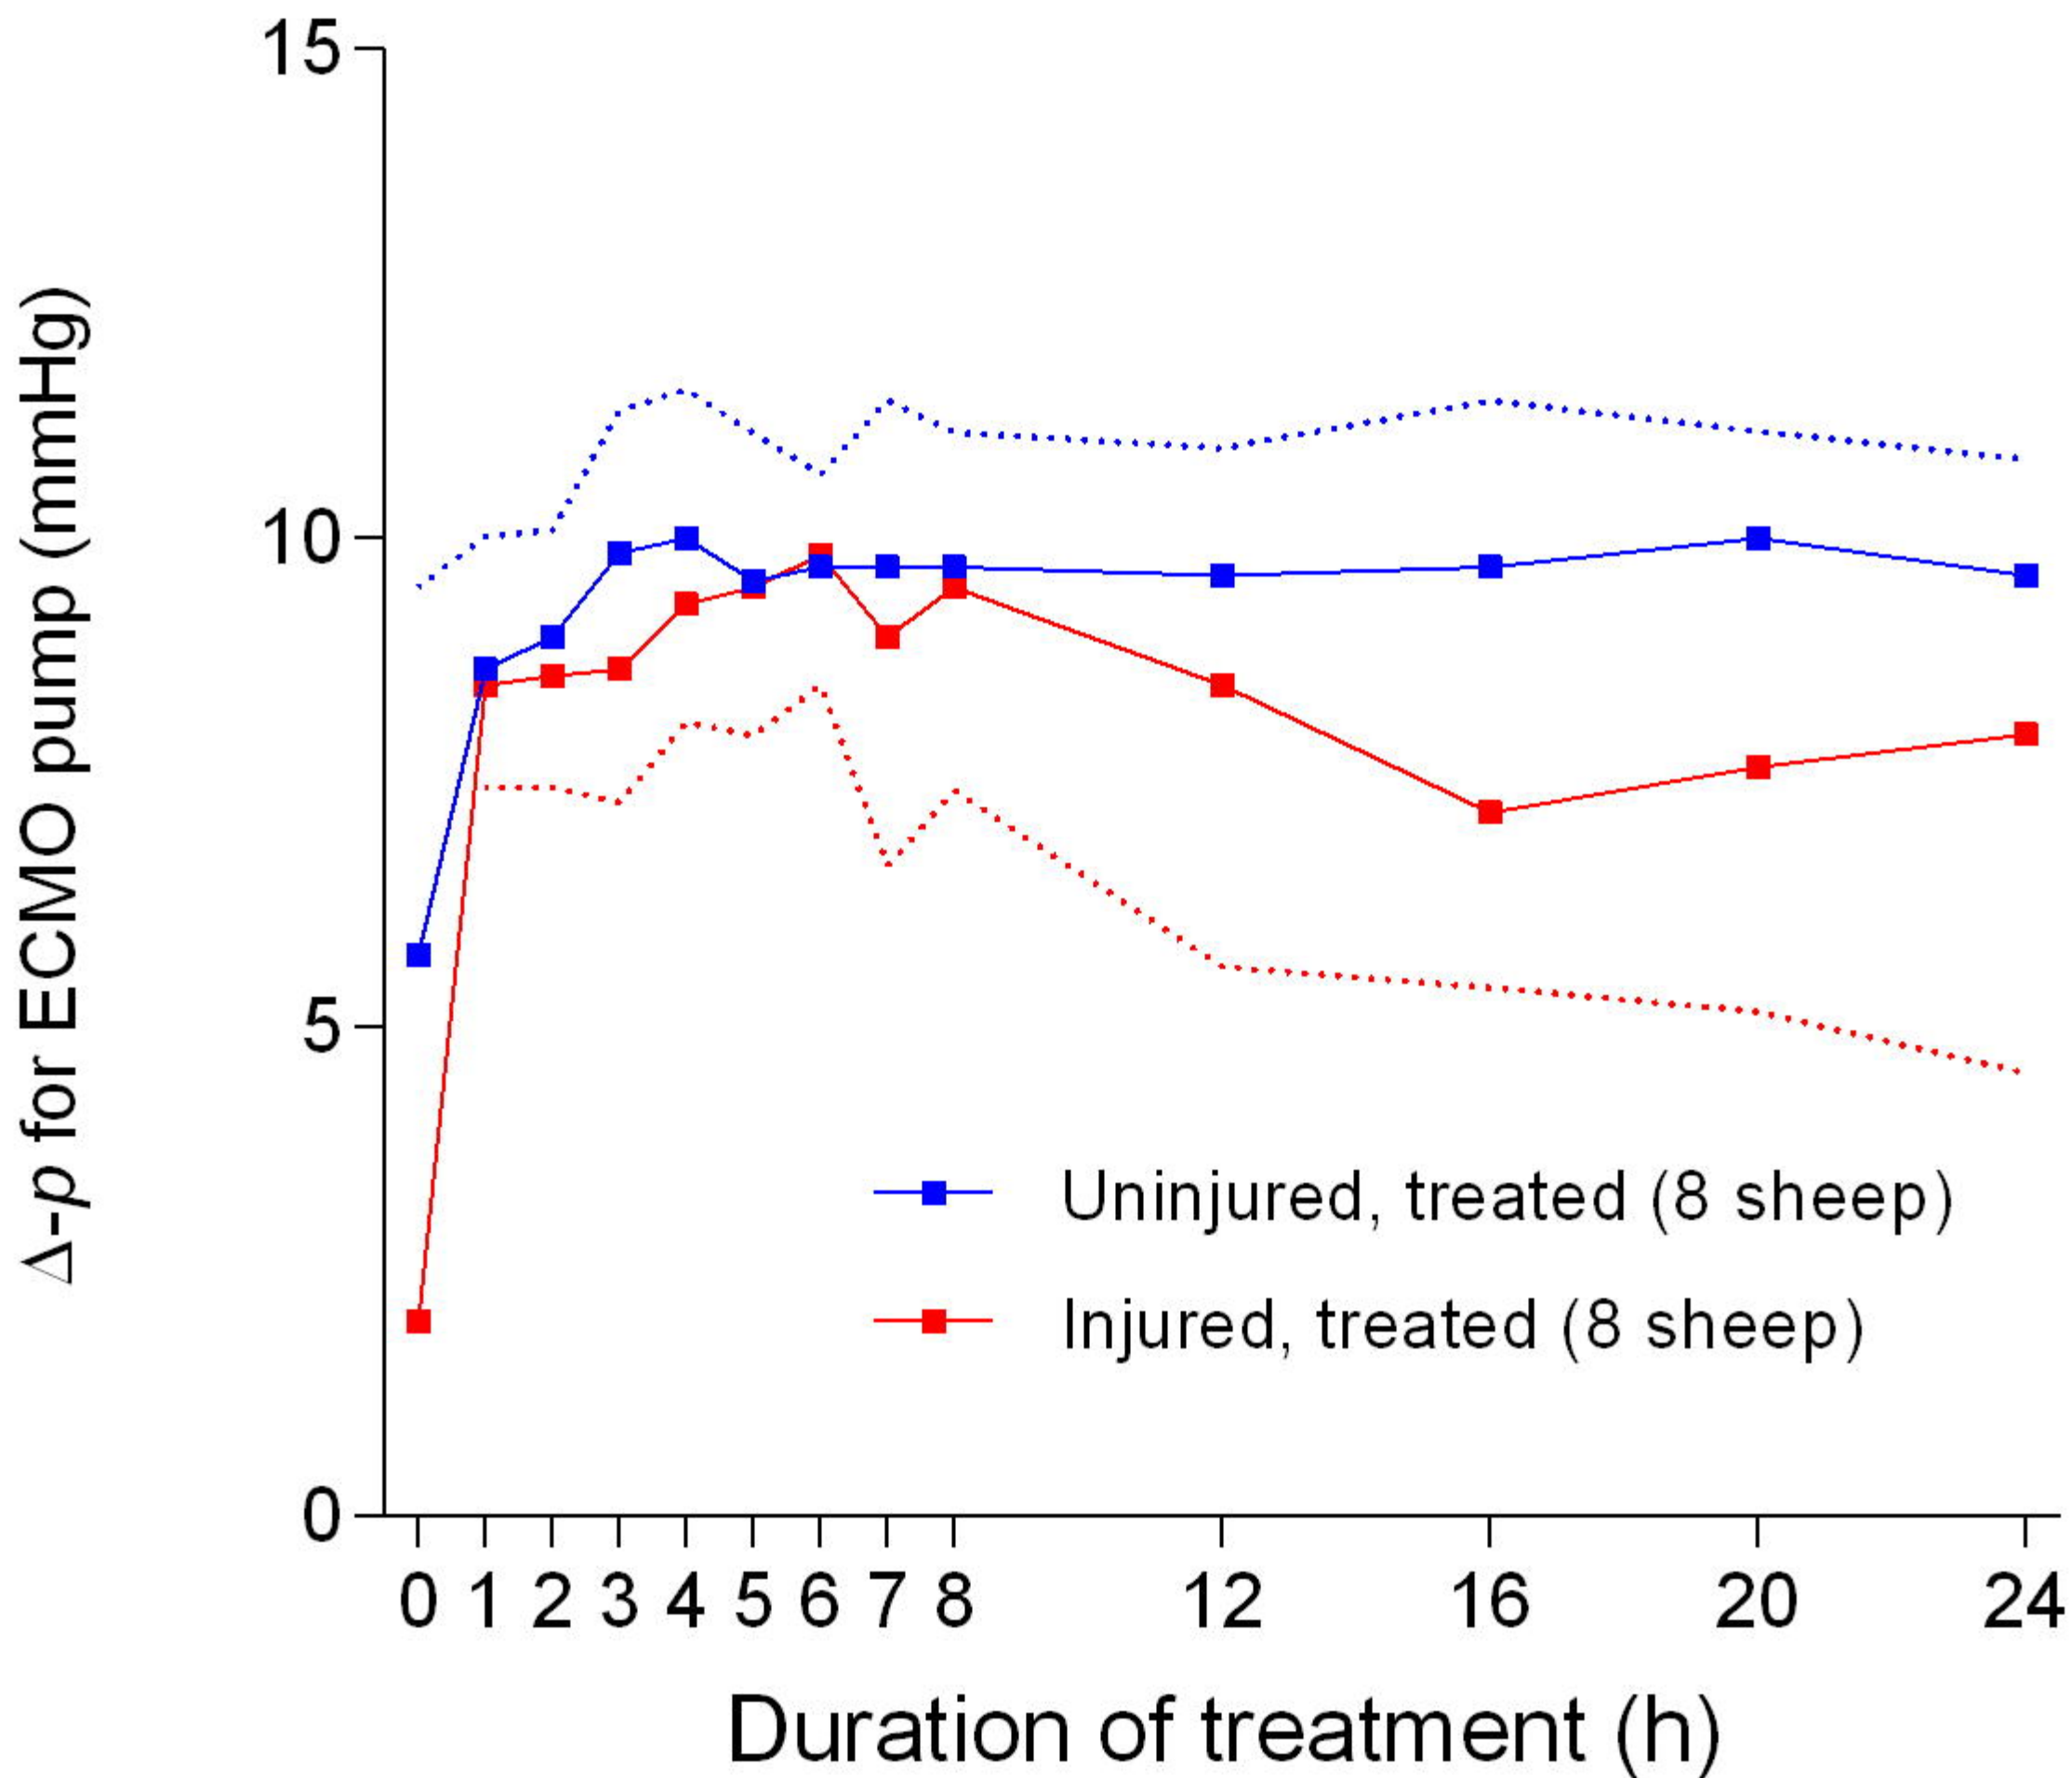



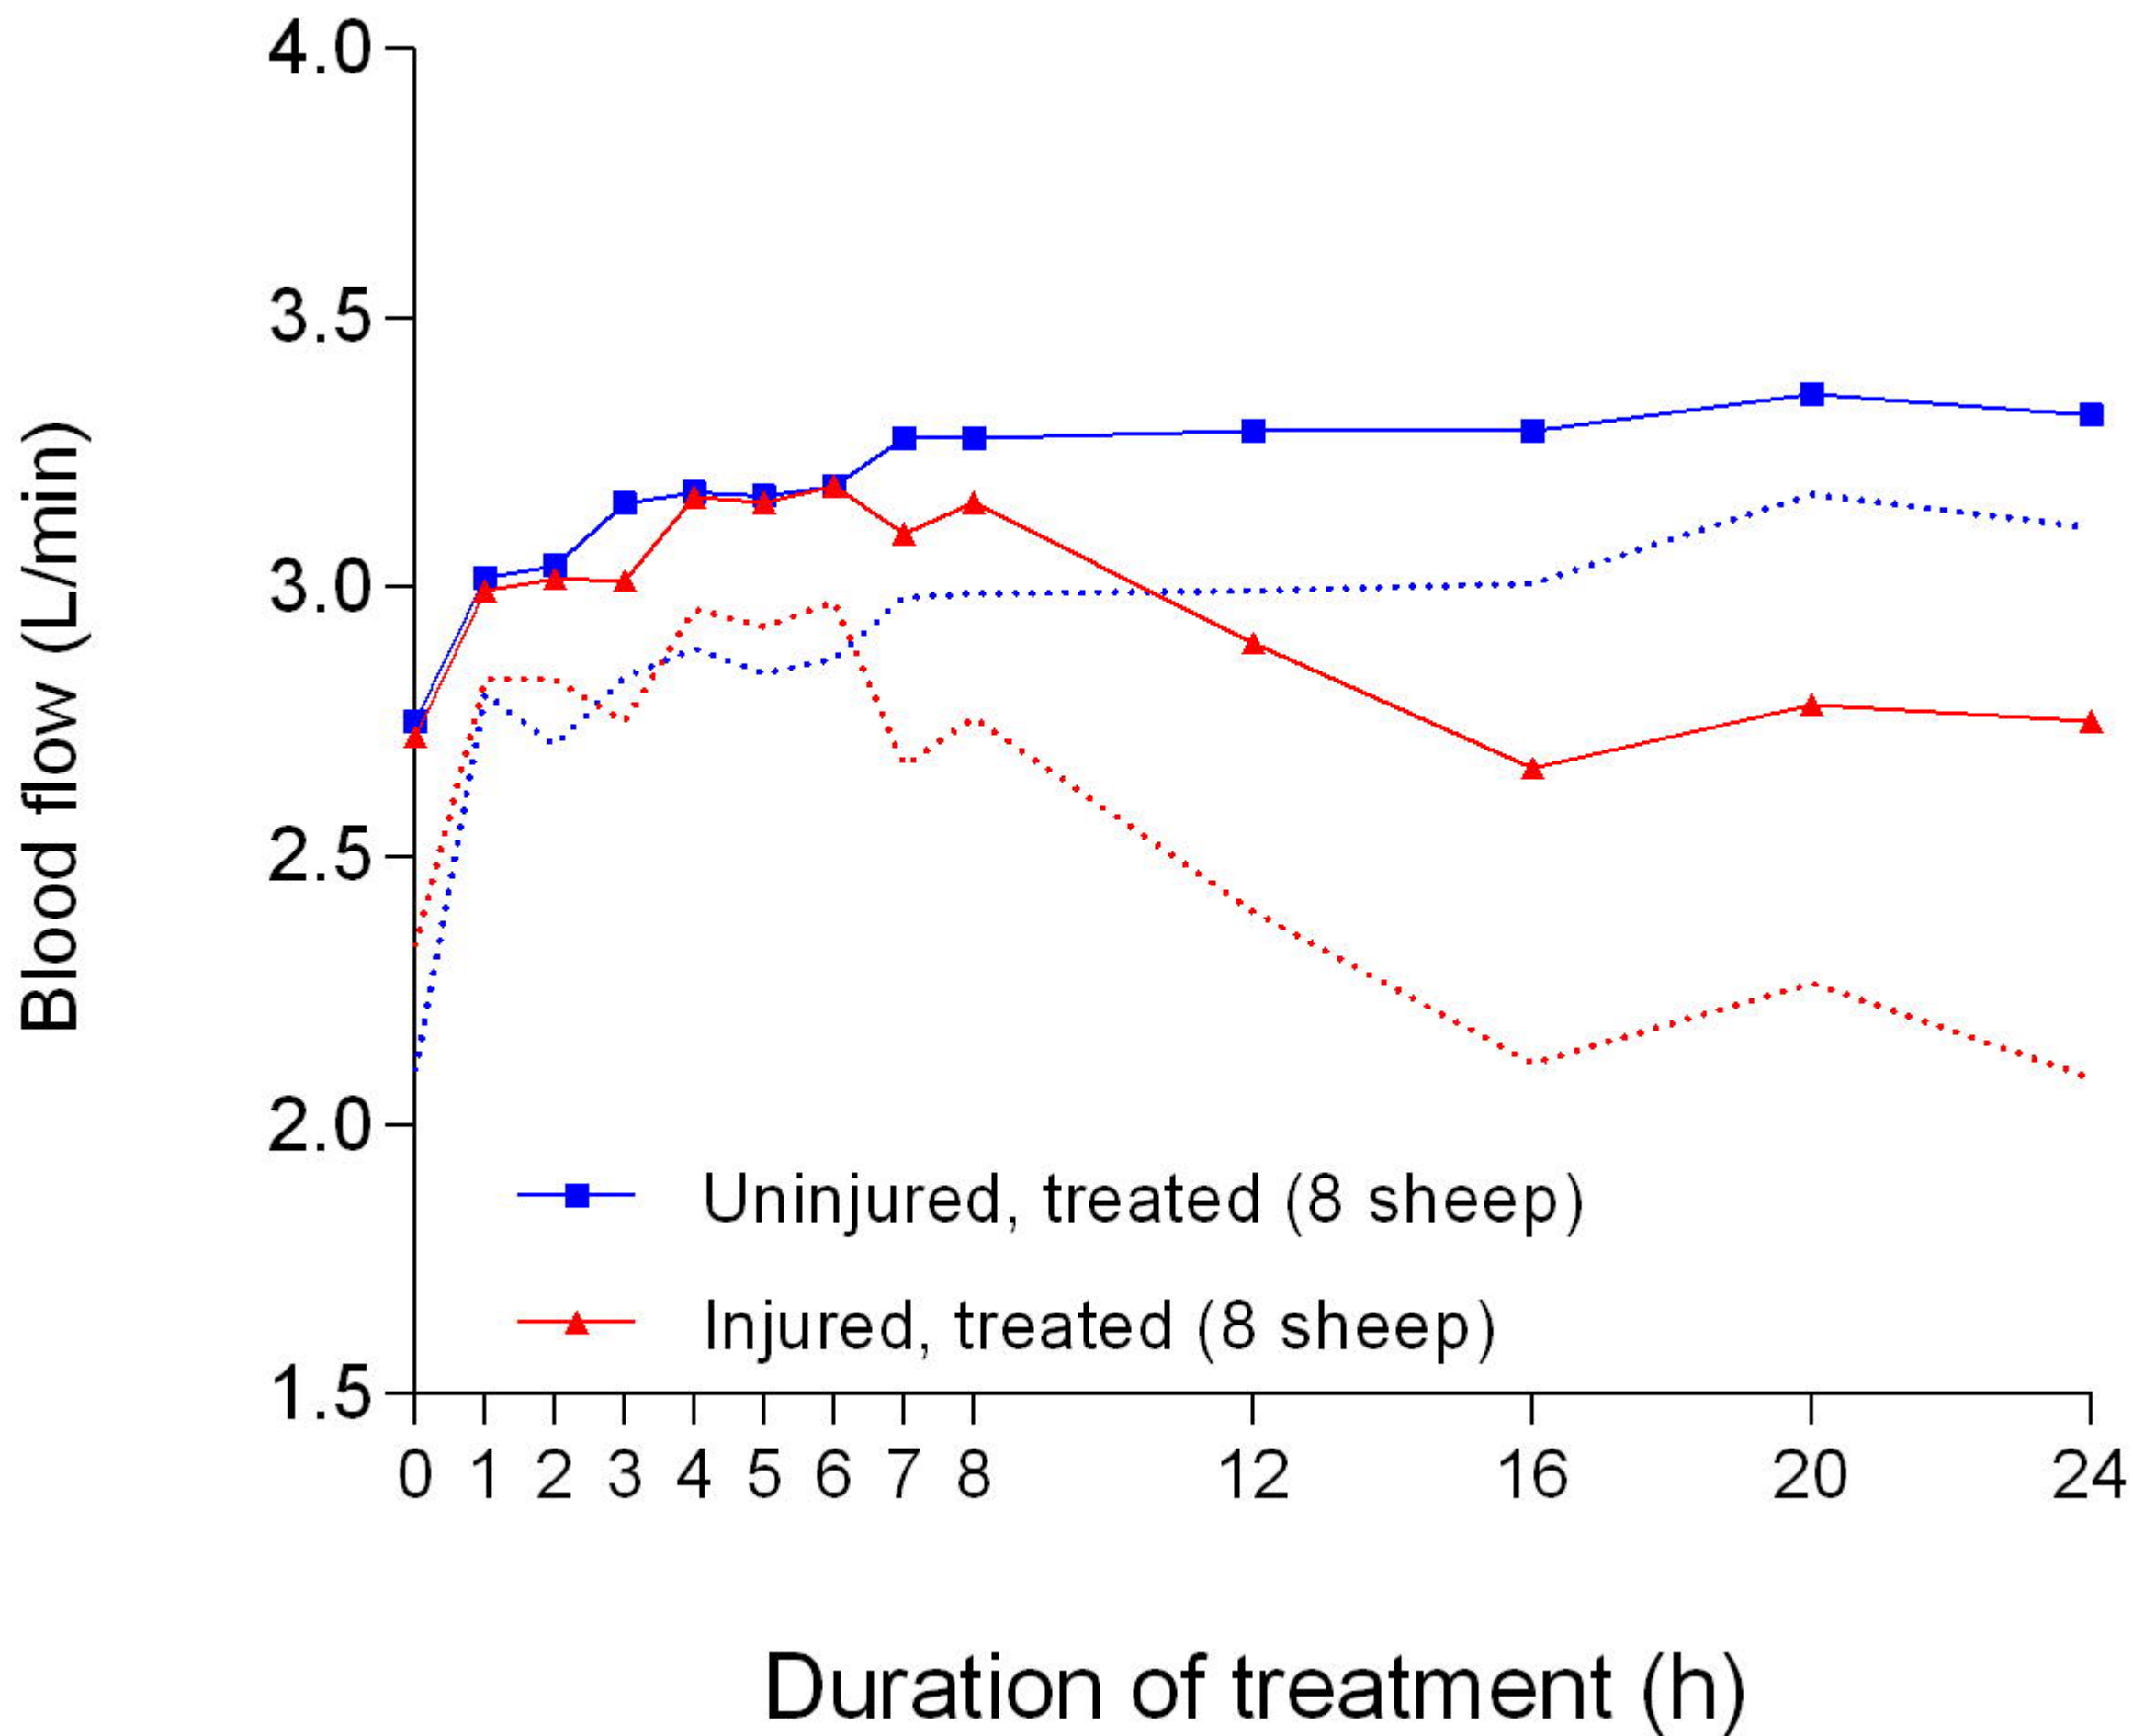



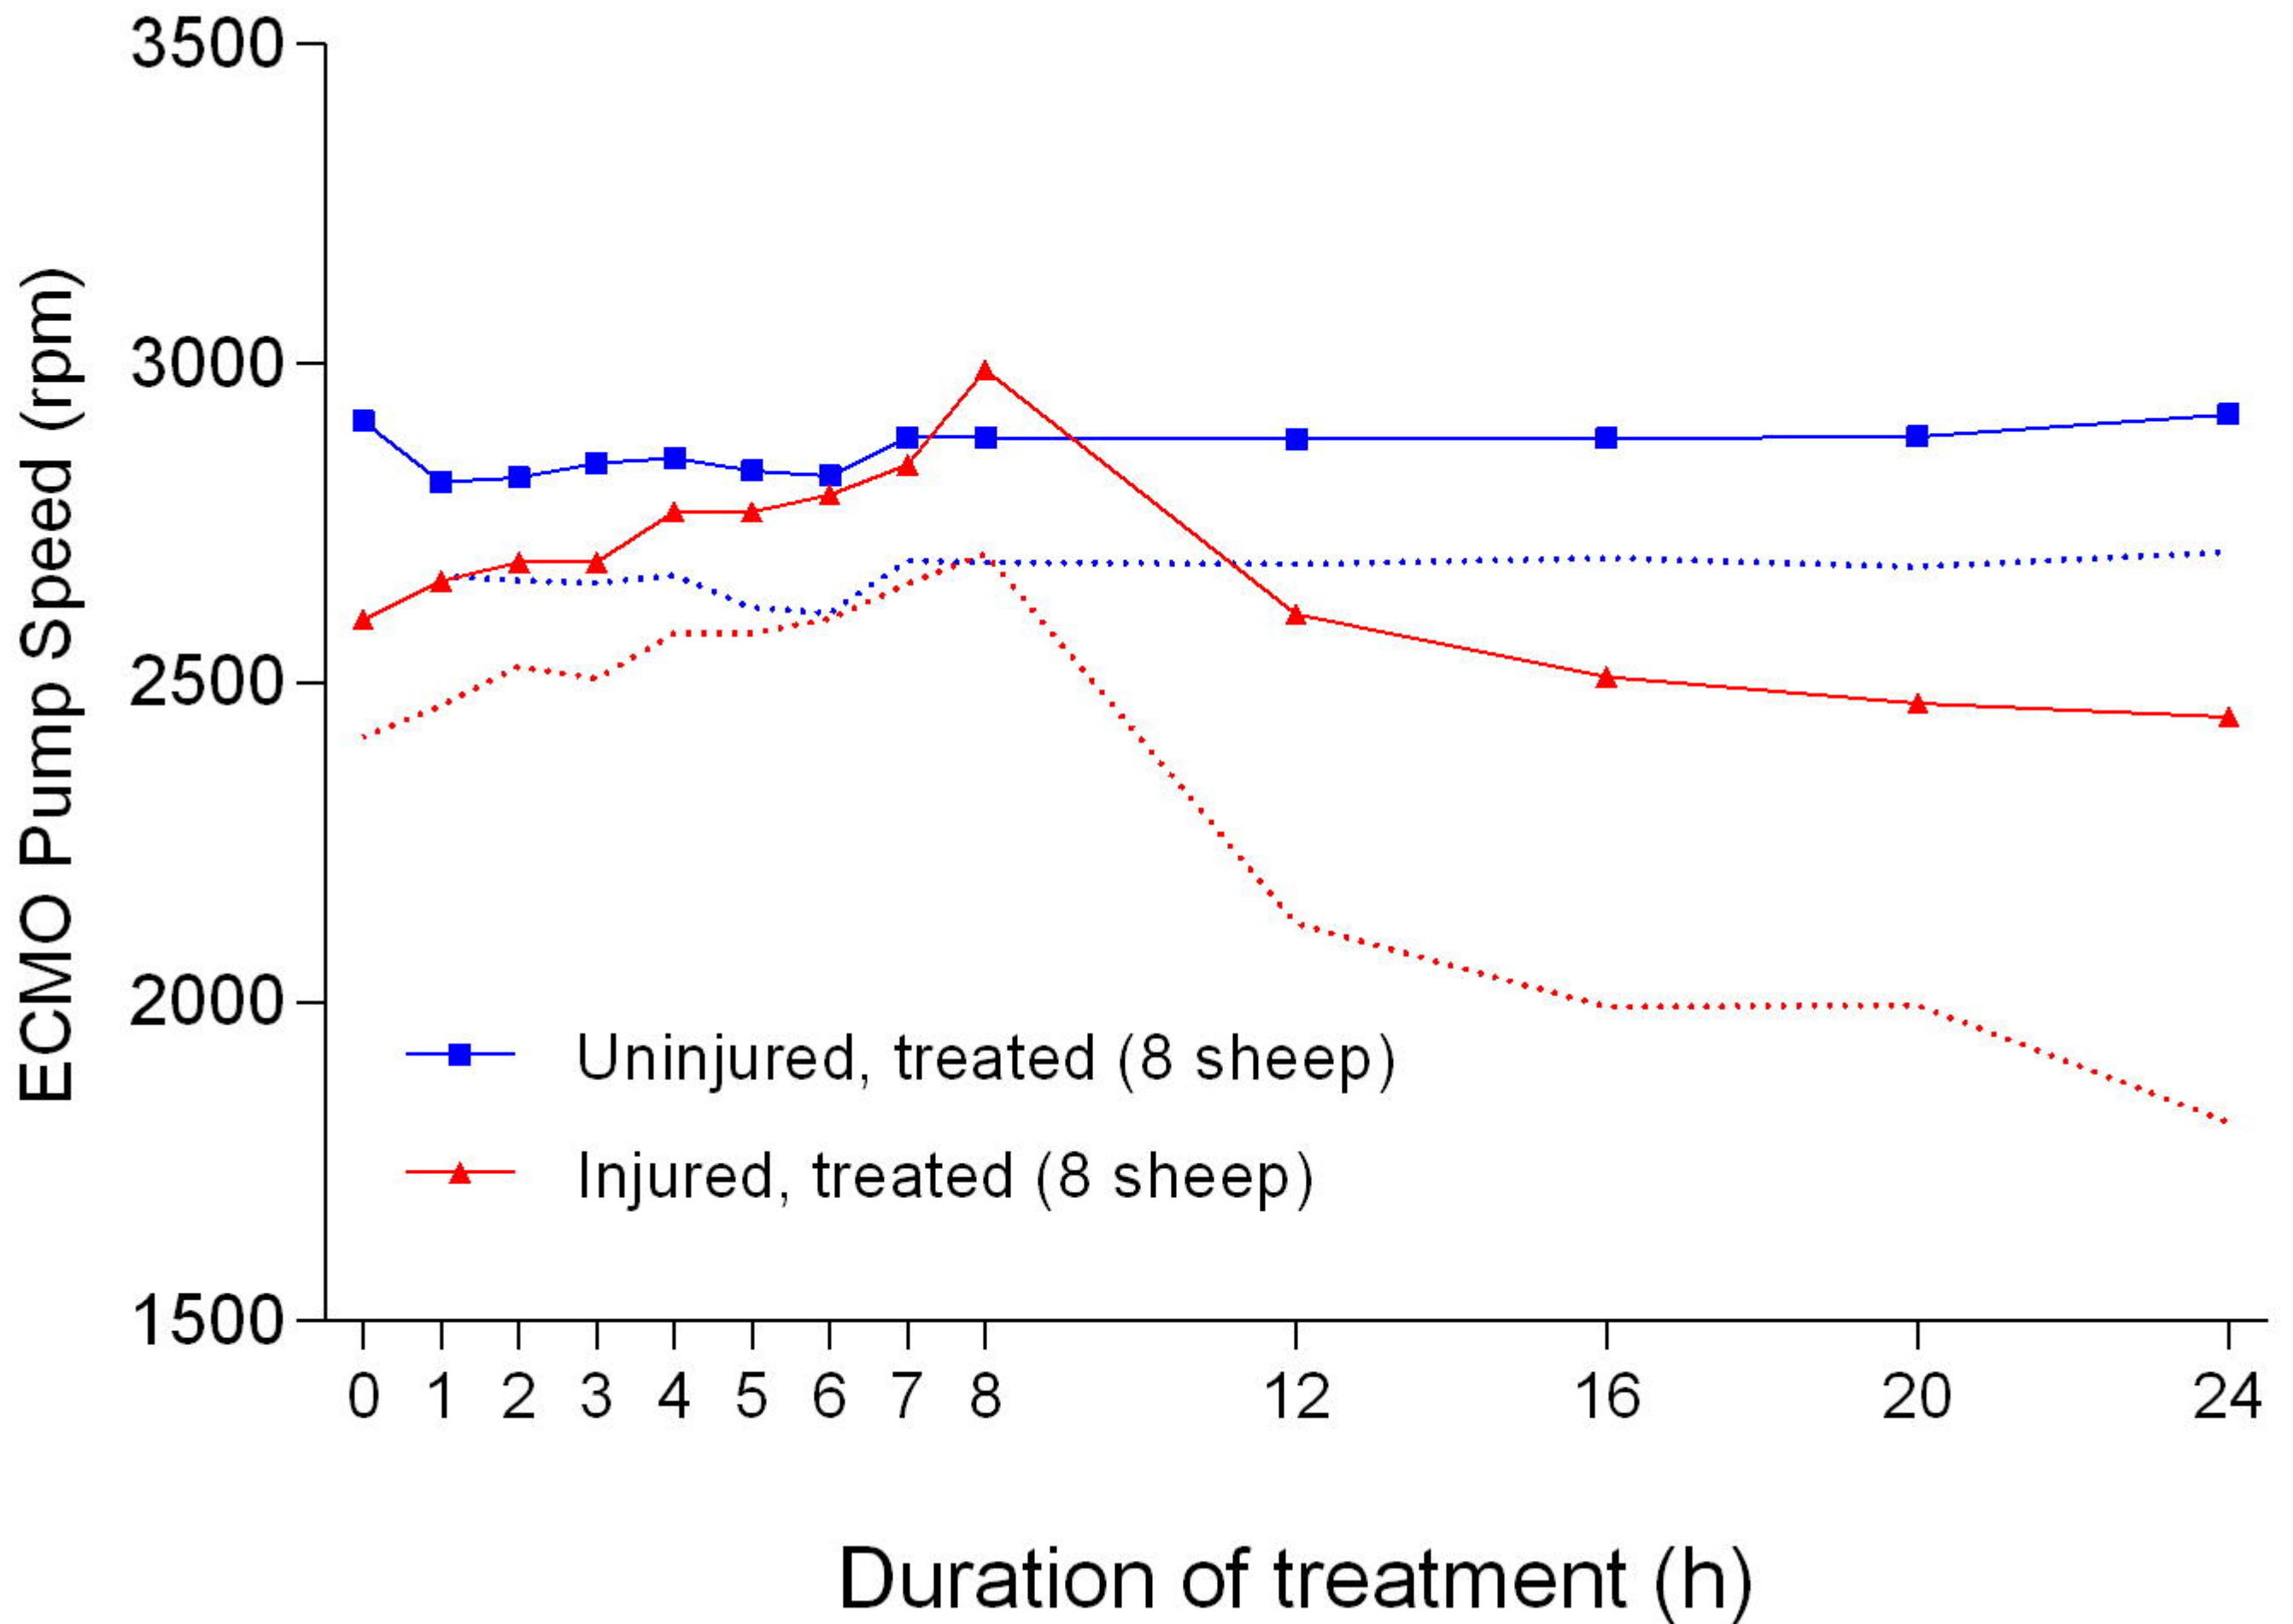

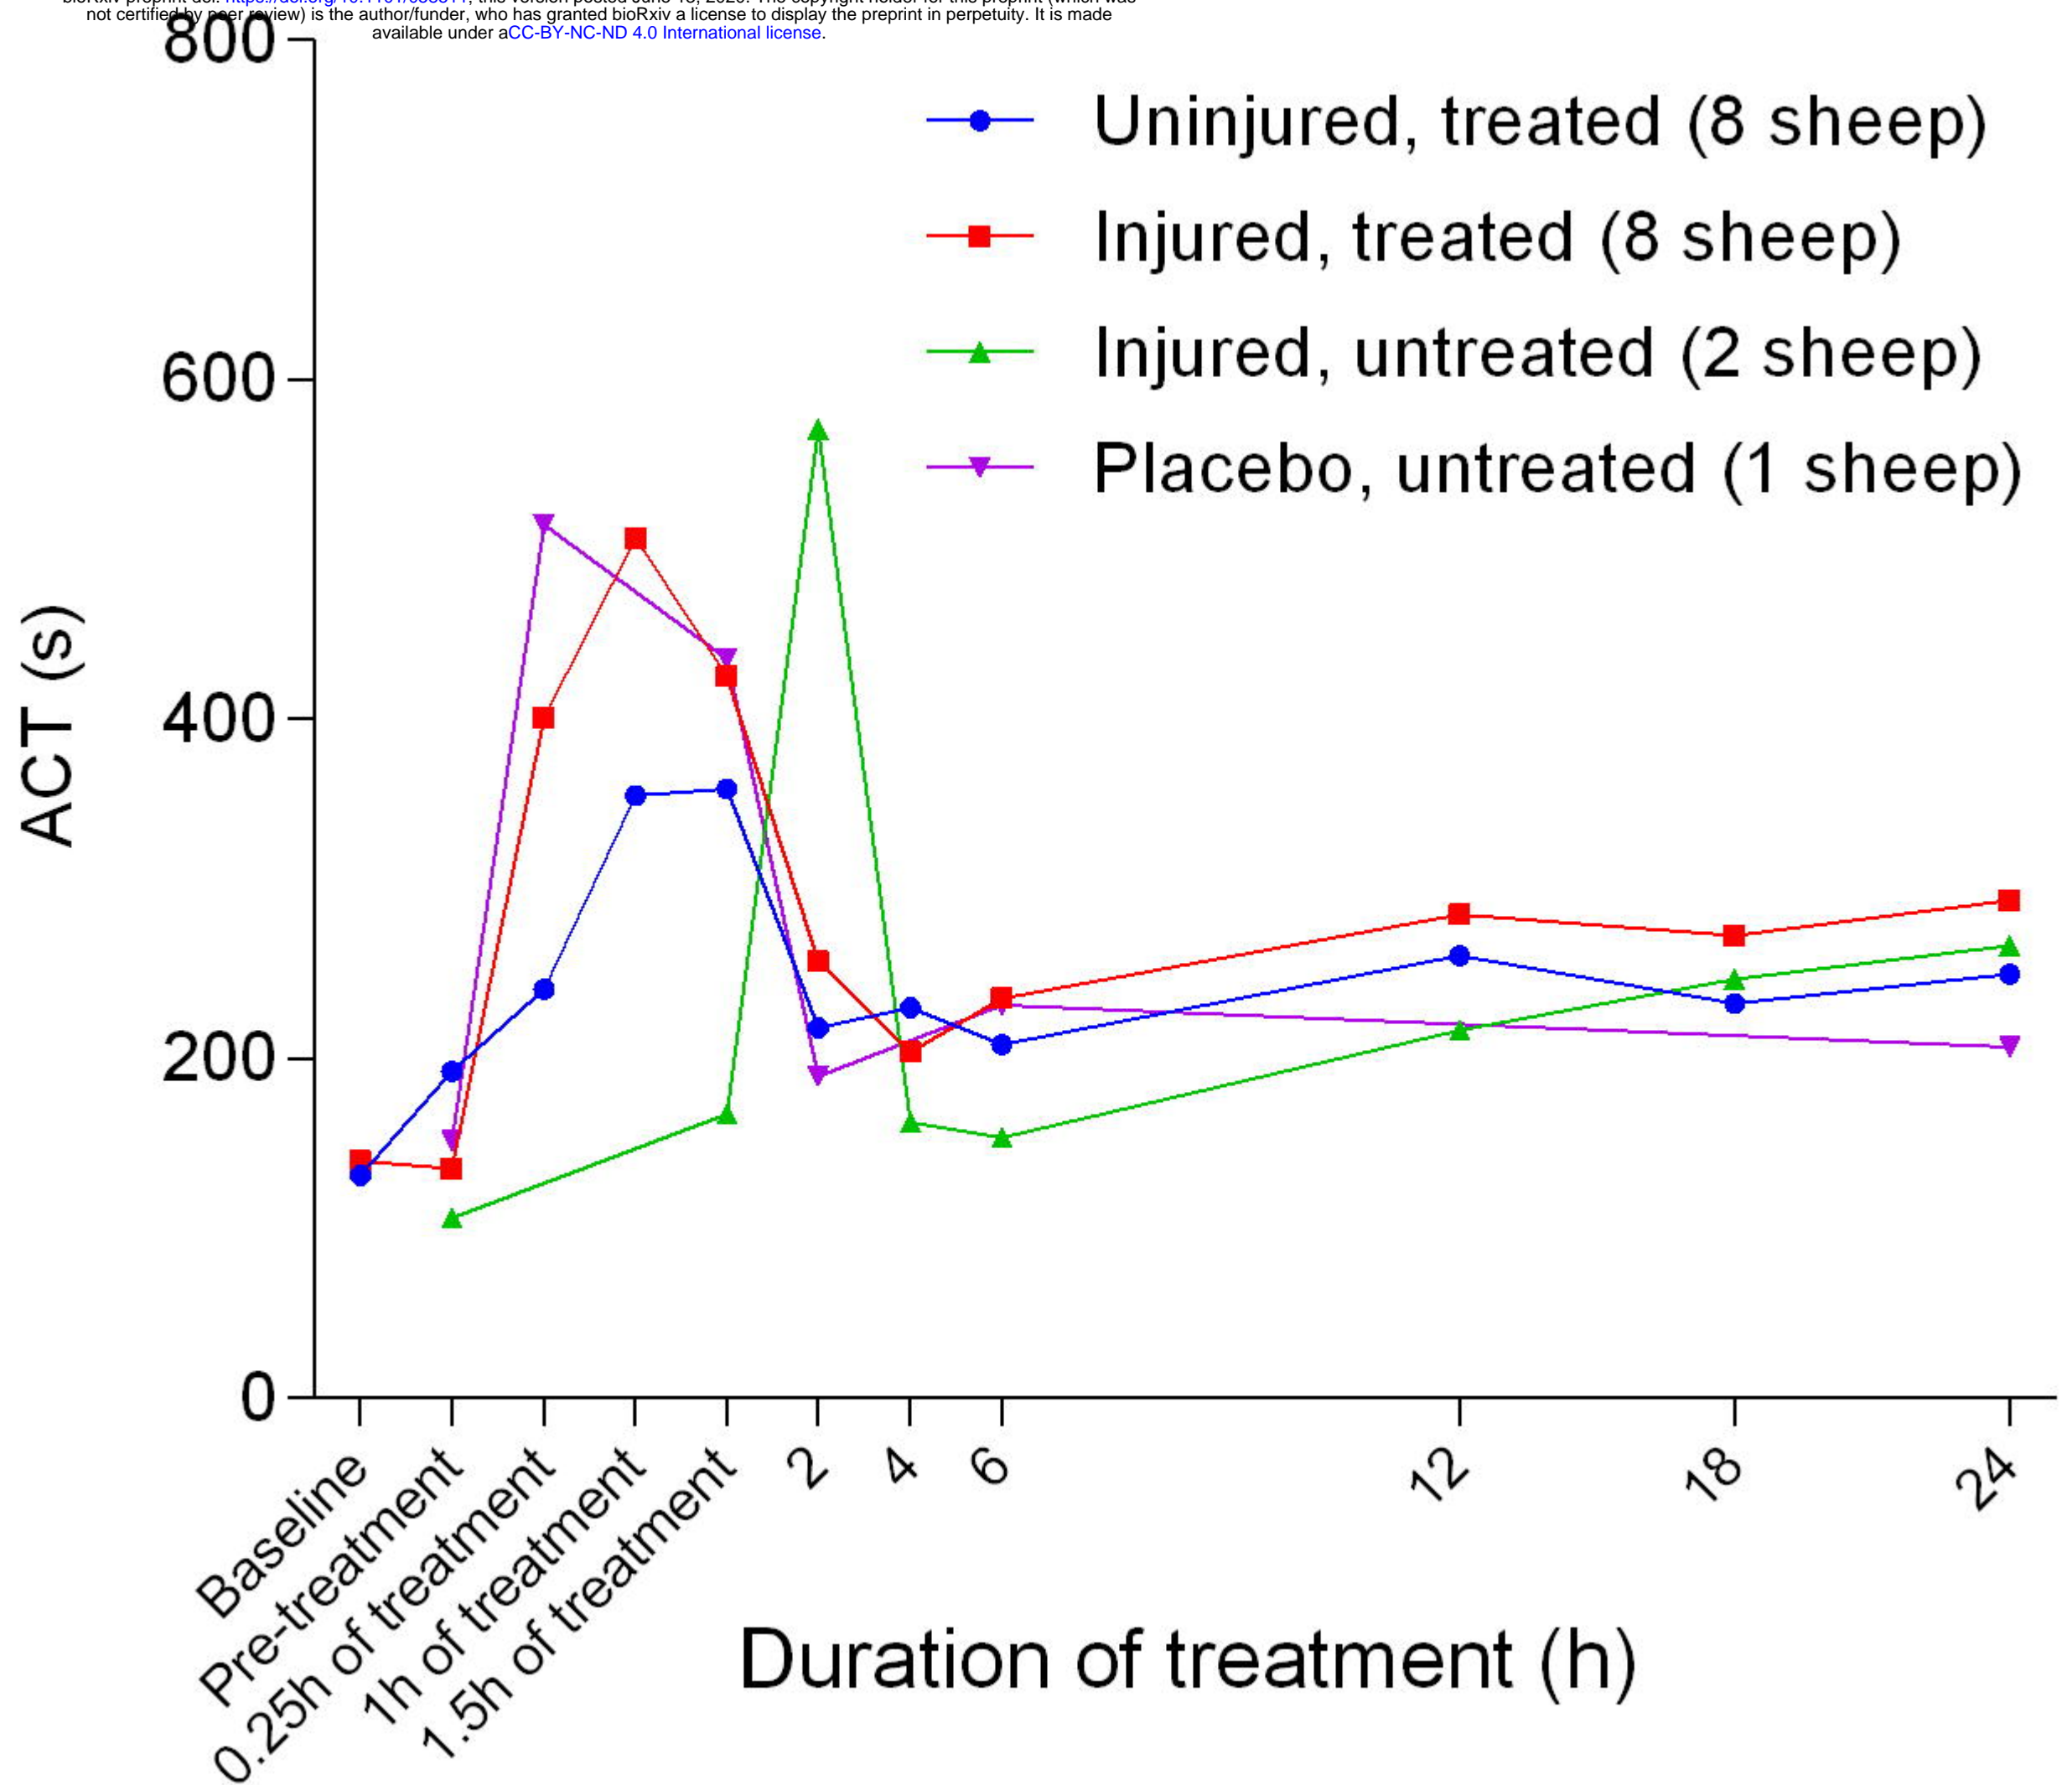

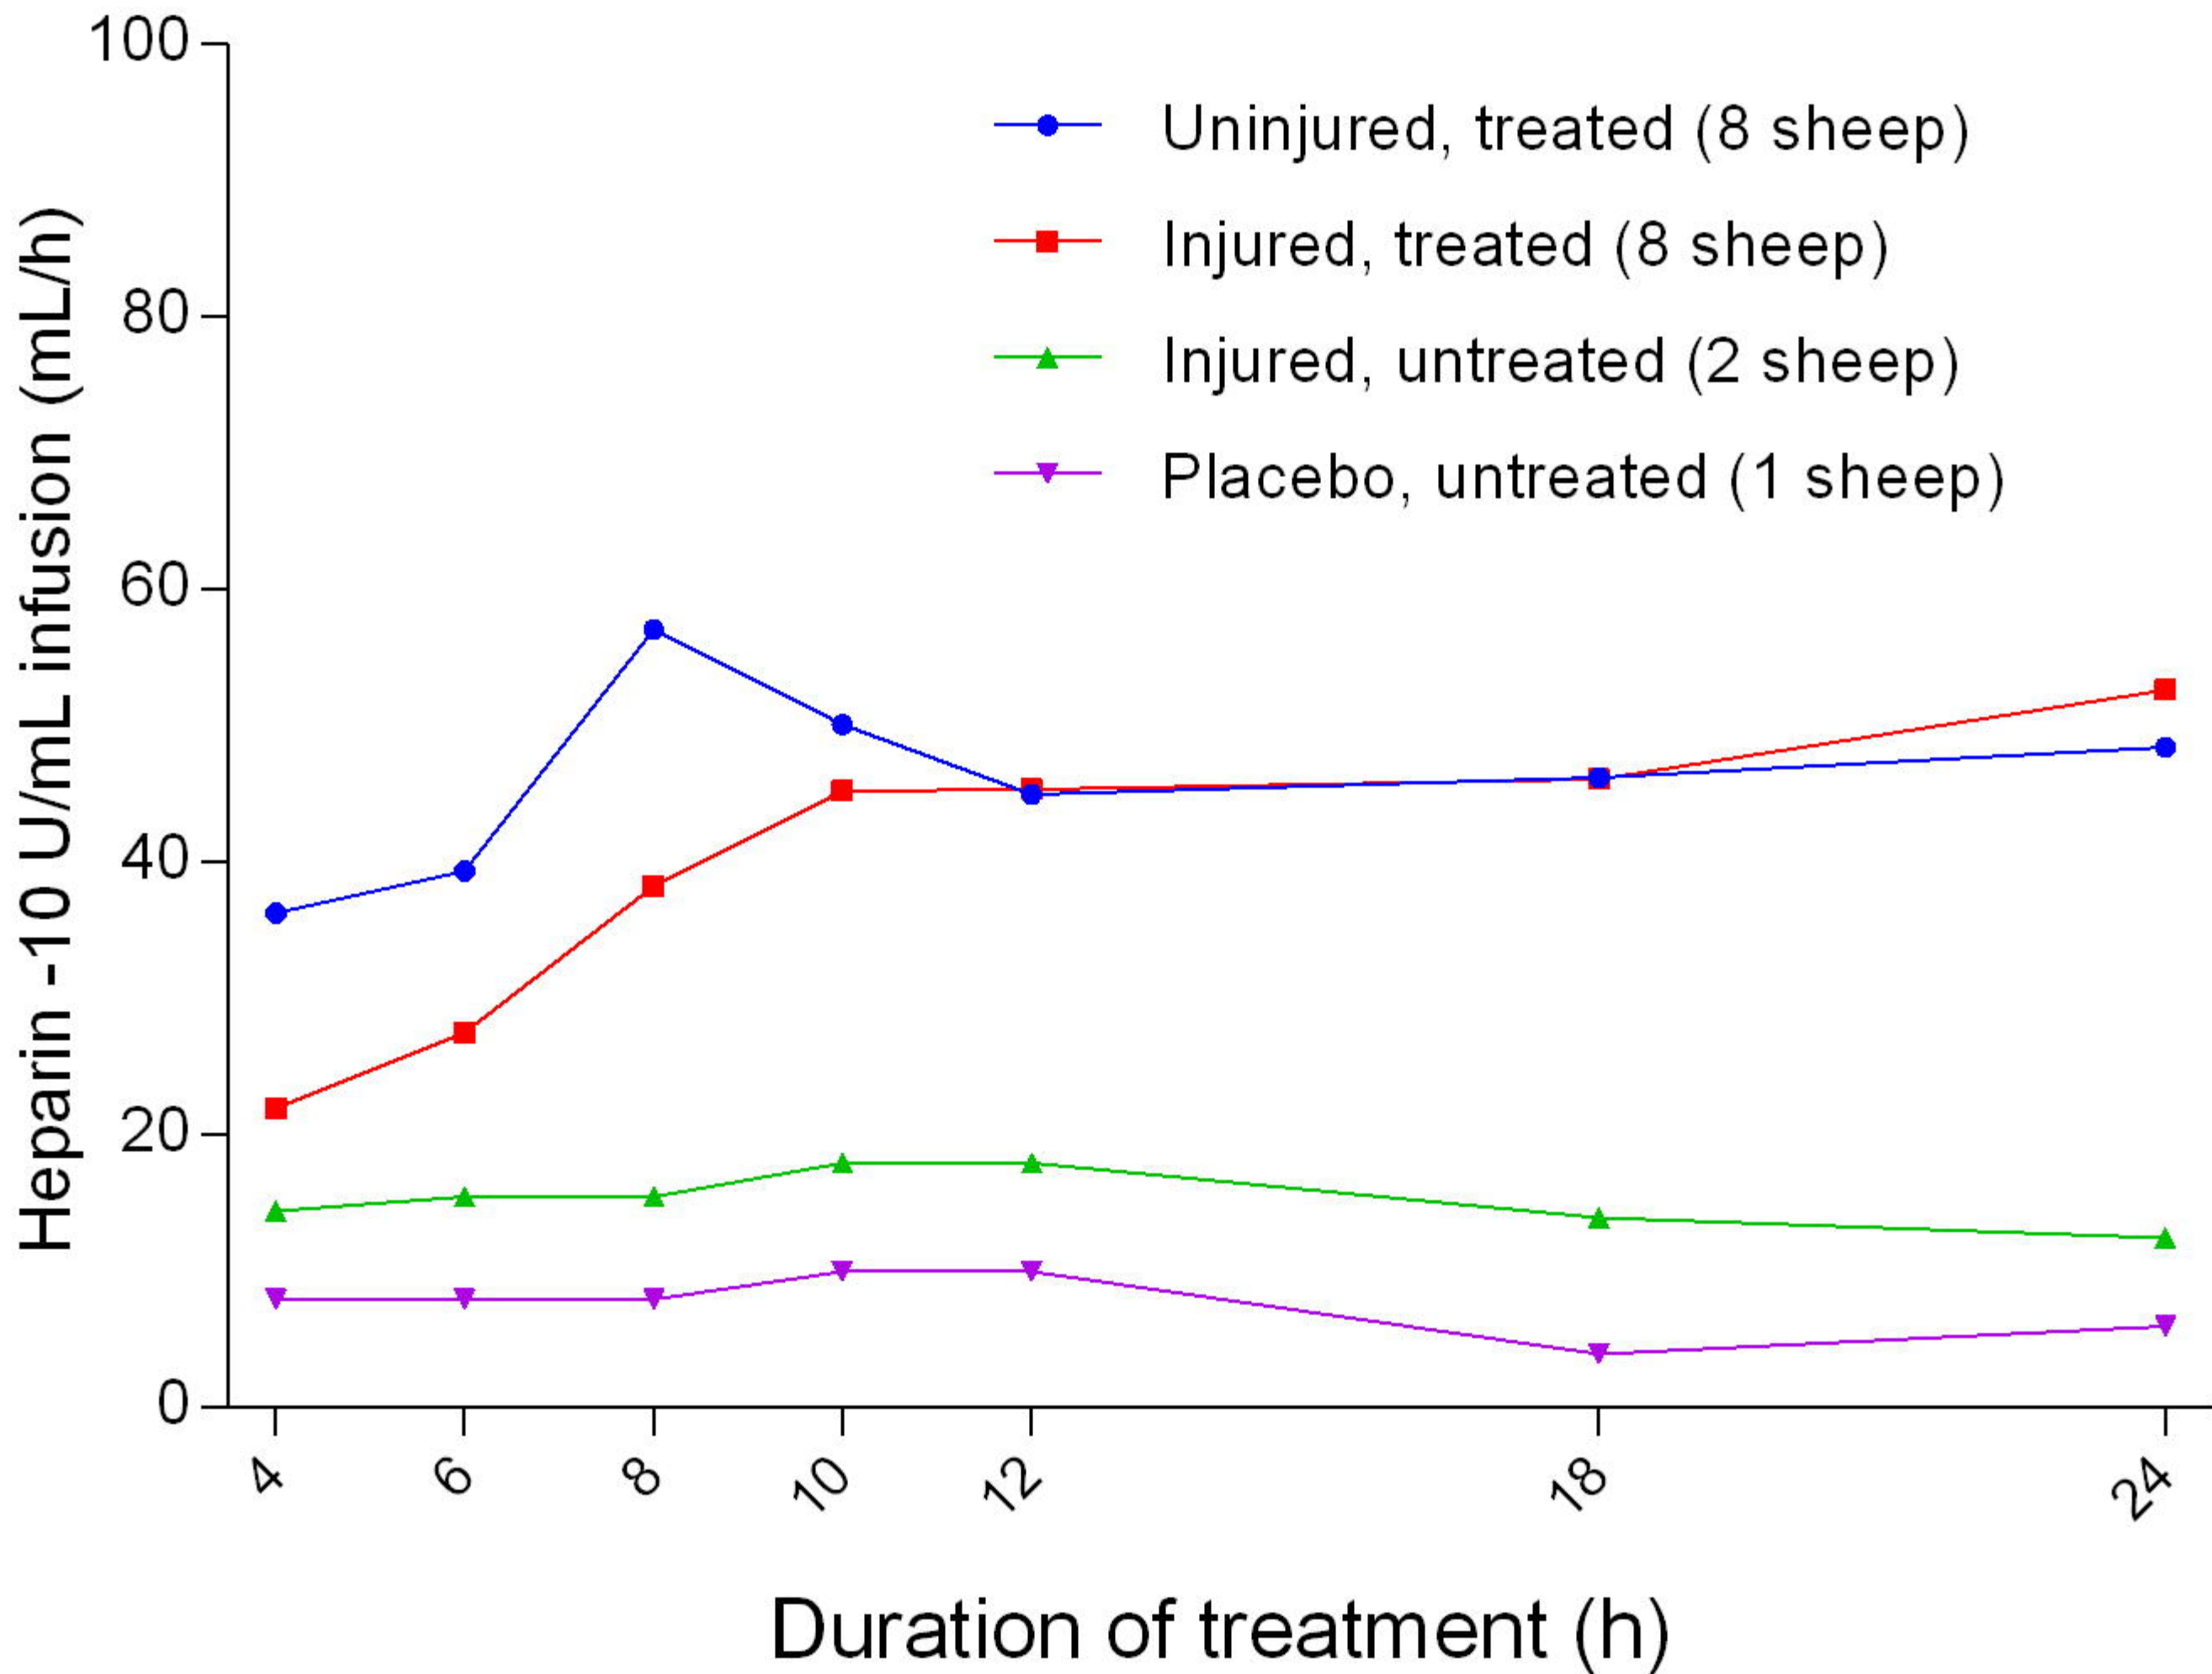





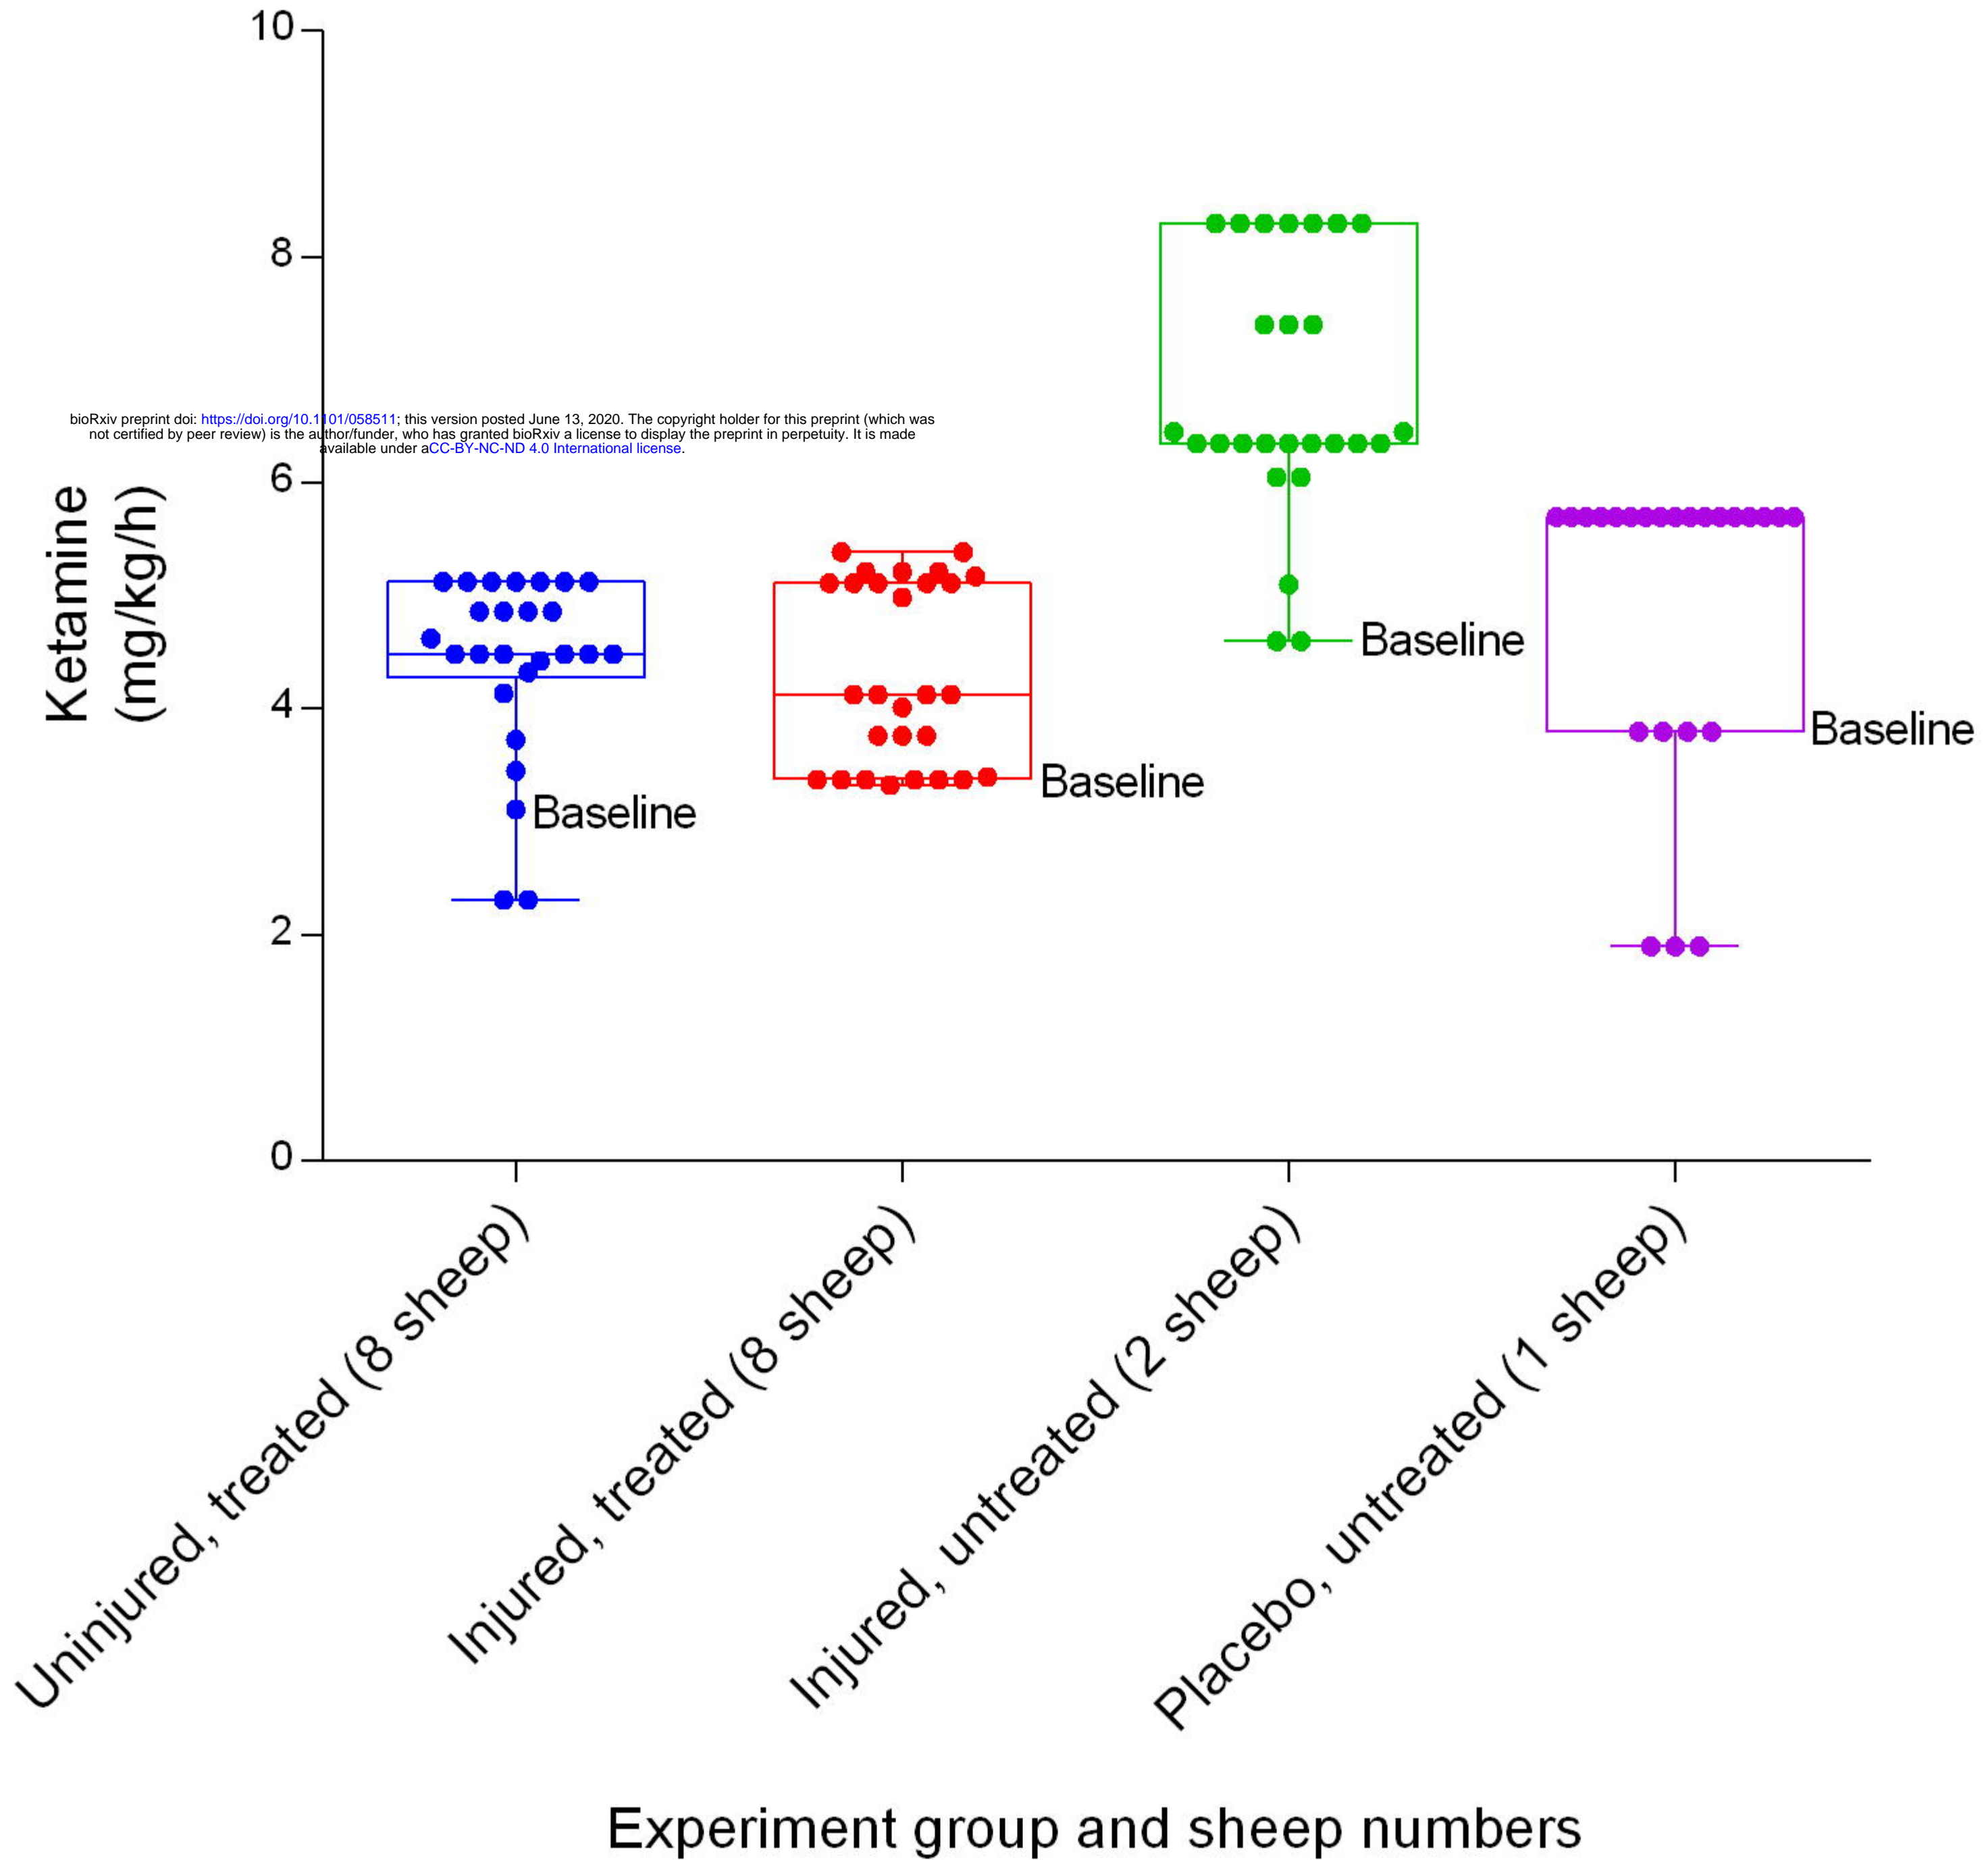

bioRxiv preprint doi: <https://doi.org/10.1101/058511>; this version posted June 13, 2020. The copyright holder for this preprint (which was not certified by peer review) is the author/funder, who has granted bioRxiv a license to display the preprint in perpetuity. It is made available under aCC-BY-NC-ND 4.0 International license.

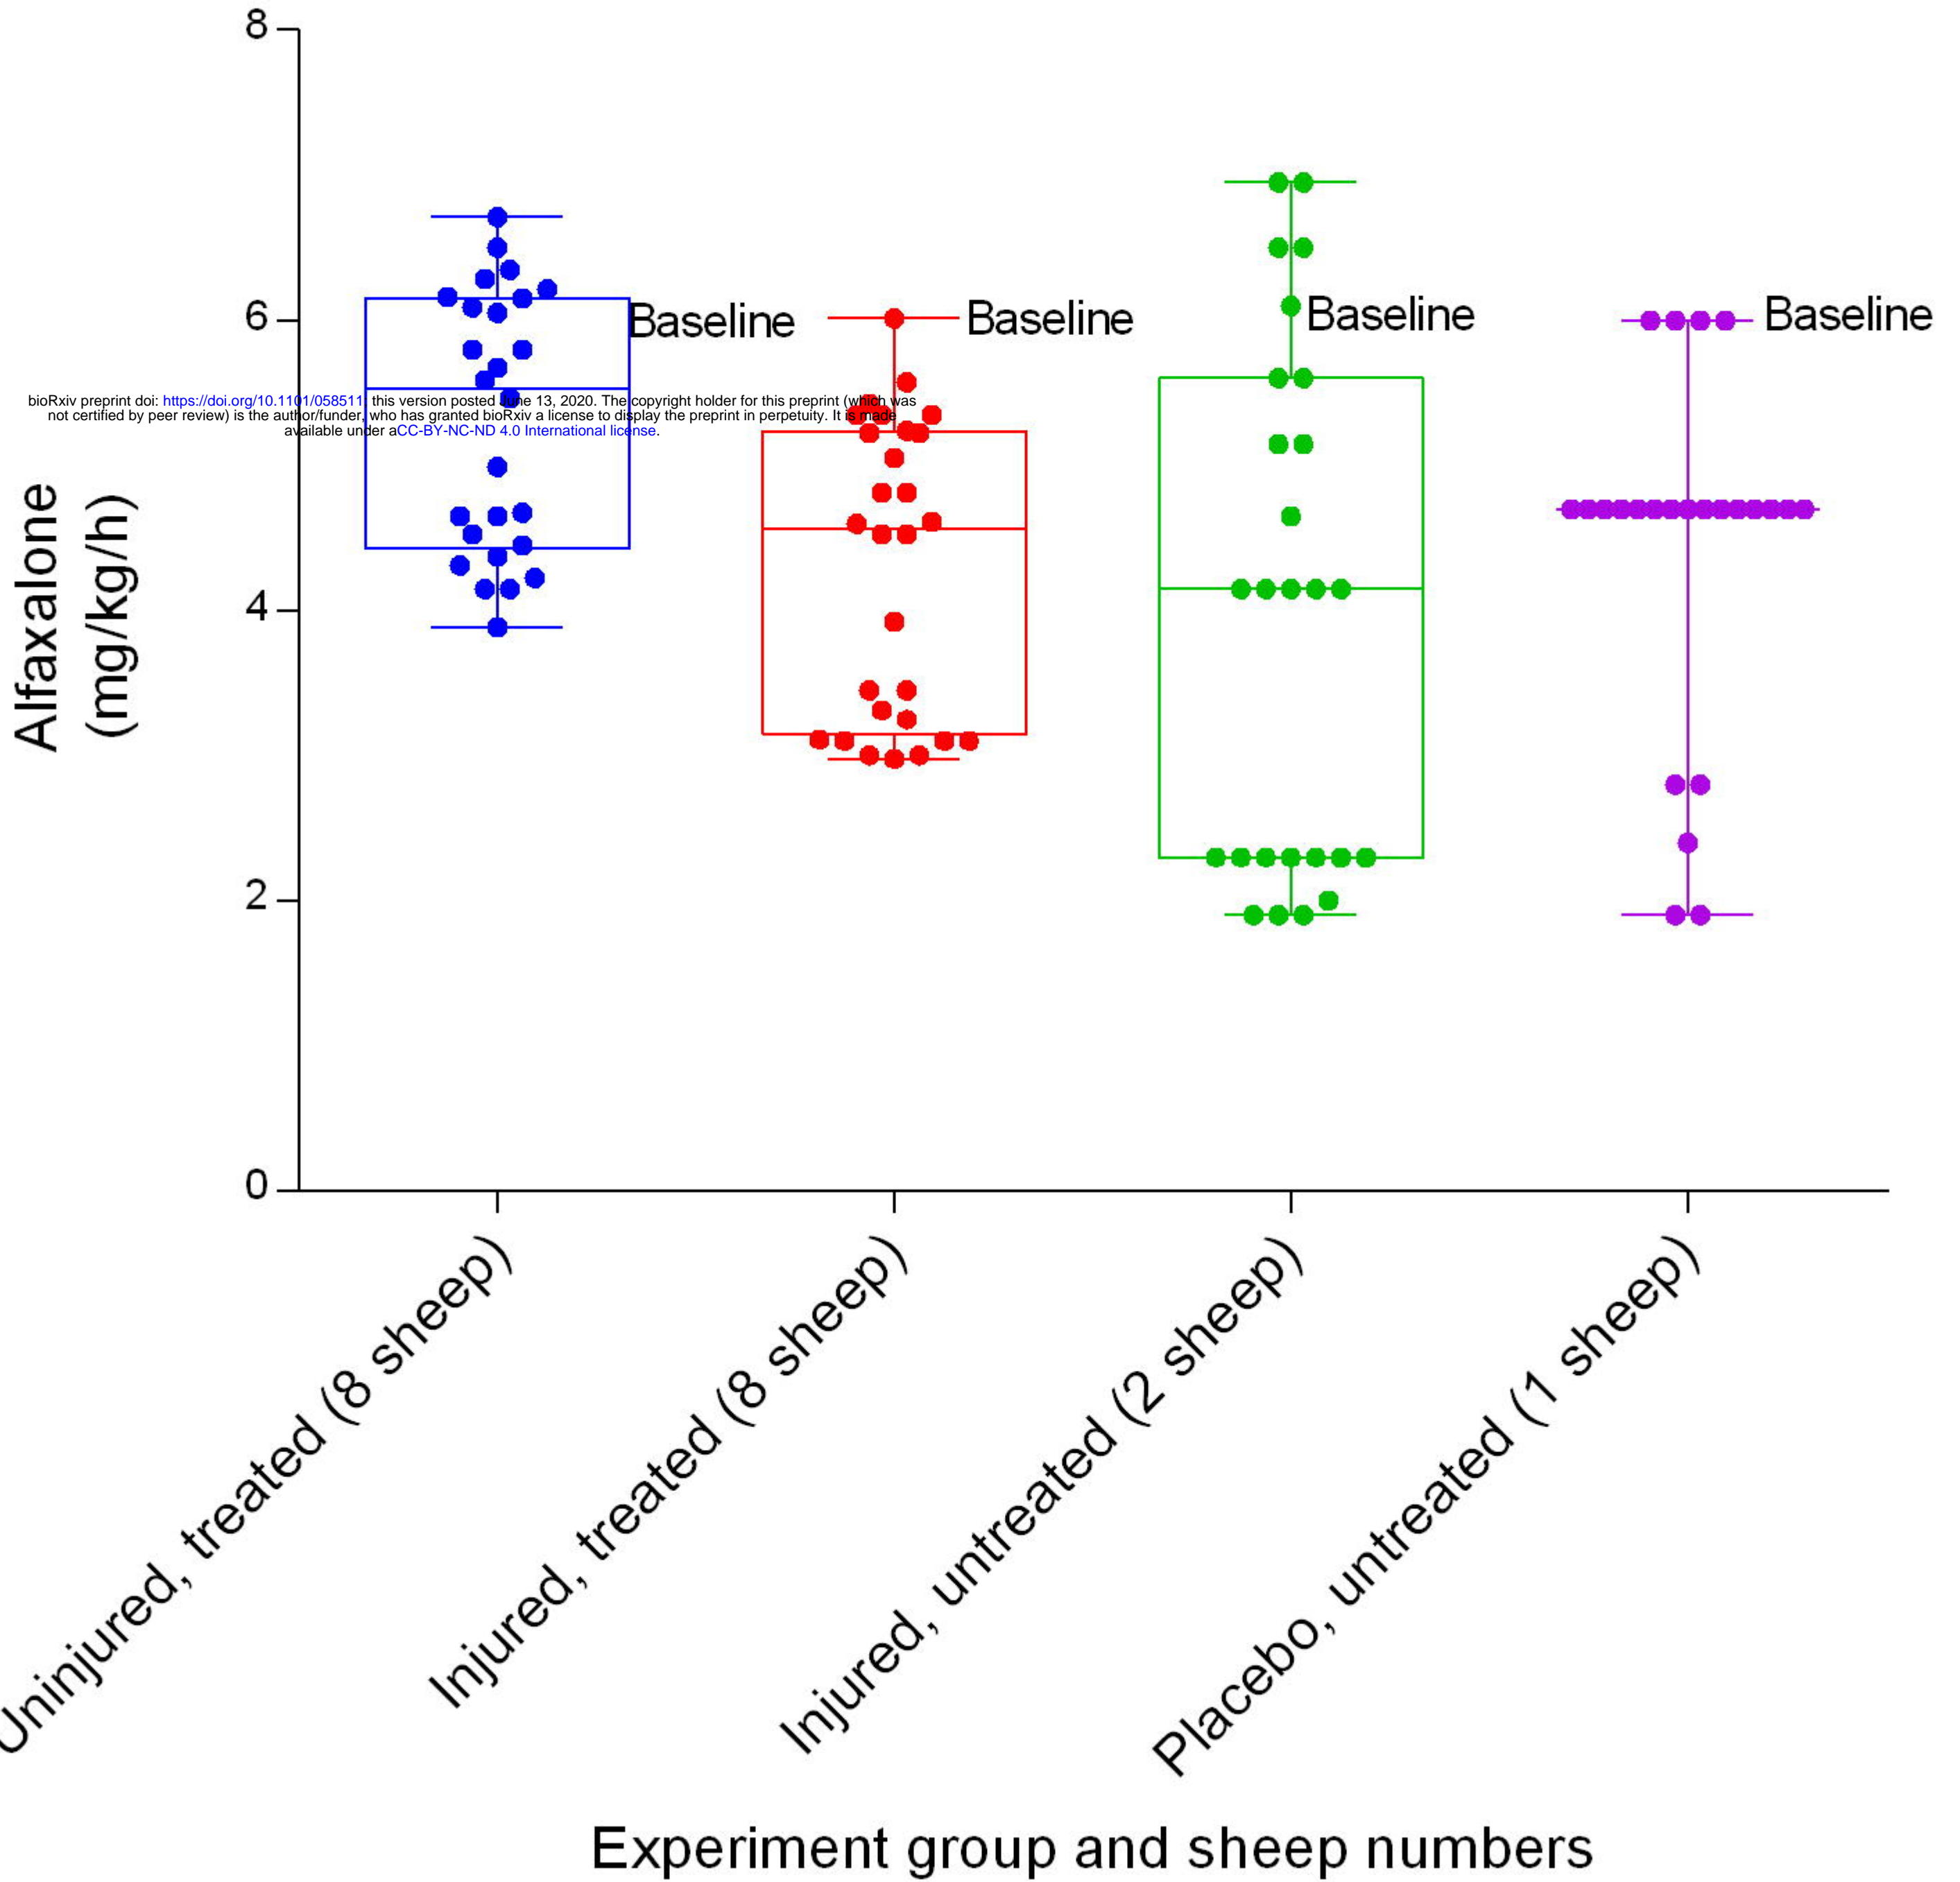

bioRxiv preprint doi: <https://doi.org/10.1101/058511>; this version posted June 13, 2020. The copyright holder for this preprint (which was not certified by peer review) is the author/funder, who has granted bioRxiv a license to display the preprint in perpetuity. It is made available under aCC-BY-NC-ND 4.0 International license.

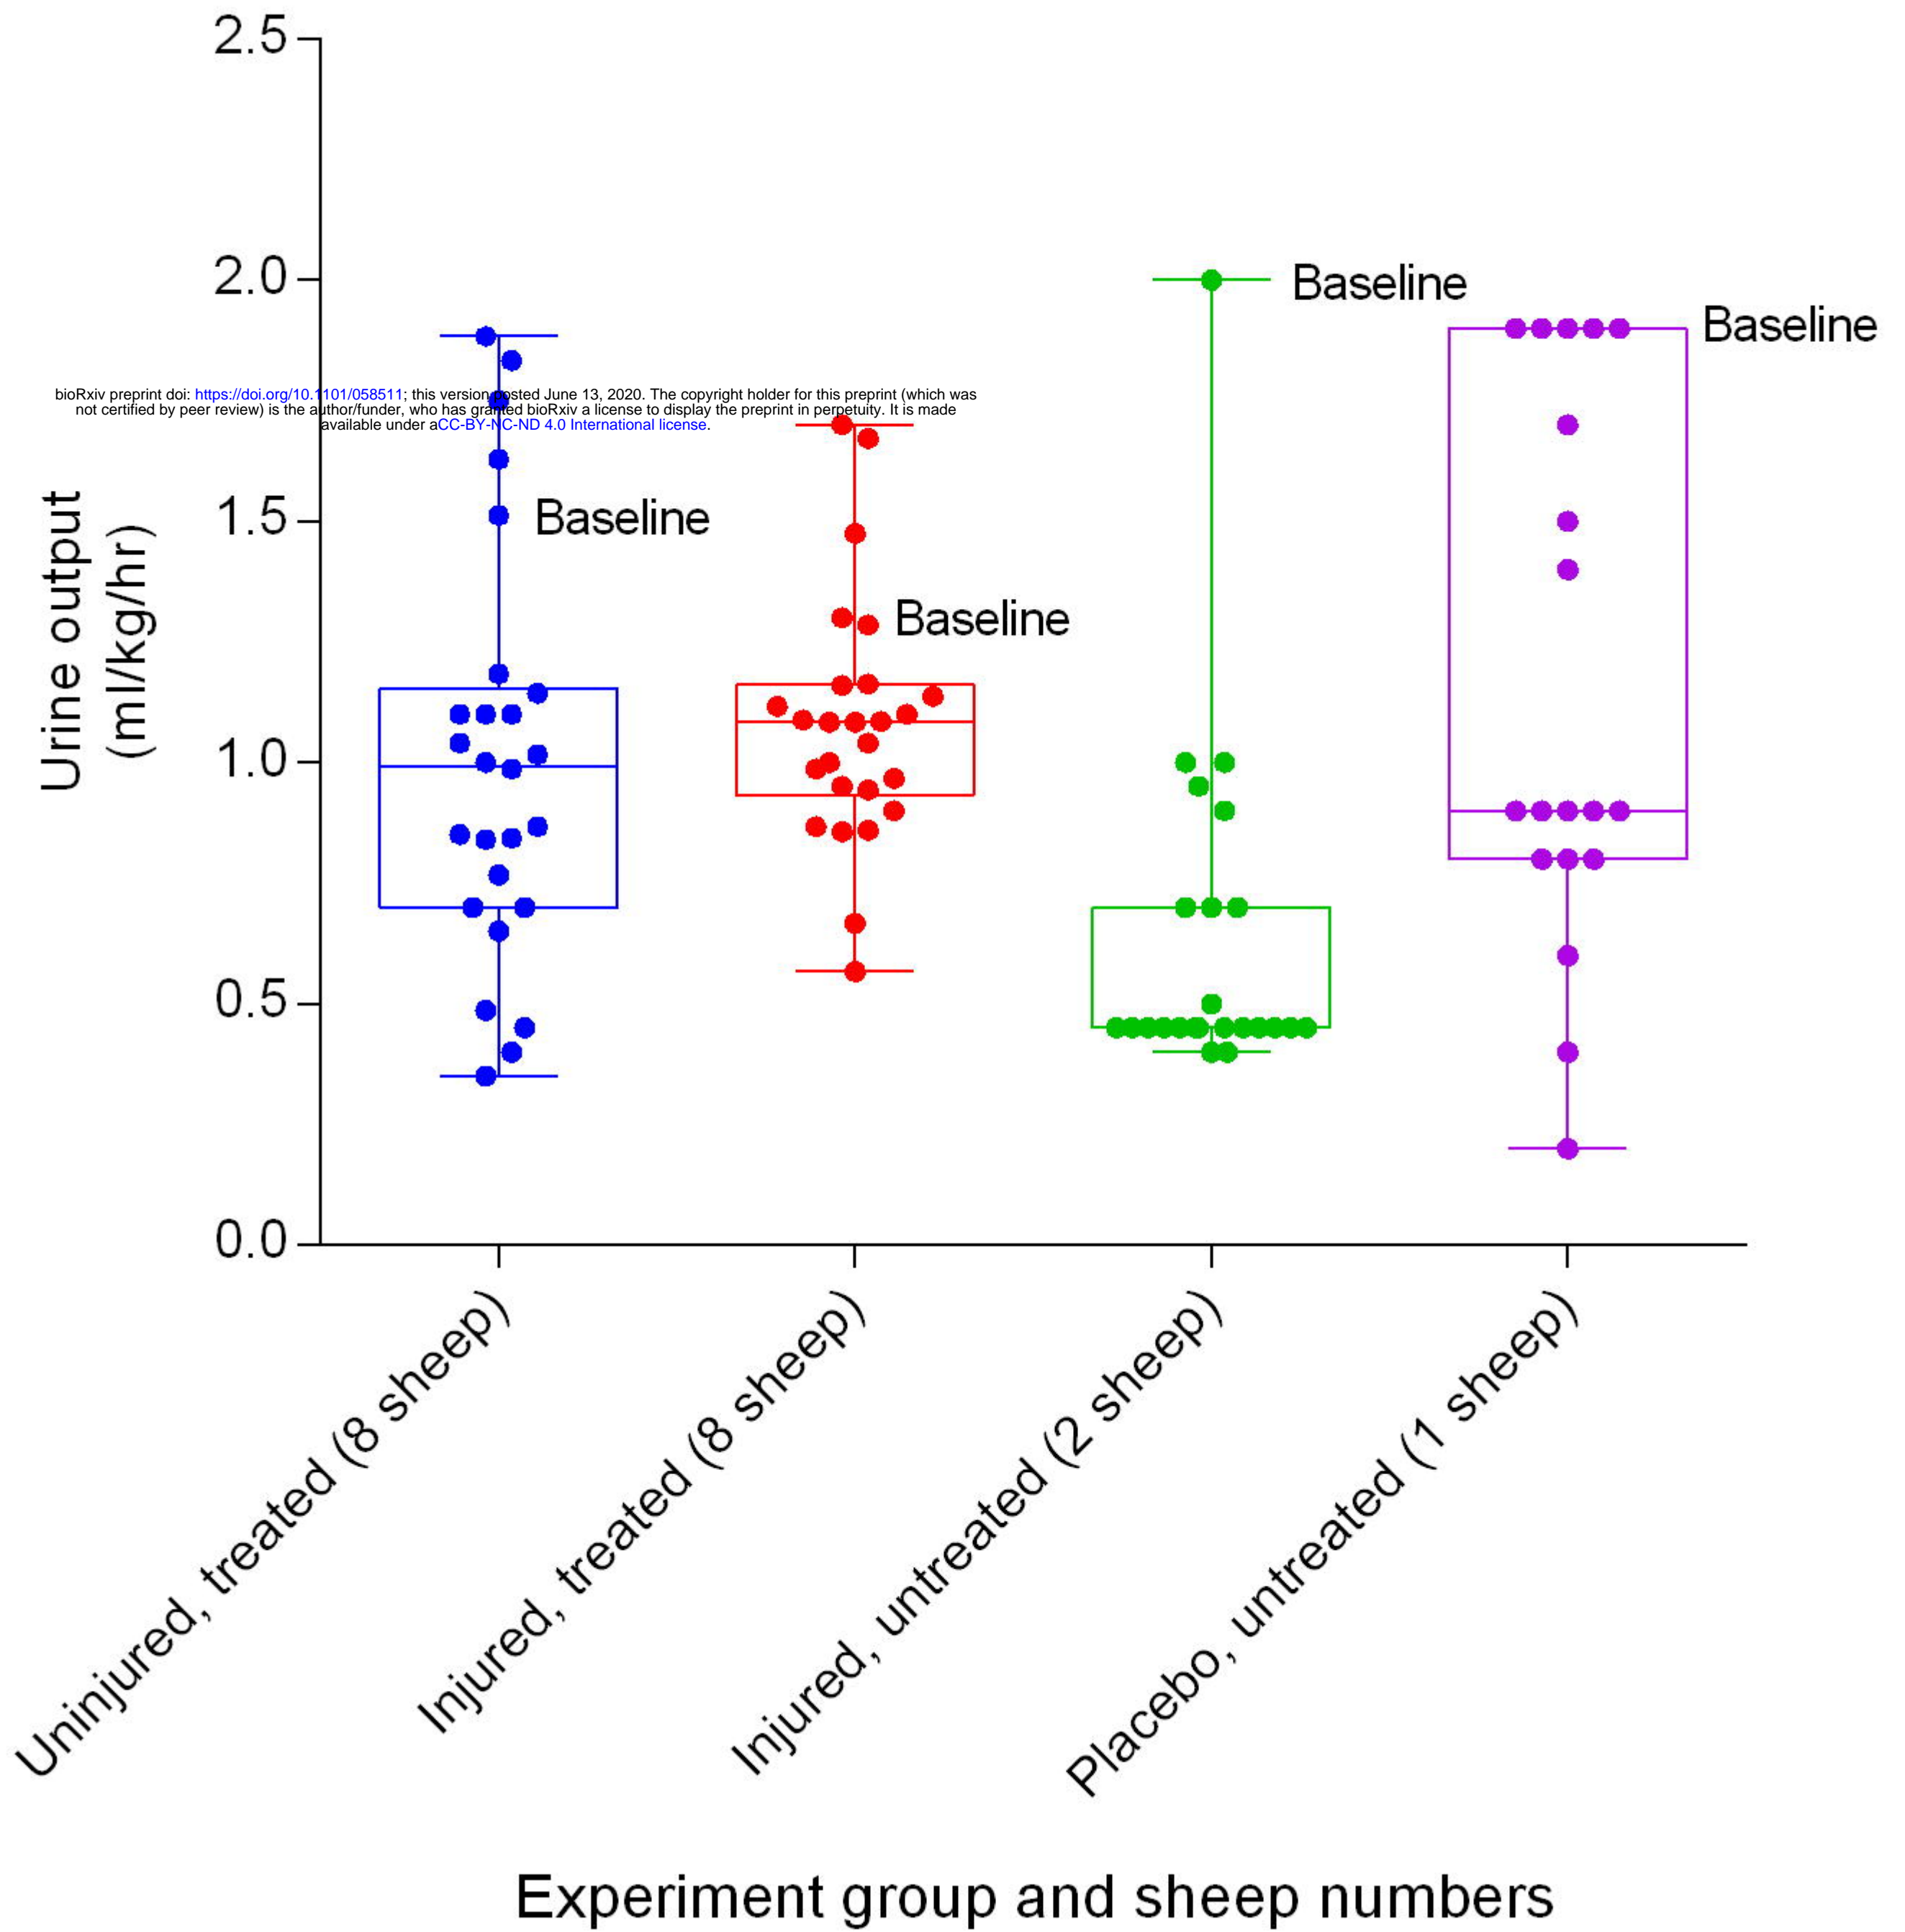



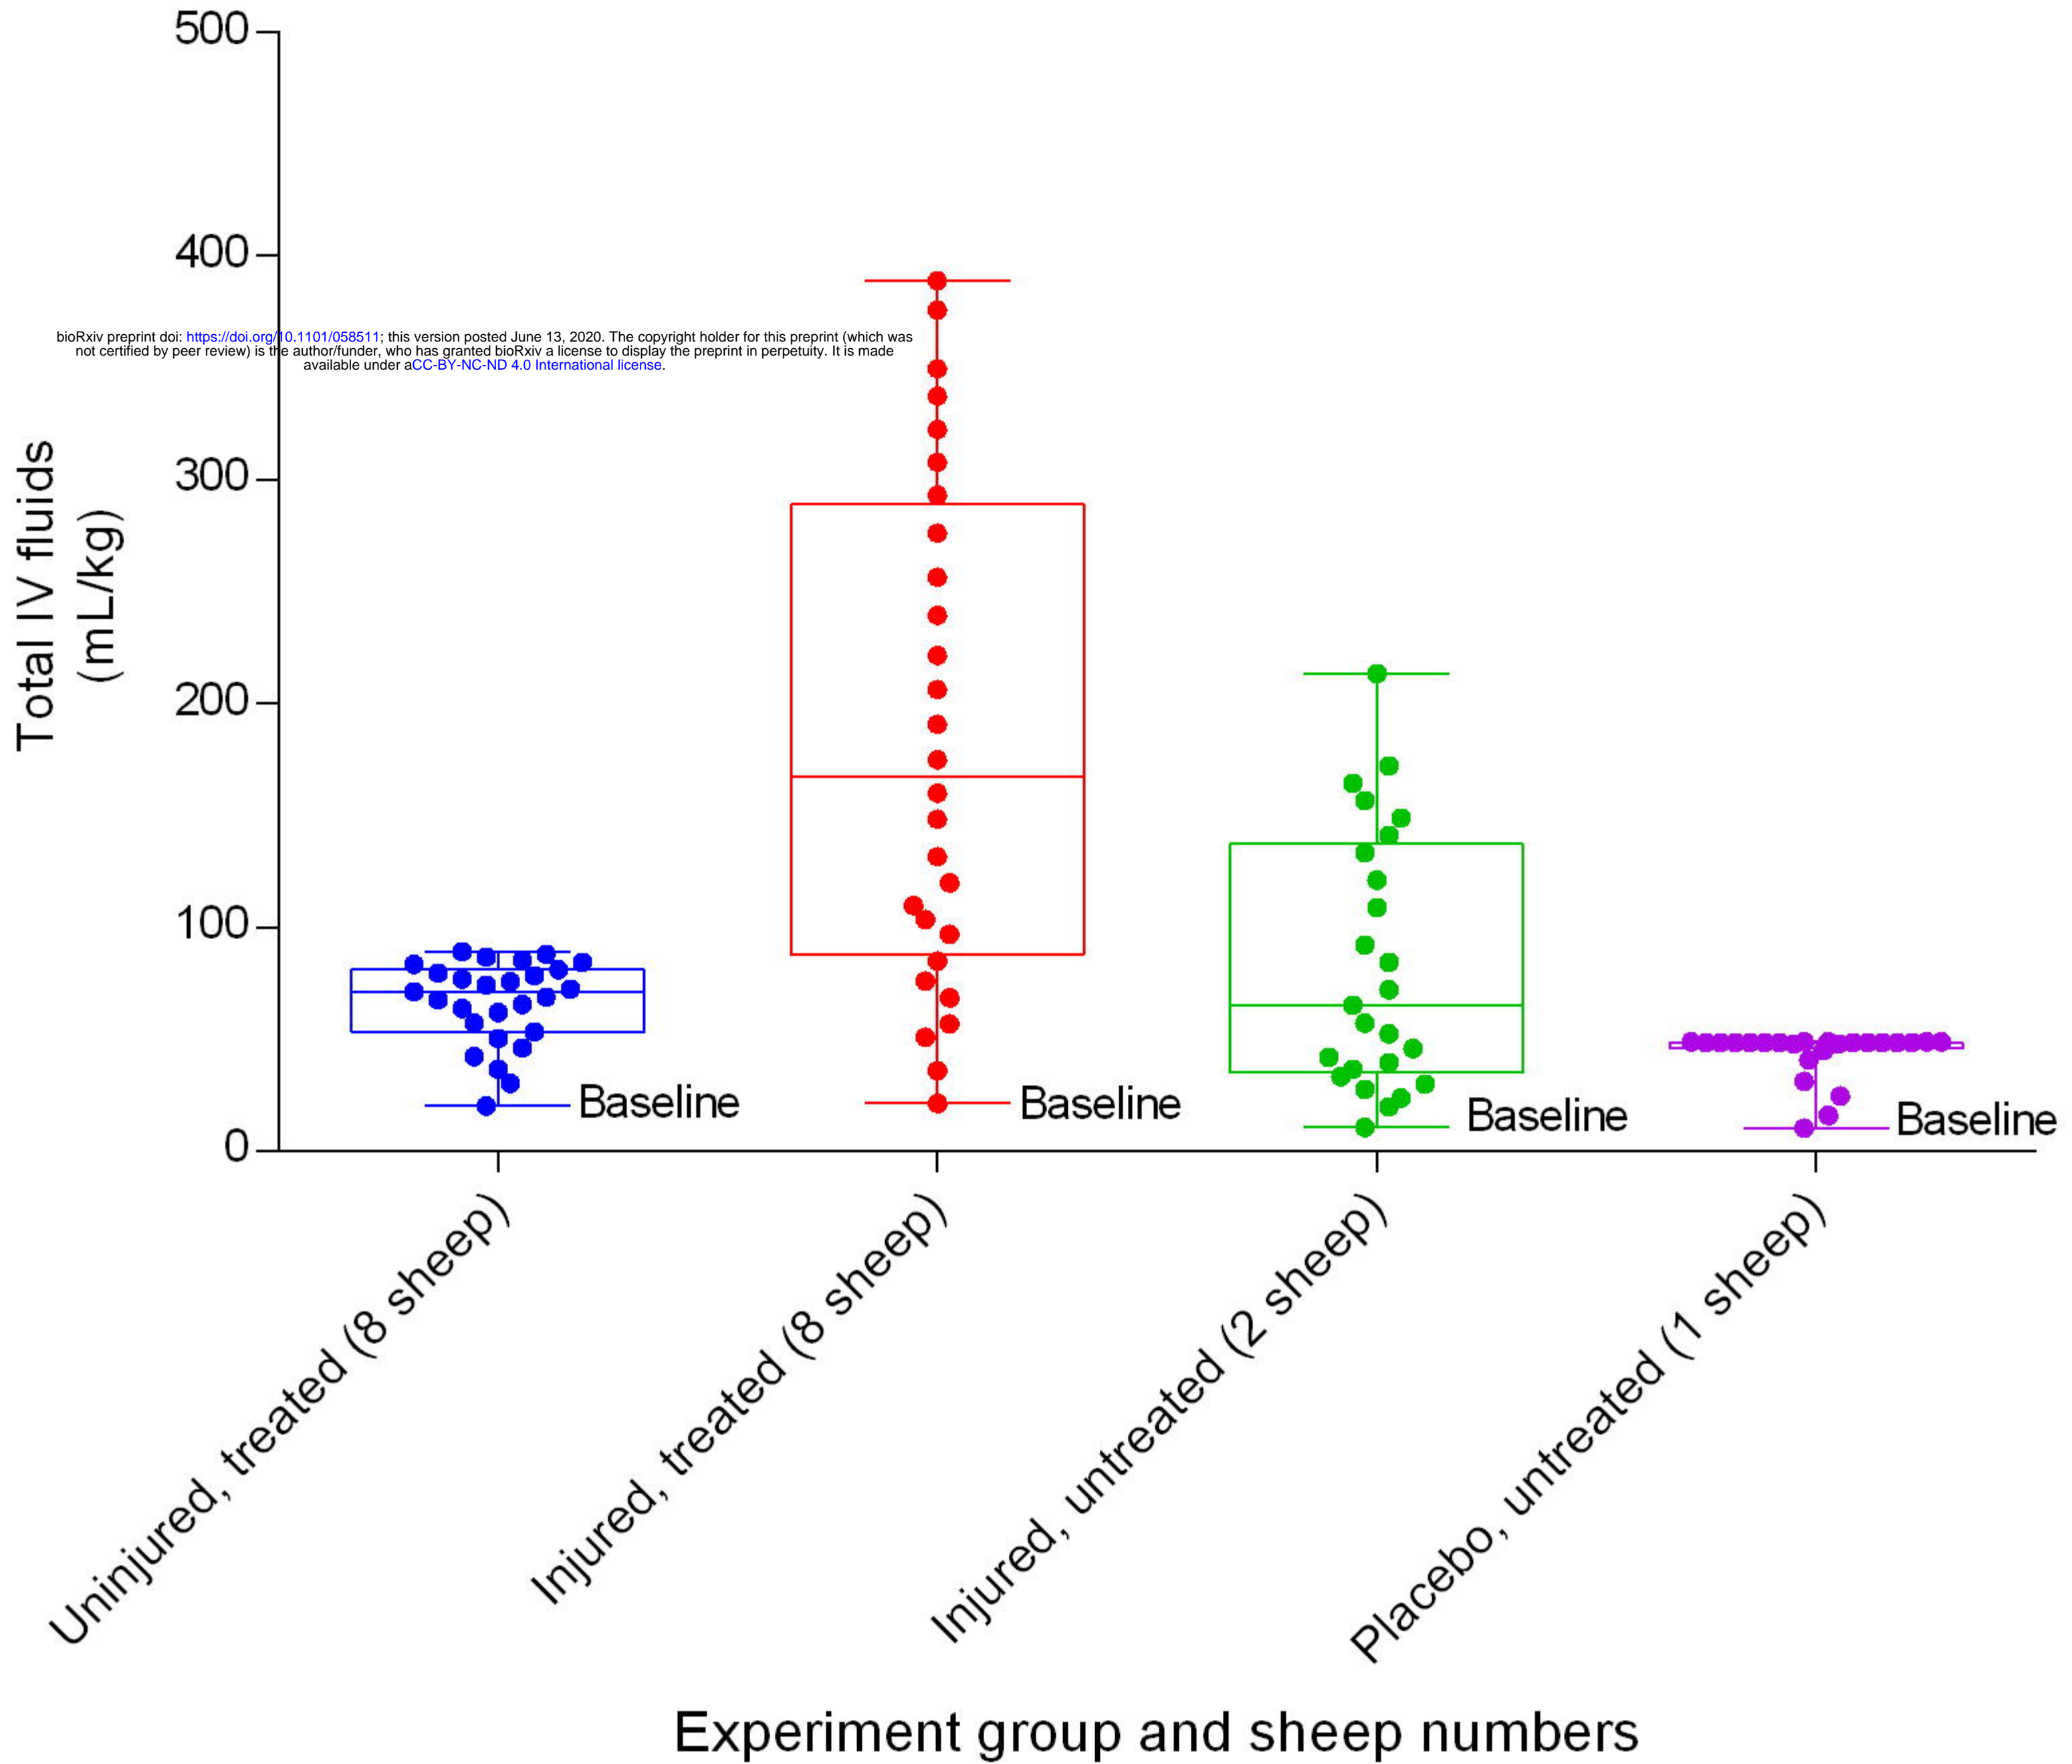



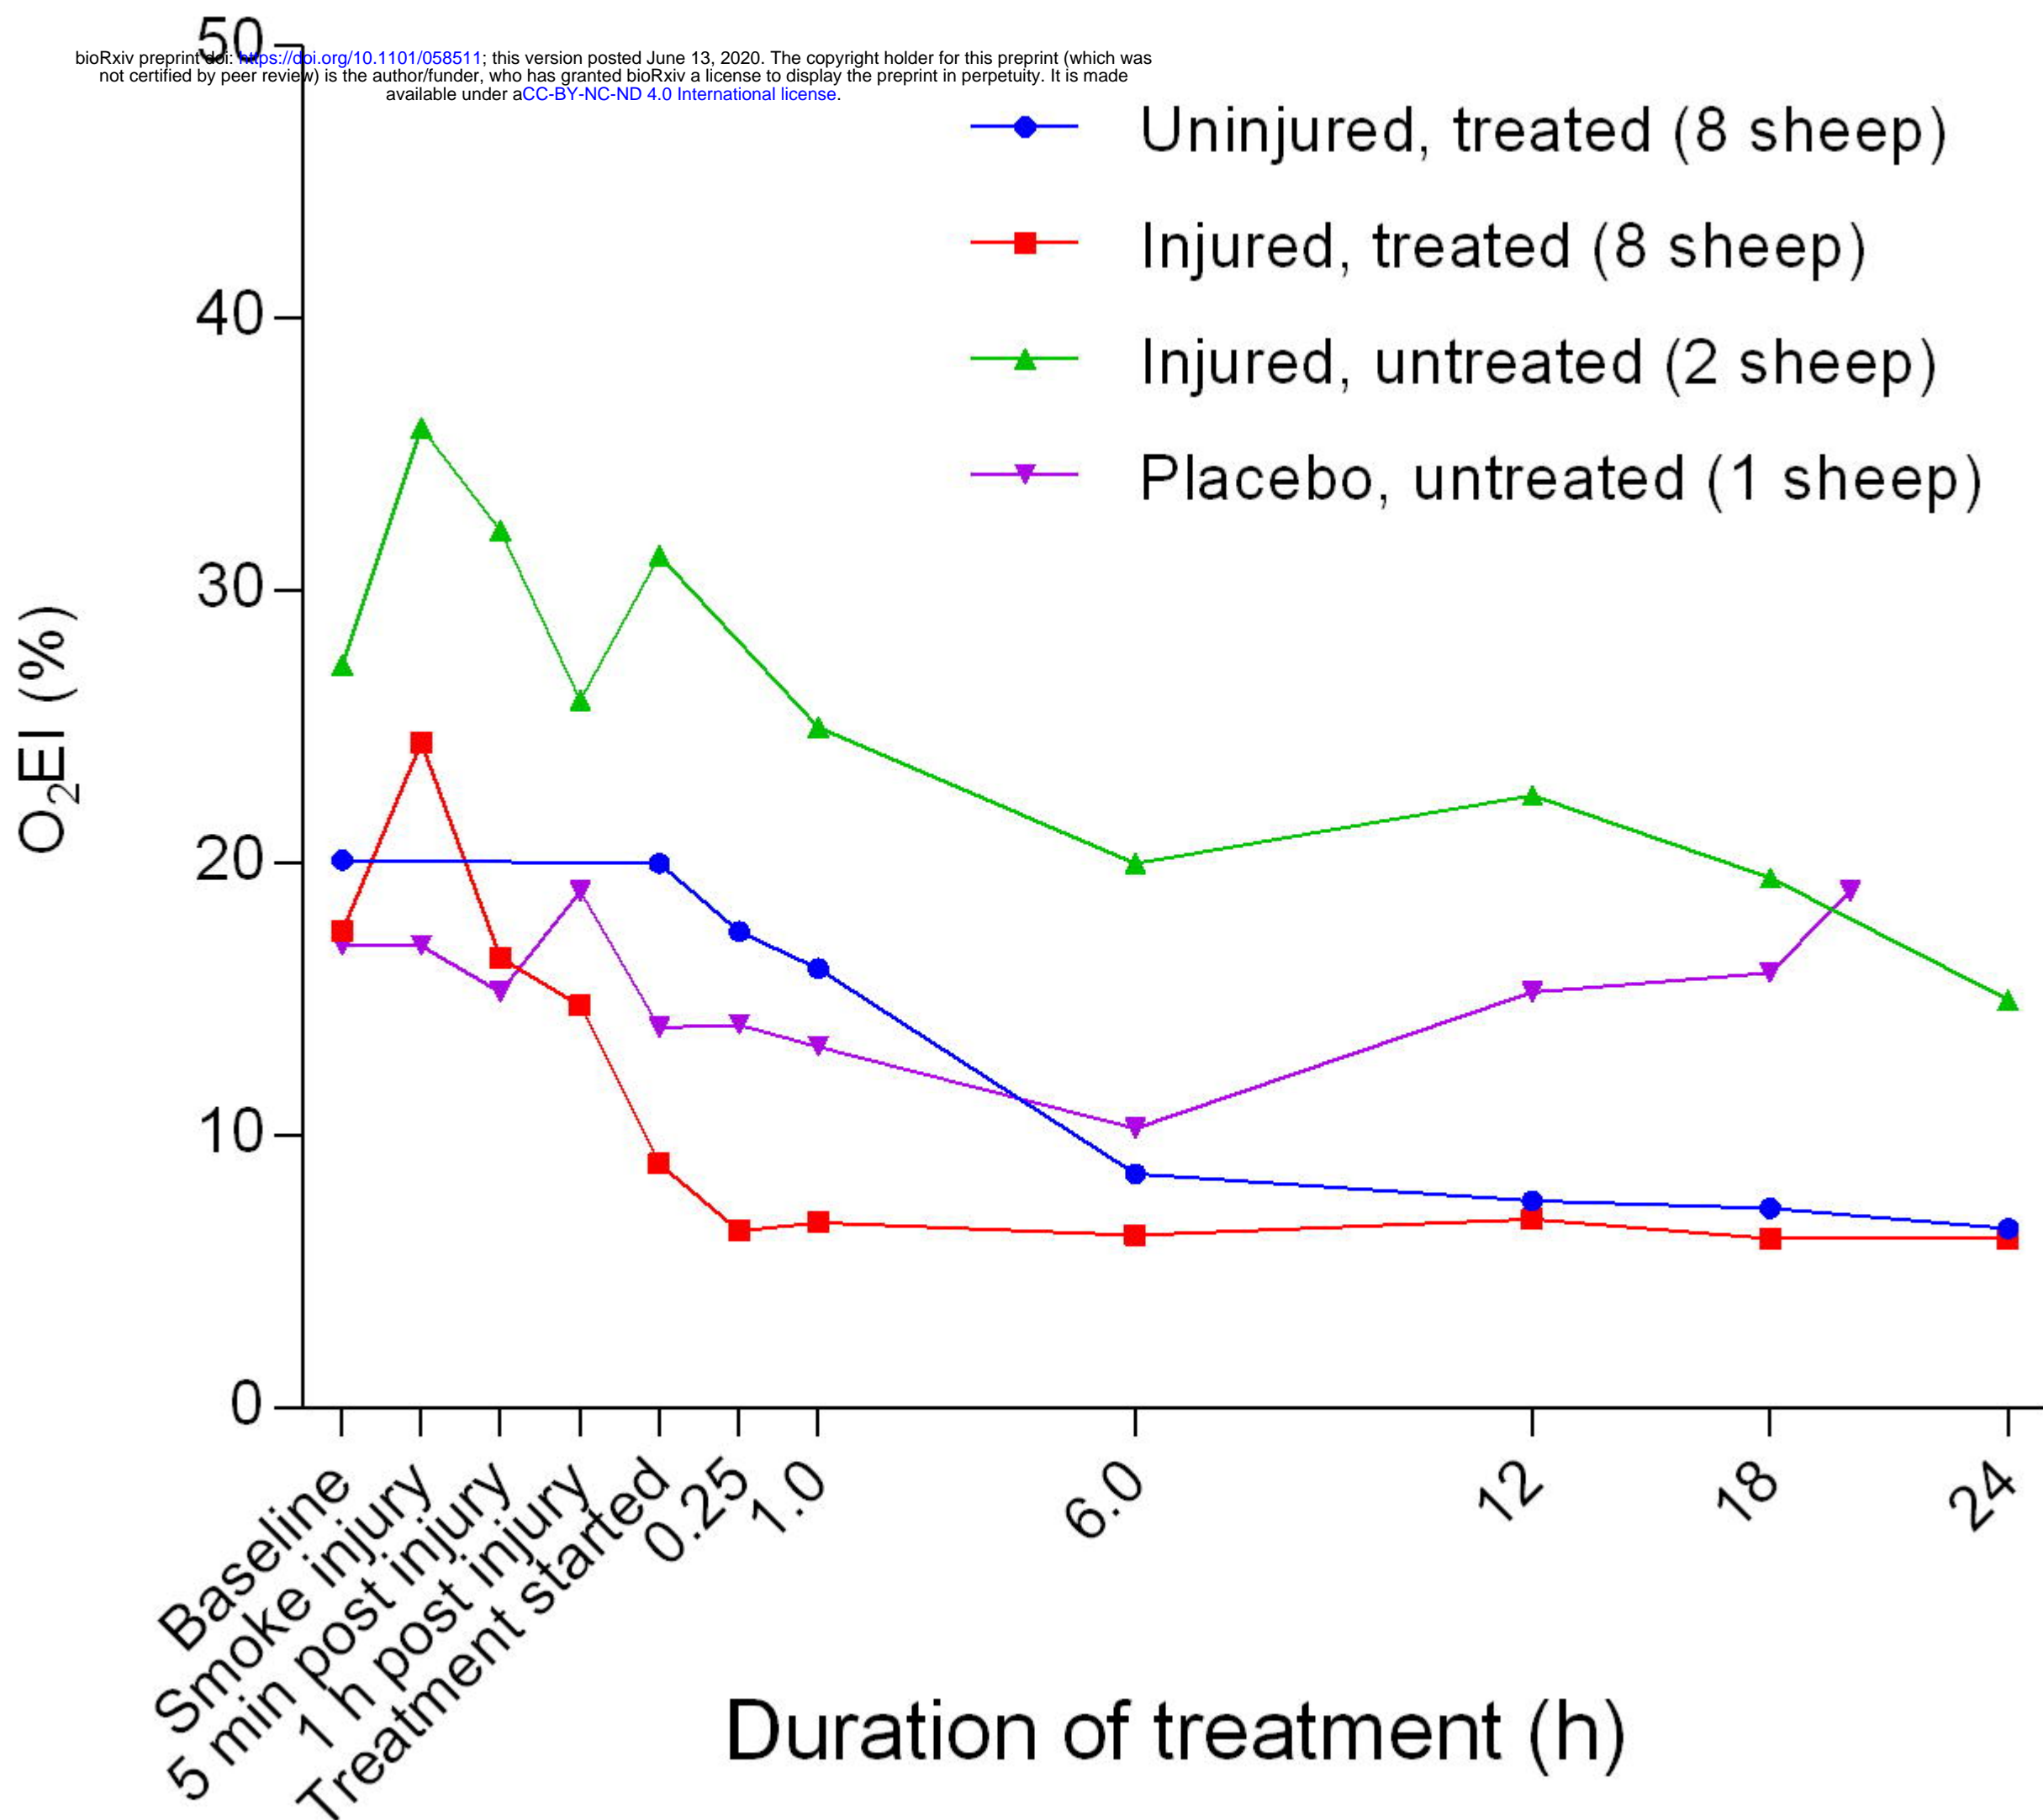

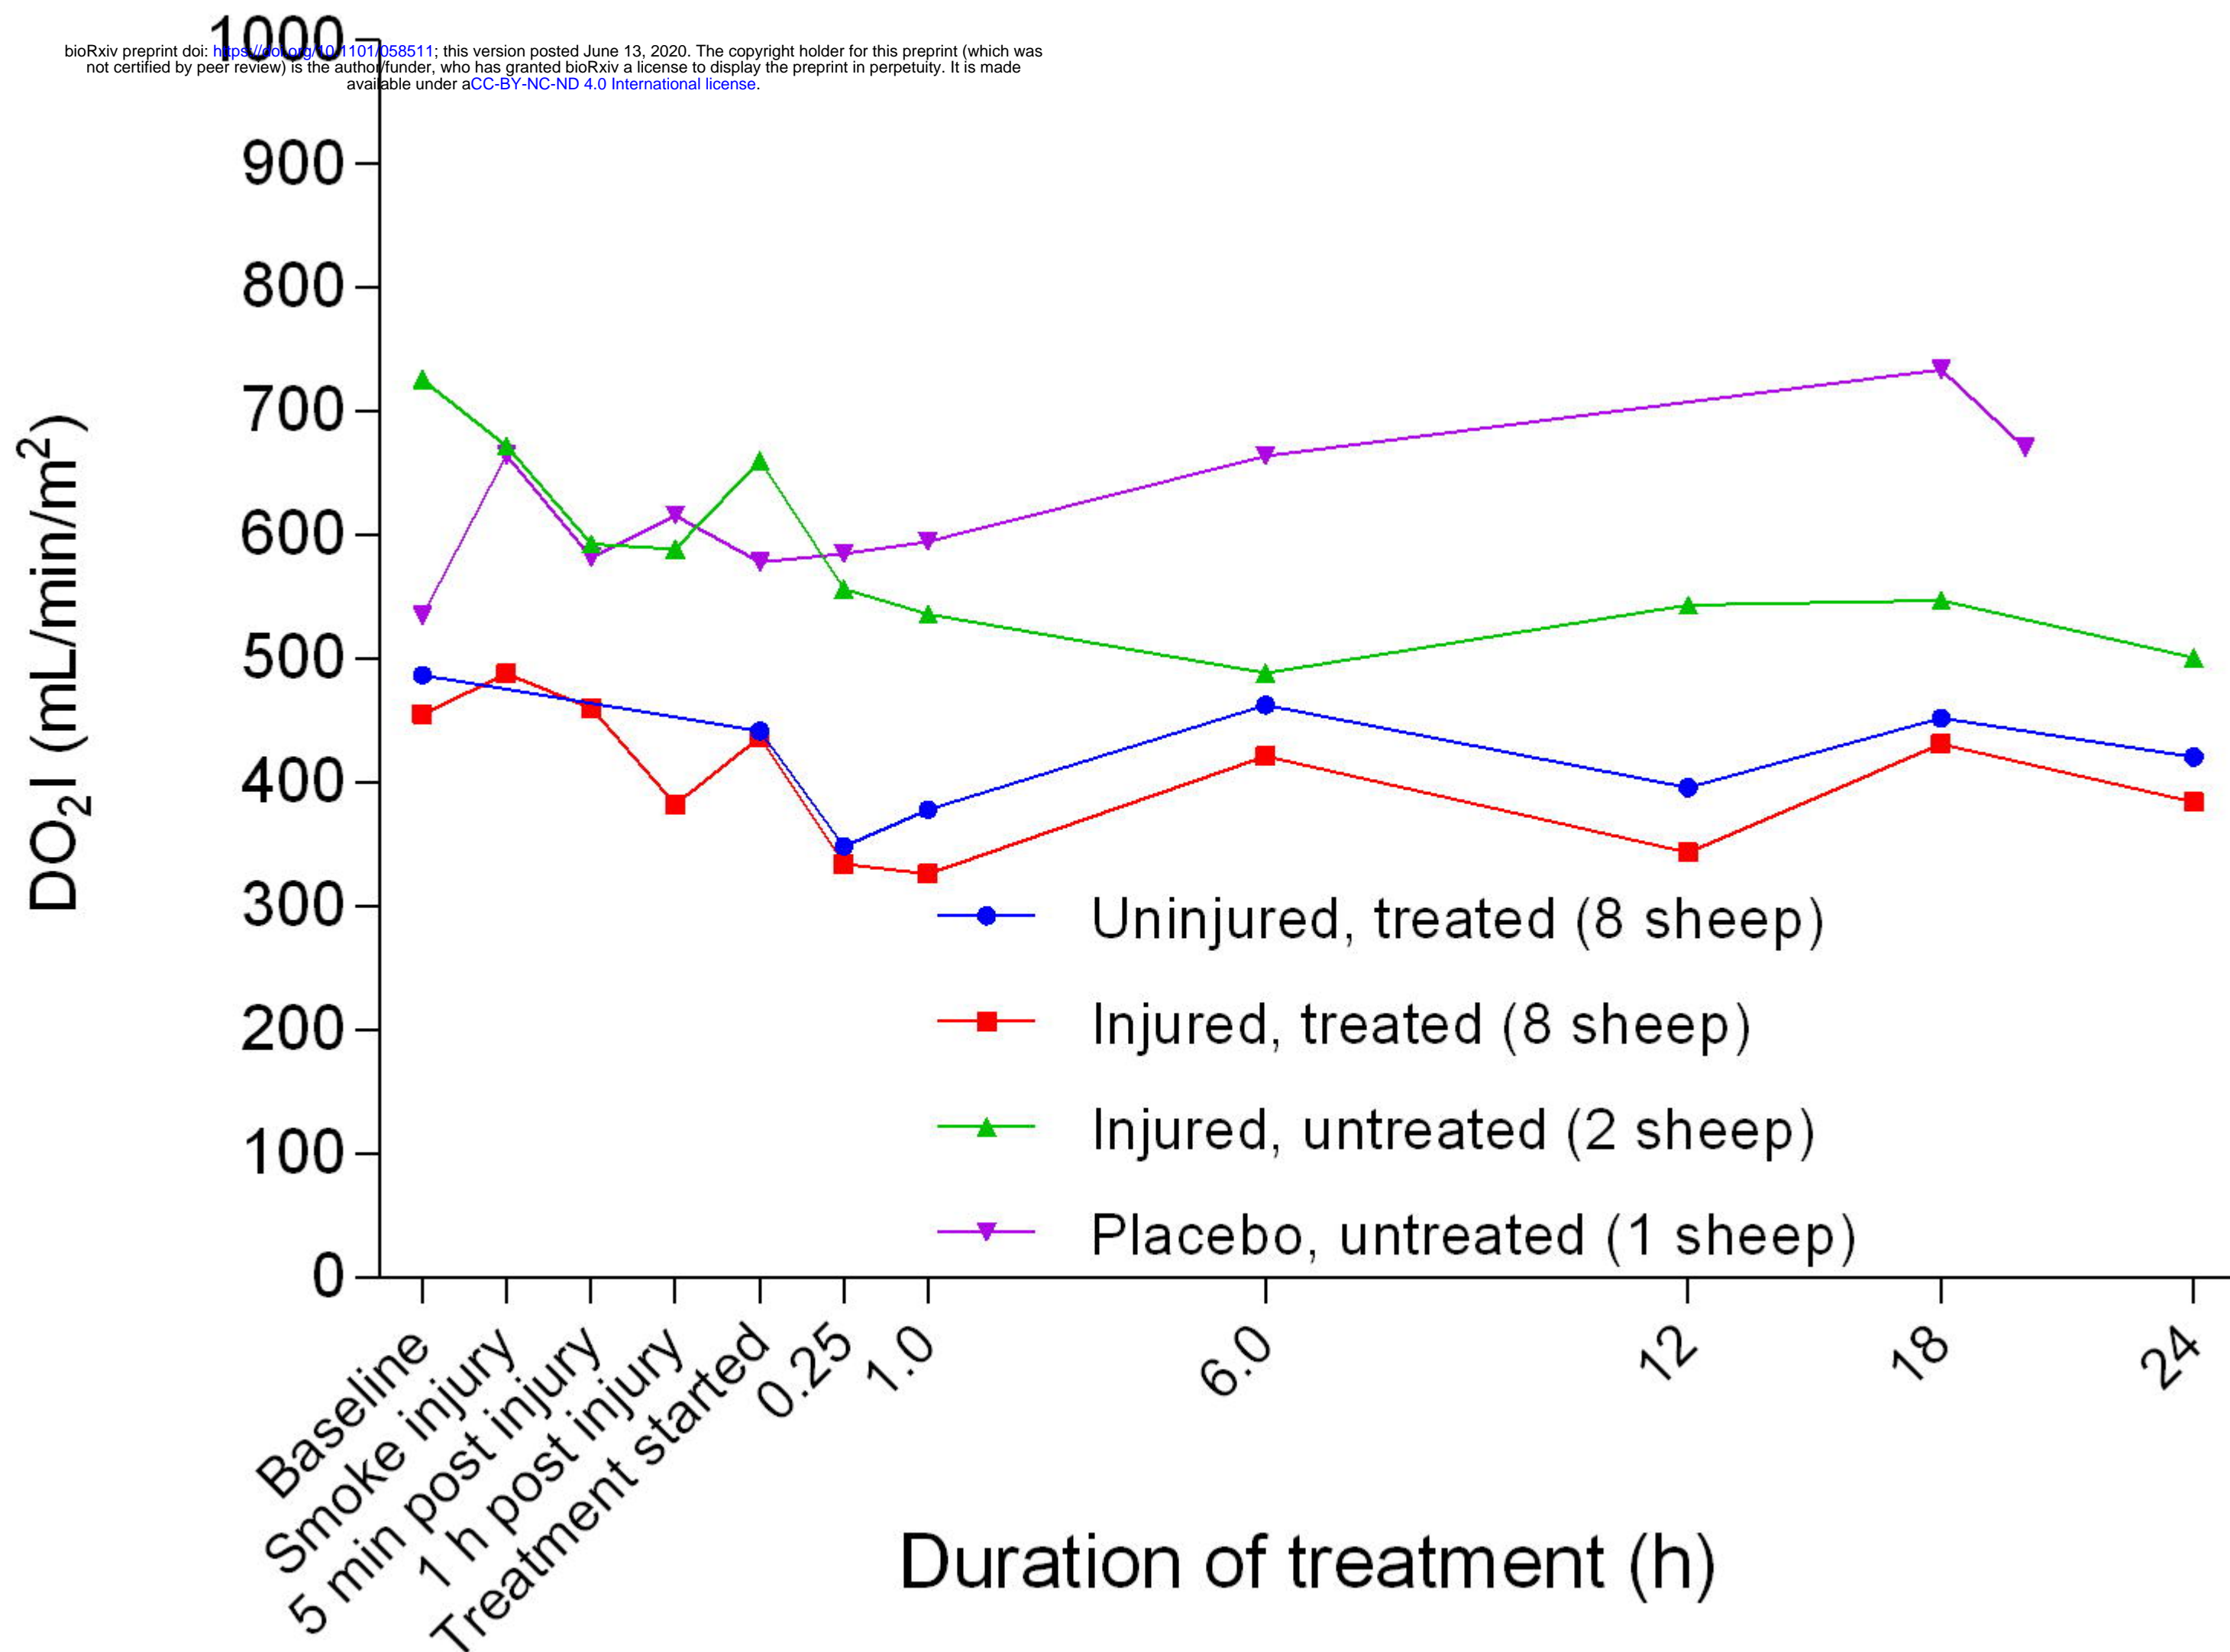

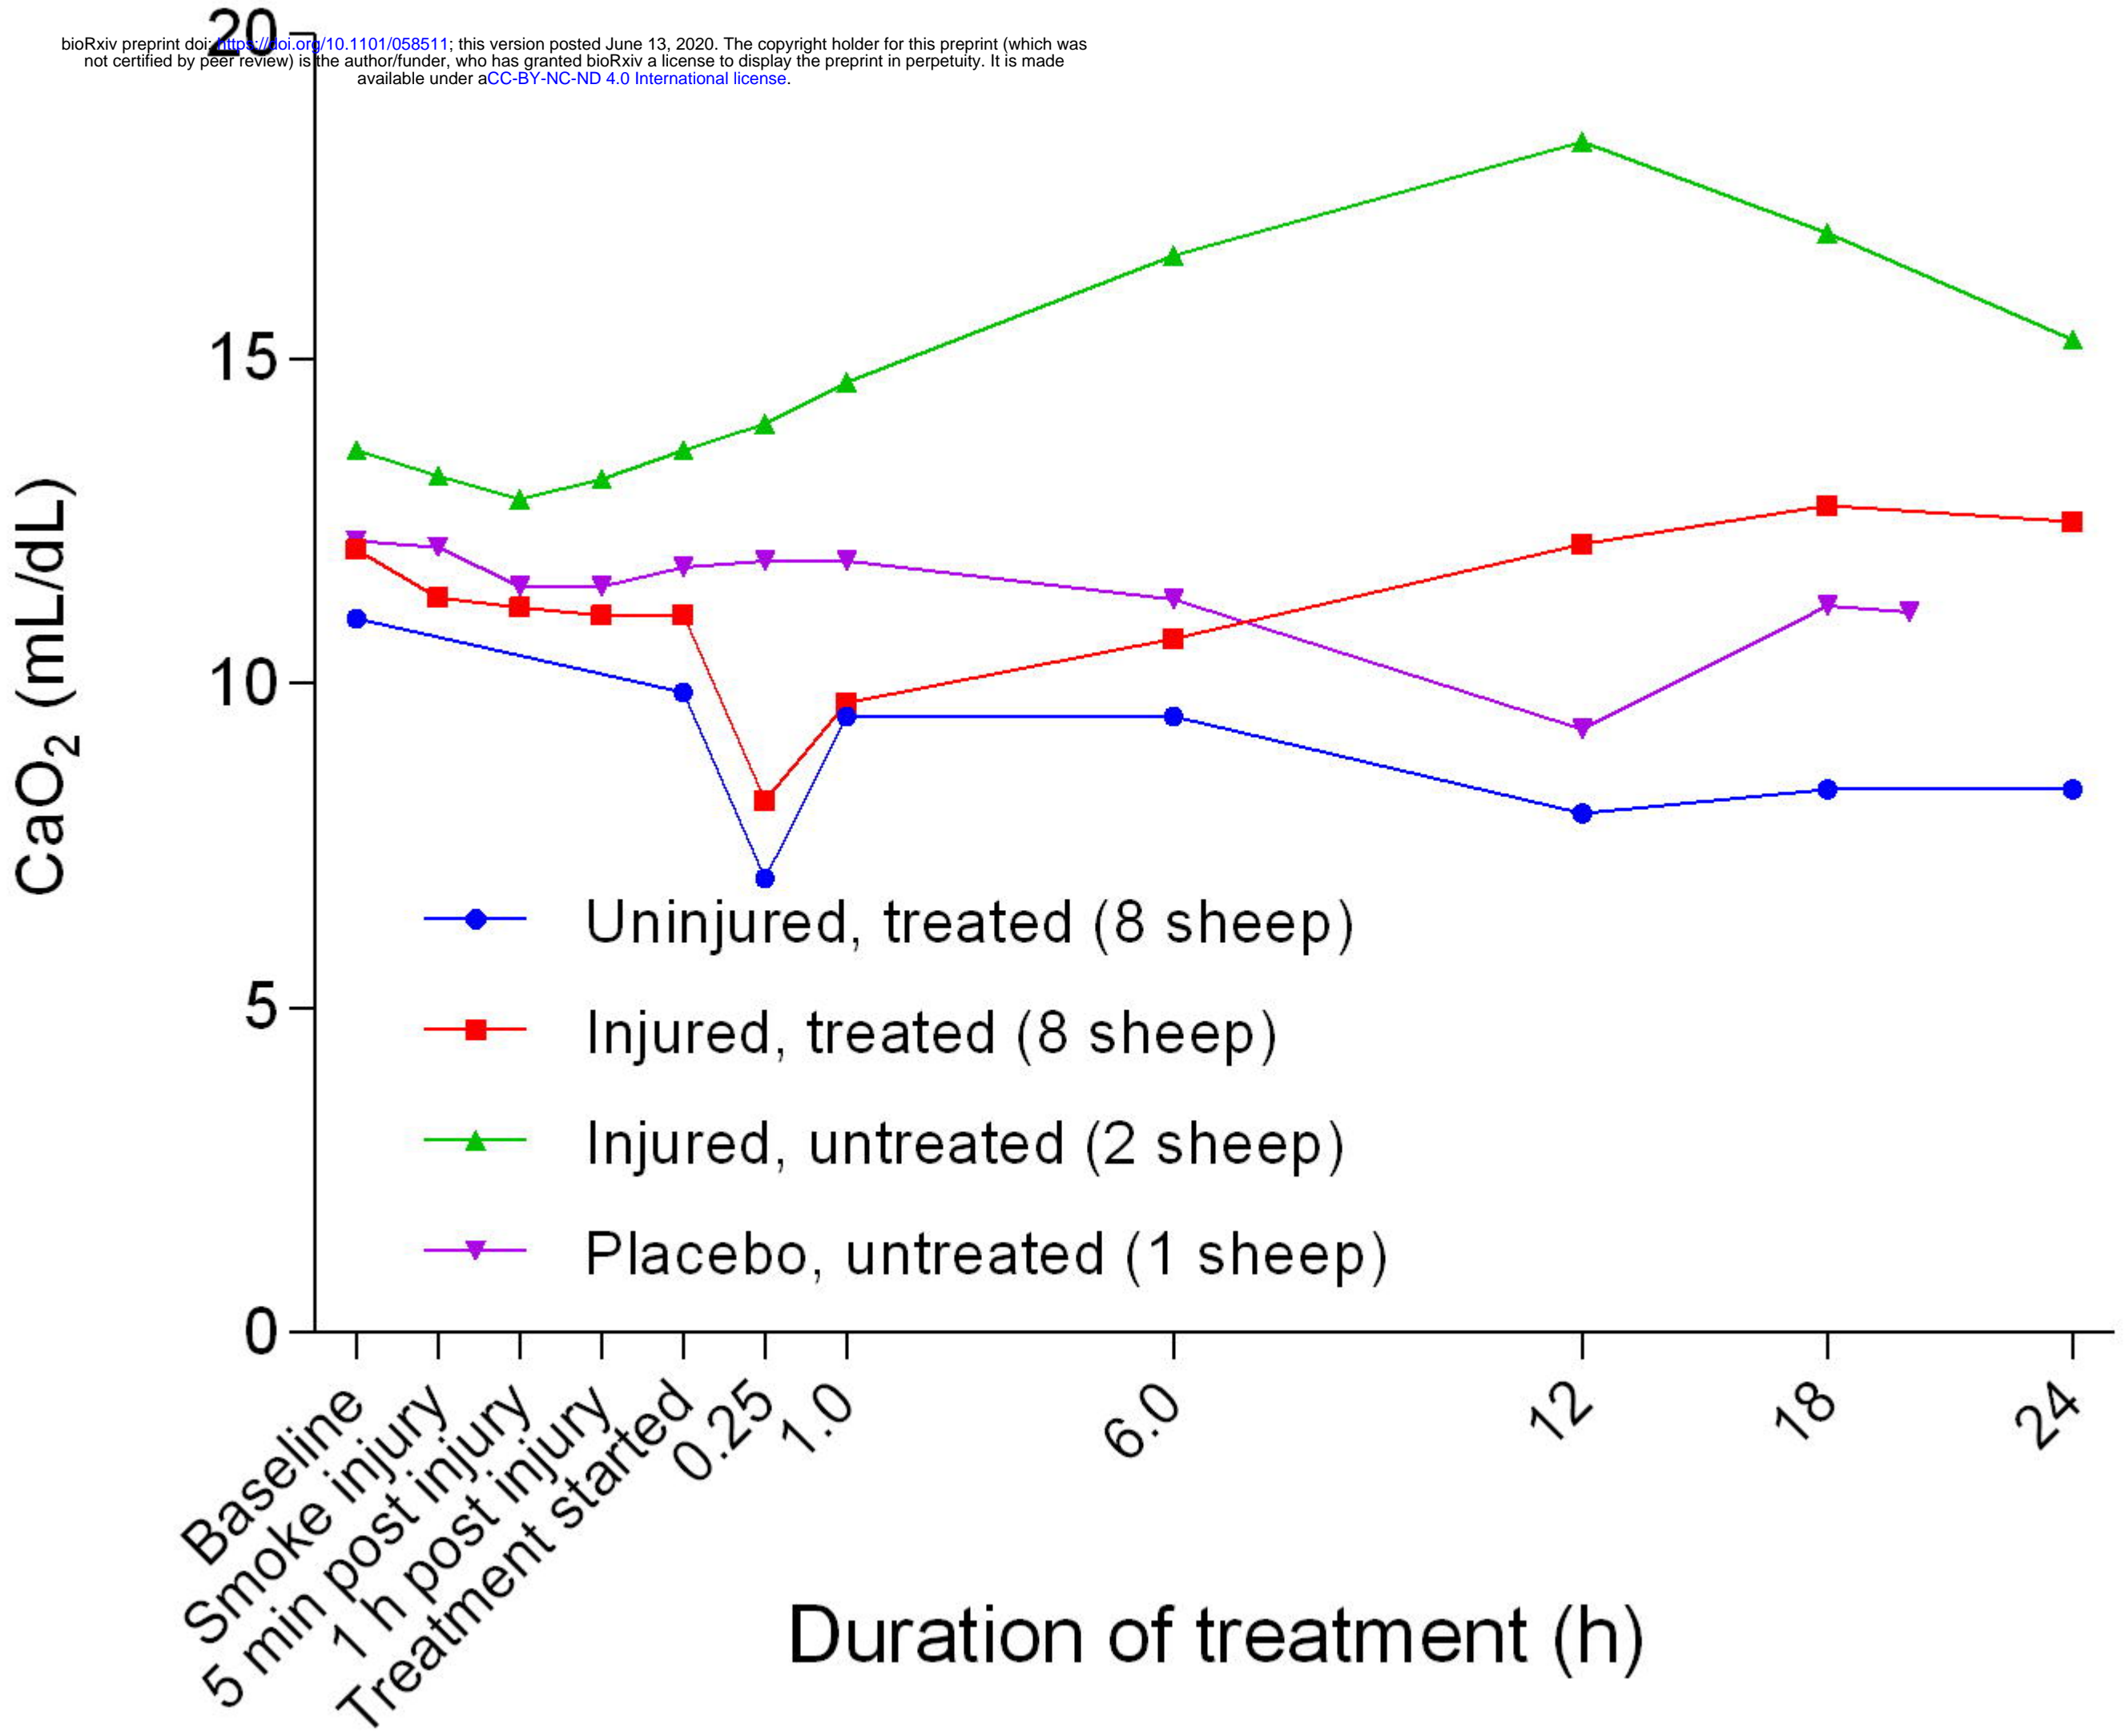



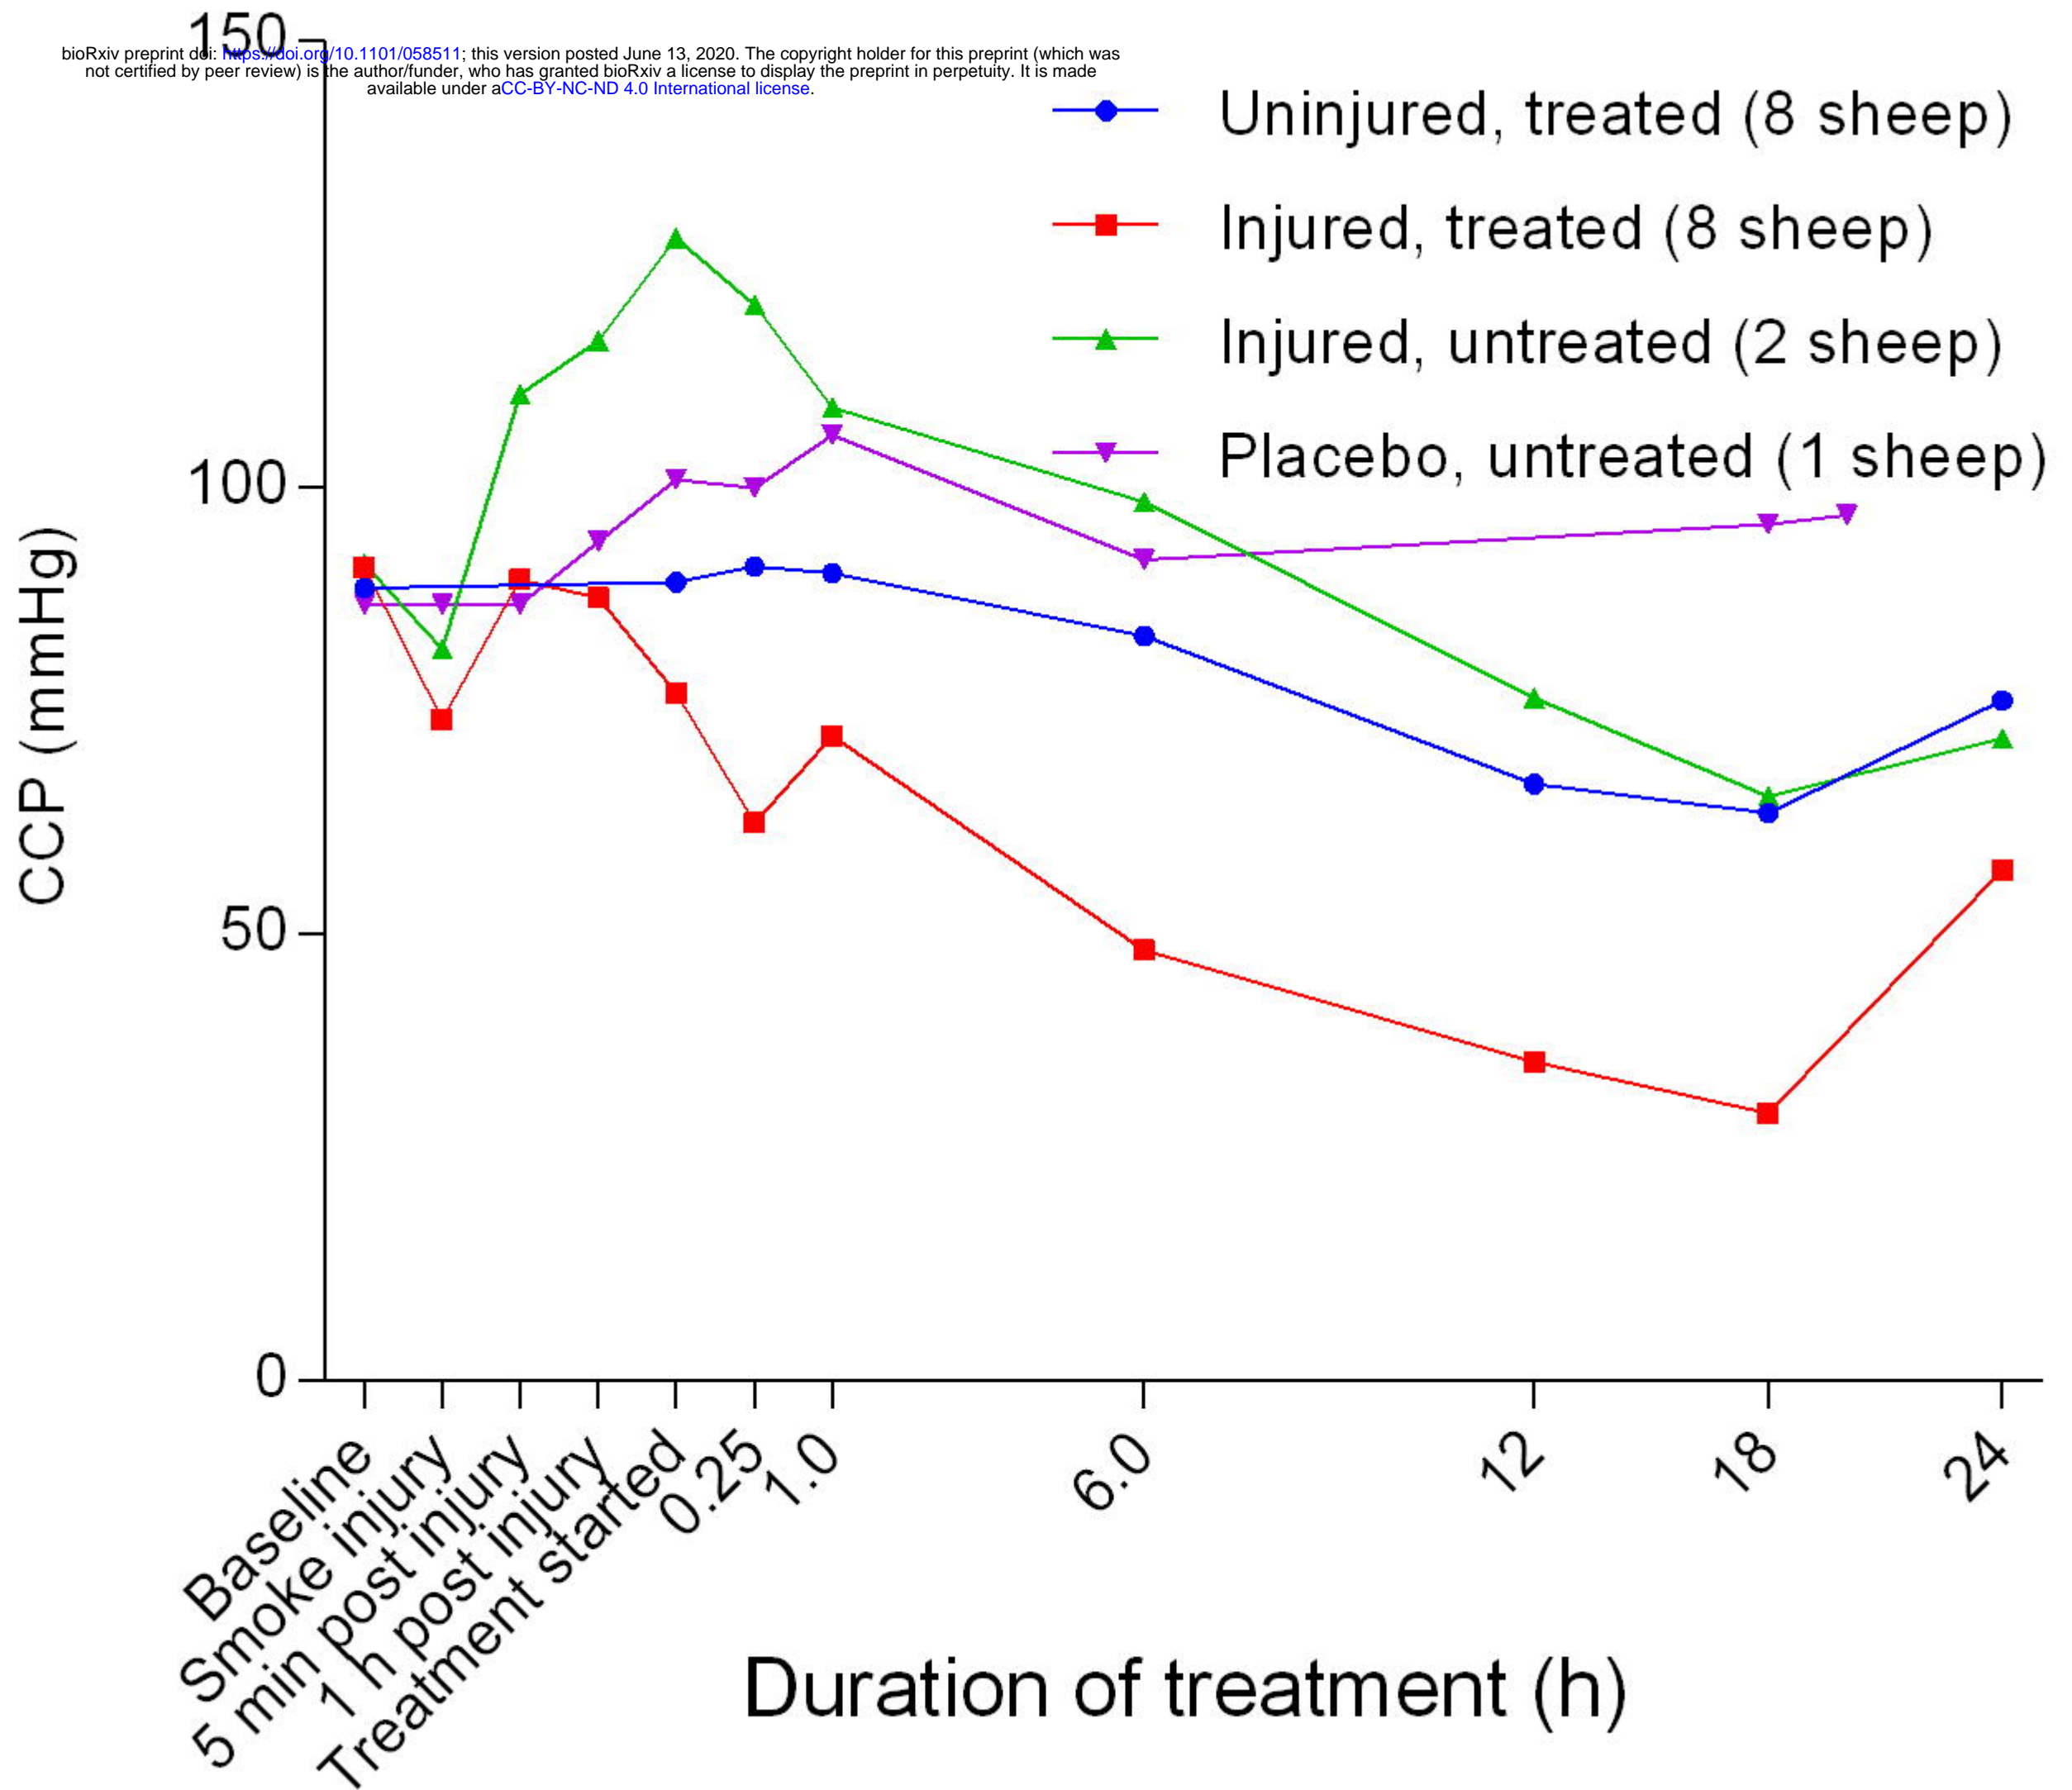

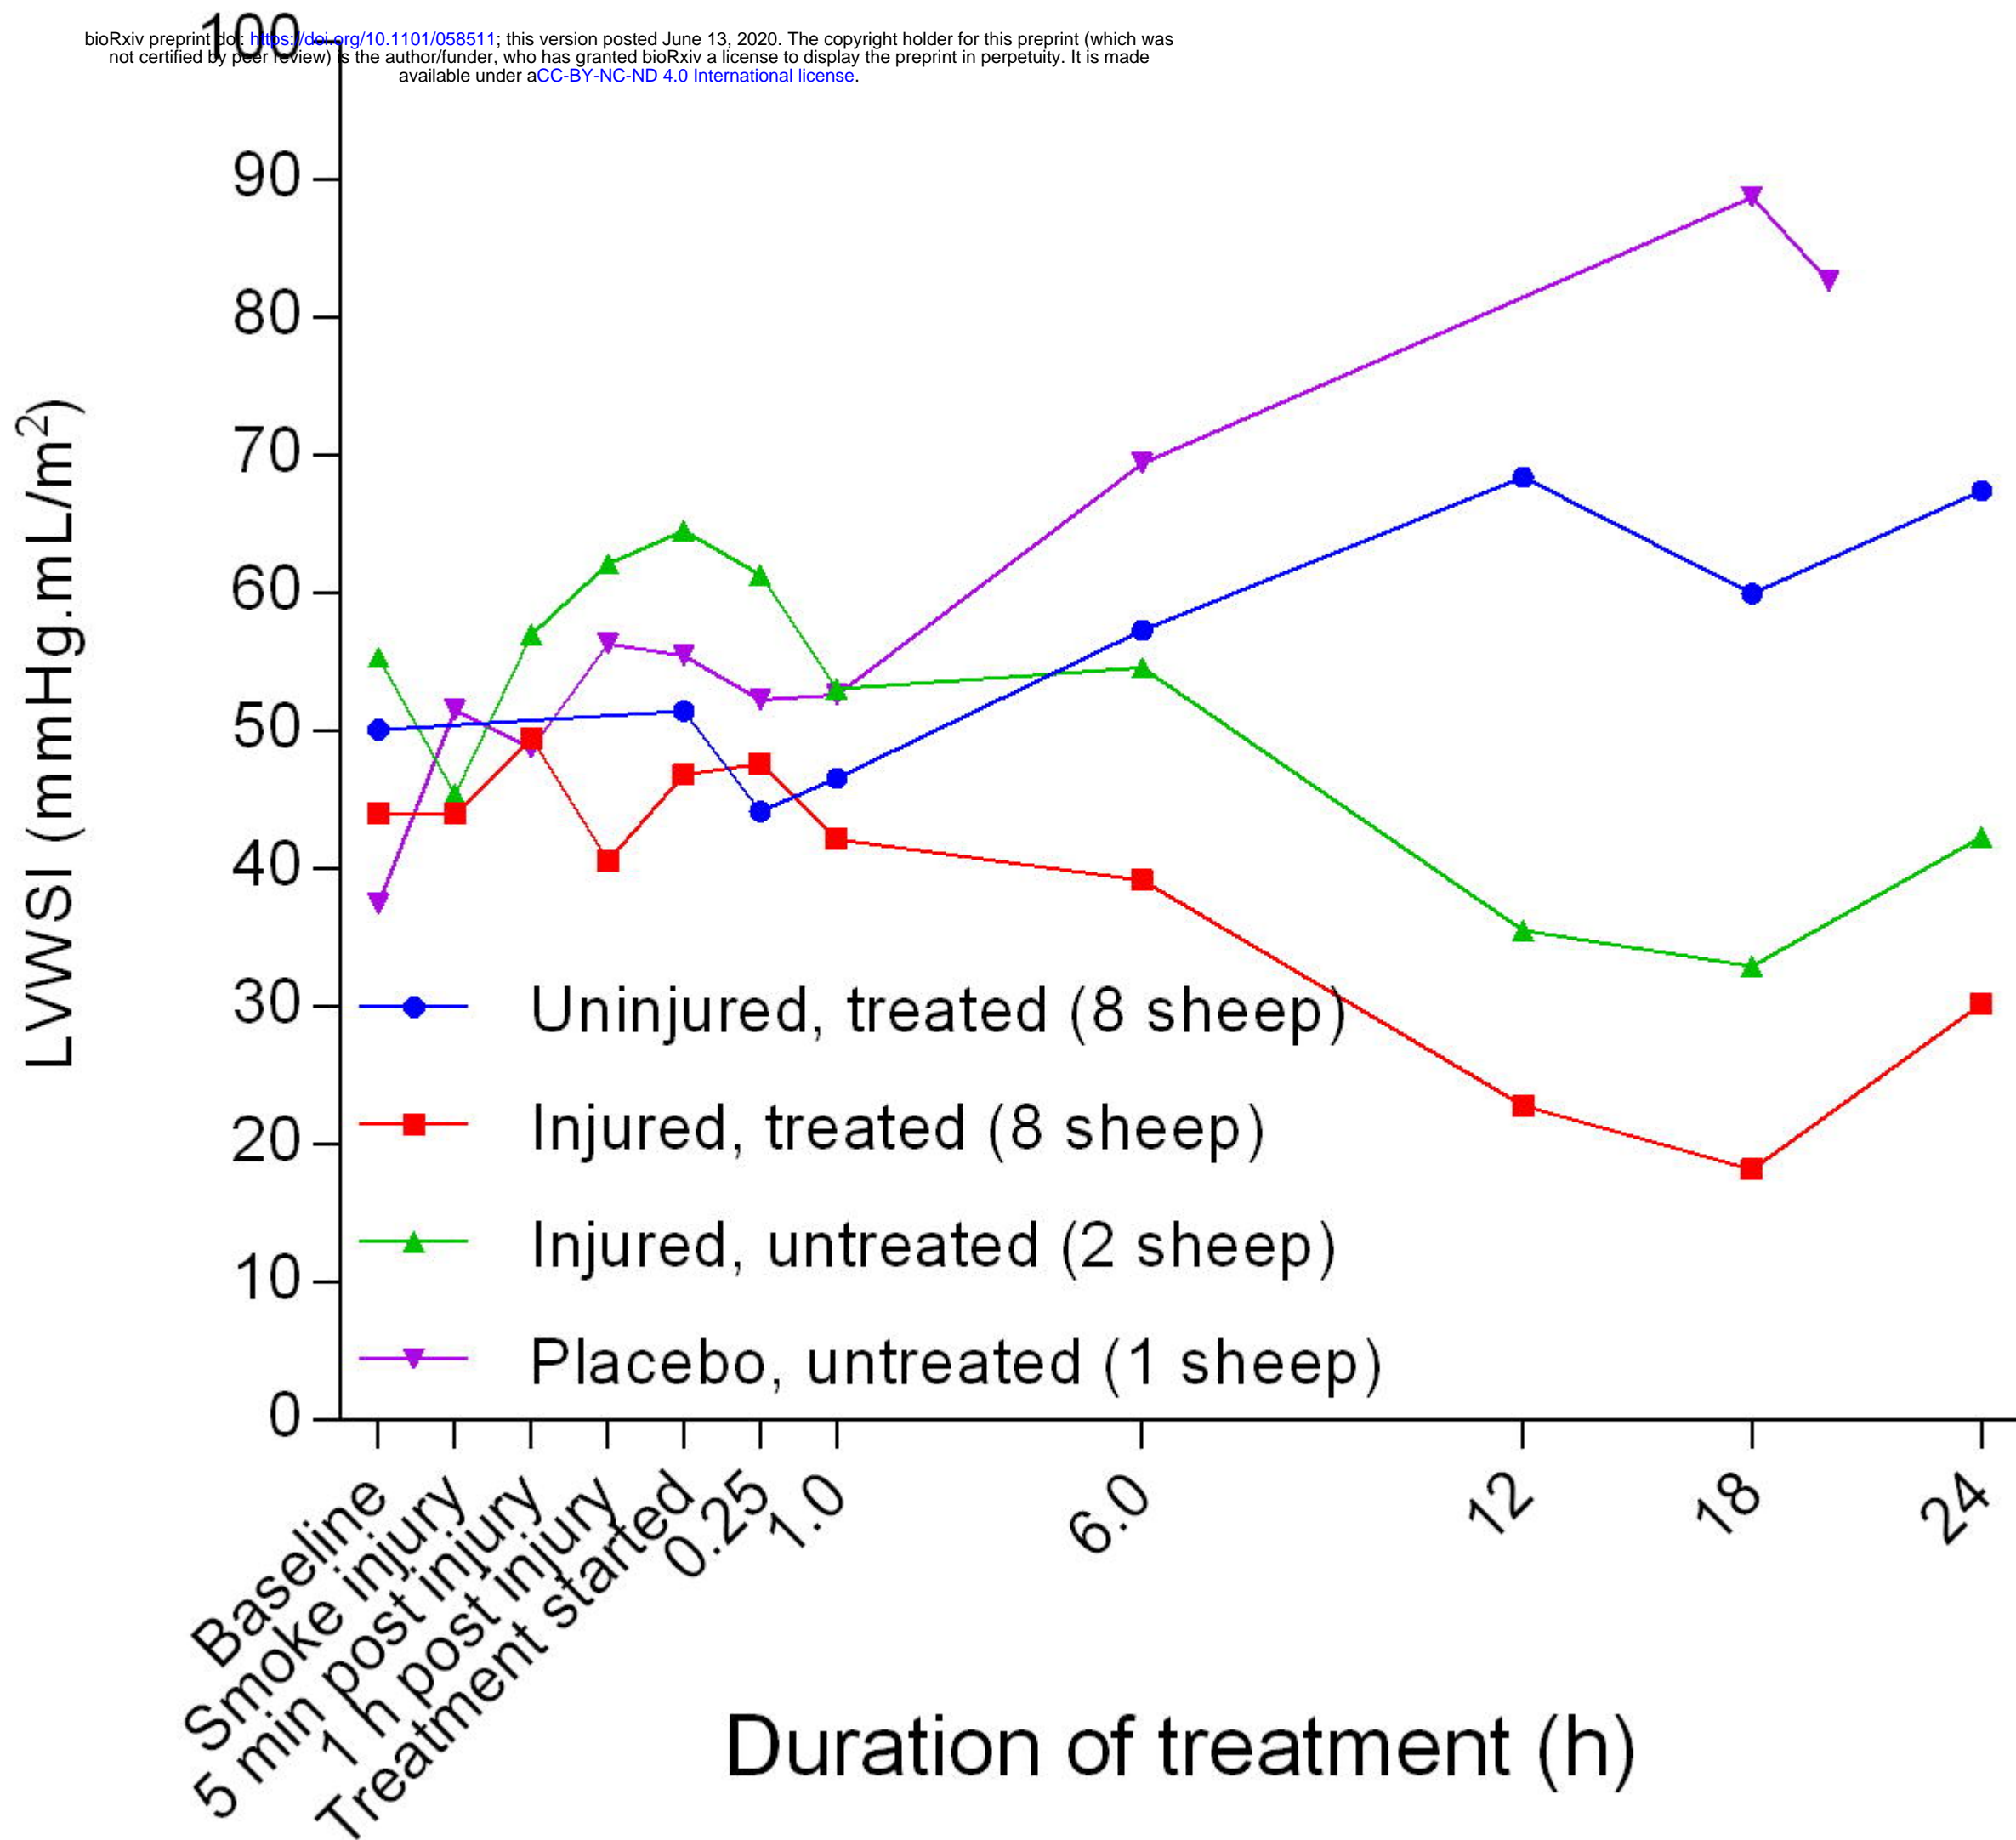

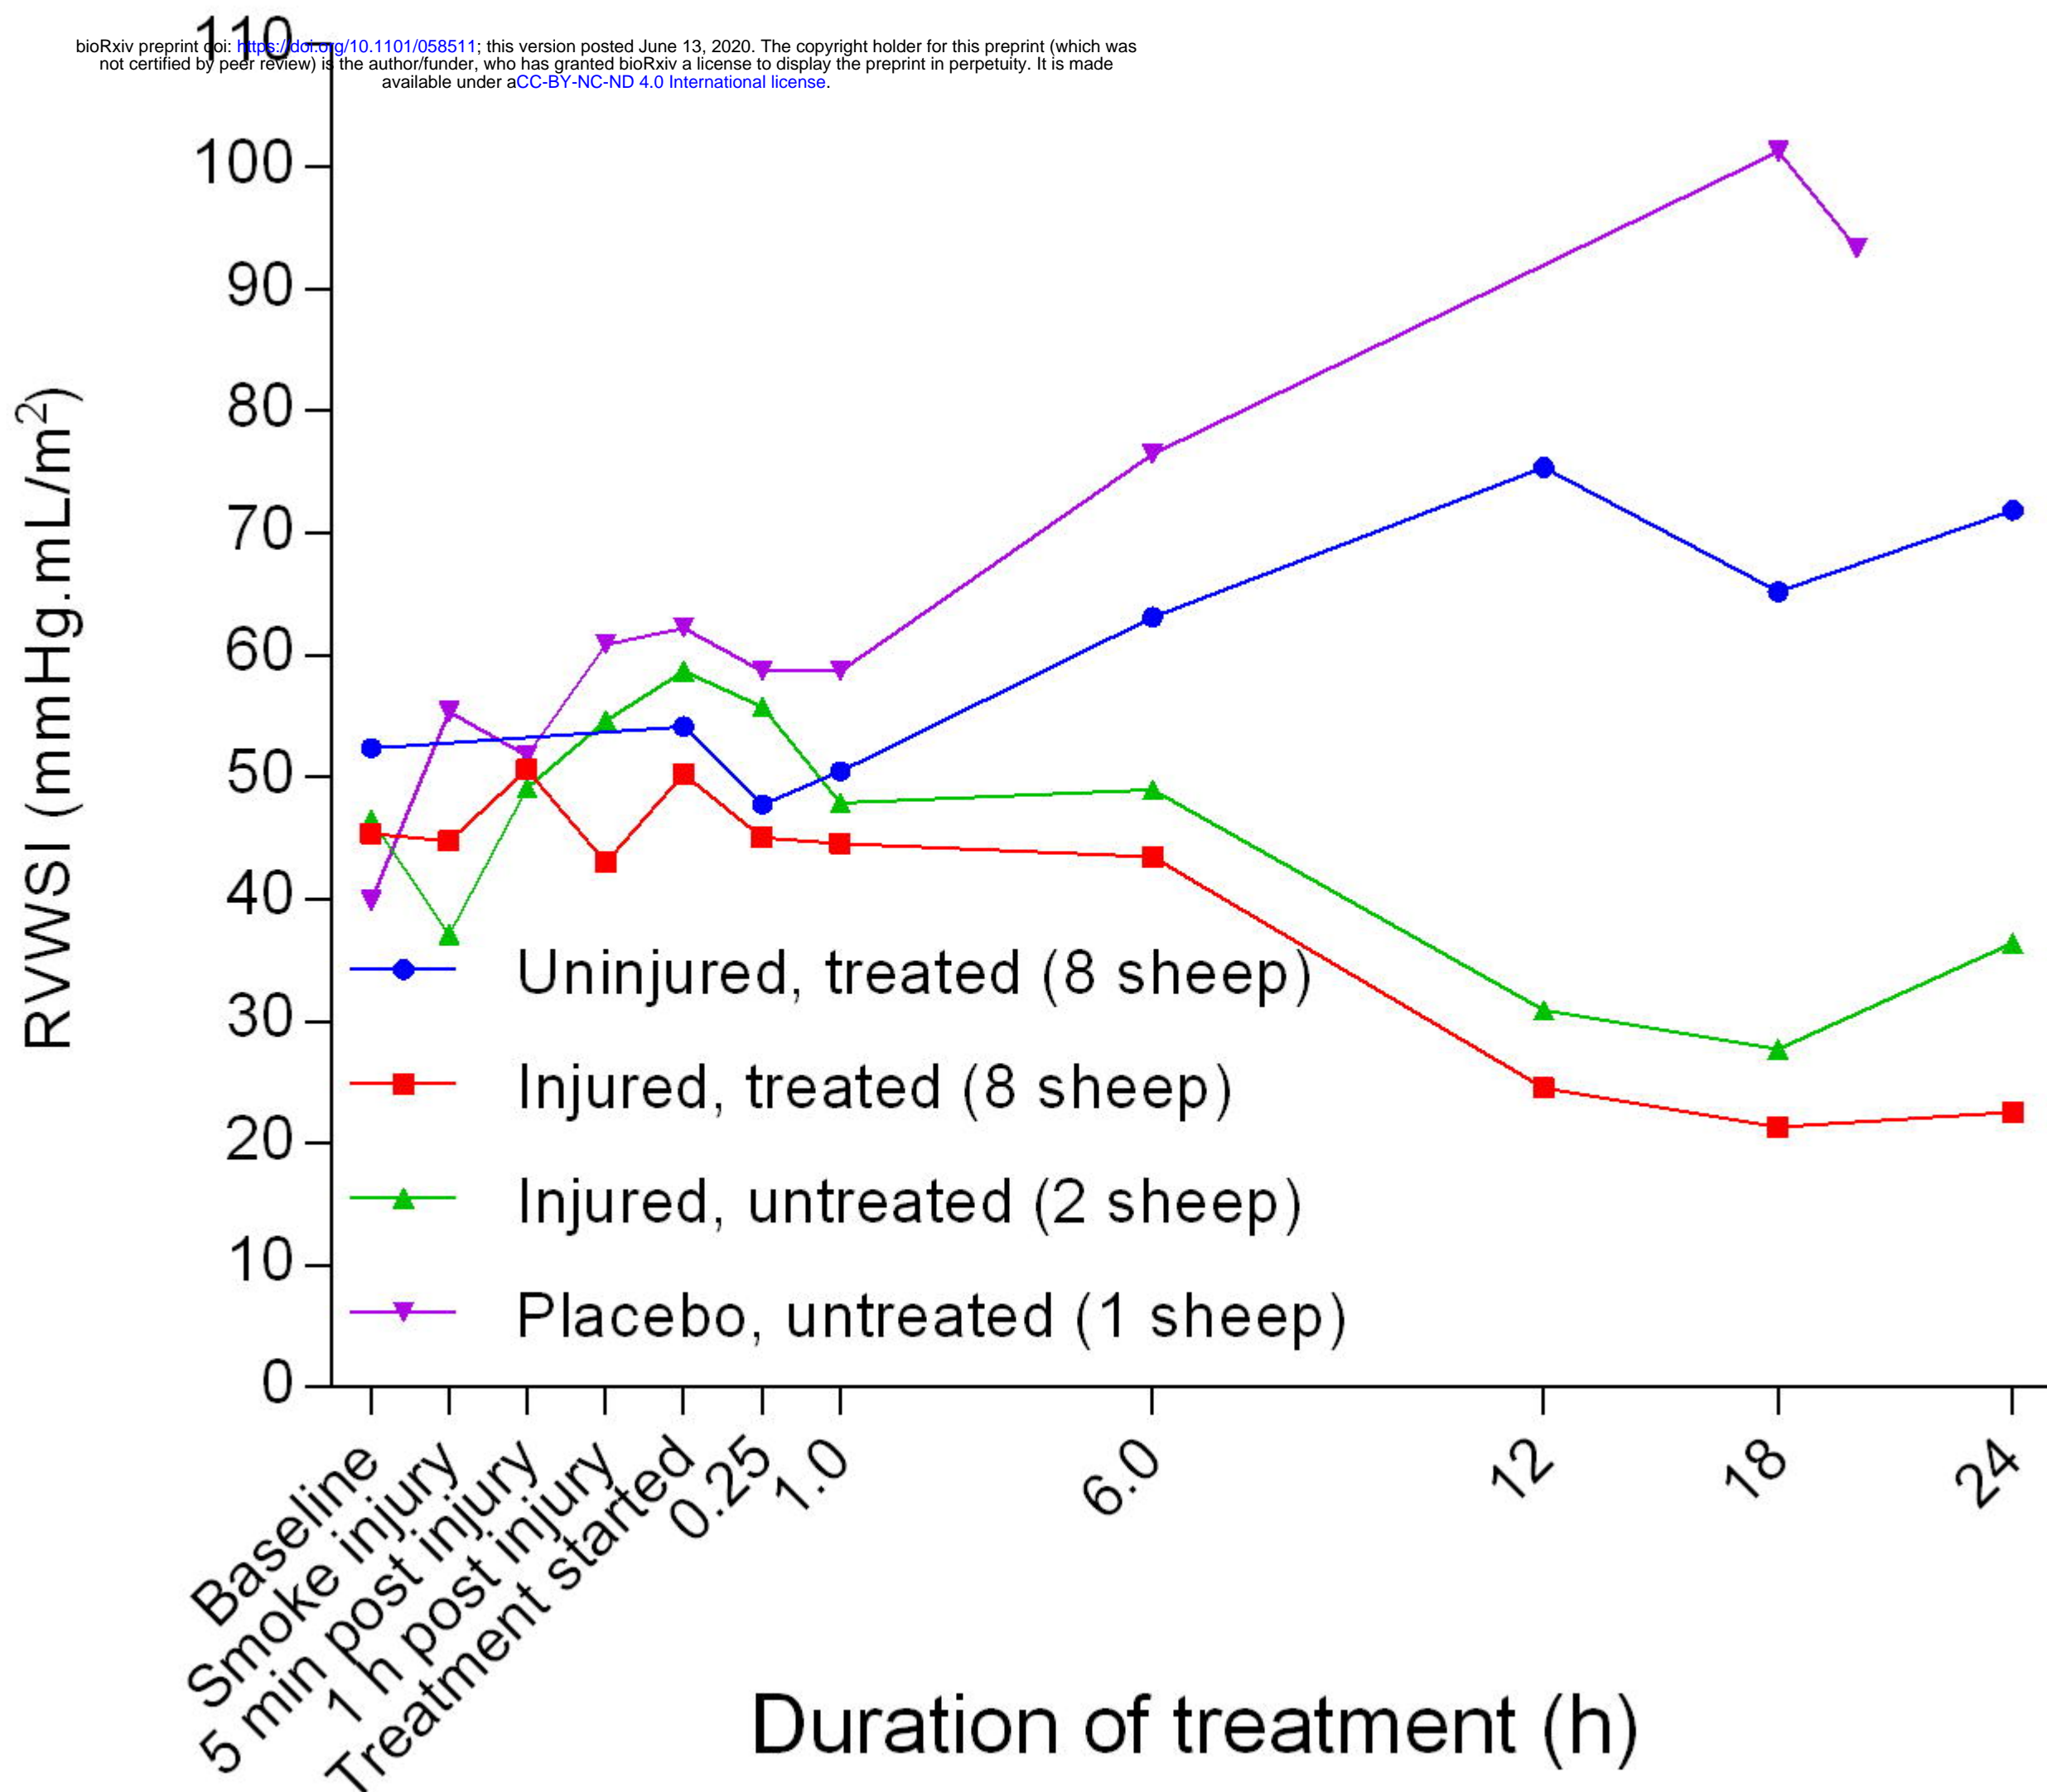



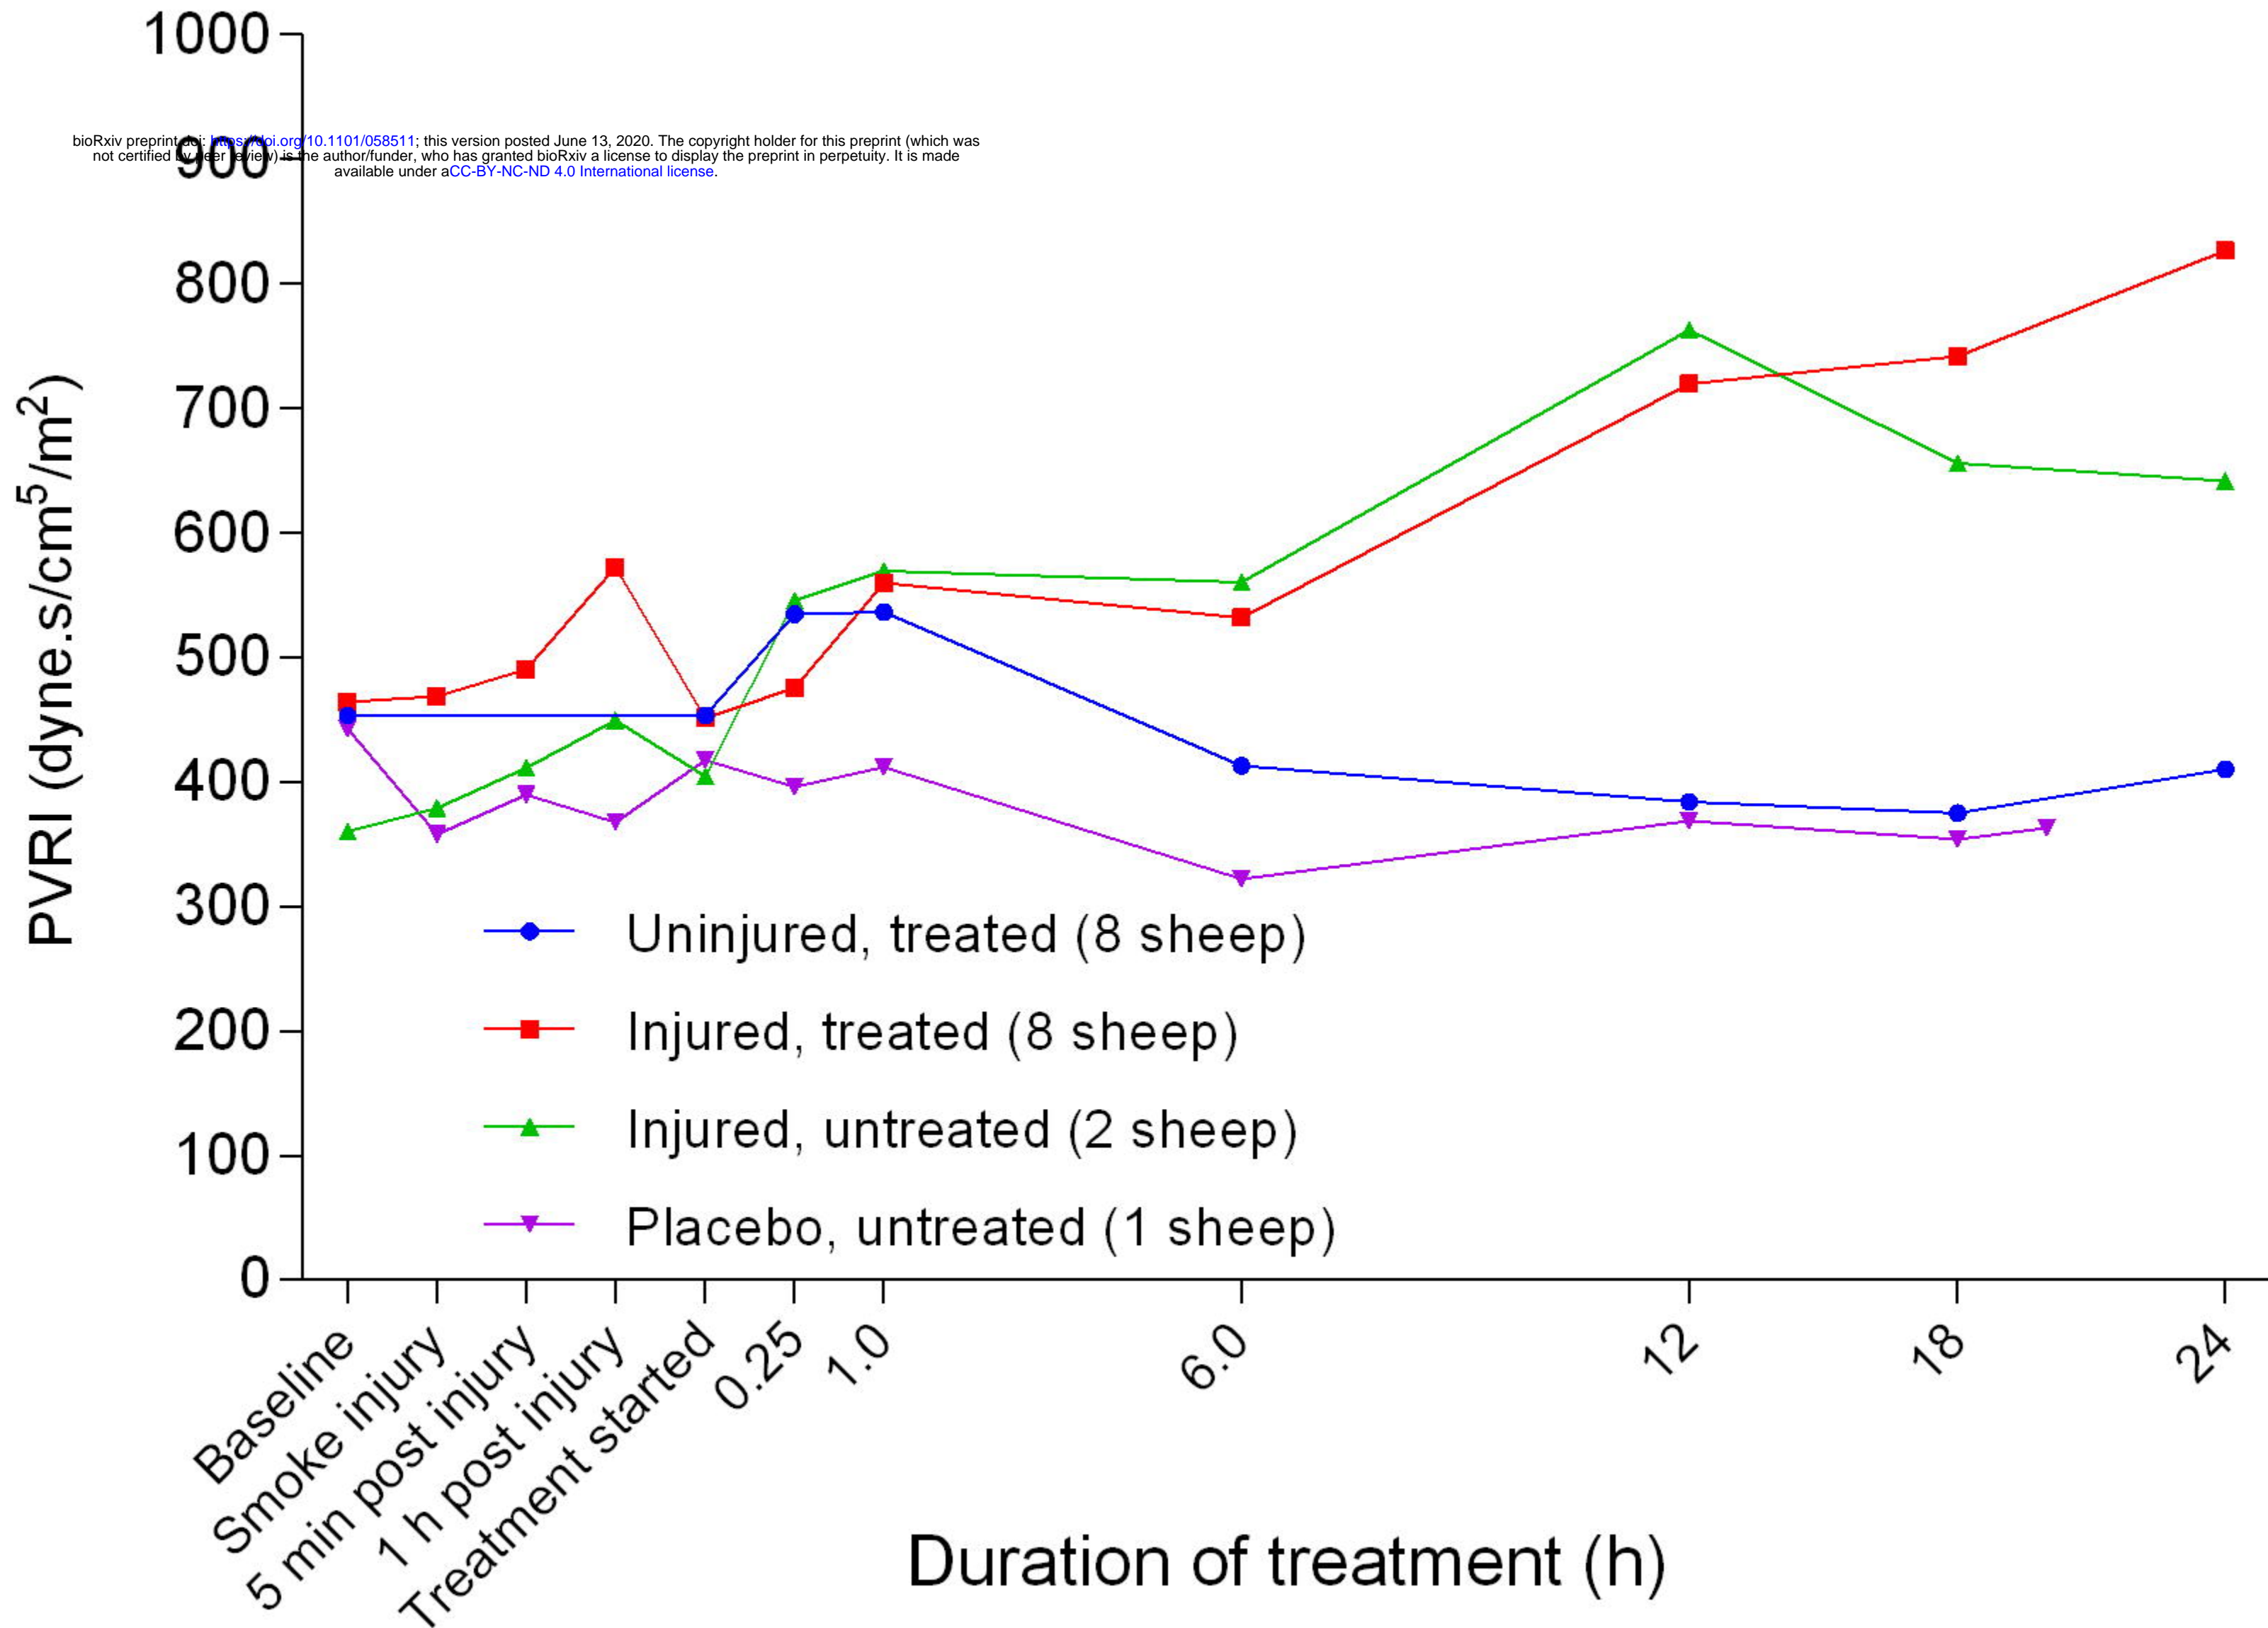



bioRxiv preprint doi: <https://doi.org/10.1101/058511>; this version posted June 13, 2020. The copyright holder for this preprint (which was not certified by peer review) is the author/funder, who has granted bioRxiv a license to display the preprint in perpetuity. It is made available under aCC-BY-NC-ND 4.0 International license.

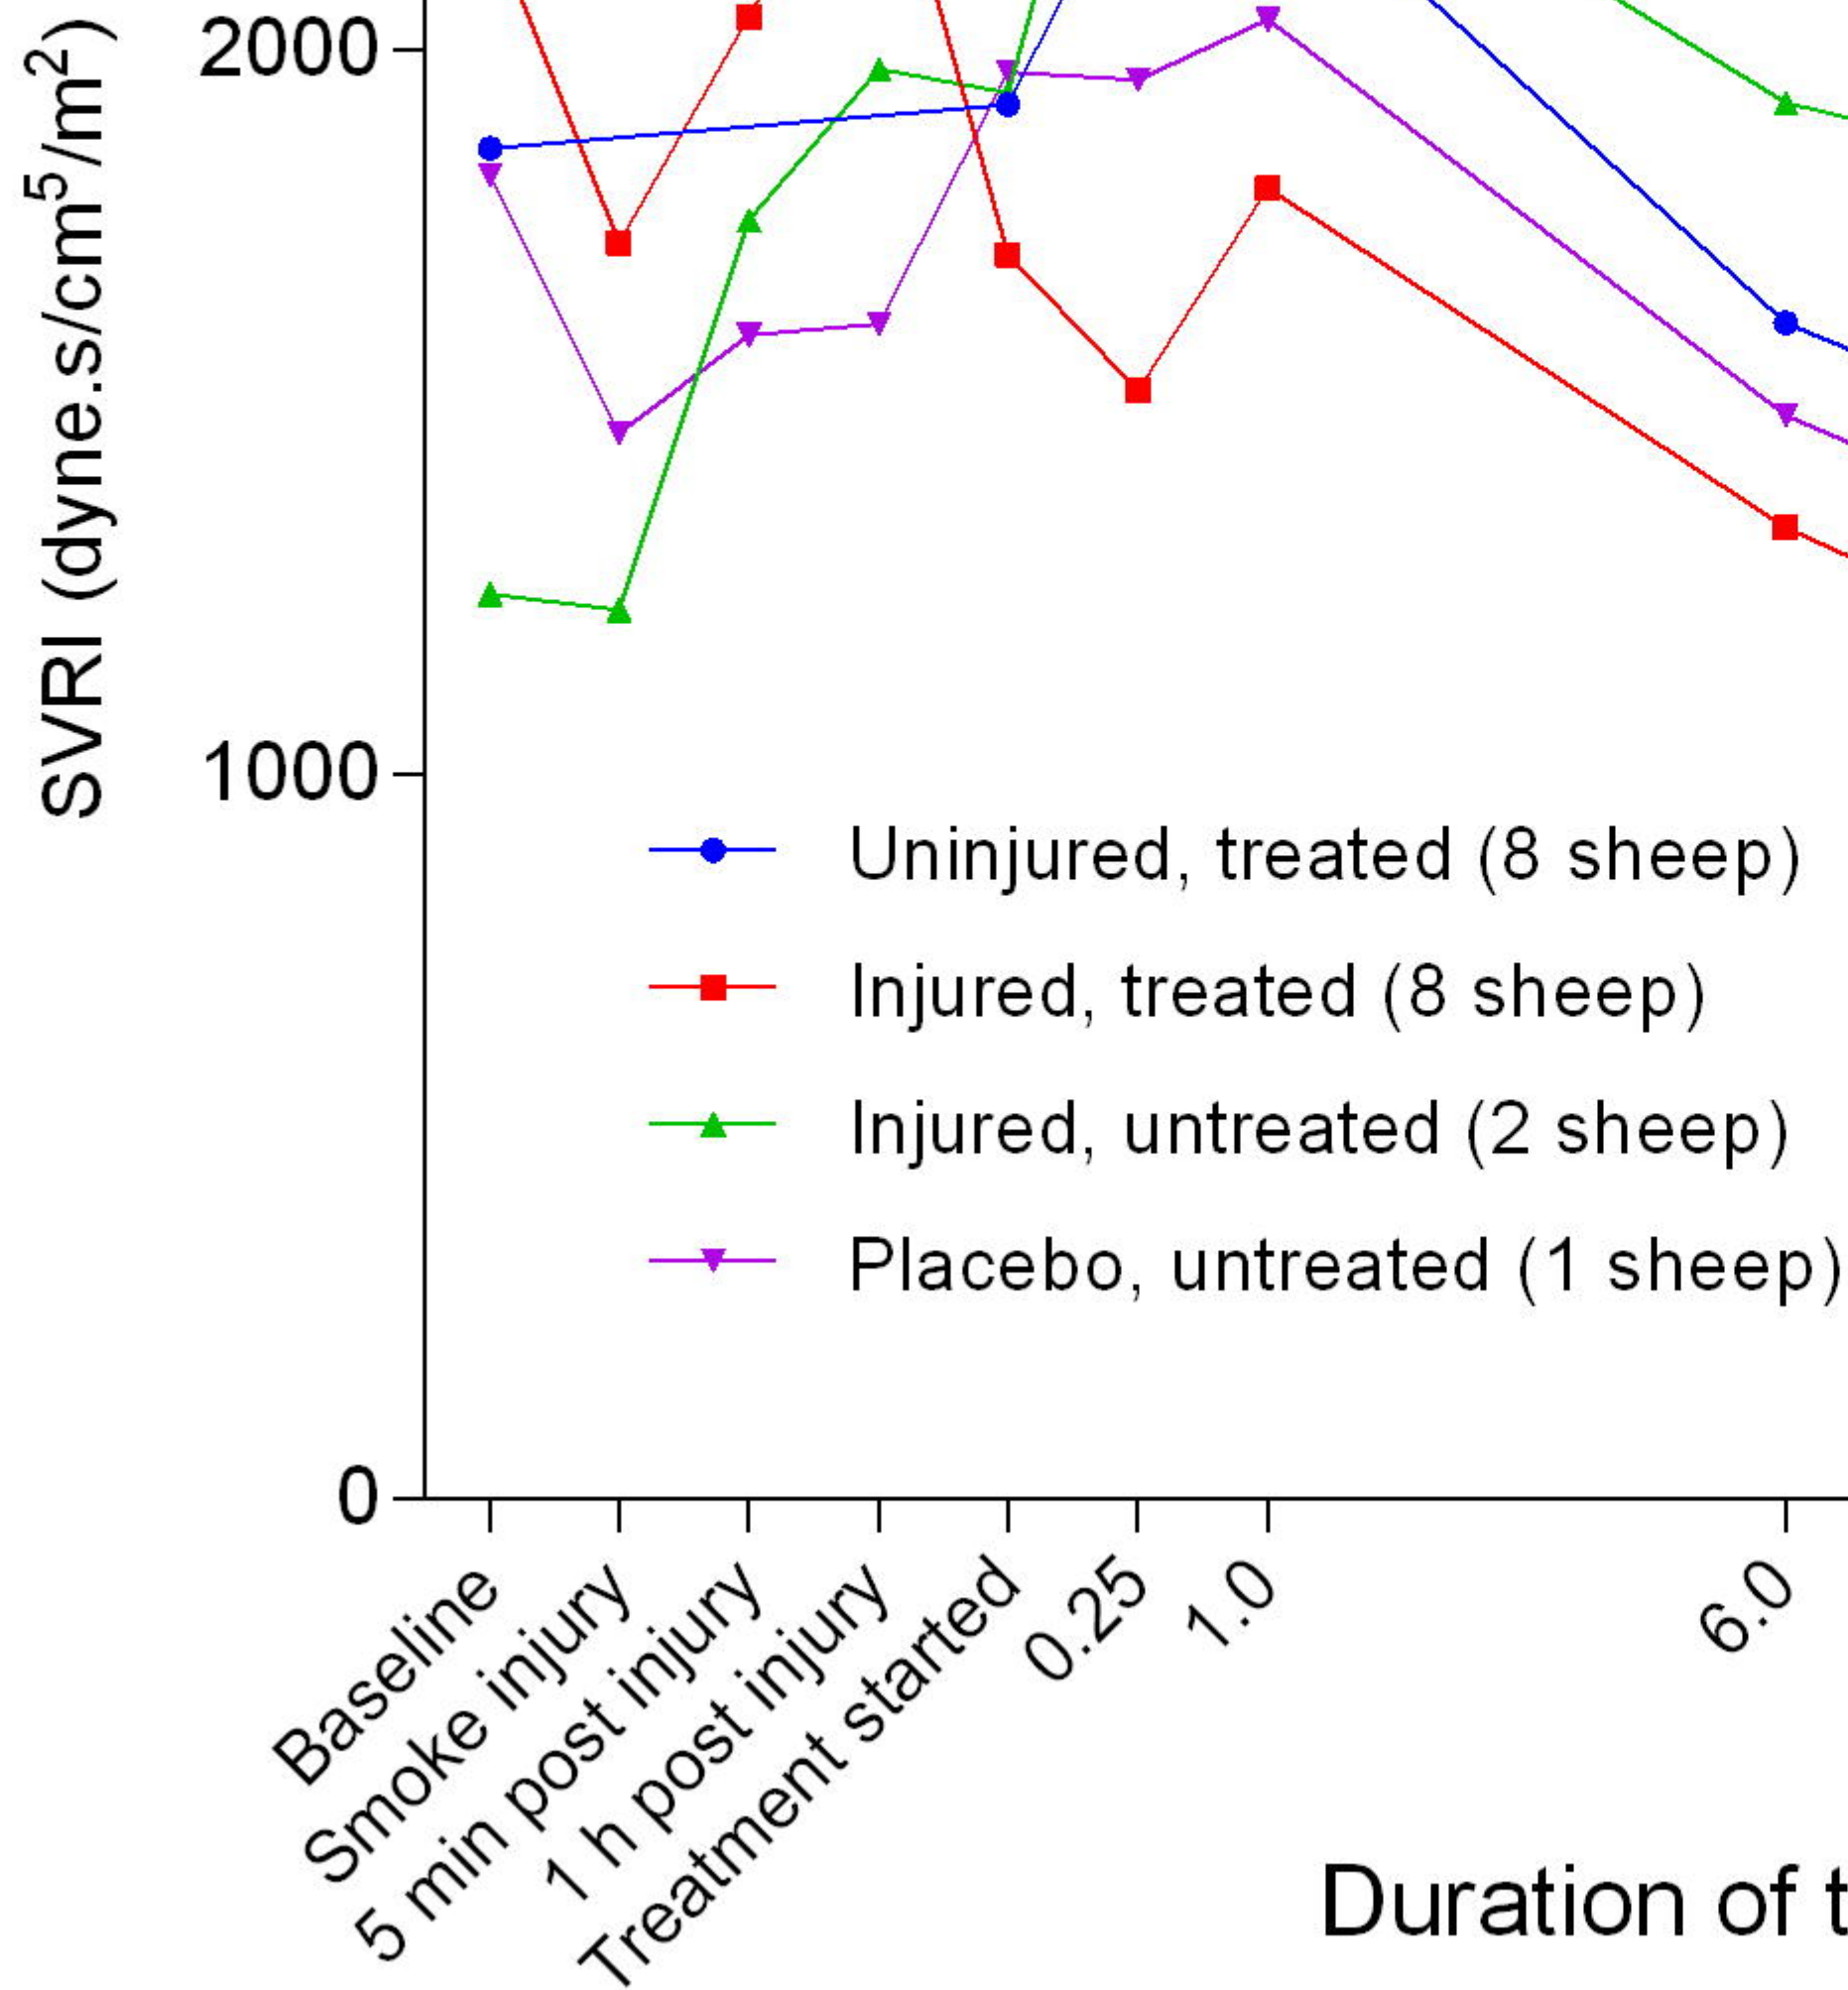

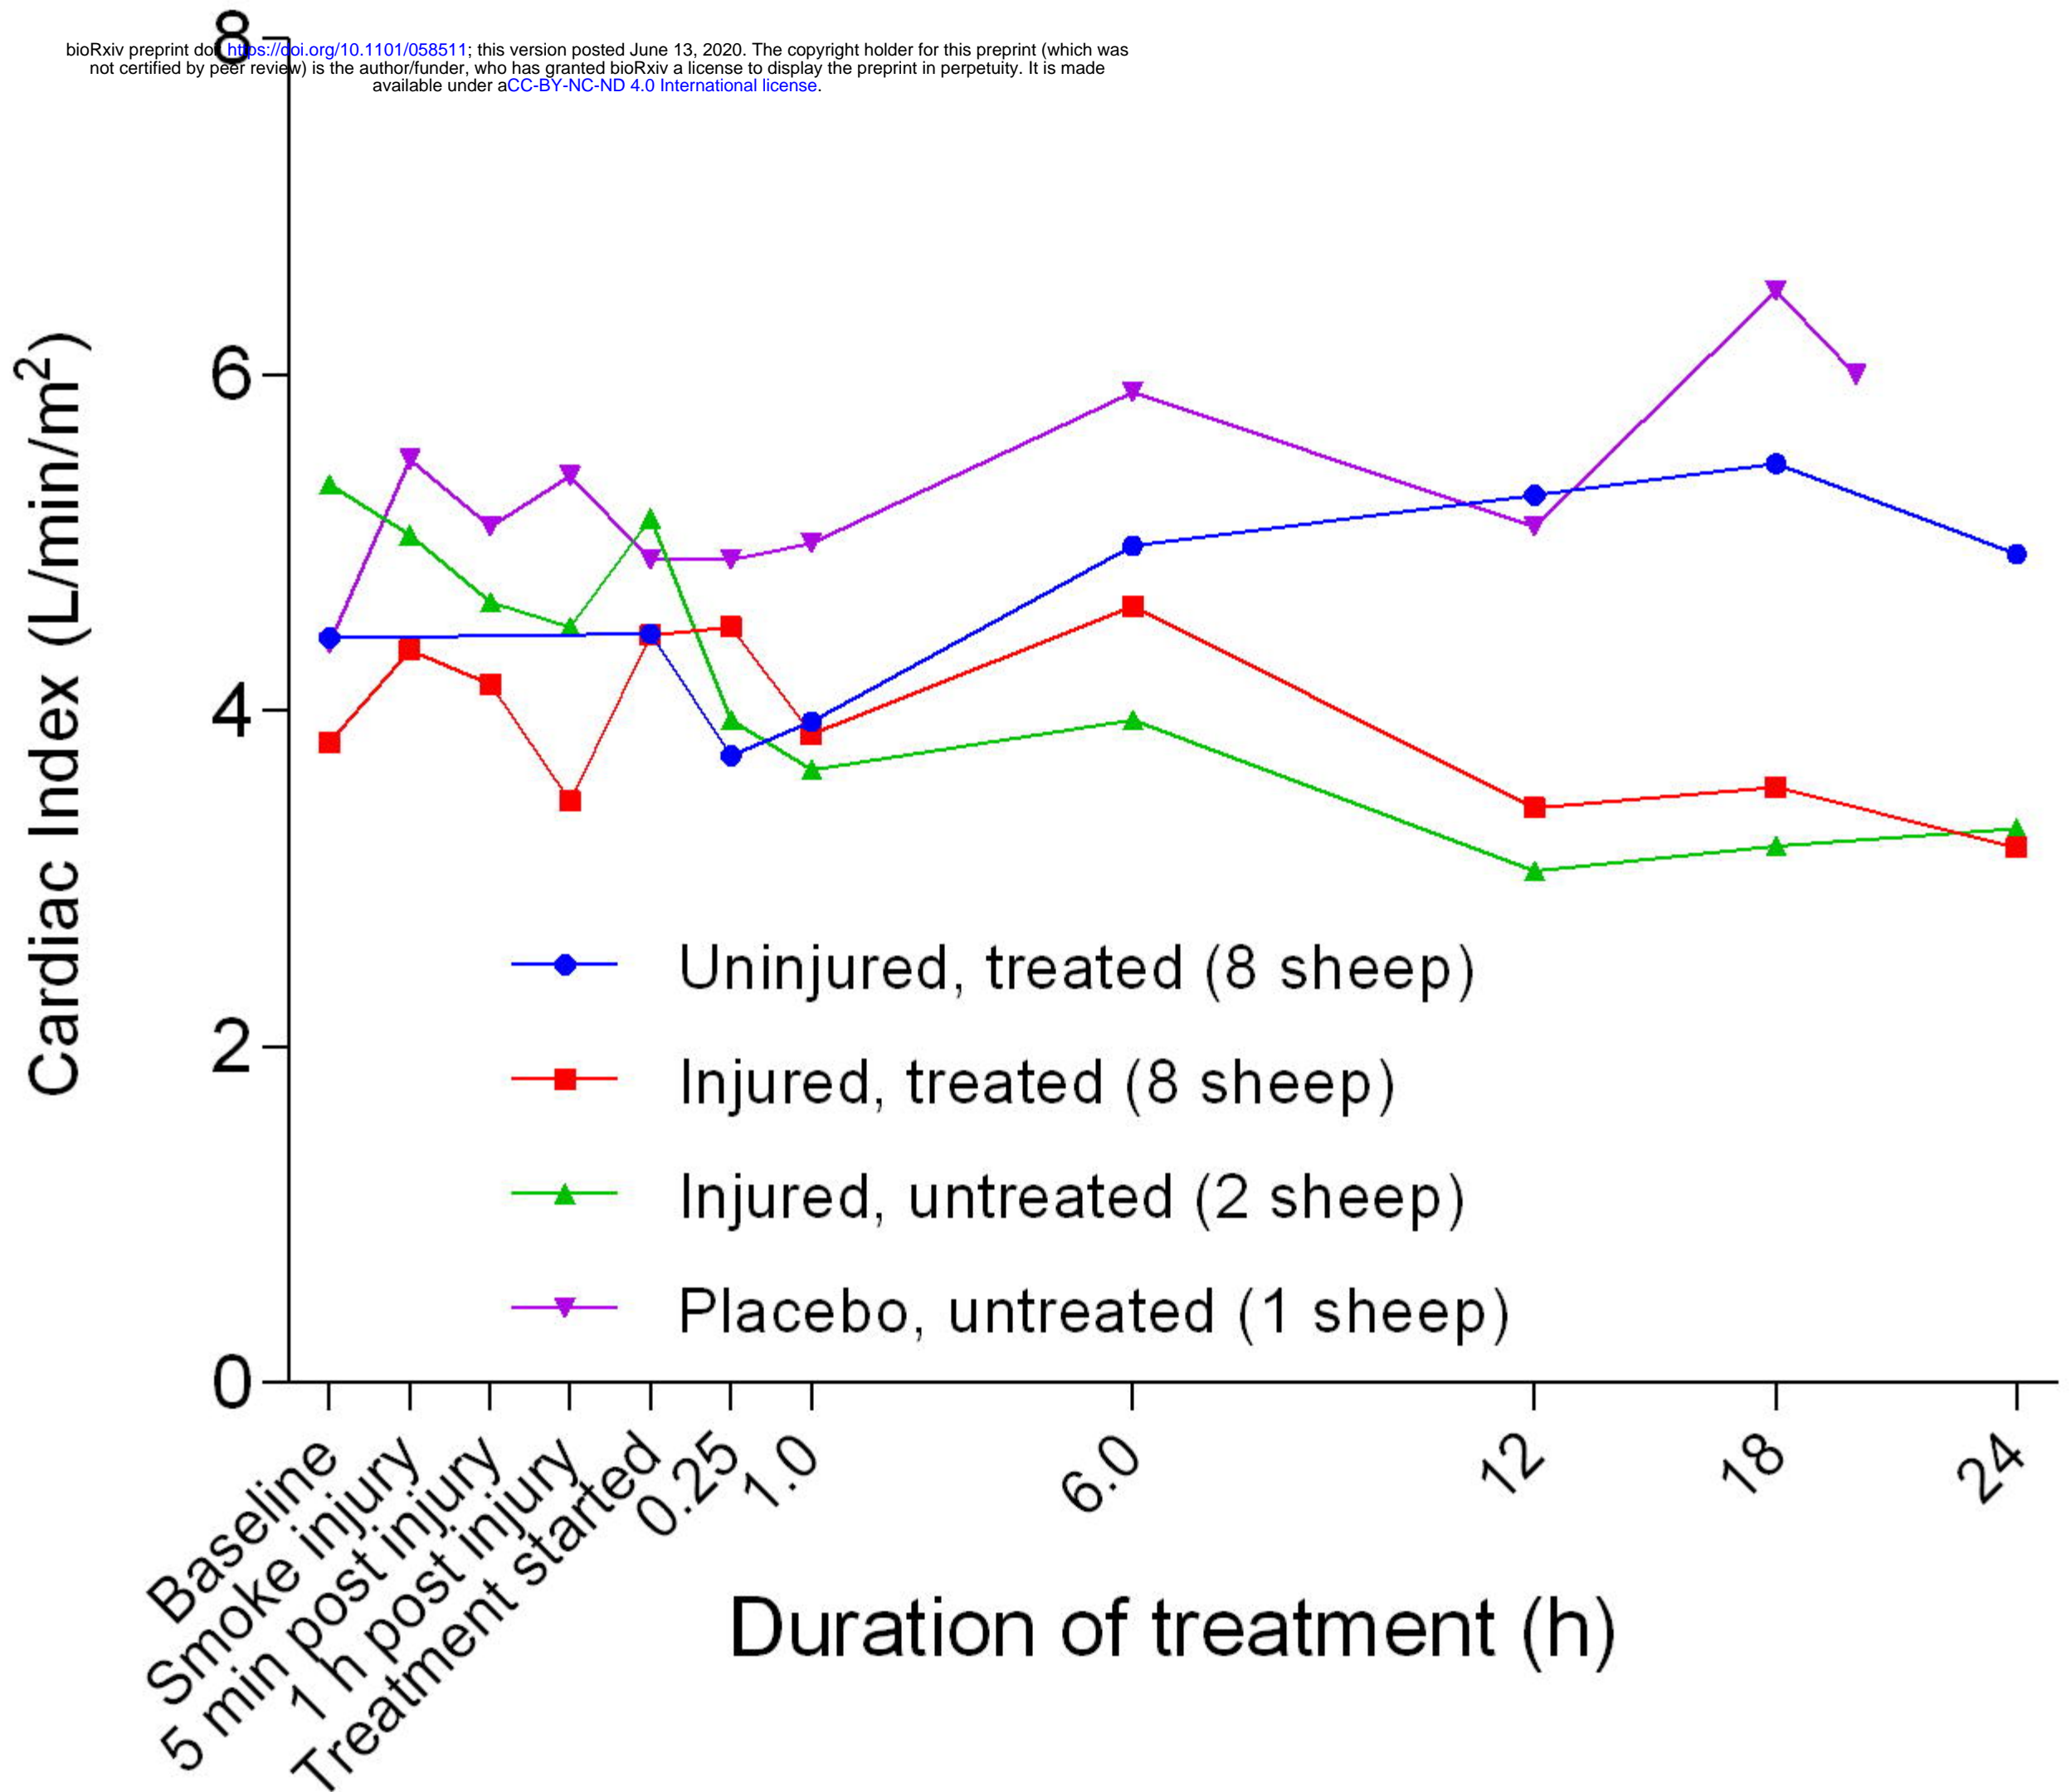

SVI (mL/m<sup>2</sup>/beat)

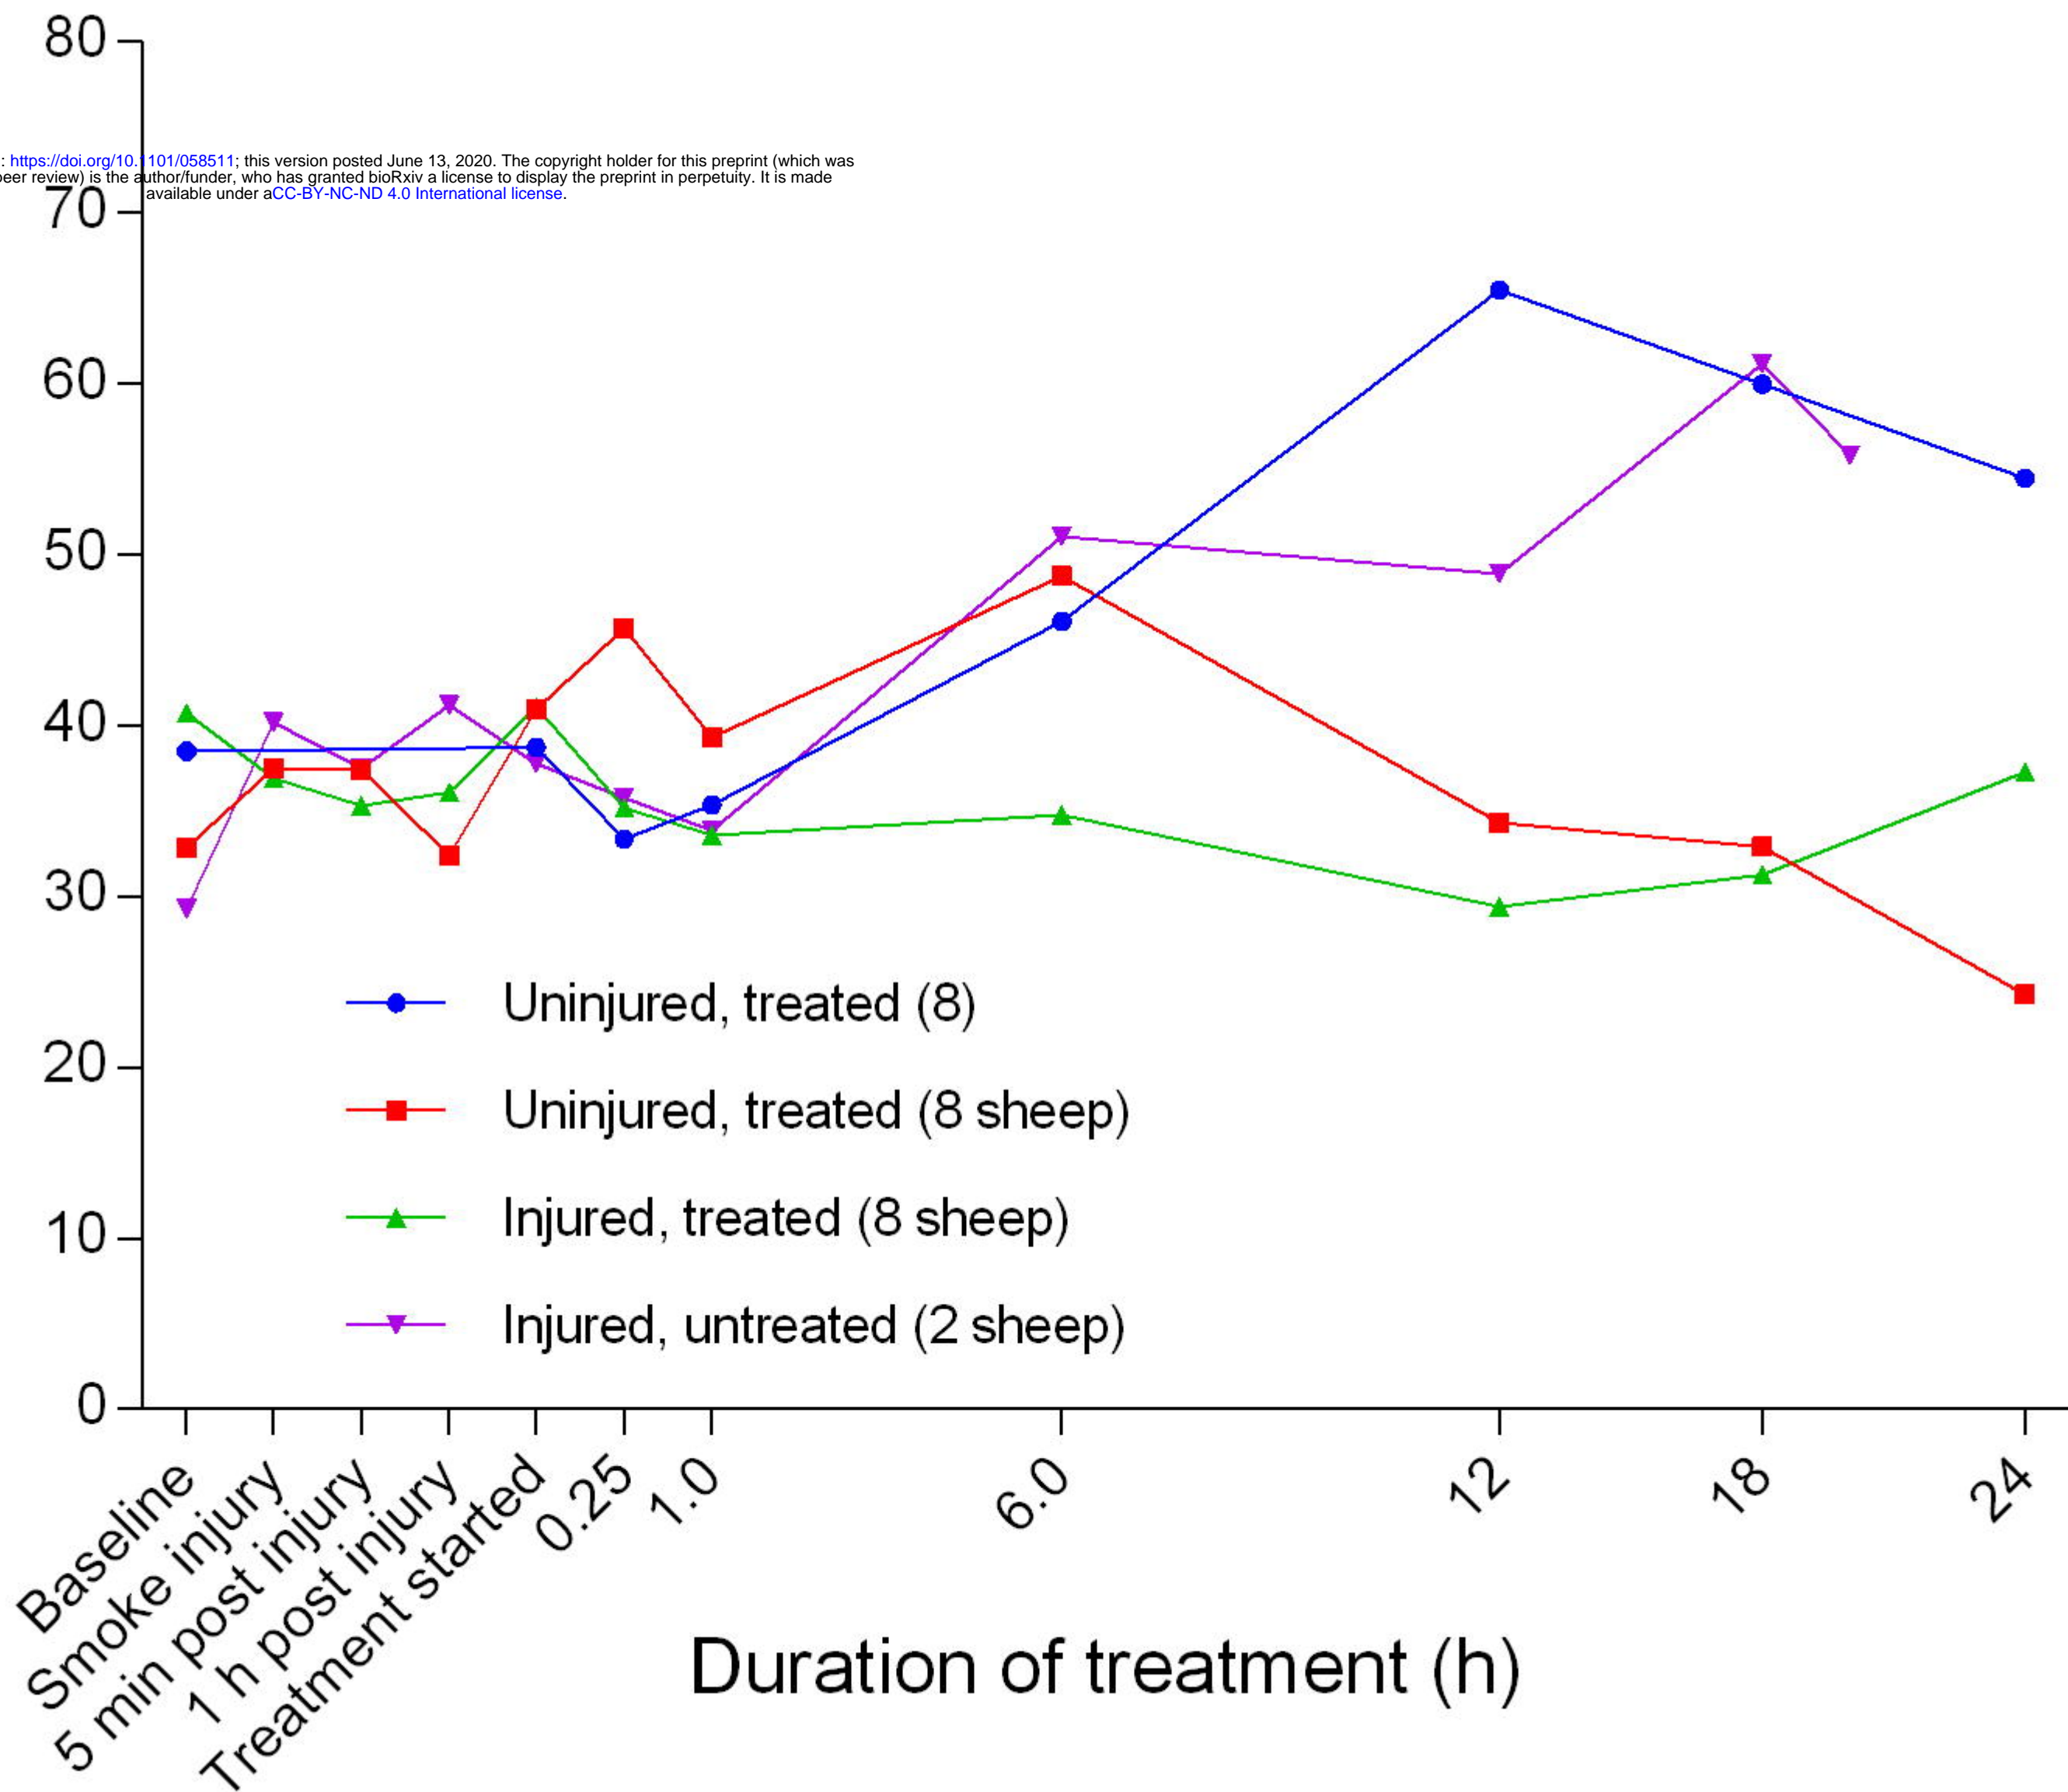



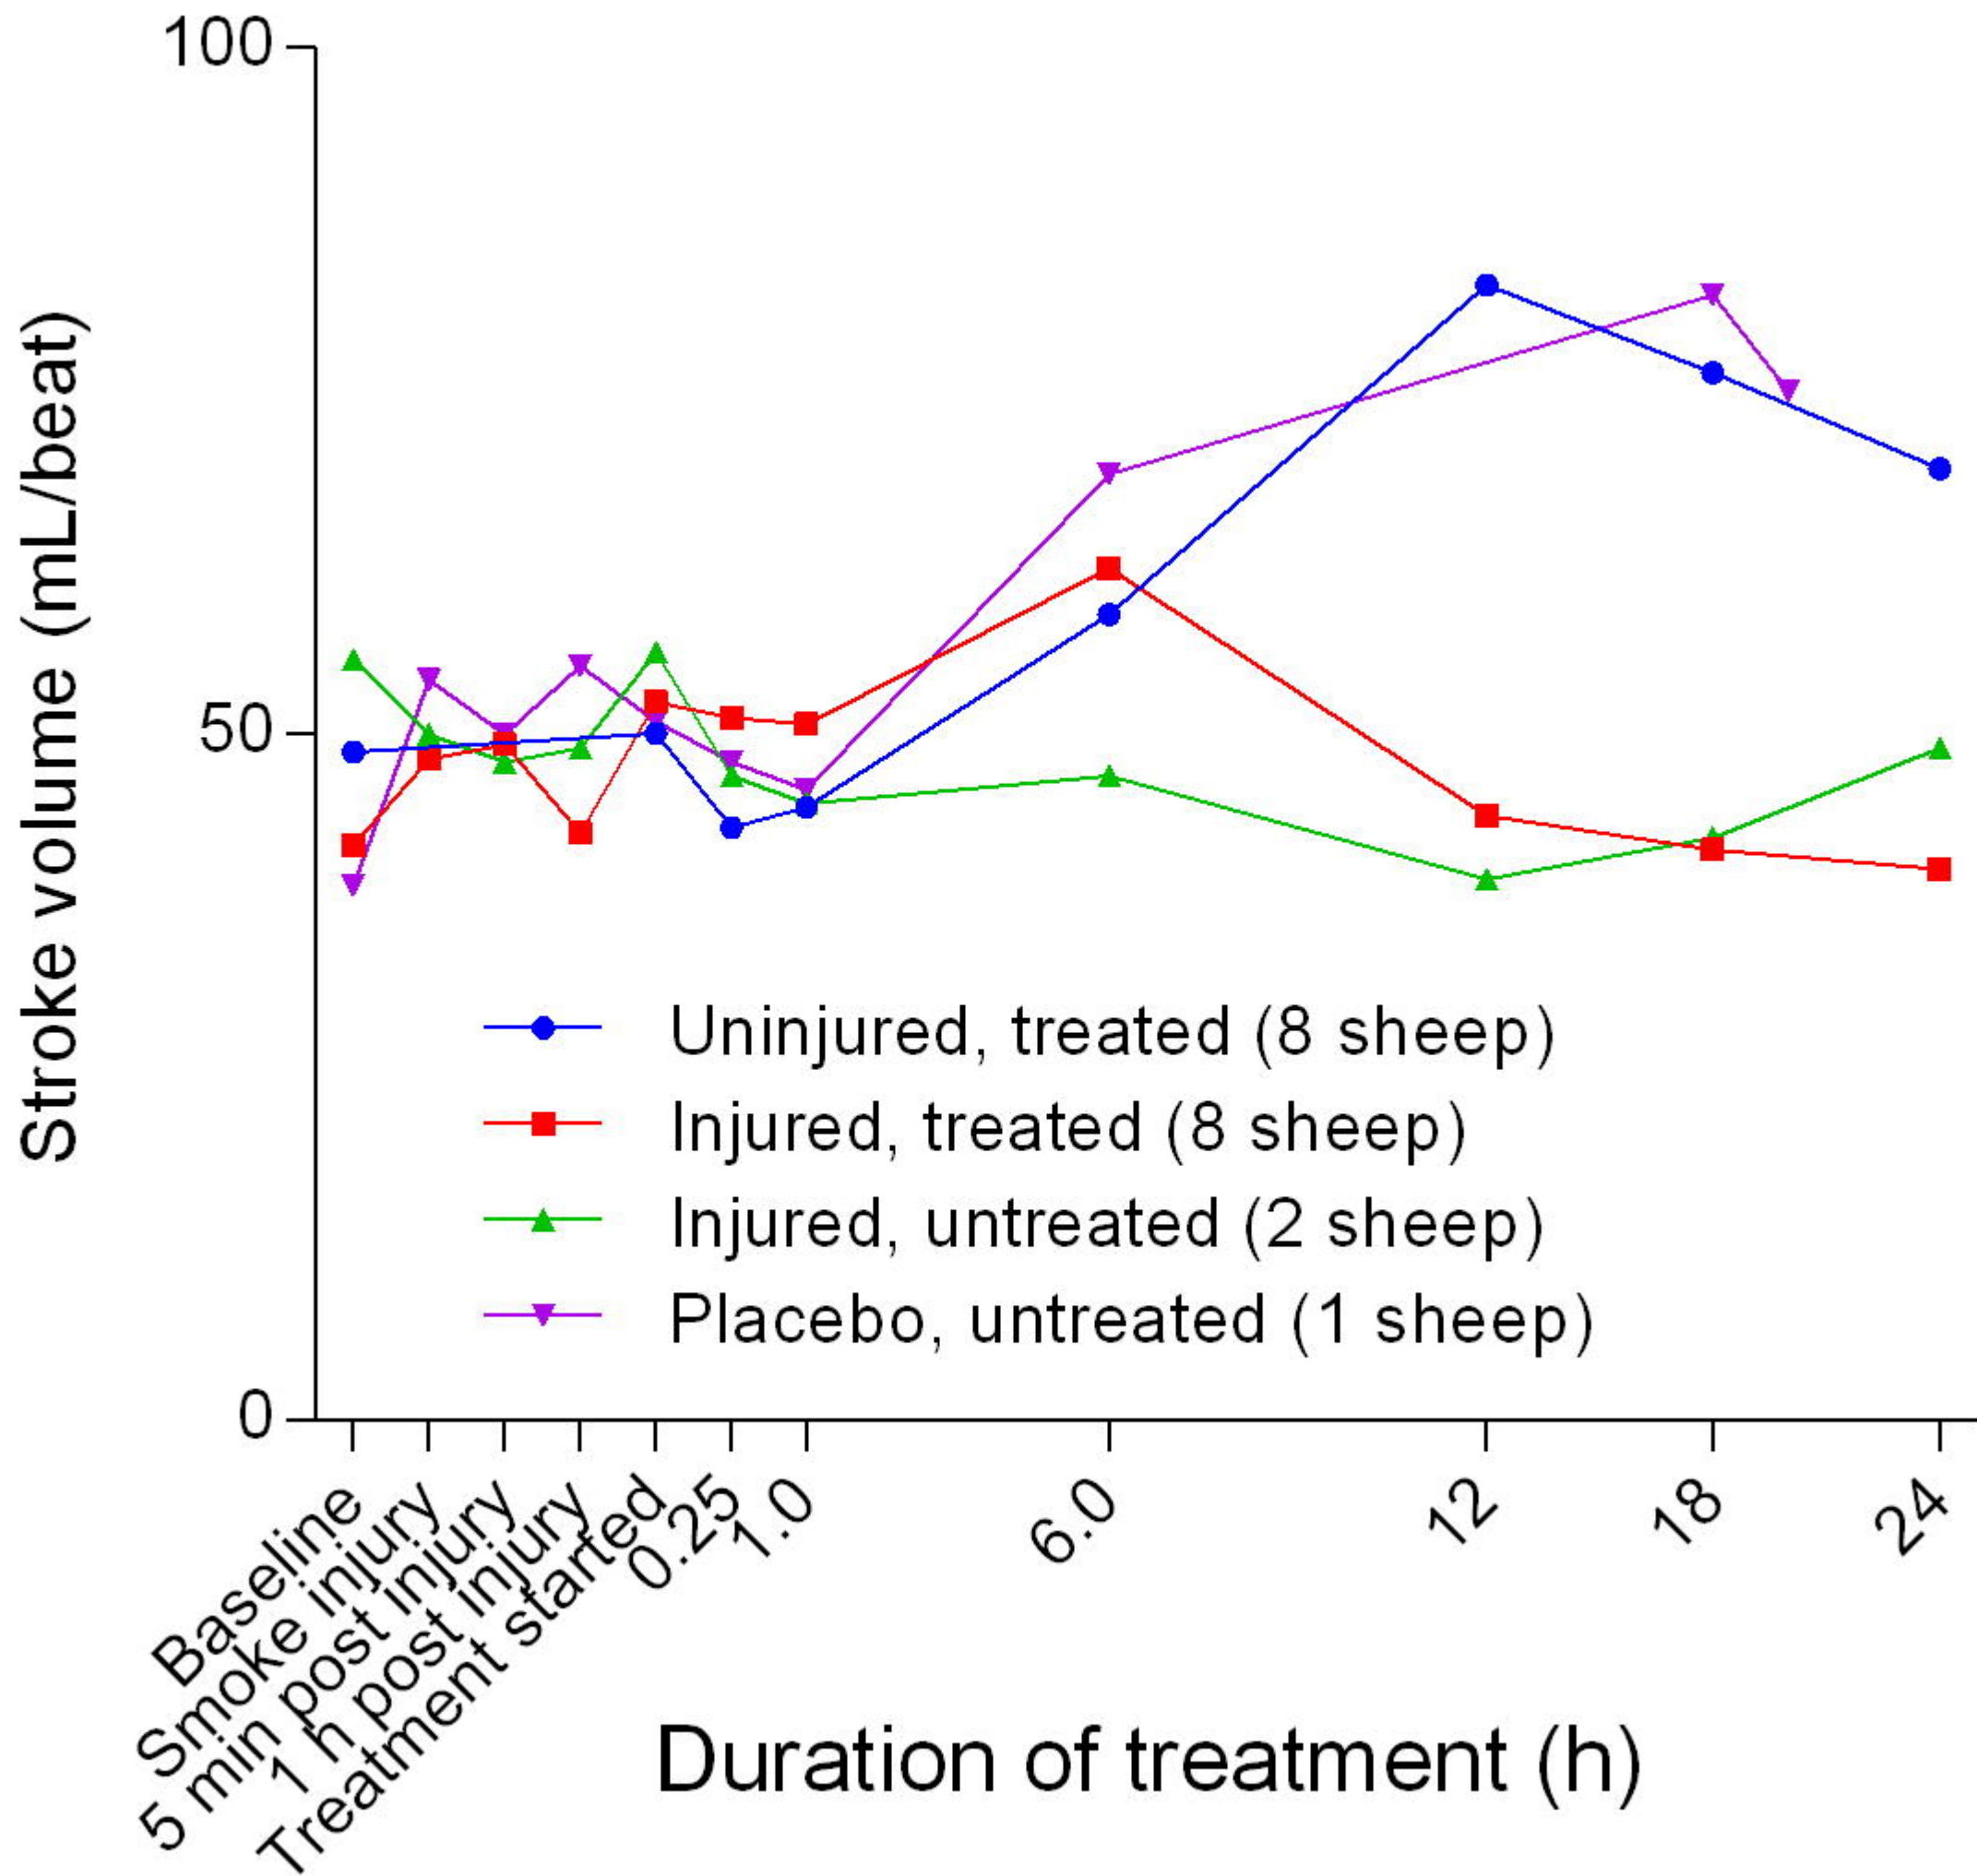

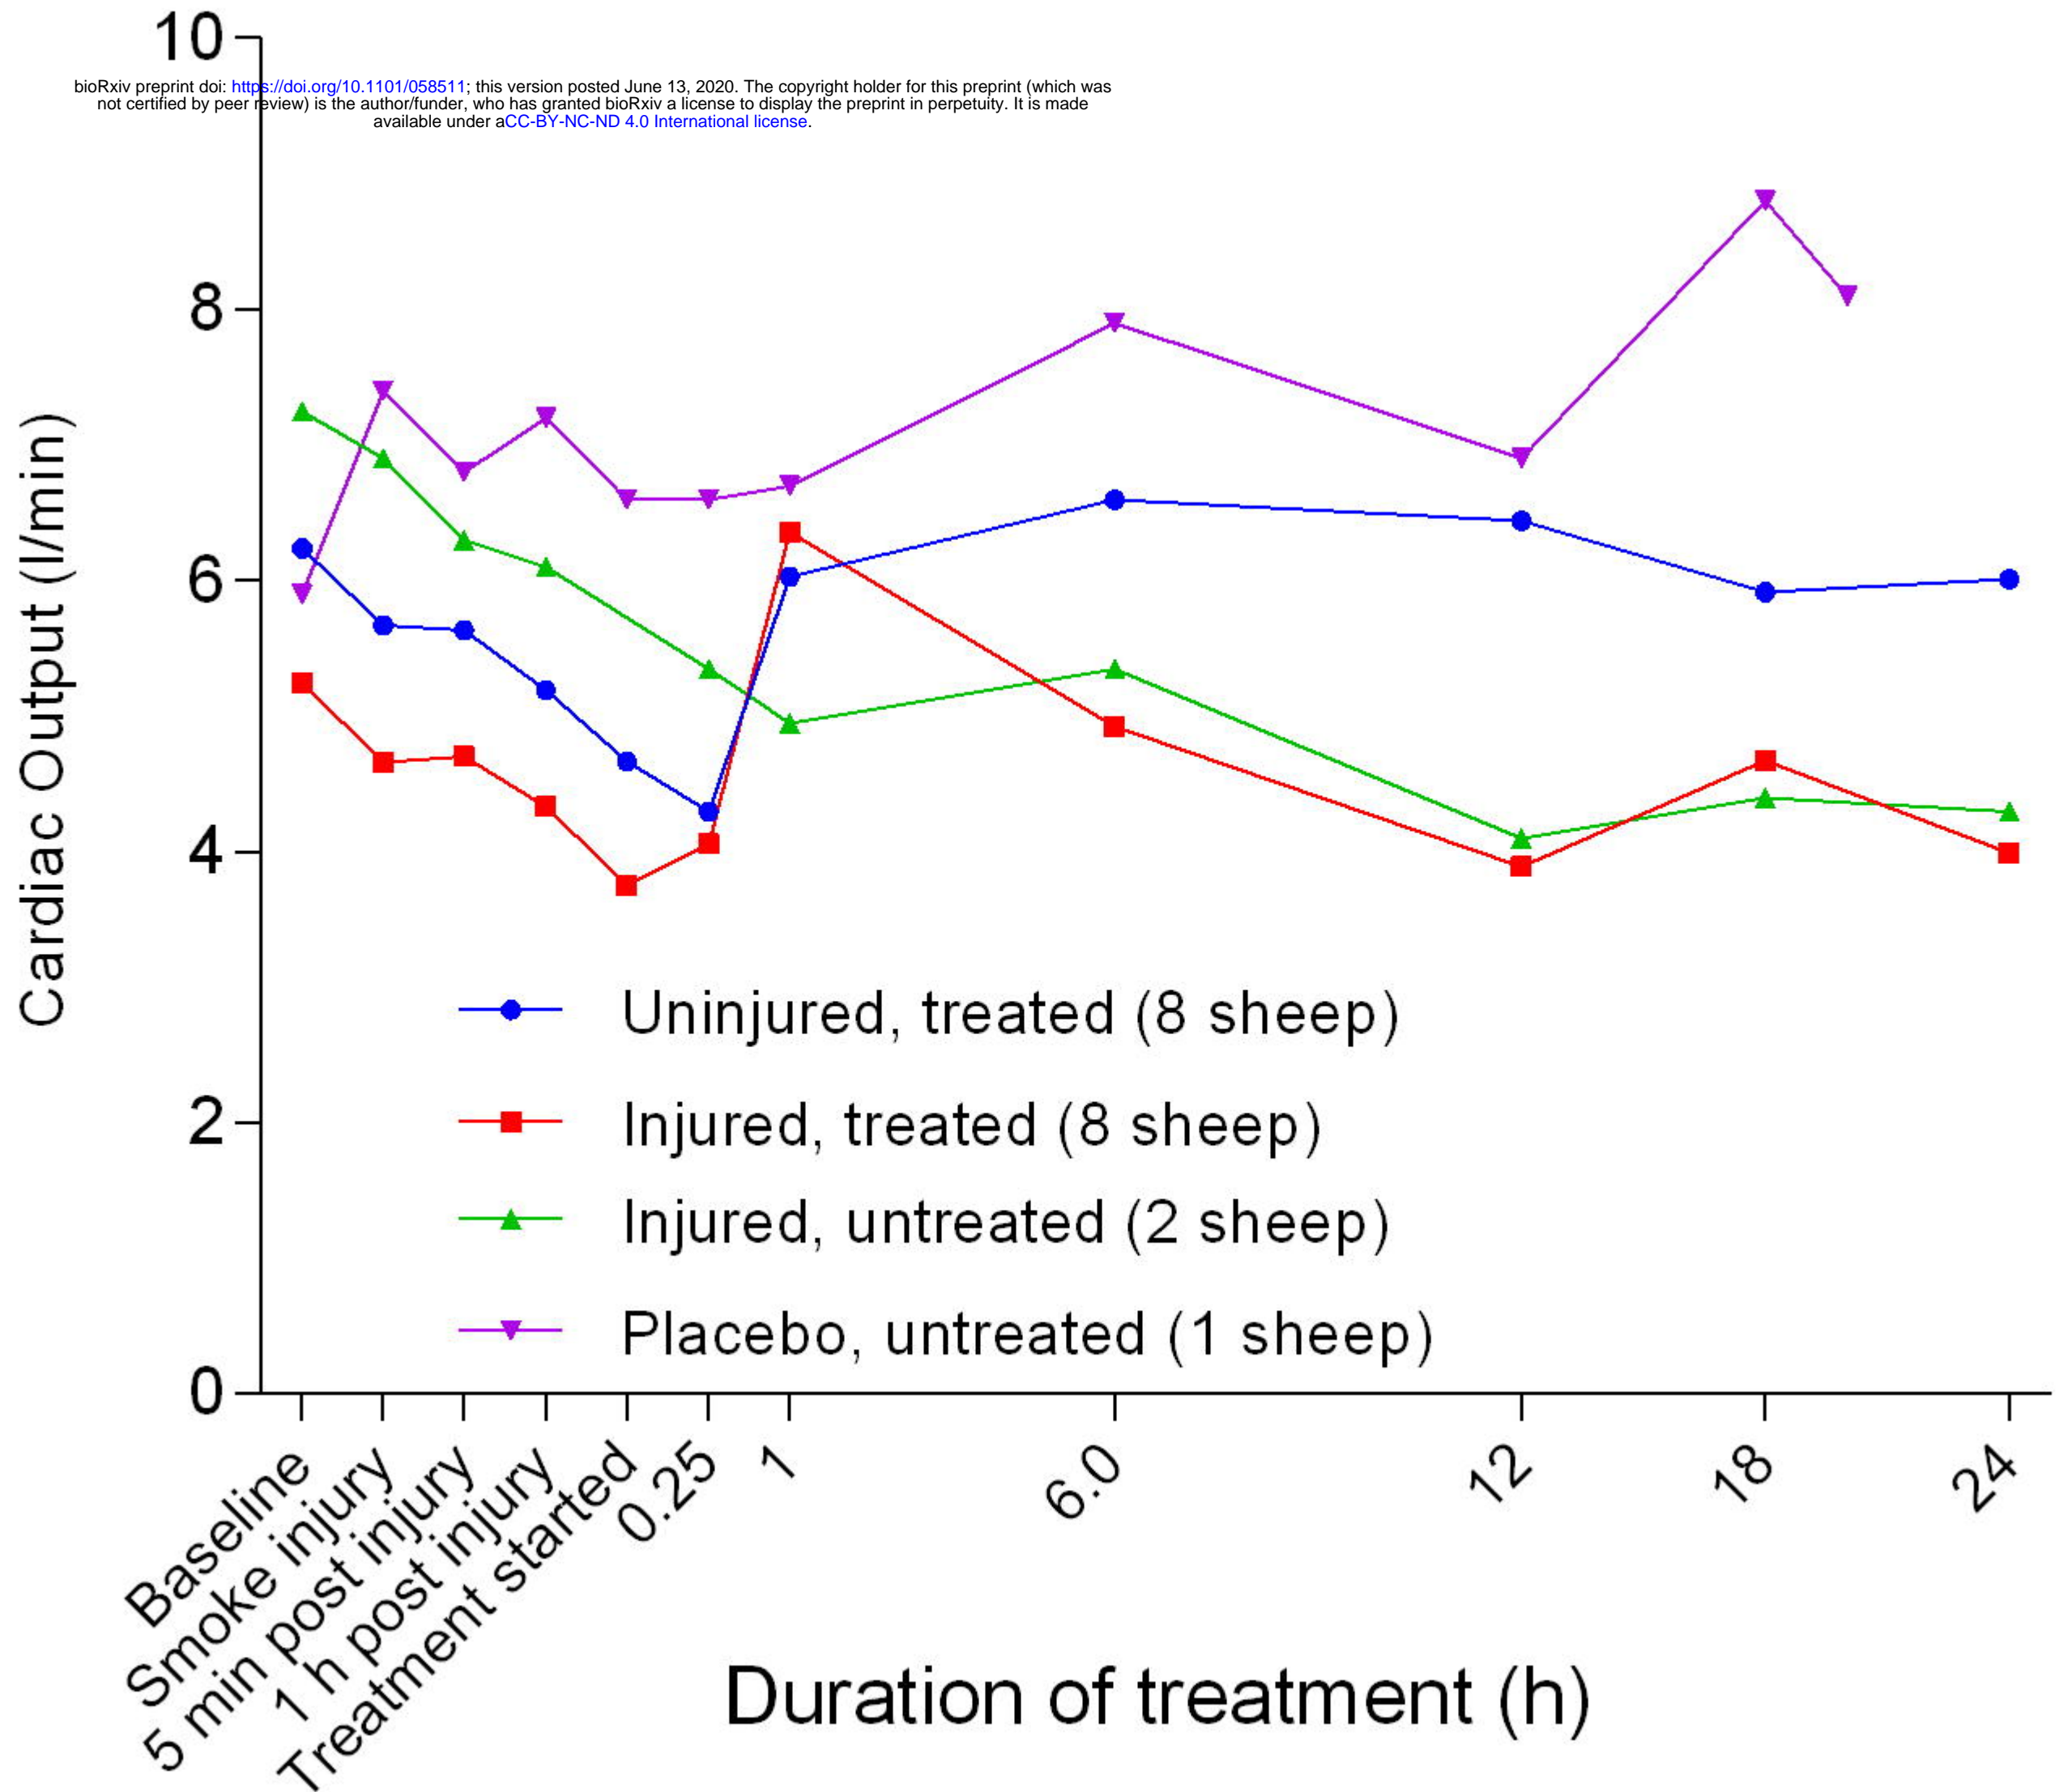



SvO<sub>2</sub> saturation (%)

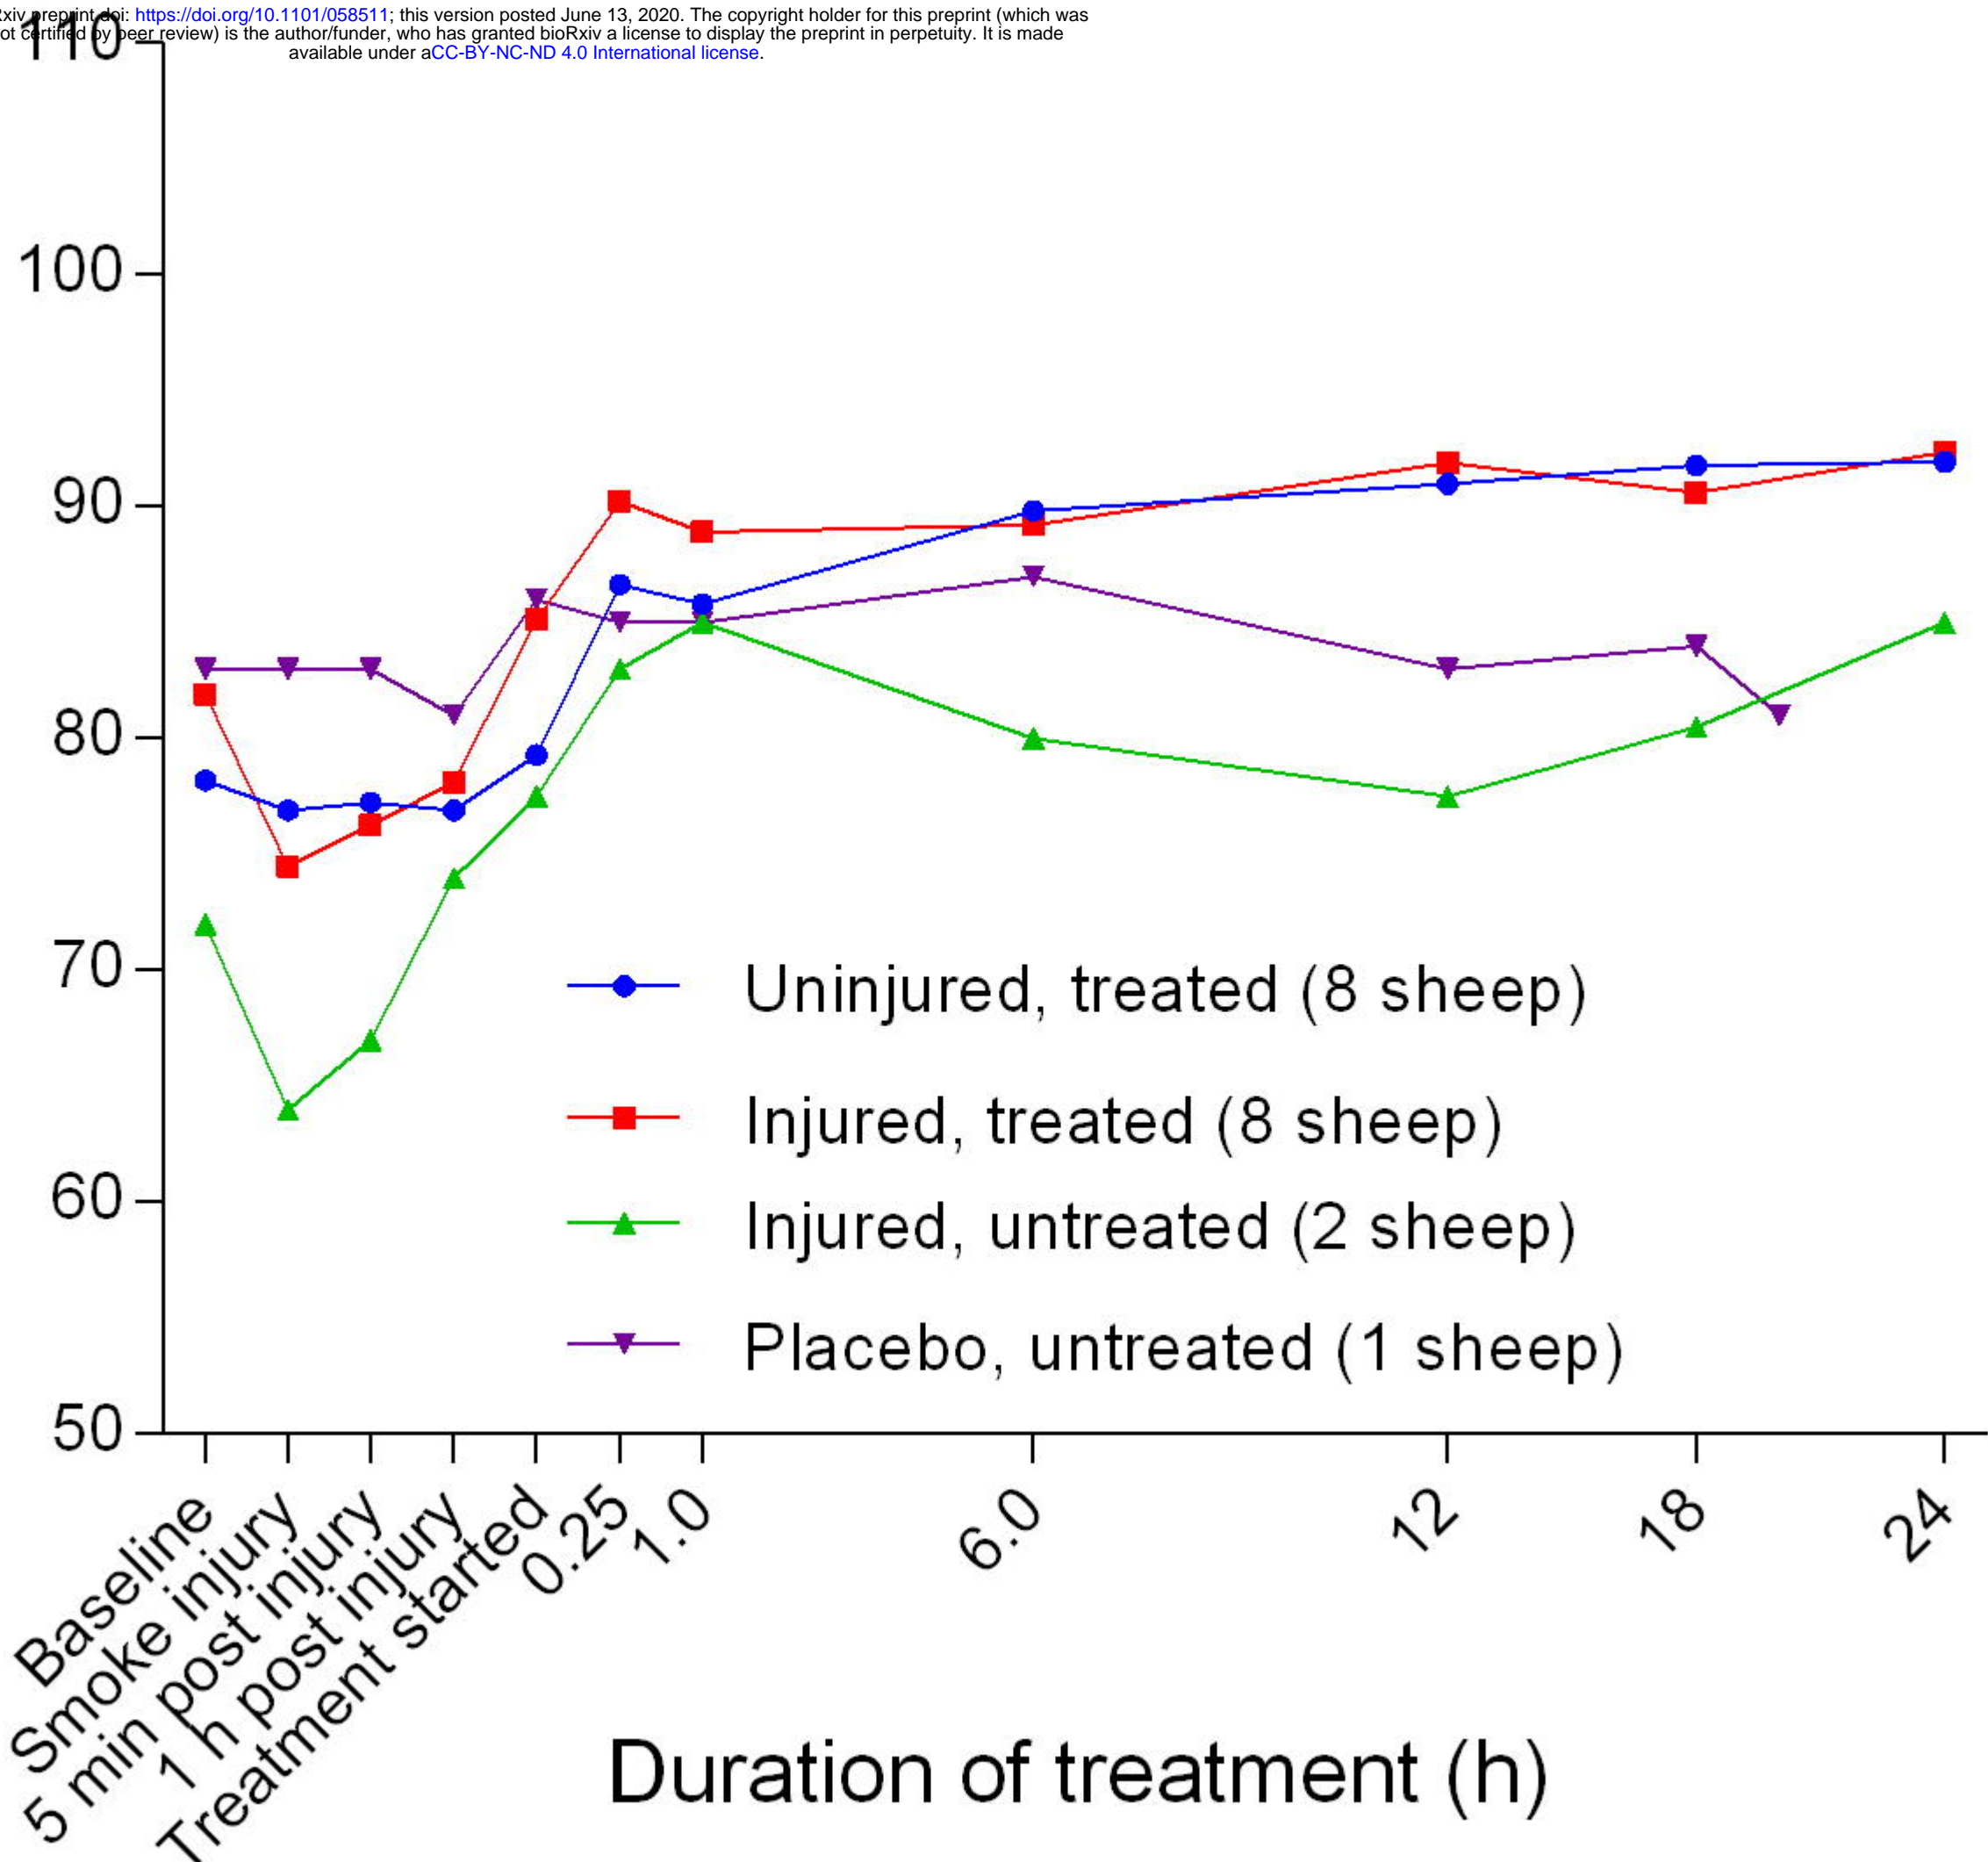

Duration of treatment (h)

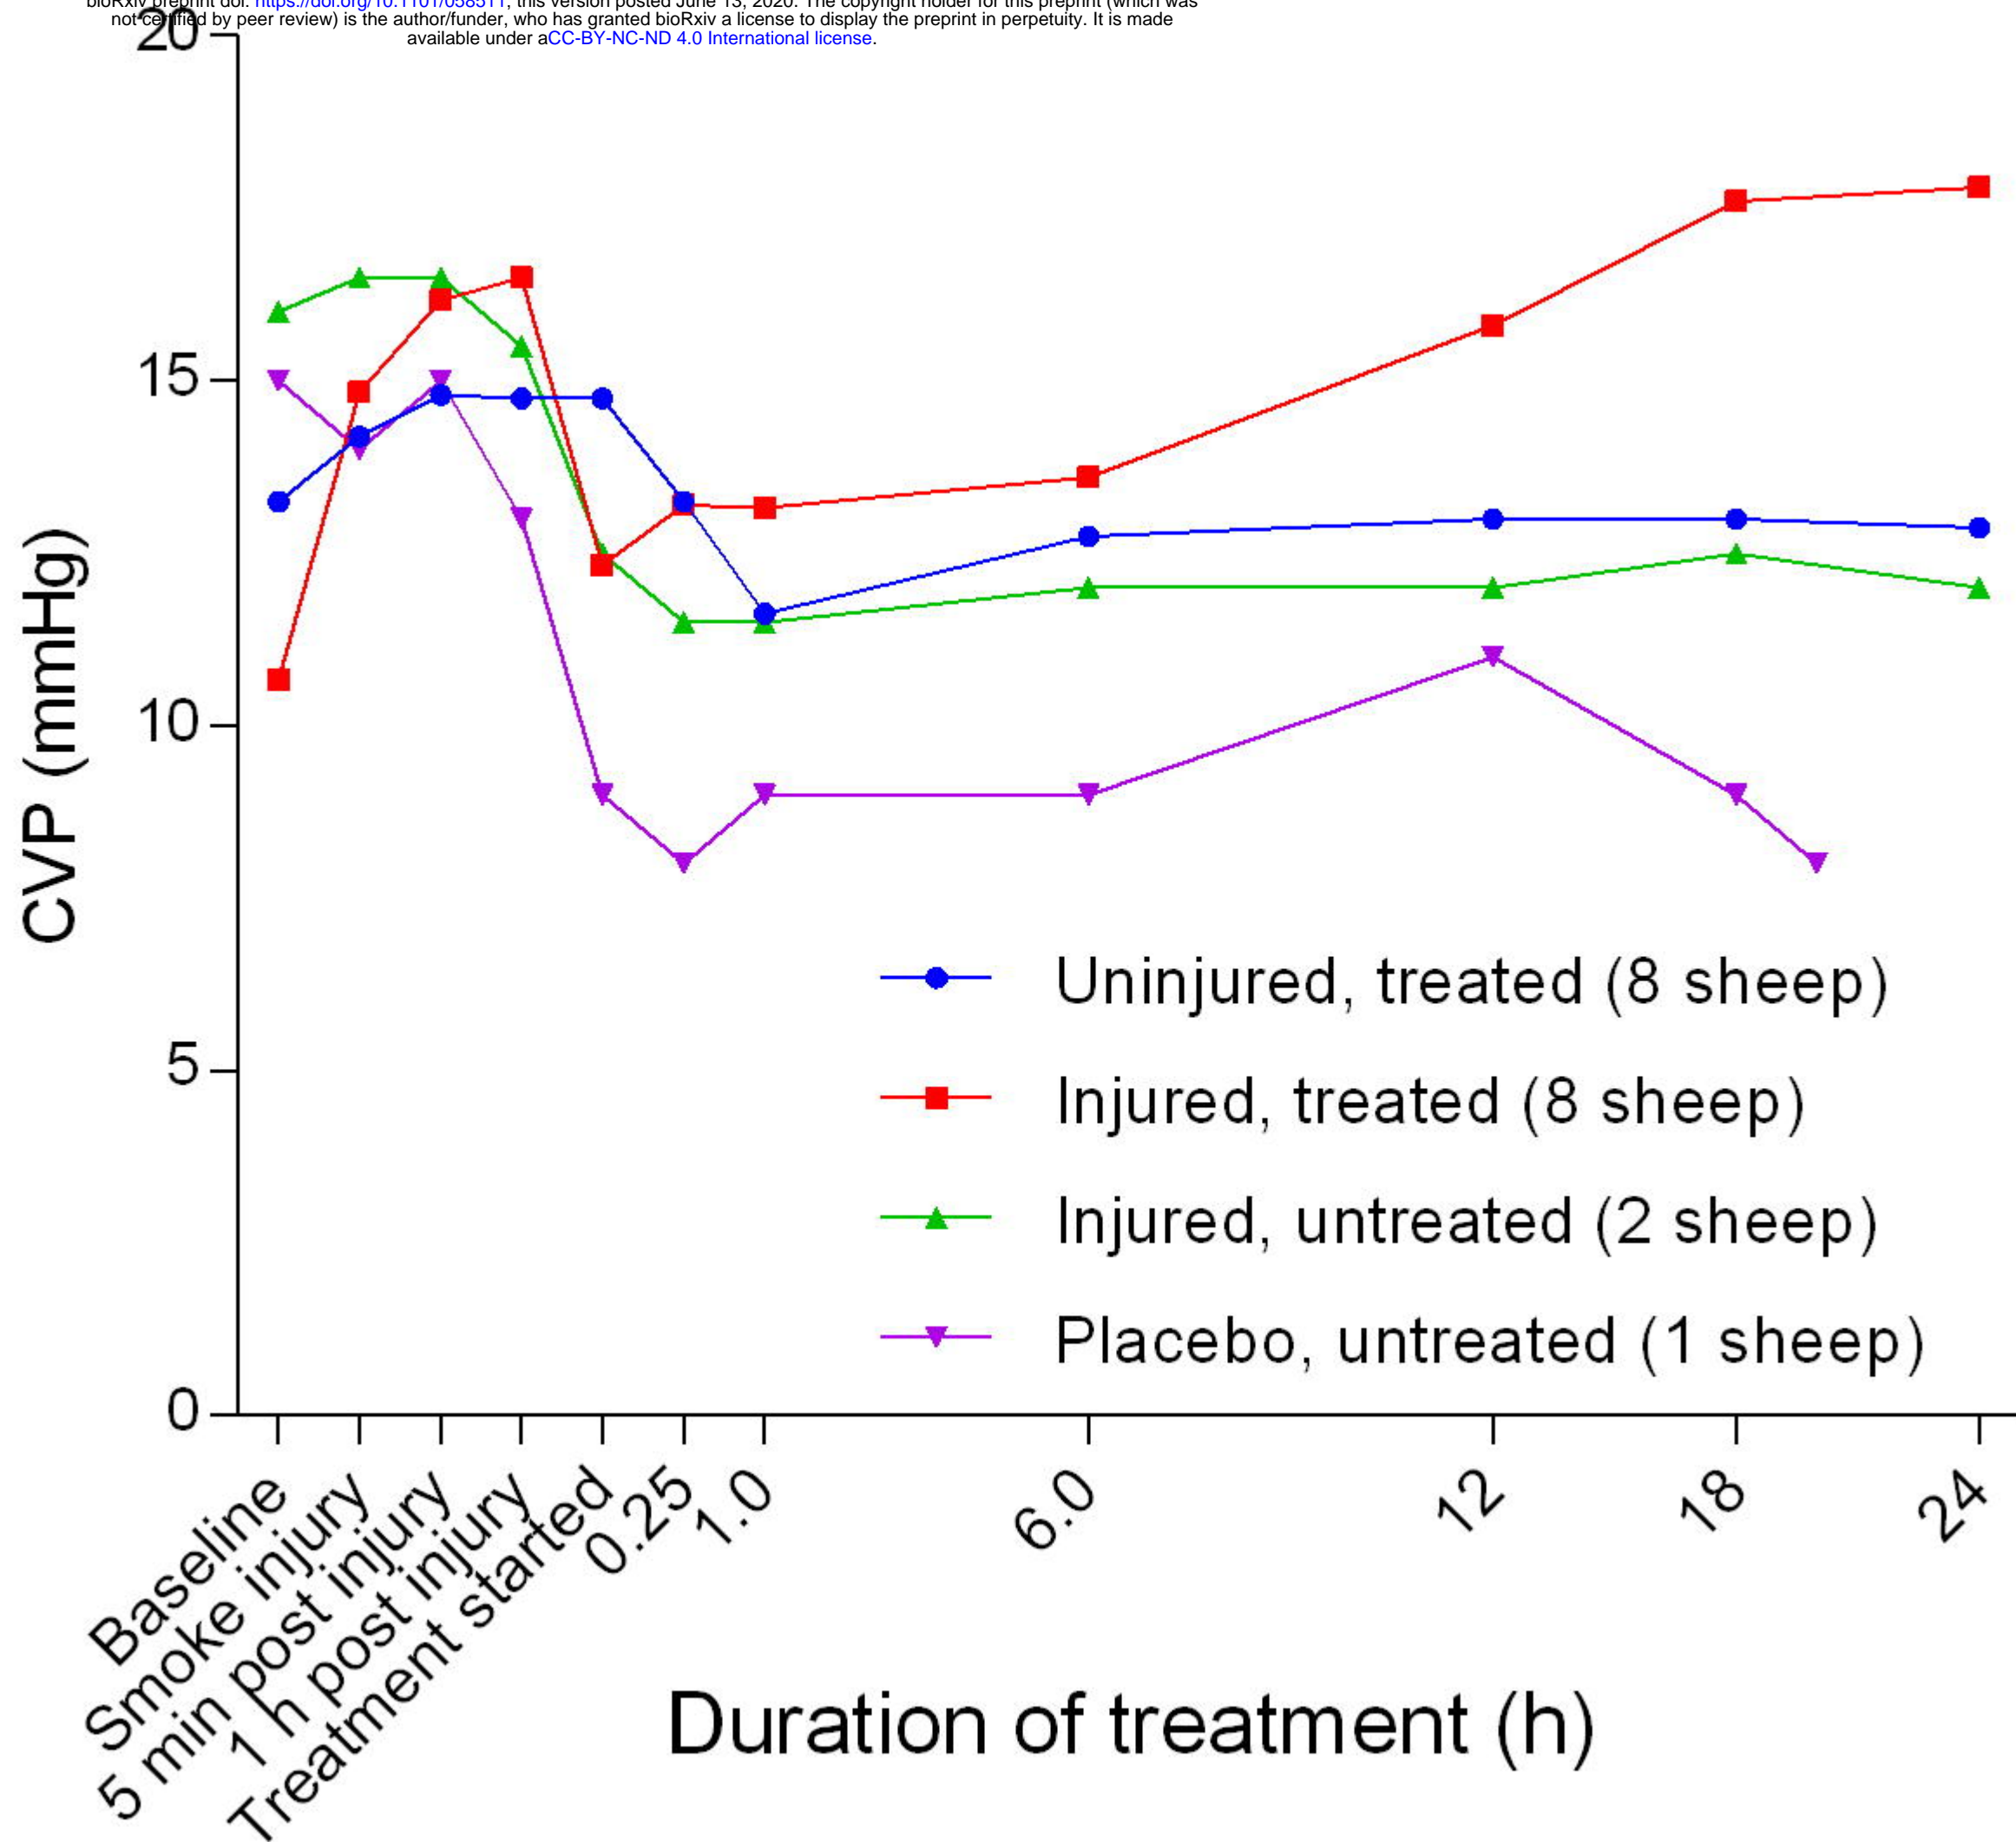

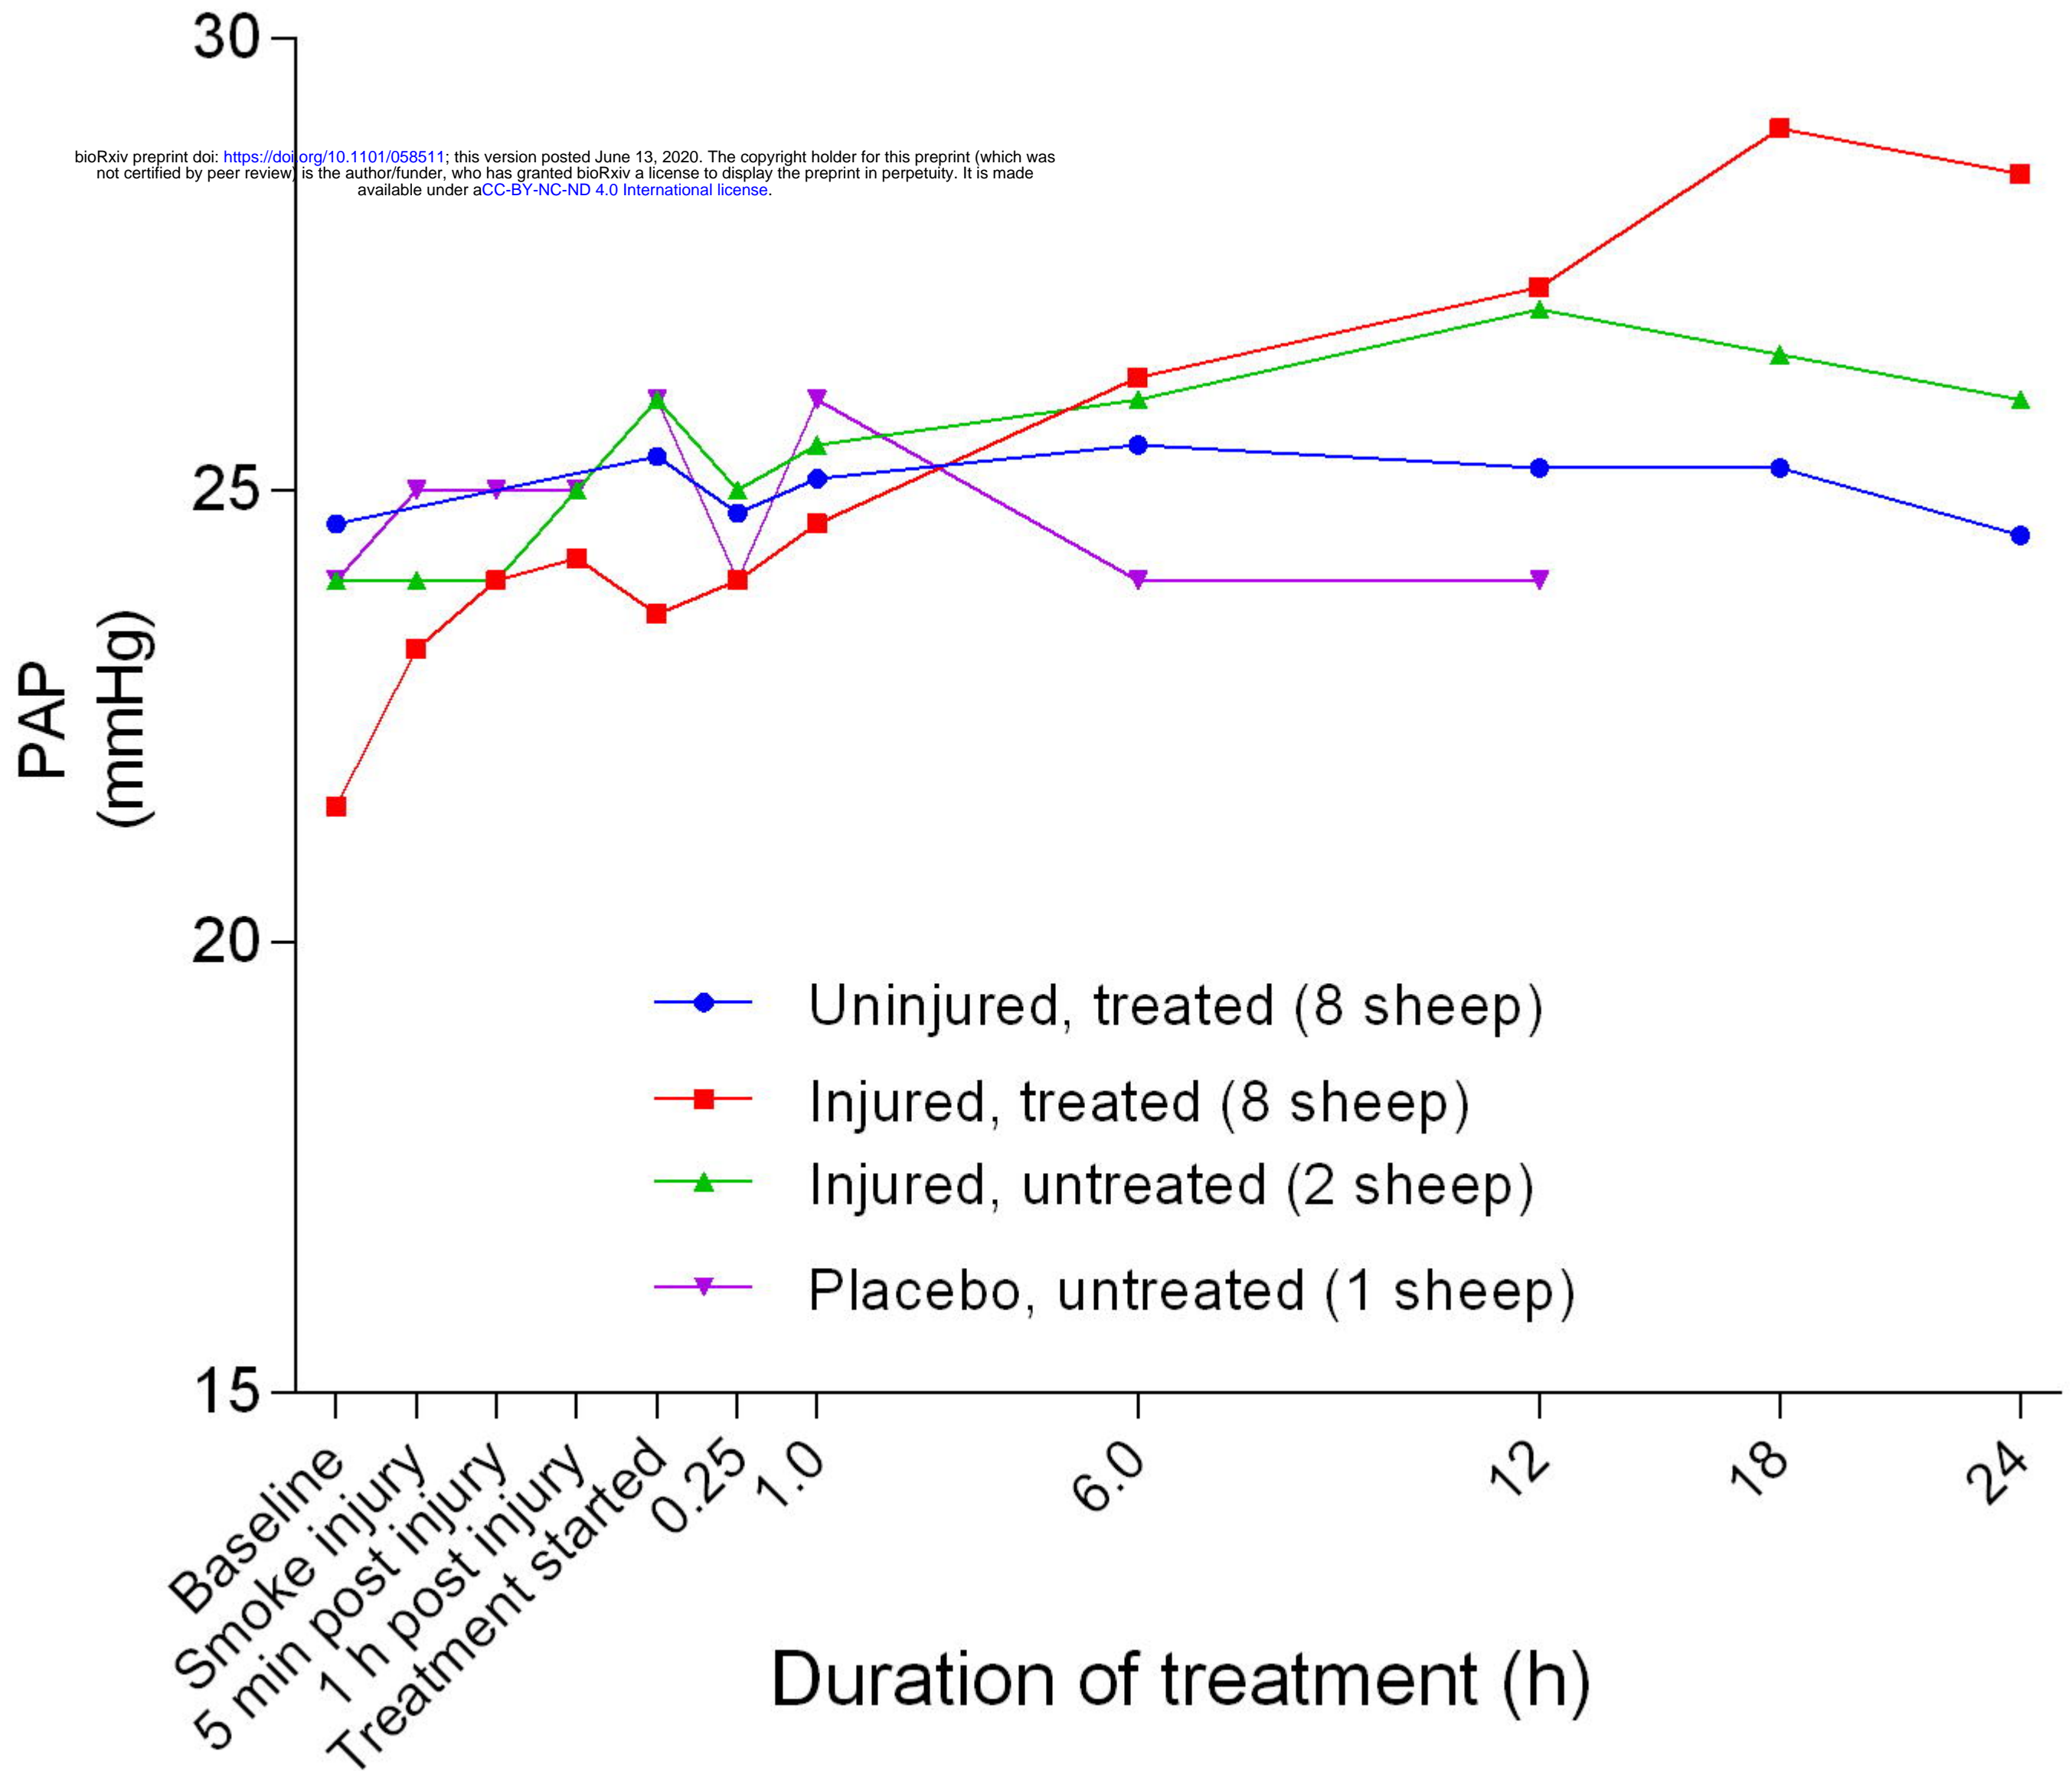



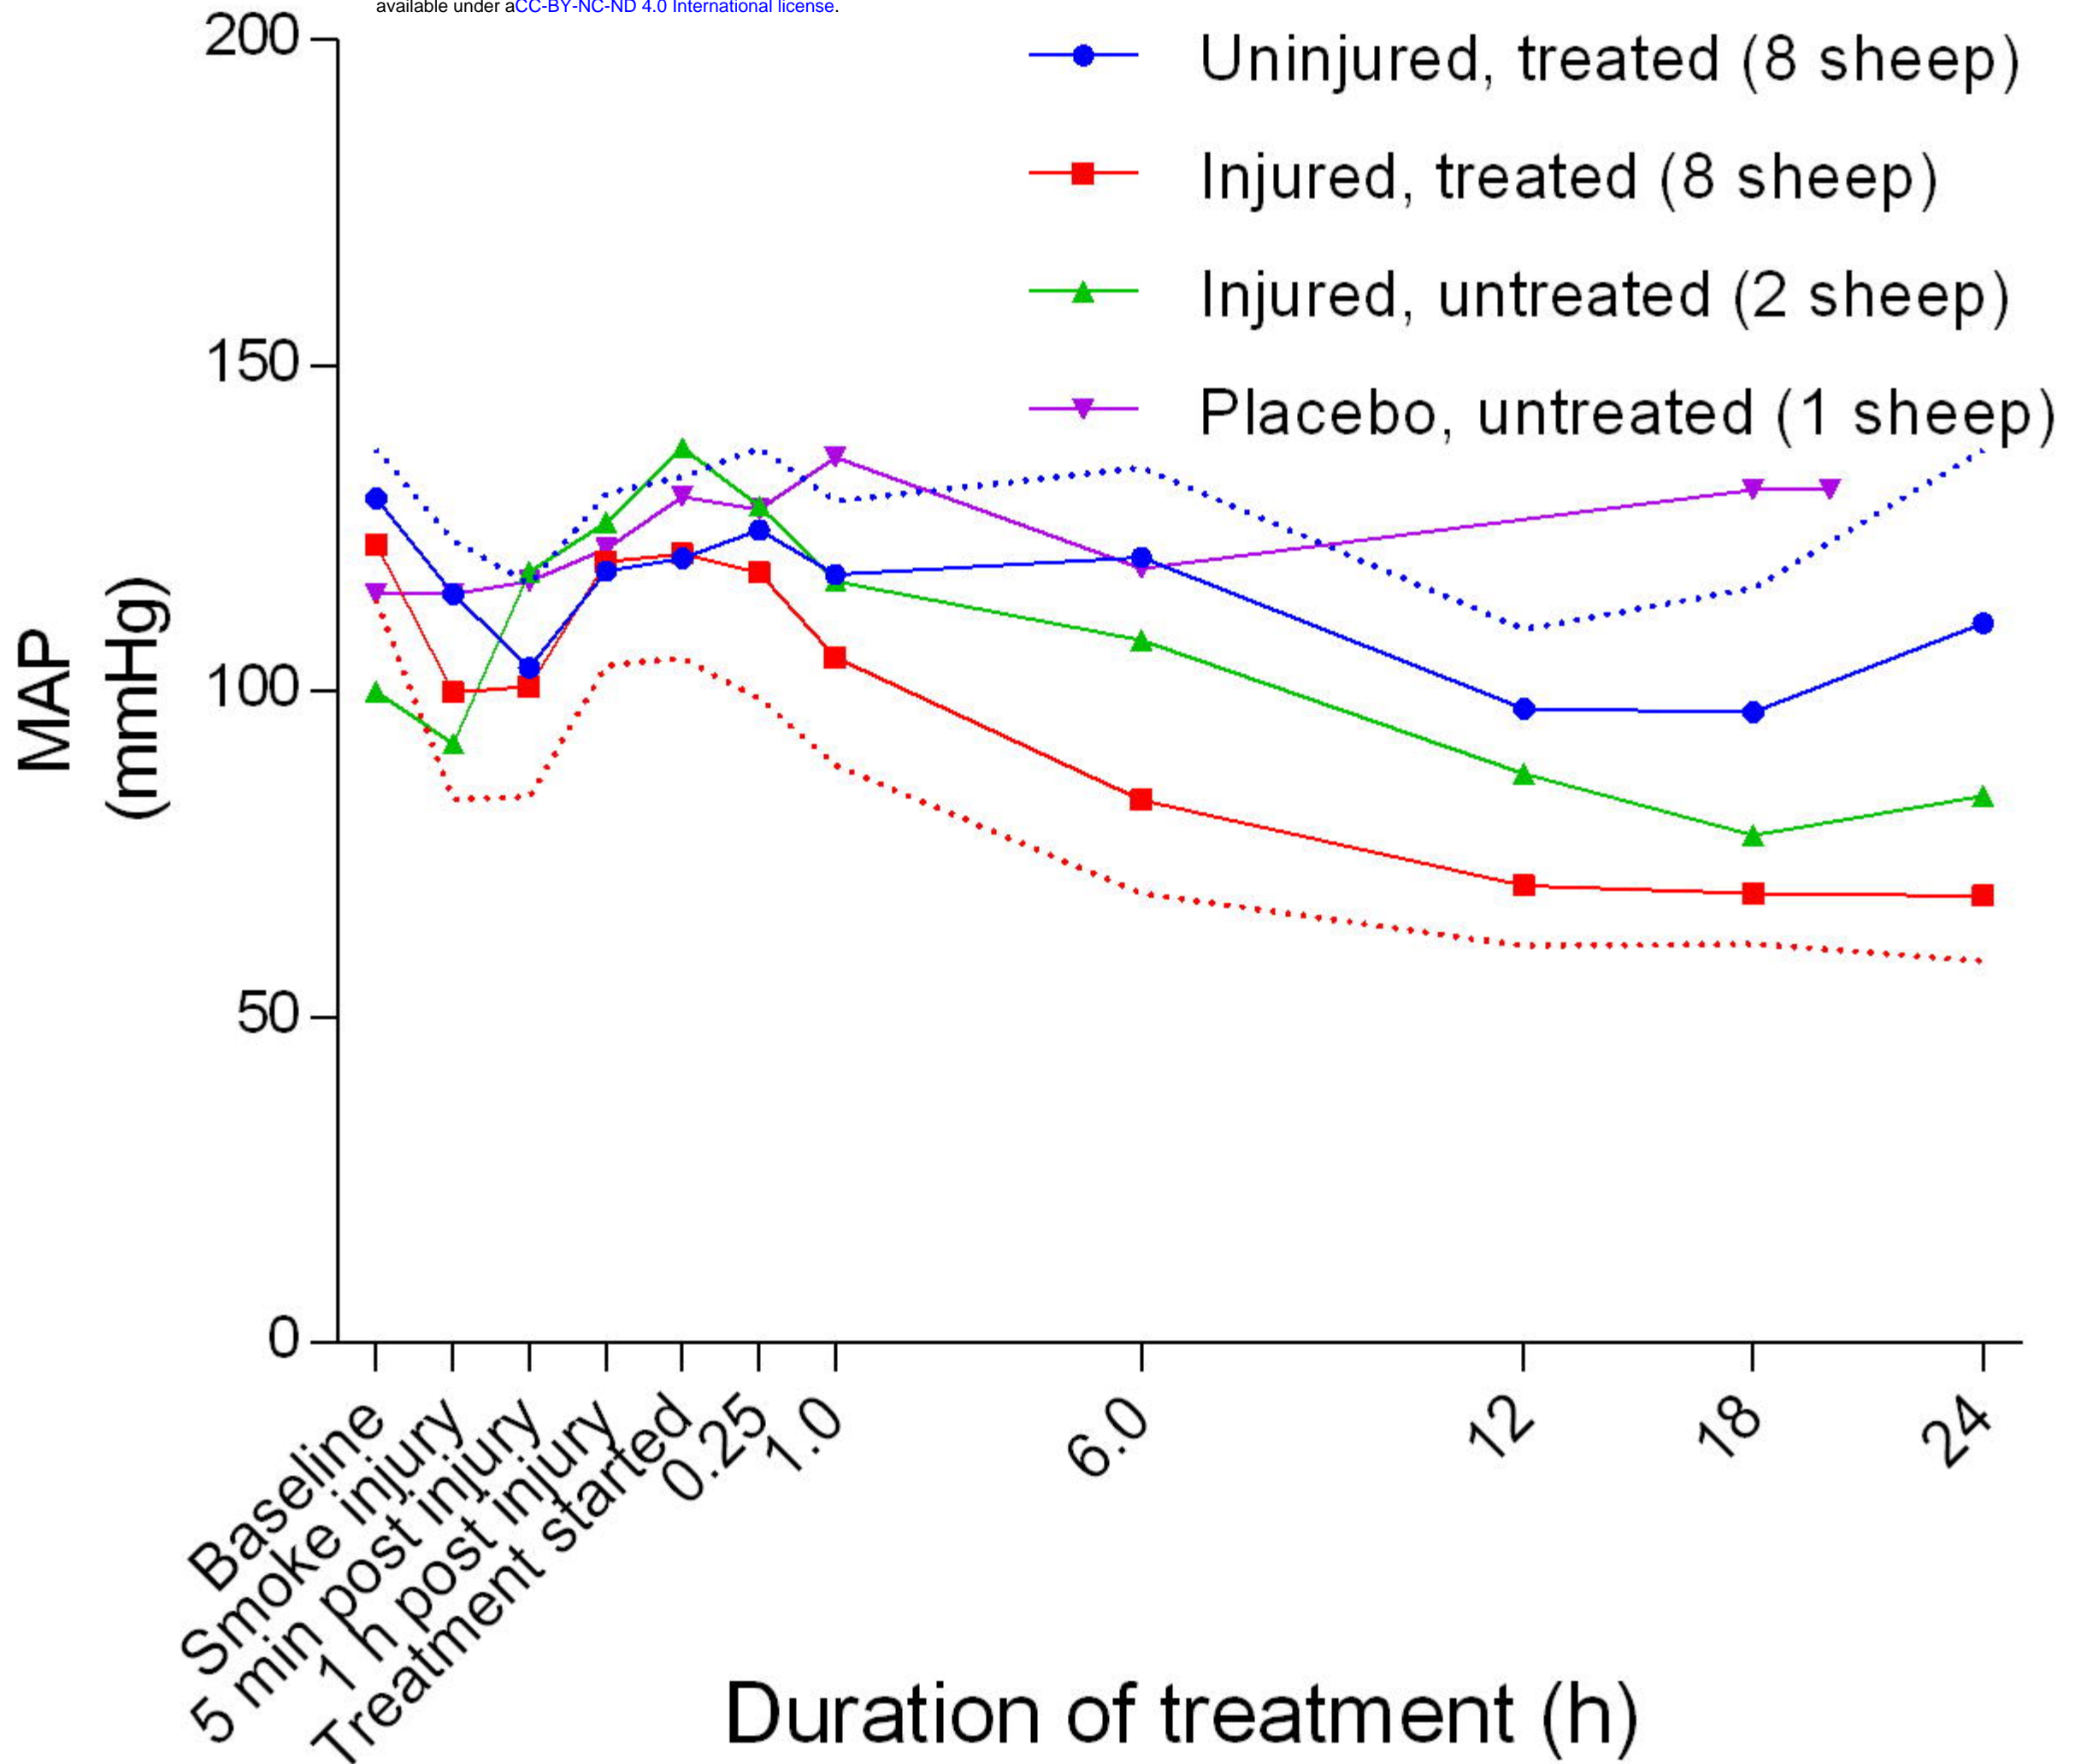

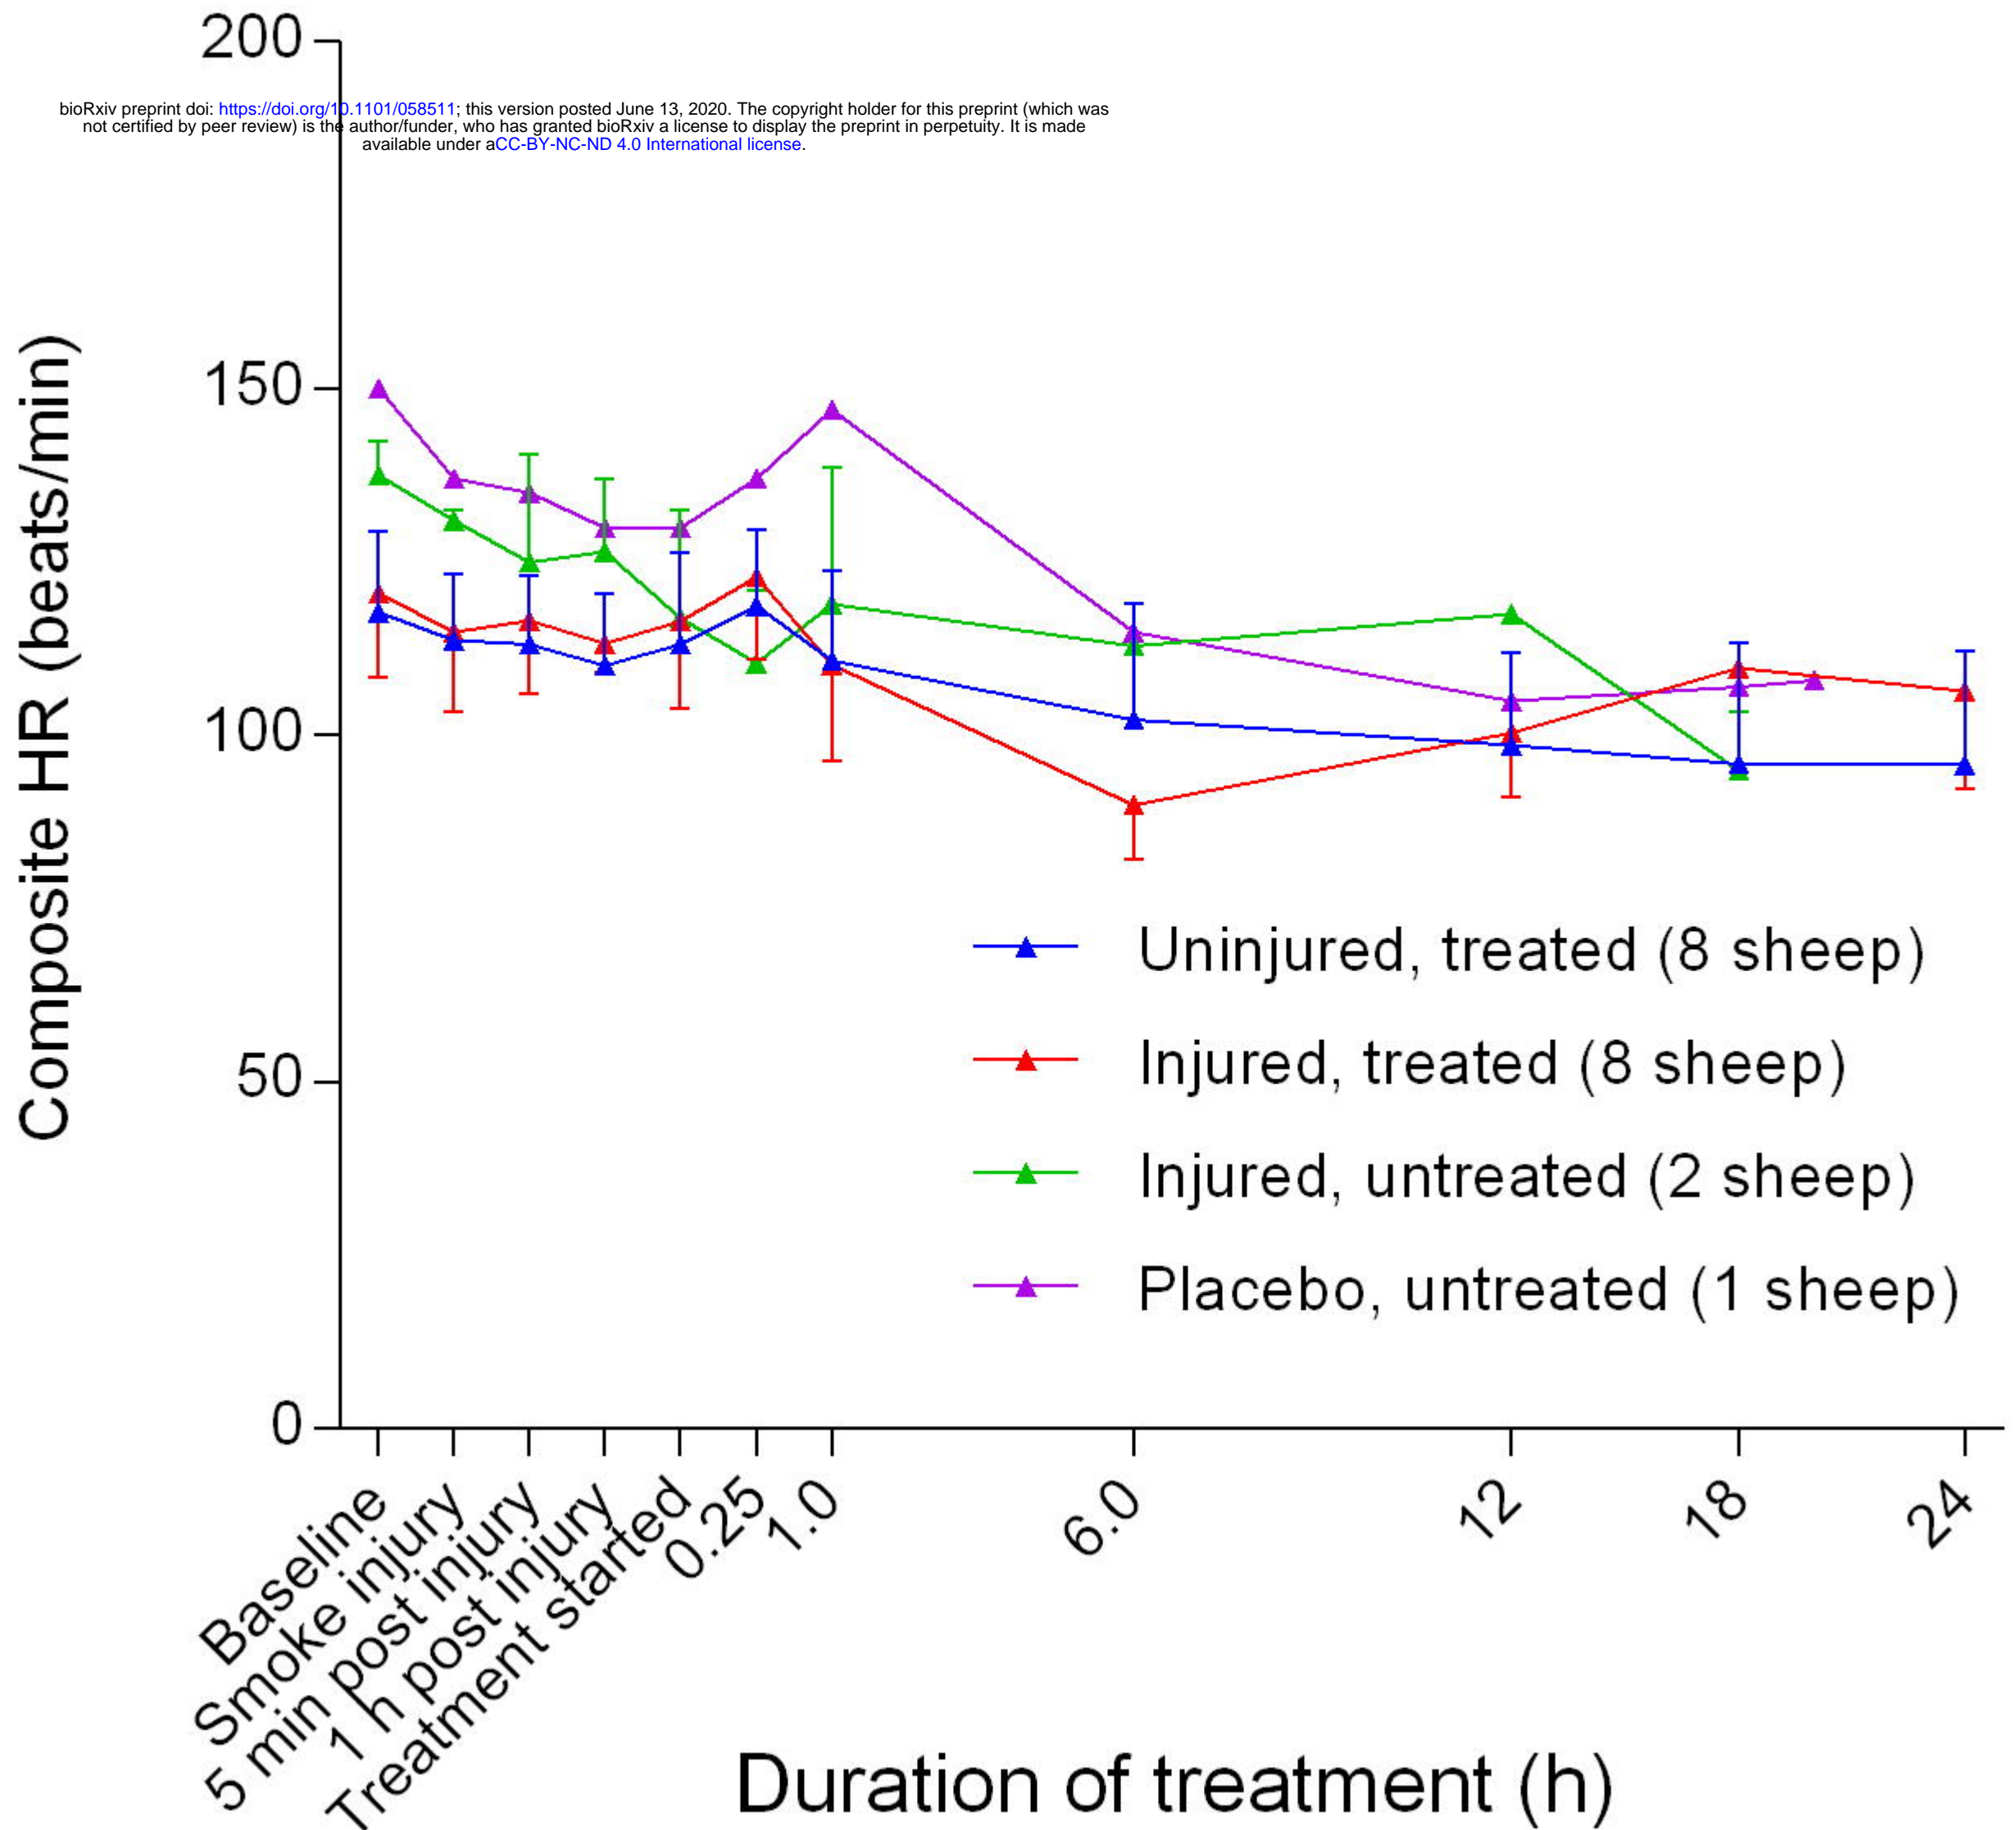



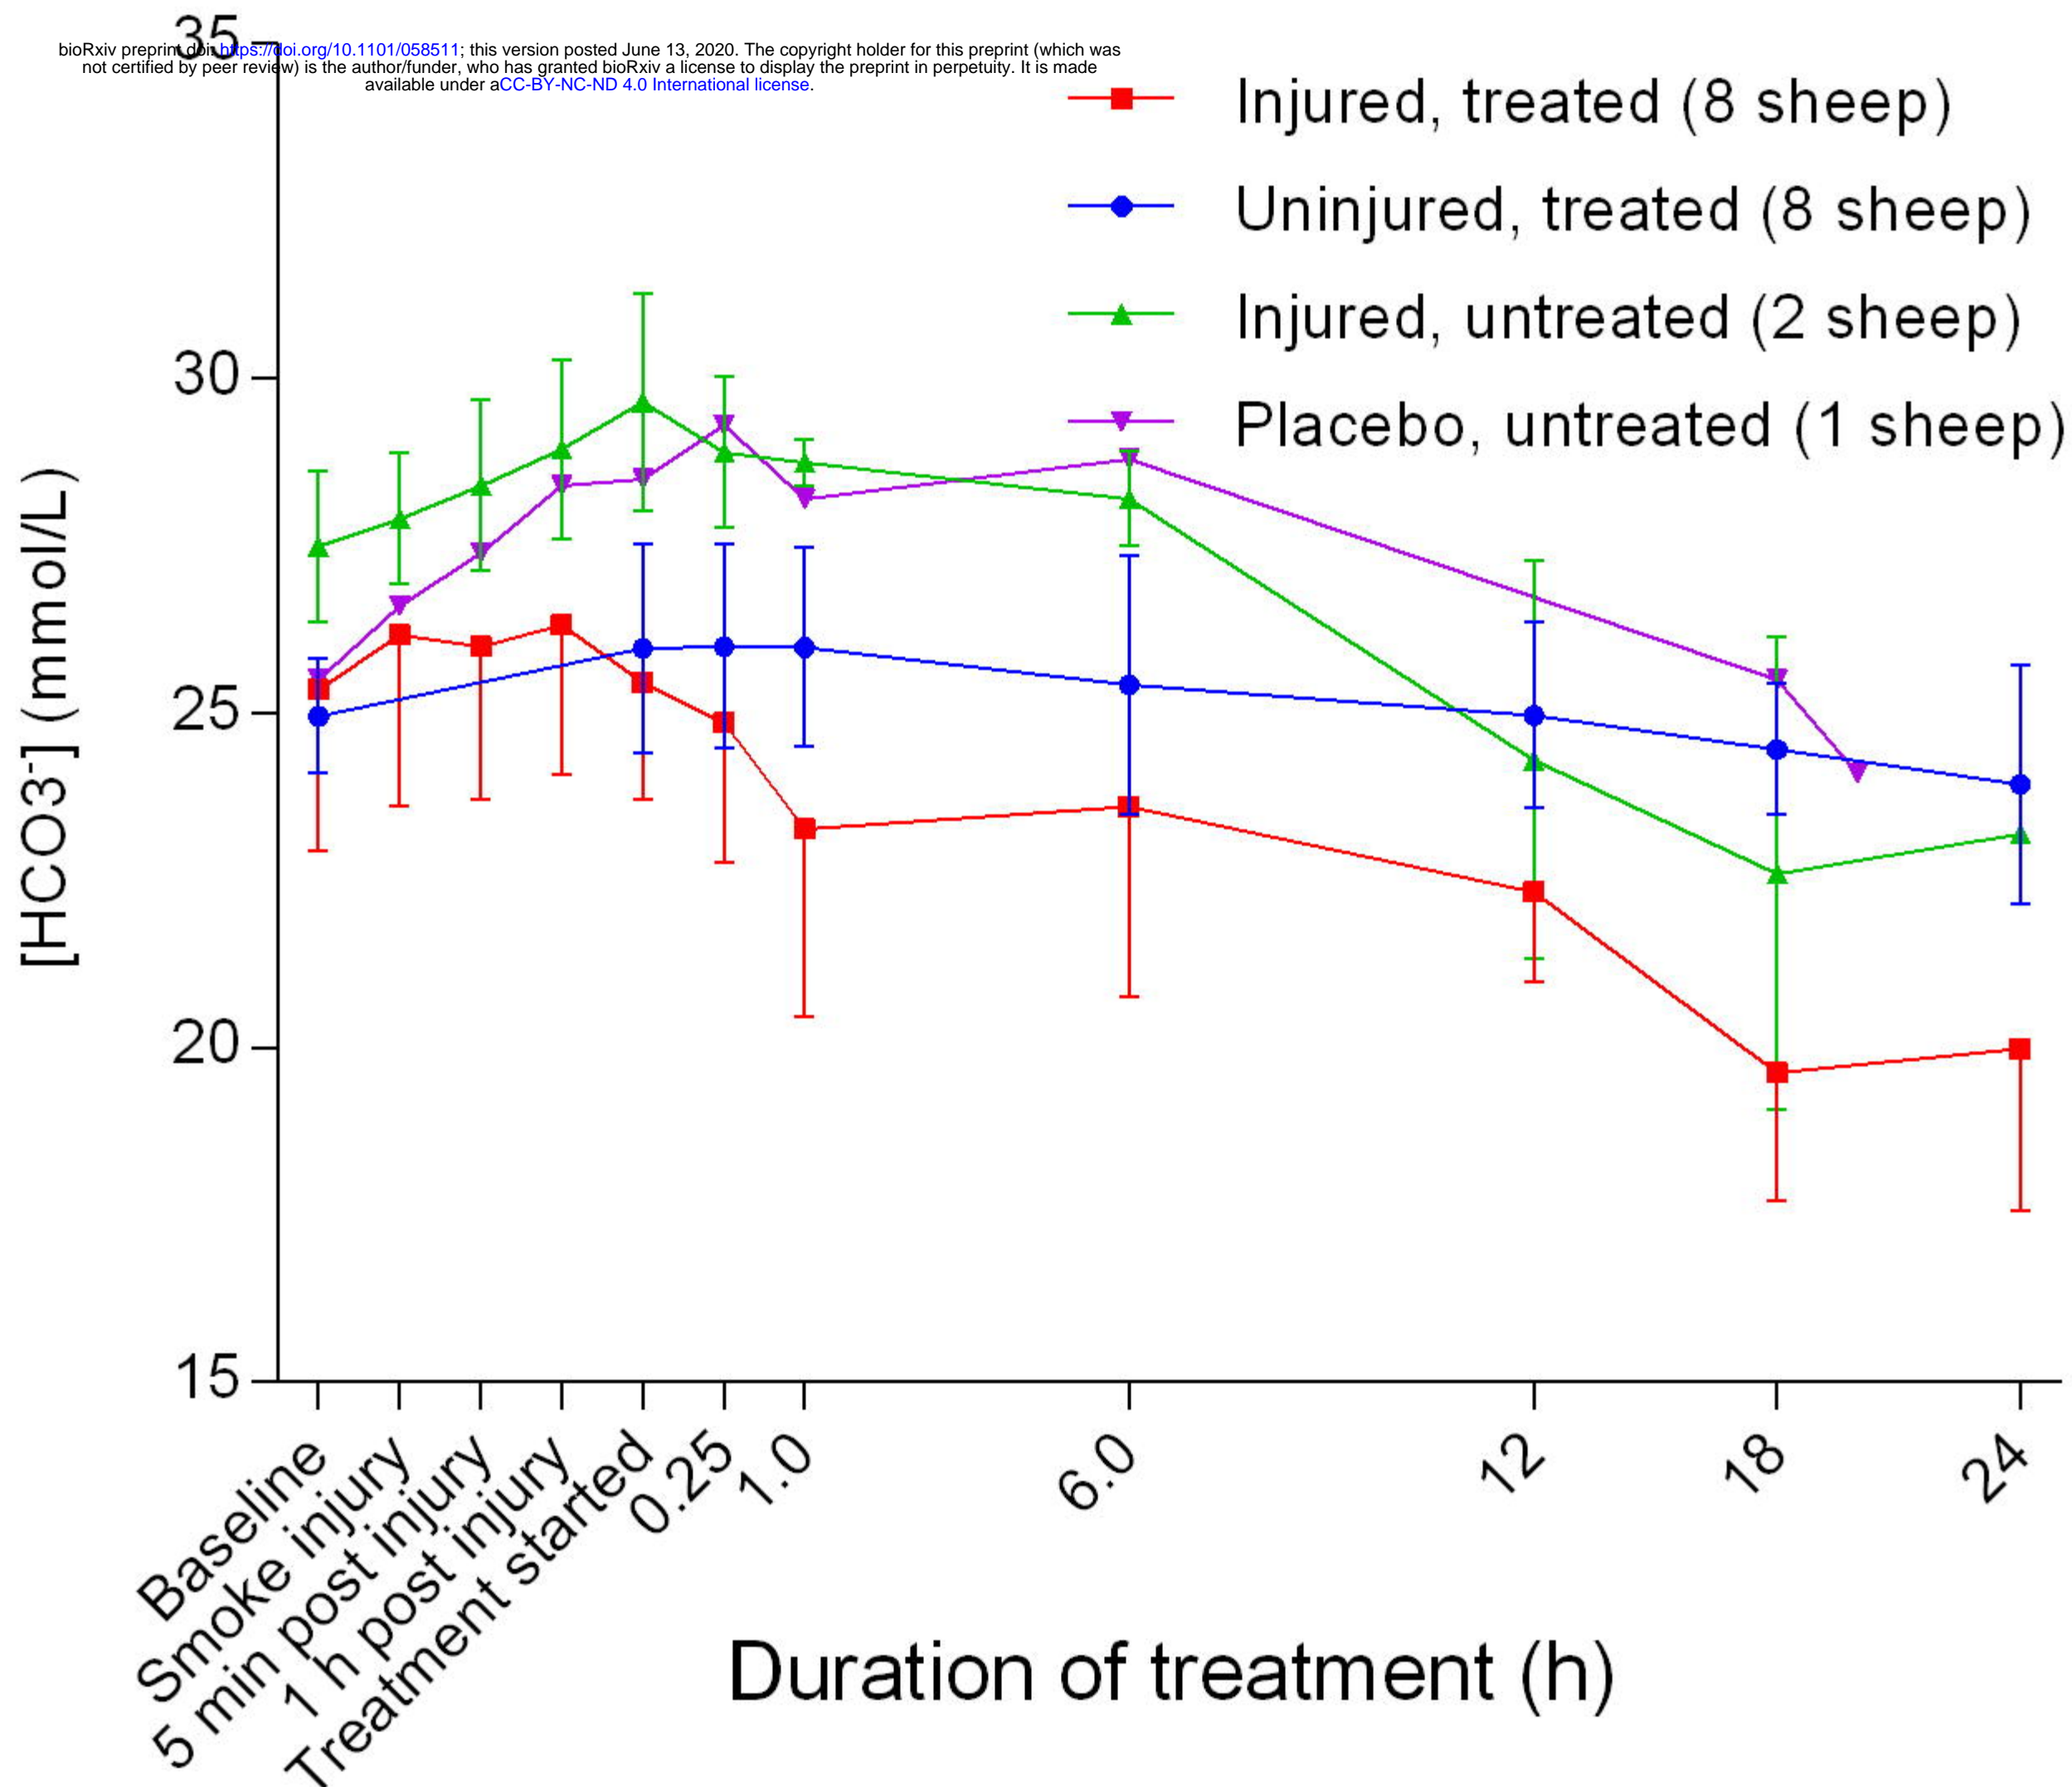

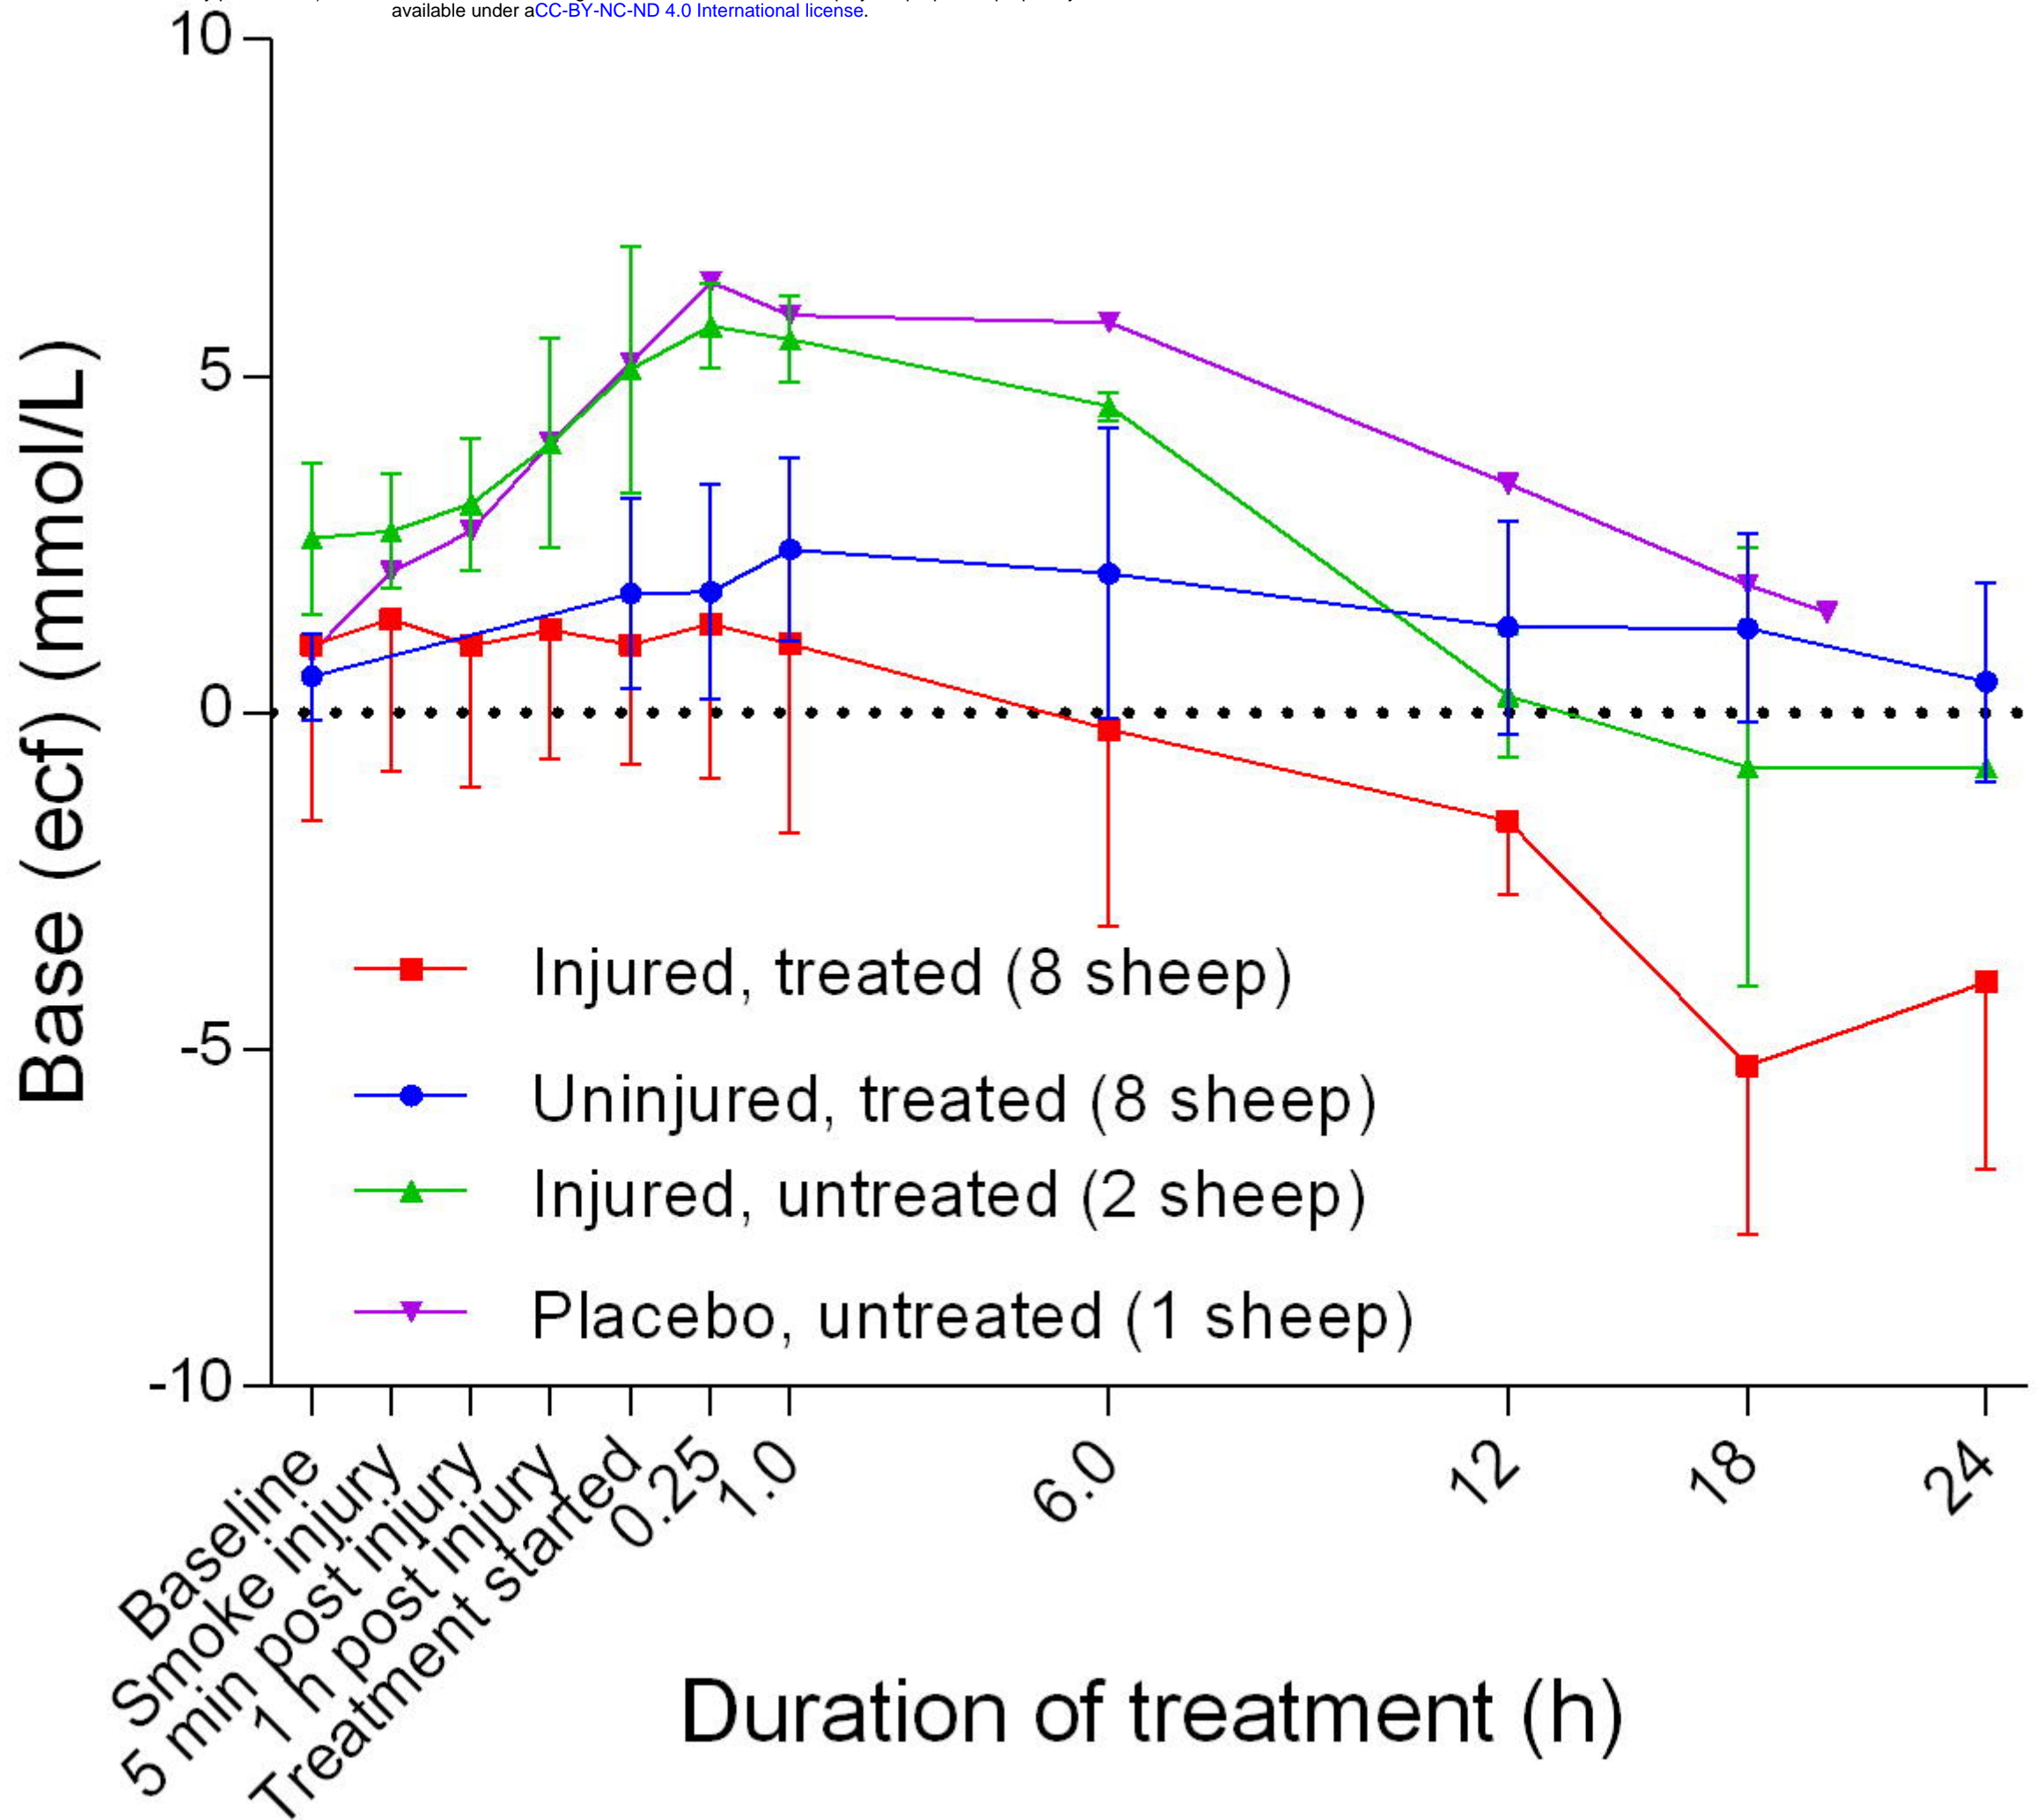

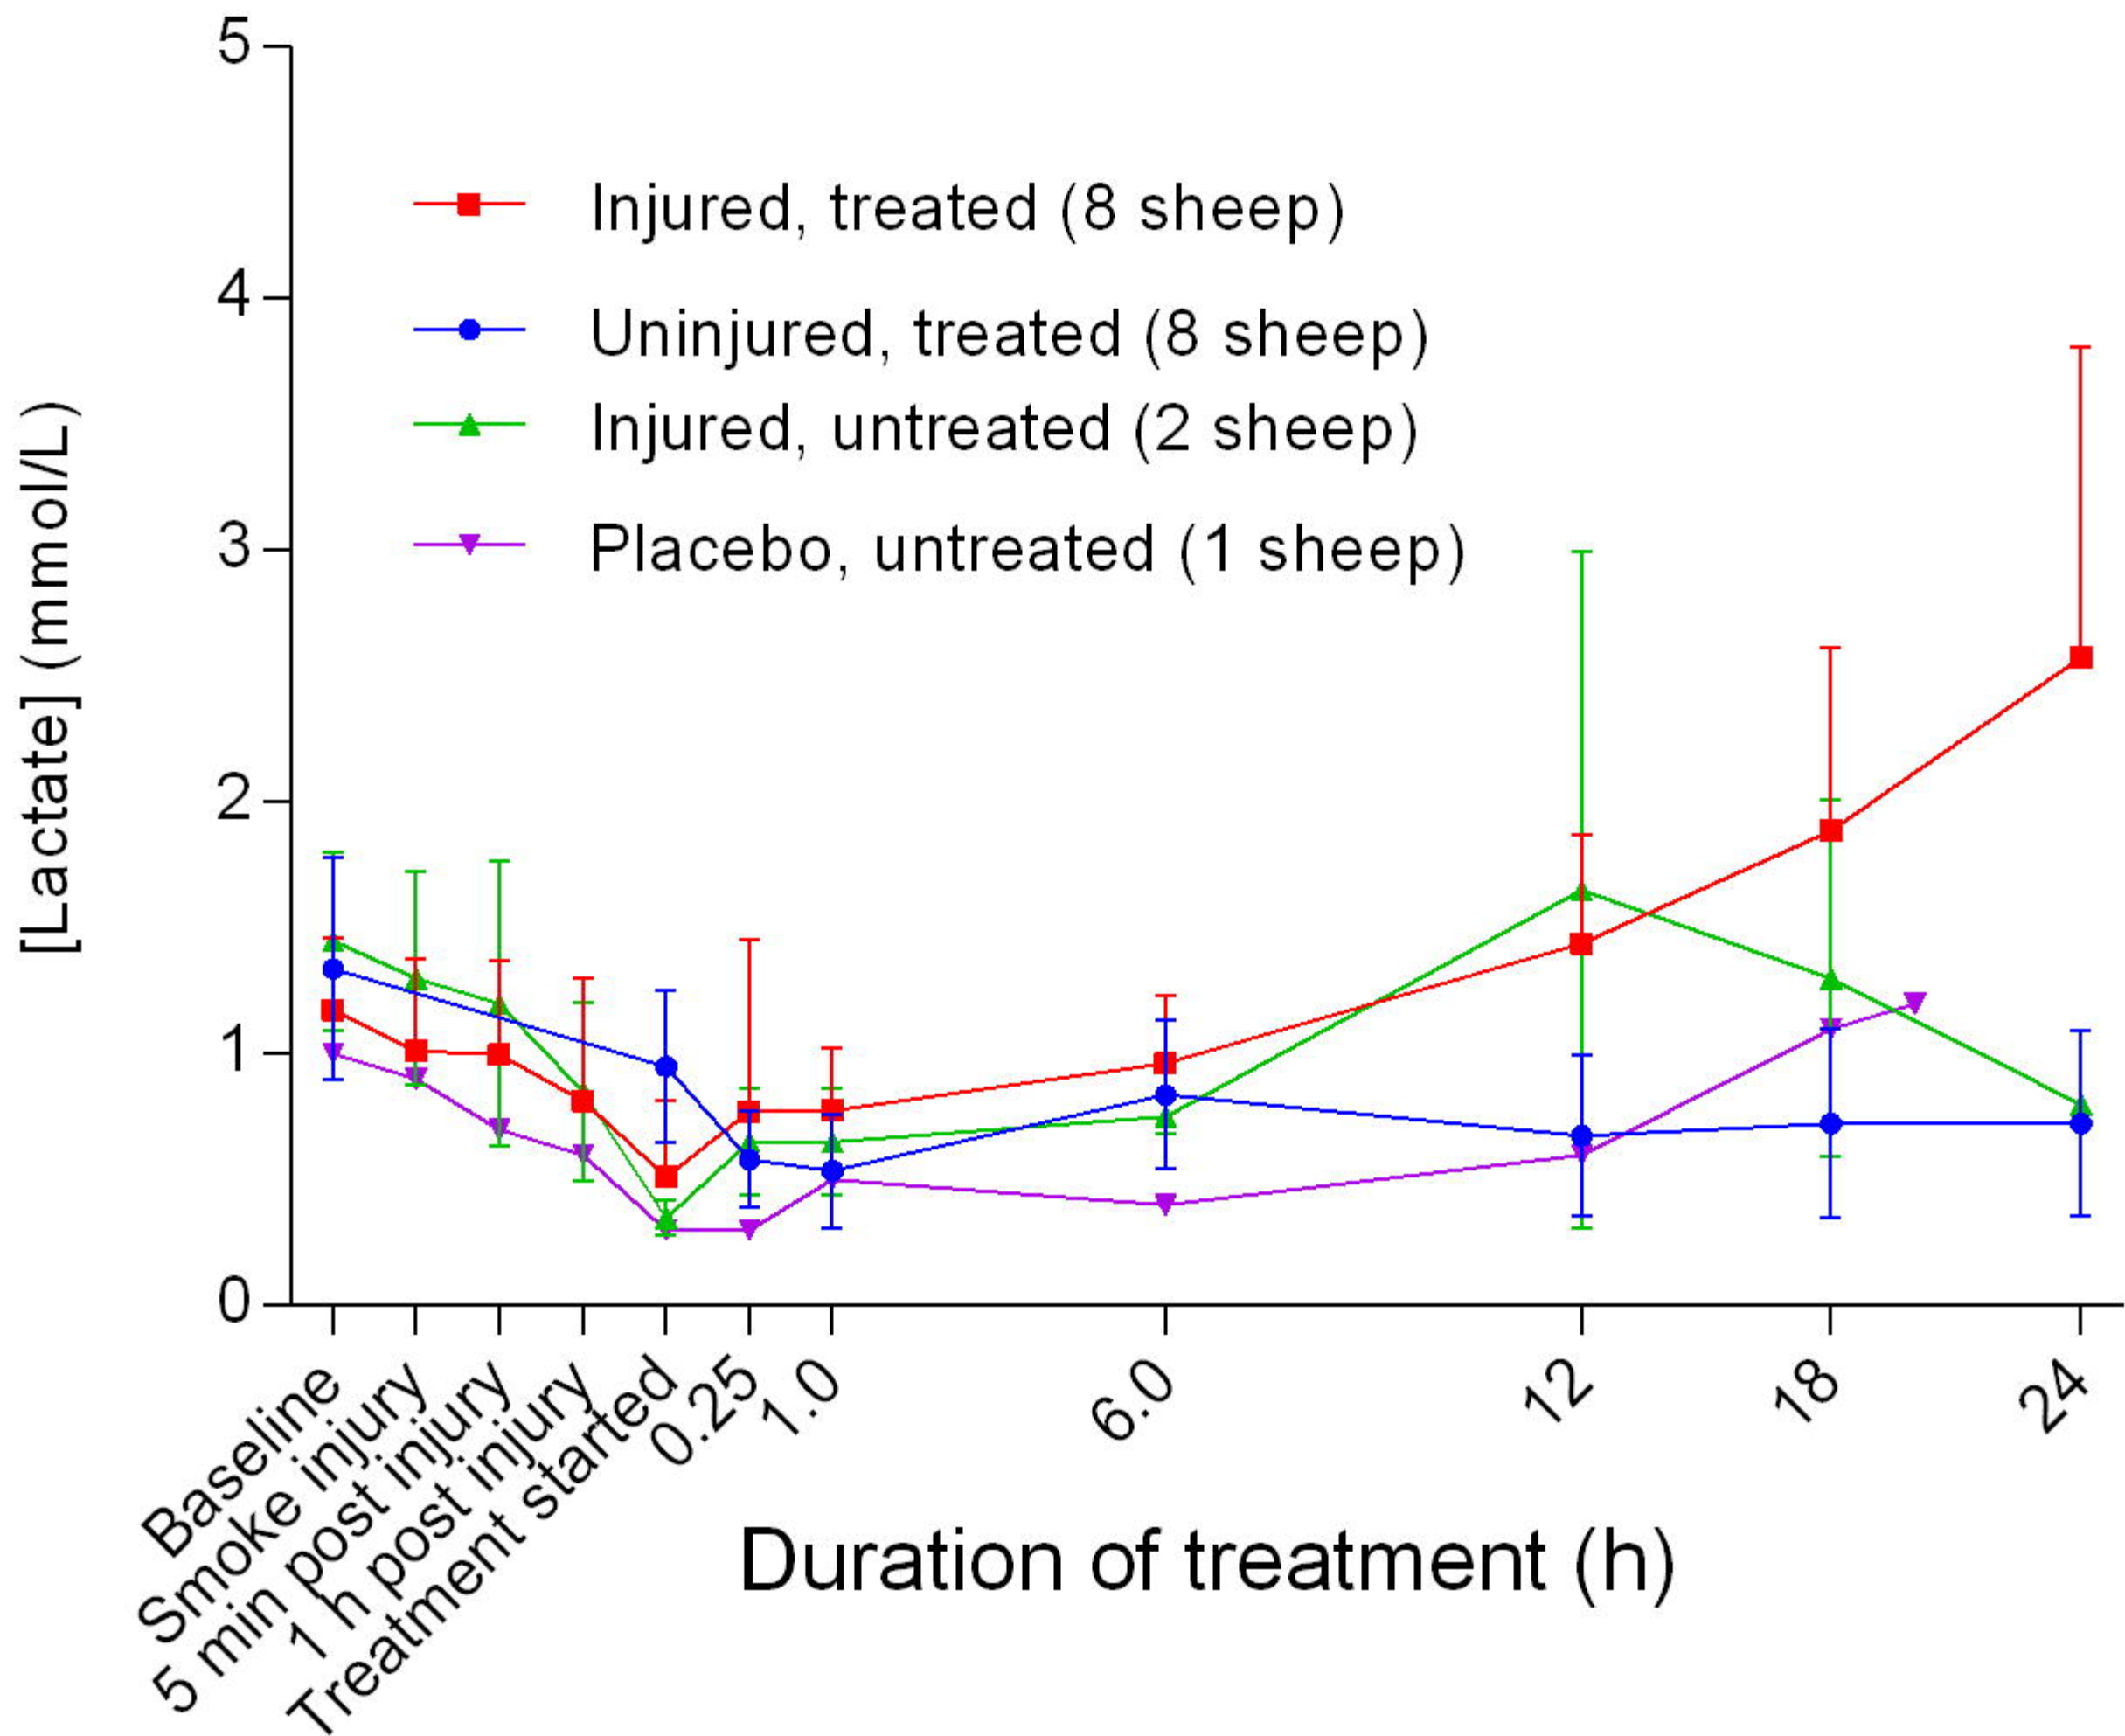



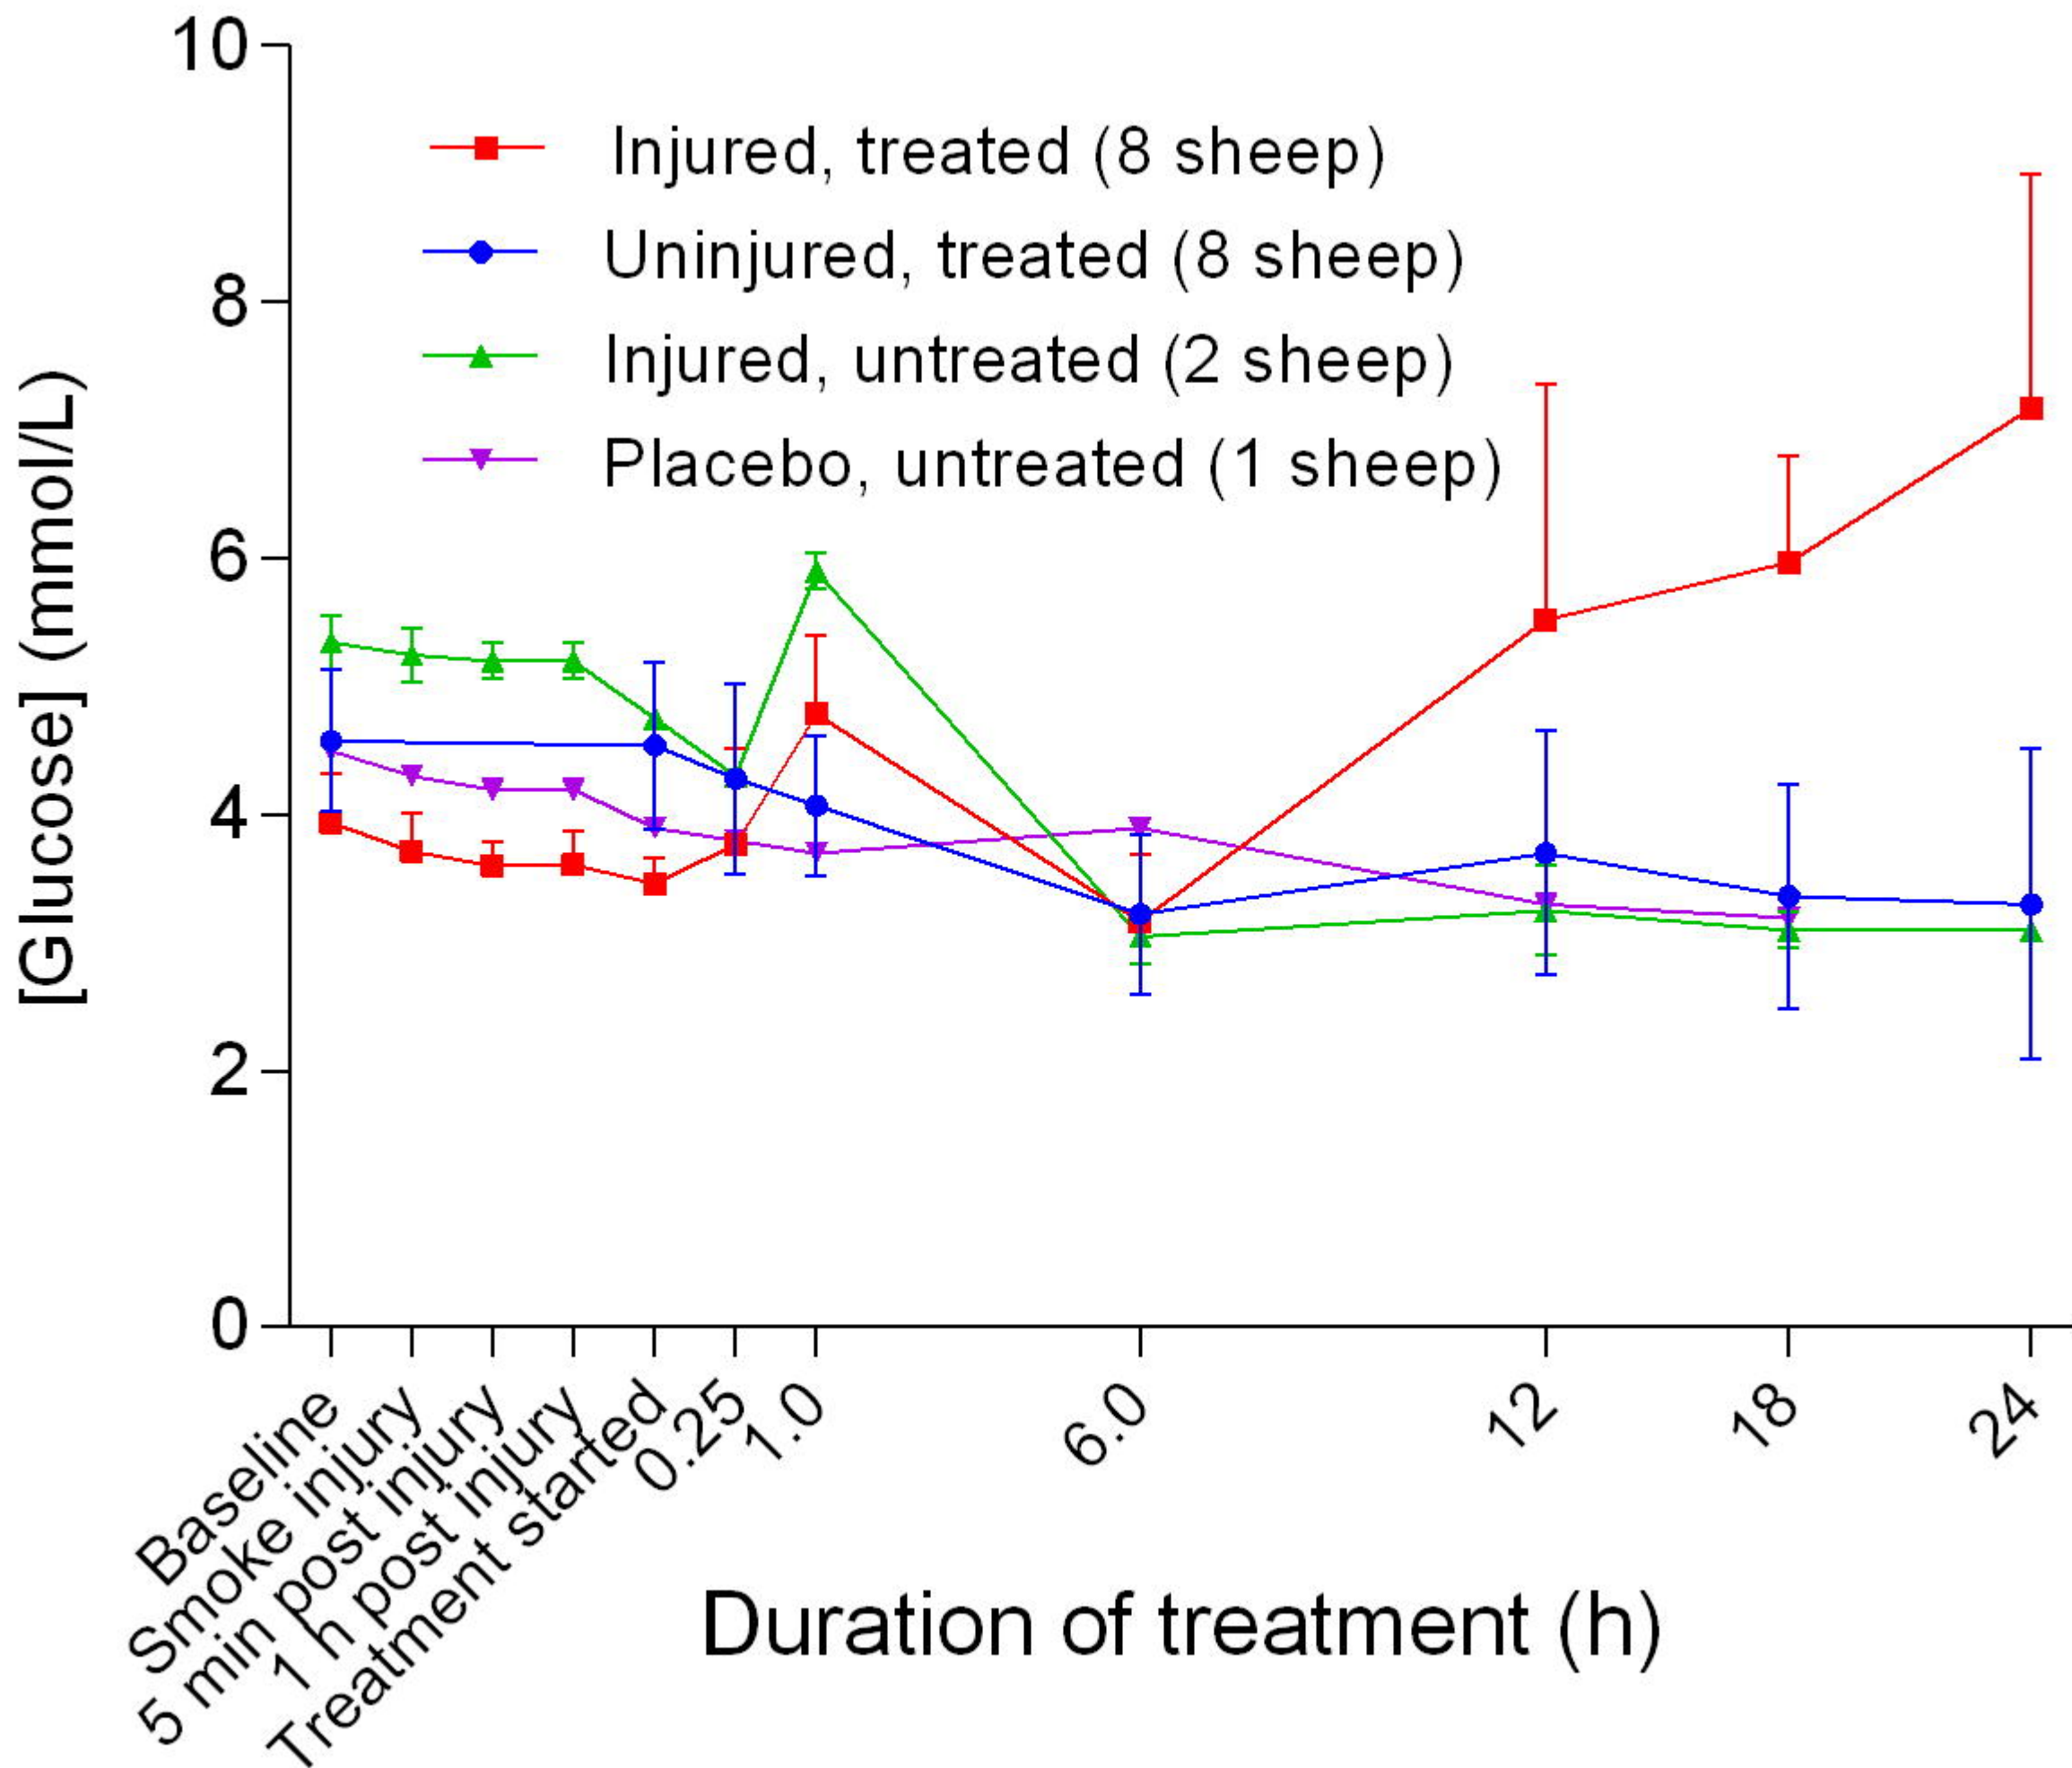

Source: https://www.biorxiv.org/content/10.1101/058511v3.full.pdf
